# Supplementary material
Source: ML conference proceedings conference paper supplement (https://proceedings.neurips.cc/paper_files/paper/2022/hash/820e95997d050178323230e316897c38-Abstract.html)
Supplement: Supplementary file 1 [file 820e95997d050178323230e316897c38-Supplemental-Conference.zip]

Archive with 9 entries (8 files):
- Appendix.pdf
- Experiments/
- Experiments/ACExperiment.py
- Experiments/cpu_times_inst_param.csv
- Experiments/CSFramework.py
- Experiments/Distribution.py
- Experiments/Experiments.ipynb
- Experiments/RoundRobin.py
- Experiments/SuccessiveHalving.py
