# Supplementary material
Source: ML conference proceedings conference paper supplement (https://proceedings.neurips.cc/paper_files/paper/2022/hash/820e95997d050178323230e316897c38-Abstract.html)
Supplement: Supplementary file 1 [file 820e95997d050178323230e316897c38-Supplemental-Conference.zip › Experiments/cpu_times_inst_param.csv]

	CPU_Param_1	CPU_Param_2	CPU_Param_3	CPU_Param_4	CPU_Param_5	CPU_Param_6	CPU_Param_7	CPU_Param_8	CPU_Param_9	CPU_Param_10	CPU_Param_11	CPU_Param_12	CPU_Param_13	CPU_Param_14	CPU_Param_15	CPU_Param_16	CPU_Param_17	CPU_Param_18	CPU_Param_119	CPU_Param_20
SWGCP_only_5000/SWlin2006.15100.cnf	0.04	0.02	0.04	0.06	0.18	0.1	0.02	0.04	0.1	0.02	0.08	0.2	0.02	0.0	0.06	0.04	0.0	0.06	0.02	0.48
SWGCP_only_5000/SWlin2006.15101.cnf	0.12	0.48	0.06	0.06	0.22	0.24	0.08	0.2	0.28	0.24	0.08	0.38	0.46	0.34	0.06	0.32	0.14	0.06	0.56	0.78
SWGCP_only_5000/SWlin2006.15102.cnf	0.2	0.64	0.1	0.1	0.42	0.36	0.1	0.4	0.38	0.12	0.1	0.58	0.82	0.4	0.1	0.5	0.28	0.08	0.7	1.76
SWGCP_only_5000/SWlin2006.15103.cnf	0.12	0.18	0.06	0.04	0.18	0.16	0.08	0.16	0.18	0.18	0.06	0.2	0.22	0.18	0.06	0.2	0.12	0.08	0.3	0.56
SWGCP_only_5000/SWlin2006.15104.cnf	0.16	0.48	0.06	0.06	0.3	0.24	0.02	0.22	0.3	0.24	0.1	0.26	0.04	0.18	0.06	0.32	0.2	0.08	0.6	0.84
SWGCP_only_5000/SWlin2006.15105.cnf	0.22	0.26	0.06	0.12	0.34	0.4	0.08	0.34	0.28	0.32	0.12	0.48	0.32	0.28	0.1	0.42	0.22	0.1	0.64	1.62
SWGCP_only_5000/SWlin2006.15106.cnf	0.26	0.88	0.1	0.12	0.42	0.4	0.14	0.4	0.48	0.22	0.14	0.76	0.68	0.5	0.12	0.6	0.32	0.12	0.8	1.94
SWGCP_only_5000/SWlin2006.15107.cnf	0.22	0.34	0.1	0.1	0.36	0.42	0.12	0.4	0.38	0.36	0.12	0.48	0.68	0.62	0.12	0.5	0.3	0.12	0.82	1.6
SWGCP_only_5000/SWlin2006.15108.cnf	0.26	0.5	0.1	0.12	0.4	0.36	0.14	0.36	0.32	0.34	0.12	0.5	0.62	0.48	0.12	0.48	0.24	0.12	0.94	1.8
SWGCP_only_5000/SWlin2006.15109.cnf	0.24	0.42	0.06	0.1	0.36	0.32	0.1	0.3	0.56	0.44	0.14	0.62	0.92	0.56	0.1	0.56	0.26	0.1	0.64	1.54
SWGCP_only_5000/SWlin2006.15110.cnf	0.16	0.58	0.08	0.08	0.3	0.26	0.08	0.26	0.34	0.24	0.1	0.4	0.7	0.4	0.06	0.38	0.22	0.08	0.64	0.94
SWGCP_only_5000/SWlin2006.15111.cnf	0.22	0.26	0.1	0.1	0.36	0.38	0.12	0.3	0.26	0.34	0.12	0.6	0.36	0.3	0.12	0.4	0.22	0.1	0.84	1.56
SWGCP_only_5000/SWlin2006.15112.cnf	0.14	0.24	0.06	0.06	0.2	0.2	0.08	0.16	0.22	0.18	0.06	0.26	0.28	0.24	0.04	0.26	0.12	0.06	0.44	0.64
SWGCP_only_5000/SWlin2006.15113.cnf	0.22	0.08	0.08	0.08	0.06	0.32	0.1	0.14	0.34	0.34	0.08	0.42	0.16	0.28	0.08	0.26	0.24	0.06	0.26	1.12
SWGCP_only_5000/SWlin2006.15114.cnf	0.1	0.0	0.04	0.06	0.22	0.04	0.08	0.1	0.0	0.02	0.08	0.04	0.0	0.18	0.06	0.06	0.04	0.06	0.32	0.68
SWGCP_only_5000/SWlin2006.15115.cnf	0.2	0.5	0.06	0.1	0.36	0.34	0.1	0.3	0.38	0.38	0.12	0.6	0.78	0.5	0.1	0.38	0.28	0.08	0.68	1.3
SWGCP_only_5000/SWlin2006.15116.cnf	0.0	0.02	0.08	0.06	0.04	0.18	0.08	0.14	0.02	0.06	0.06	0.04	0.06	0.04	0.06	0.02	0.04	0.06	0.4	0.66
SWGCP_only_5000/SWlin2006.15117.cnf	0.2	0.44	0.08	0.08	0.26	0.36	0.1	0.28	0.42	0.38	0.1	0.48	0.32	0.28	0.08	0.42	0.22	0.1	0.56	1.32
SWGCP_only_5000/SWlin2006.15118.cnf	0.12	0.3	0.06	0.04	0.16	0.16	0.08	0.16	0.22	0.2	0.06	0.28	0.38	0.26	0.06	0.22	0.14	0.06	0.34	0.5
SWGCP_only_5000/SWlin2006.15119.cnf	0.12	0.26	0.06	0.04	0.18	0.14	0.06	0.16	0.18	0.18	0.06	0.22	0.26	0.24	0.06	0.2	0.12	0.06	0.32	0.5
SWGCP_only_5000/SWlin2006.15120.cnf	0.18	0.32	0.06	0.08	0.22	0.24	0.08	0.2	0.3	0.28	0.08	0.34	0.44	0.26	0.08	0.34	0.2	0.08	0.56	0.82
SWGCP_only_5000/SWlin2006.15121.cnf	0.06	0.6	0.08	0.08	0.28	0.3	0.08	0.28	0.36	0.3	0.1	0.52	0.72	0.46	0.08	0.36	0.22	0.08	0.56	1.04
SWGCP_only_5000/SWlin2006.15122.cnf	0.26	0.84	0.1	0.12	0.42	0.36	0.12	0.38	0.36	0.38	0.1	0.56	0.7	0.46	0.12	0.48	0.28	0.1	0.58	1.52
SWGCP_only_5000/SWlin2006.15123.cnf	0.06	0.38	0.08	0.08	0.3	0.26	0.1	0.28	0.3	0.18	0.1	0.48	0.5	0.44	0.08	0.34	0.18	0.08	0.68	0.98
SWGCP_only_5000/SWlin2006.15124.cnf	0.16	0.36	0.06	0.06	0.22	0.24	0.06	0.2	0.24	0.24	0.06	0.32	0.38	0.3	0.06	0.3	0.16	0.1	0.34	0.72
SWGCP_only_5000/SWlin2006.15125.cnf	0.22	0.26	0.1	0.08	0.36	0.3	0.12	0.28	0.3	0.34	0.12	0.42	0.5	0.32	0.1	0.42	0.22	0.08	0.62	1.26
SWGCP_only_5000/SWlin2006.15126.cnf	0.2	0.34	0.08	0.08	0.28	0.32	0.1	0.24	0.32	0.3	0.12	0.38	0.44	0.3	0.1	0.36	0.22	0.1	0.72	1.26
SWGCP_only_5000/SWlin2006.15127.cnf	0.18	0.84	0.1	0.12	0.4	0.3	0.12	0.28	0.14	0.4	0.1	0.58	0.68	0.44	0.1	0.52	0.22	0.12	0.64	1.62
SWGCP_only_5000/SWlin2006.15128.cnf	0.1	0.1	0.06	0.08	0.14	0.14	0.06	0.1	0.1	0.14	0.08	0.2	0.14	0.12	0.04	0.2	0.1	0.06	0.3	0.44
SWGCP_only_5000/SWlin2006.15129.cnf	0.22	0.82	0.1	0.1	0.4	0.36	0.12	0.36	0.52	0.2	0.12	0.62	1.0	0.48	0.1	0.5	0.2	0.1	0.9	1.56
SWGCP_only_5000/SWlin2006.15130.cnf	0.24	0.72	0.08	0.08	0.34	0.4	0.1	0.38	0.38	0.16	0.12	0.58	0.42	0.48	0.08	0.46	0.26	0.12	0.88	1.44
SWGCP_only_5000/SWlin2006.15131.cnf	0.14	0.06	0.04	0.06	0.02	0.16	0.06	0.0	0.0	0.0	0.06	0.26	0.02	0.16	0.04	0.2	0.1	0.08	0.06	0.46
SWGCP_only_5000/SWlin2006.15132.cnf	0.14	0.46	0.06	0.06	0.28	0.1	0.08	0.26	0.02	0.28	0.08	0.38	0.56	0.38	0.06	0.08	0.1	0.08	0.1	0.88
SWGCP_only_5000/SWlin2006.15133.cnf	0.14	0.4	0.08	0.06	0.22	0.22	0.08	0.2	0.26	0.26	0.08	0.12	0.54	0.32	0.08	0.28	0.1	0.1	0.28	0.72
SWGCP_only_5000/SWlin2006.15134.cnf	0.02	0.02	0.04	0.04	0.18	0.12	0.02	0.02	0.0	0.0	0.08	0.02	0.0	0.0	0.02	0.02	0.02	0.08	0.08	0.44
SWGCP_only_5000/SWlin2006.15135.cnf	0.14	0.16	0.06	0.04	0.22	0.22	0.08	0.16	0.22	0.22	0.06	0.34	0.2	0.16	0.06	0.28	0.14	0.1	0.36	0.72
SWGCP_only_5000/SWlin2006.15136.cnf	0.16	0.18	0.06	0.08	0.28	0.22	0.06	0.22	0.34	0.04	0.08	0.04	0.1	0.04	0.06	0.3	0.12	0.08	0.08	0.76
SWGCP_only_5000/SWlin2006.15137.cnf	0.2	0.46	0.1	0.1	0.4	0.38	0.1	0.38	0.12	0.44	0.14	0.62	0.08	0.1	0.1	0.56	0.32	0.1	0.96	1.56
SWGCP_only_5000/SWlin2006.15138.cnf	0.24	0.84	0.08	0.08	0.34	0.34	0.14	0.08	0.04	0.36	0.12	0.1	0.34	0.54	0.12	0.52	0.3	0.12	0.24	1.52
SWGCP_only_5000/SWlin2006.15139.cnf	0.28	0.52	0.1	0.12	0.42	0.5	0.12	0.4	0.44	0.56	0.14	0.72	1.08	0.54	0.12	0.52	0.26	0.1	0.84	1.88
SWGCP_only_5000/SWlin2006.15140.cnf	0.28	0.14	0.12	0.14	0.46	0.12	0.14	0.38	0.56	0.52	0.12	0.72	0.34	0.76	0.14	0.46	0.34	0.1	1.18	1.94
SWGCP_only_5000/SWlin2006.15141.cnf	0.1	0.32	0.06	0.06	0.2	0.18	0.06	0.18	0.24	0.2	0.08	0.28	0.36	0.26	0.06	0.24	0.16	0.06	0.4	0.54
SWGCP_only_5000/SWlin2006.15142.cnf	0.24	0.66	0.08	0.08	0.38	0.34	0.12	0.28	0.46	0.4	0.14	0.56	0.14	0.36	0.1	0.52	0.22	0.12	0.56	1.52
SWGCP_only_5000/SWlin2006.15143.cnf	0.2	0.24	0.08	0.1	0.34	0.34	0.12	0.3	0.24	0.36	0.12	0.5	0.3	0.26	0.08	0.34	0.2	0.1	0.74	1.48
SWGCP_only_5000/SWlin2006.15144.cnf	0.16	0.38	0.04	0.06	0.2	0.22	0.06	0.16	0.28	0.22	0.08	0.34	0.46	0.3	0.06	0.28	0.16	0.1	0.42	0.66
SWGCP_only_5000/SWlin2006.15145.cnf	0.18	0.46	0.08	0.06	0.26	0.22	0.08	0.22	0.2	0.28	0.08	0.44	0.6	0.28	0.06	0.32	0.18	0.1	0.5	0.84
SWGCP_only_5000/SWlin2006.15146.cnf	0.12	0.36	0.04	0.06	0.2	0.18	0.08	0.16	0.24	0.2	0.08	0.3	0.46	0.3	0.08	0.22	0.14	0.06	0.38	0.6
SWGCP_only_5000/SWlin2006.15147.cnf	0.16	0.36	0.04	0.06	0.22	0.2	0.06	0.2	0.24	0.26	0.06	0.36	0.36	0.32	0.06	0.28	0.18	0.08	0.46	0.7
SWGCP_only_5000/SWlin2006.15148.cnf	0.14	0.72	0.1	0.08	0.36	0.38	0.1	0.32	0.46	0.42	0.12	0.22	0.2	0.5	0.1	0.38	0.24	0.1	0.94	1.44
SWGCP_only_5000/SWlin2006.15149.cnf	0.18	0.54	0.08	0.06	0.28	0.28	0.08	0.28	0.4	0.3	0.08	0.46	0.62	0.42	0.08	0.34	0.22	0.08	0.64	0.92
SWGCP_only_5000/SWlin2006.15150.cnf	0.22	0.44	0.08	0.12	0.46	0.46	0.14	0.44	0.38	0.38	0.14	0.6	0.56	0.64	0.1	0.44	0.32	0.12	1.0	1.96
SWGCP_only_5000/SWlin2006.15151.cnf	0.24	0.44	0.1	0.1	0.4	0.46	0.12	0.42	0.52	0.36	0.14	0.7	0.86	0.4	0.08	0.44	0.18	0.1	0.76	1.7
SWGCP_only_5000/SWlin2006.15152.cnf	0.22	0.44	0.08	0.1	0.4	0.3	0.1	0.32	0.14	0.28	0.1	0.54	0.88	0.08	0.08	0.42	0.18	0.1	0.84	1.34
SWGCP_only_5000/SWlin2006.15153.cnf	0.24	0.1	0.1	0.1	0.42	0.36	0.12	0.42	0.56	0.2	0.14	0.64	0.72	0.46	0.1	0.54	0.3	0.12	0.18	1.74
SWGCP_only_5000/SWlin2006.15154.cnf	0.08	0.02	0.06	0.08	0.12	0.06	0.06	0.08	0.12	0.24	0.08	0.04	0.06	0.1	0.06	0.04	0.12	0.08	0.5	0.68
SWGCP_only_5000/SWlin2006.15155.cnf	0.18	0.36	0.08	0.08	0.24	0.22	0.1	0.22	0.34	0.28	0.1	0.42	0.6	0.32	0.08	0.32	0.2	0.1	0.54	0.84
SWGCP_only_5000/SWlin2006.15156.cnf	0.28	0.72	0.1	0.12	0.52	0.42	0.12	0.4	0.42	0.52	0.12	0.46	0.82	0.54	0.12	0.54	0.3	0.12	0.84	1.9
SWGCP_only_5000/SWlin2006.15157.cnf	0.22	0.22	0.12	0.1	0.4	0.44	0.14	0.38	0.38	0.42	0.12	0.58	0.34	0.32	0.1	0.52	0.2	0.12	0.84	1.94
SWGCP_only_5000/SWlin2006.15158.cnf	0.2	0.6	0.08	0.08	0.3	0.06	0.08	0.28	0.06	0.32	0.1	0.5	0.04	0.48	0.08	0.42	0.16	0.1	0.06	1.1
SWGCP_only_5000/SWlin2006.15159.cnf	0.2	0.32	0.08	0.08	0.34	0.32	0.1	0.3	0.36	0.38	0.1	0.56	0.72	0.44	0.08	0.36	0.22	0.1	0.56	1.22
SWGCP_only_5000/SWlin2006.15160.cnf	0.2	0.4	0.1	0.12	0.34	0.36	0.14	0.34	0.44	0.32	0.12	0.52	0.42	0.4	0.08	0.42	0.24	0.1	0.96	1.52
SWGCP_only_5000/SWlin2006.15161.cnf	0.1	0.22	0.04	0.08	0.16	0.2	0.08	0.06	0.04	0.24	0.06	0.32	0.02	0.2	0.06	0.08	0.04	0.06	0.52	0.7
SWGCP_only_5000/SWlin2006.15162.cnf	0.22	0.24	0.1	0.08	0.4	0.34	0.12	0.32	0.3	0.34	0.12	0.5	0.32	0.3	0.08	0.46	0.18	0.08	0.52	1.6
SWGCP_only_5000/SWlin2006.15163.cnf	0.22	0.56	0.06	0.06	0.32	0.34	0.06	0.3	0.42	0.18	0.12	0.48	0.06	0.1	0.1	0.46	0.24	0.08	0.5	1.24
SWGCP_only_5000/SWlin2006.15164.cnf	0.34	0.72	0.1	0.12	0.34	0.48	0.14	0.4	0.14	0.34	0.14	0.74	0.9	0.48	0.12	0.5	0.32	0.1	1.02	2.02
SWGCP_only_5000/SWlin2006.15165.cnf	0.18	0.22	0.08	0.08	0.26	0.28	0.1	0.3	0.3	0.3	0.1	0.36	0.28	0.32	0.06	0.34	0.16	0.1	0.5	1.18
SWGCP_only_5000/SWlin2006.15166.cnf	0.18	0.28	0.1	0.1	0.28	0.34	0.1	0.26	0.3	0.32	0.1	0.48	0.38	0.28	0.06	0.4	0.18	0.1	0.8	1.22
SWGCP_only_5000/SWlin2006.15167.cnf	0.2	0.48	0.08	0.06	0.34	0.12	0.08	0.24	0.4	0.3	0.1	0.44	0.5	0.08	0.08	0.06	0.22	0.1	0.54	1.0
SWGCP_only_5000/SWlin2006.15168.cnf	0.22	0.32	0.08	0.08	0.34	0.26	0.1	0.28	0.34	0.32	0.1	0.54	0.58	0.38	0.06	0.4	0.2	0.08	0.56	1.16
SWGCP_only_5000/SWlin2006.15169.cnf	0.14	0.26	0.06	0.06	0.2	0.18	0.08	0.18	0.22	0.2	0.06	0.28	0.34	0.22	0.06	0.26	0.16	0.06	0.4	0.6
SWGCP_only_5000/SWlin2006.15170.cnf	0.24	0.36	0.08	0.12	0.38	0.38	0.12	0.34	0.34	0.38	0.1	0.4	0.6	0.42	0.1	0.56	0.26	0.12	0.72	1.54
SWGCP_only_5000/SWlin2006.15171.cnf	0.24	0.66	0.1	0.12	0.4	0.34	0.12	0.36	0.64	0.46	0.12	0.64	0.58	0.7	0.1	0.46	0.32	0.12	1.0	1.72
SWGCP_only_5000/SWlin2006.15172.cnf	0.22	0.26	0.12	0.1	0.34	0.32	0.1	0.36	0.48	0.16	0.1	0.7	0.9	0.54	0.1	0.54	0.12	0.1	0.62	1.38
SWGCP_only_5000/SWlin2006.15173.cnf	0.26	0.46	0.1	0.12	0.38	0.44	0.14	0.38	0.48	0.42	0.14	0.54	0.58	0.36	0.1	0.52	0.28	0.08	0.72	1.9
SWGCP_only_5000/SWlin2006.15174.cnf	0.2	0.04	0.1	0.08	0.08	0.12	0.1	0.04	0.38	0.36	0.12	0.5	0.76	0.42	0.08	0.1	0.06	0.08	0.16	1.1
SWGCP_only_5000/SWlin2006.15175.cnf	0.26	0.04	0.1	0.1	0.38	0.34	0.1	0.22	0.34	0.14	0.12	0.64	0.92	0.42	0.1	0.54	0.28	0.1	0.74	1.48
SWGCP_only_5000/SWlin2006.15176.cnf	0.12	0.16	0.06	0.06	0.16	0.16	0.06	0.14	0.16	0.16	0.06	0.22	0.16	0.16	0.04	0.16	0.12	0.08	0.3	0.56
SWGCP_only_5000/SWlin2006.15177.cnf	0.2	0.28	0.06	0.08	0.26	0.32	0.08	0.28	0.34	0.24	0.1	0.5	0.64	0.42	0.08	0.4	0.22	0.08	0.72	1.14
SWGCP_only_5000/SWlin2006.15178.cnf	0.28	0.5	0.12	0.12	0.52	0.44	0.12	0.36	0.48	0.44	0.12	0.72	0.88	0.32	0.1	0.62	0.32	0.12	0.86	1.84
SWGCP_only_5000/SWlin2006.15179.cnf	0.24	0.72	0.1	0.1	0.42	0.4	0.12	0.4	0.42	0.34	0.1	0.68	0.88	0.58	0.08	0.46	0.26	0.1	0.86	1.6
SWGCP_only_5000/SWlin2006.15180.cnf	0.26	0.52	0.08	0.1	0.38	0.4	0.12	0.34	0.44	0.32	0.12	0.7	0.86	0.4	0.1	0.48	0.24	0.1	0.78	1.54
SWGCP_only_5000/SWlin2006.15181.cnf	0.22	0.54	0.08	0.12	0.34	0.36	0.12	0.38	0.38	0.38	0.1	0.54	0.84	0.5	0.1	0.36	0.26	0.1	0.72	1.5
SWGCP_only_5000/SWlin2006.15182.cnf	0.2	0.08	0.08	0.08	0.32	0.28	0.08	0.28	0.46	0.36	0.08	0.5	0.6	0.44	0.1	0.5	0.04	0.1	0.8	1.28
SWGCP_only_5000/SWlin2006.15183.cnf	0.26	0.42	0.1	0.1	0.42	0.34	0.12	0.38	0.08	0.38	0.14	0.56	0.68	0.58	0.1	0.54	0.26	0.12	0.74	1.52
SWGCP_only_5000/SWlin2006.15184.cnf	0.22	0.5	0.08	0.08	0.38	0.32	0.1	0.36	0.36	0.44	0.1	0.7	0.58	0.58	0.1	0.26	0.24	0.12	0.92	1.48
SWGCP_only_5000/SWlin2006.15185.cnf	0.1	0.26	0.04	0.08	0.16	0.14	0.04	0.16	0.18	0.14	0.06	0.24	0.32	0.2	0.06	0.18	0.12	0.06	0.3	0.44
SWGCP_only_5000/SWlin2006.15186.cnf	0.24	0.42	0.08	0.12	0.42	0.18	0.1	0.34	0.4	0.44	0.14	0.62	0.7	0.4	0.1	0.5	0.14	0.12	0.76	1.58
SWGCP_only_5000/SWlin2006.15187.cnf	0.2	0.5	0.08	0.1	0.32	0.32	0.1	0.28	0.32	0.36	0.1	0.54	0.78	0.44	0.06	0.5	0.26	0.1	0.66	1.46
SWGCP_only_5000/SWlin2006.15188.cnf	0.16	0.38	0.04	0.08	0.18	0.16	0.06	0.16	0.22	0.16	0.06	0.24	0.38	0.26	0.06	0.22	0.14	0.08	0.36	0.52
SWGCP_only_5000/SWlin2006.15189.cnf	0.16	0.06	0.08	0.08	0.04	0.22	0.02	0.06	0.3	0.26	0.08	0.36	0.02	0.02	0.04	0.22	0.04	0.06	0.46	0.74
SWGCP_only_5000/SWlin2006.15190.cnf	0.28	0.48	0.1	0.1	0.36	0.4	0.12	0.34	0.48	0.34	0.12	0.6	0.7	0.68	0.1	0.52	0.26	0.12	0.76	1.62
SWGCP_only_5000/SWlin2006.15191.cnf	0.24	0.48	0.1	0.12	0.48	0.4	0.1	0.36	0.56	0.42	0.12	0.54	0.74	0.52	0.1	0.54	0.3	0.12	0.72	1.8
SWGCP_only_5000/SWlin2006.15192.cnf	0.12	0.16	0.08	0.08	0.24	0.22	0.1	0.2	0.18	0.2	0.08	0.32	0.22	0.2	0.08	0.26	0.14	0.08	0.38	0.82
SWGCP_only_5000/SWlin2006.15193.cnf	0.24	0.48	0.1	0.12	0.34	0.38	0.12	0.36	0.44	0.36	0.12	0.48	0.68	0.44	0.12	0.56	0.26	0.1	0.74	1.96
SWGCP_only_5000/SWlin2006.15194.cnf	0.16	0.36	0.08	0.08	0.32	0.34	0.08	0.28	0.38	0.24	0.1	0.4	0.7	0.38	0.08	0.36	0.2	0.1	0.56	1.08
SWGCP_only_5000/SWlin2006.15195.cnf	0.28	0.7	0.12	0.1	0.38	0.4	0.1	0.34	0.12	0.48	0.14	0.64	0.9	0.1	0.12	0.42	0.28	0.14	0.7	1.78
SWGCP_only_5000/SWlin2006.15196.cnf	0.16	0.04	0.08	0.06	0.2	0.2	0.08	0.04	0.1	0.1	0.08	0.04	0.16	0.04	0.06	0.28	0.02	0.06	0.1	0.62
SWGCP_only_5000/SWlin2006.15197.cnf	0.18	0.02	0.08	0.06	0.26	0.28	0.08	0.26	0.36	0.3	0.08	0.12	0.46	0.3	0.06	0.36	0.22	0.1	0.7	0.96
SWGCP_only_5000/SWlin2006.15198.cnf	0.22	0.38	0.1	0.1	0.32	0.28	0.1	0.28	0.36	0.28	0.1	0.38	0.46	0.4	0.08	0.4	0.22	0.1	0.6	1.14
SWGCP_only_5000/SWlin2006.15199.cnf	0.22	0.8	0.1	0.1	0.36	0.36	0.1	0.34	0.4	0.36	0.14	0.6	0.62	0.22	0.1	0.56	0.28	0.12	0.92	1.56
SWGCP_only_5000/SWlin2006.15200.cnf	0.22	0.54	0.08	0.08	0.36	0.34	0.1	0.3	0.36	0.34	0.1	0.48	0.38	0.42	0.08	0.44	0.22	0.1	0.64	1.34
SWGCP_only_5000/SWlin2006.15201.cnf	0.2	0.22	0.08	0.1	0.36	0.36	0.1	0.3	0.06	0.38	0.12	0.18	0.72	0.08	0.1	0.5	0.26	0.1	0.62	1.28
SWGCP_only_5000/SWlin2006.15202.cnf	0.14	0.22	0.06	0.08	0.24	0.22	0.06	0.2	0.22	0.24	0.1	0.28	0.3	0.26	0.08	0.28	0.18	0.08	0.48	0.78
SWGCP_only_5000/SWlin2006.15203.cnf	0.24	0.48	0.1	0.12	0.36	0.34	0.12	0.3	0.34	0.36	0.12	0.64	0.54	0.52	0.12	0.42	0.24	0.12	0.7	1.9
SWGCP_only_5000/SWlin2006.15204.cnf	0.16	0.72	0.08	0.08	0.34	0.32	0.06	0.16	0.06	0.36	0.1	0.56	0.72	0.04	0.08	0.32	0.1	0.08	0.1	1.16
SWGCP_only_5000/SWlin2006.15205.cnf	0.24	0.66	0.1	0.1	0.42	0.48	0.12	0.4	0.52	0.42	0.14	0.7	0.82	0.48	0.12	0.38	0.26	0.12	1.12	1.66
SWGCP_only_5000/SWlin2006.15206.cnf	0.26	0.68	0.1	0.1	0.42	0.36	0.1	0.36	0.06	0.44	0.1	0.58	0.72	0.6	0.1	0.48	0.2	0.1	0.86	1.5
SWGCP_only_5000/SWlin2006.15207.cnf	0.2	0.44	0.1	0.1	0.42	0.36	0.12	0.32	0.4	0.38	0.12	0.44	0.7	0.44	0.08	0.42	0.26	0.1	0.58	1.54
SWGCP_only_5000/SWlin2006.15208.cnf	0.14	0.26	0.06	0.08	0.22	0.2	0.08	0.18	0.28	0.2	0.08	0.32	0.4	0.26	0.06	0.24	0.14	0.08	0.4	0.68
SWGCP_only_5000/SWlin2006.15209.cnf	0.08	0.04	0.08	0.08	0.22	0.3	0.12	0.28	0.38	0.38	0.1	0.5	0.16	0.48	0.08	0.38	0.24	0.08	0.48	1.06
SWGCP_only_5000/SWlin2006.15210.cnf	0.2	0.72	0.08	0.1	0.42	0.08	0.1	0.34	0.5	0.14	0.12	0.48	0.62	0.44	0.1	0.52	0.24	0.08	0.88	1.44
SWGCP_only_5000/SWlin2006.15211.cnf	0.28	0.46	0.12	0.1	0.36	0.48	0.14	0.4	0.12	0.36	0.14	0.74	0.4	0.54	0.12	0.6	0.28	0.12	0.94	1.8
SWGCP_only_5000/SWlin2006.15212.cnf	0.1	0.34	0.06	0.06	0.2	0.2	0.06	0.16	0.26	0.18	0.08	0.28	0.38	0.28	0.04	0.24	0.14	0.08	0.38	0.58
SWGCP_only_5000/SWlin2006.15213.cnf	0.28	0.84	0.08	0.1	0.06	0.2	0.12	0.34	0.6	0.2	0.14	0.58	0.84	0.66	0.08	0.58	0.3	0.1	0.82	1.62
SWGCP_only_5000/SWlin2006.15214.cnf	0.02	0.04	0.04	0.06	0.02	0.08	0.02	0.1	0.04	0.0	0.06	0.02	0.02	0.12	0.06	0.04	0.0	0.08	0.06	0.46
SWGCP_only_5000/SWlin2006.15215.cnf	0.16	0.32	0.04	0.08	0.26	0.24	0.1	0.24	0.28	0.28	0.1	0.42	0.38	0.28	0.08	0.34	0.18	0.1	0.64	0.94
SWGCP_only_5000/SWlin2006.15216.cnf	0.14	0.06	0.06	0.06	0.16	0.24	0.08	0.24	0.34	0.32	0.08	0.46	0.06	0.42	0.06	0.38	0.18	0.1	0.18	0.92
SWGCP_only_5000/SWlin2006.15217.cnf	0.28	0.42	0.1	0.1	0.42	0.38	0.12	0.36	0.48	0.4	0.14	0.6	0.74	0.44	0.08	0.52	0.32	0.12	0.84	1.68
SWGCP_only_5000/SWlin2006.15218.cnf	0.18	0.46	0.06	0.08	0.32	0.26	0.08	0.28	0.32	0.28	0.1	0.4	0.52	0.42	0.08	0.36	0.2	0.1	0.5	1.0
SWGCP_only_5000/SWlin2006.15219.cnf	0.24	0.58	0.1	0.1	0.4	0.12	0.12	0.32	0.42	0.18	0.12	0.1	0.46	0.14	0.1	0.48	0.28	0.1	0.7	1.48
SWGCP_only_5000/SWlin2006.15220.cnf	0.14	0.18	0.06	0.08	0.22	0.22	0.06	0.2	0.2	0.24	0.06	0.34	0.2	0.18	0.06	0.26	0.14	0.08	0.44	0.72
SWGCP_only_5000/SWlin2006.15221.cnf	0.14	0.42	0.06	0.04	0.22	0.22	0.08	0.18	0.26	0.18	0.08	0.32	0.32	0.26	0.06	0.26	0.18	0.08	0.5	0.66
SWGCP_only_5000/SWlin2006.15222.cnf	0.1	0.02	0.08	0.06	0.04	0.02	0.06	0.2	0.26	0.28	0.08	0.34	0.04	0.34	0.04	0.06	0.2	0.08	0.02	0.78
SWGCP_only_5000/SWlin2006.15223.cnf	0.2	0.34	0.08	0.1	0.34	0.28	0.1	0.3	0.28	0.36	0.08	0.42	0.44	0.36	0.08	0.4	0.2	0.08	0.68	1.22
SWGCP_only_5000/SWlin2006.15224.cnf	0.28	0.28	0.1	0.12	0.4	0.4	0.14	0.32	0.48	0.48	0.14	0.52	1.04	0.5	0.1	0.5	0.3	0.1	0.82	1.92
SWGCP_only_5000/SWlin2006.15225.cnf	0.16	0.34	0.06	0.06	0.24	0.18	0.08	0.2	0.26	0.22	0.08	0.34	0.44	0.3	0.08	0.28	0.16	0.06	0.46	0.74
SWGCP_only_5000/SWlin2006.15226.cnf	0.14	0.38	0.04	0.06	0.22	0.22	0.08	0.18	0.28	0.26	0.06	0.34	0.46	0.32	0.08	0.26	0.14	0.08	0.42	0.68
SWGCP_only_5000/SWlin2006.15227.cnf	0.18	0.36	0.08	0.08	0.28	0.28	0.1	0.24	0.4	0.28	0.1	0.44	0.58	0.3	0.08	0.3	0.18	0.12	0.64	1.08
SWGCP_only_5000/SWlin2006.15228.cnf	0.26	0.52	0.1	0.12	0.54	0.46	0.1	0.38	0.1	0.42	0.12	0.52	0.68	0.64	0.1	0.62	0.3	0.12	0.96	1.96
SWGCP_only_5000/SWlin2006.15229.cnf	0.14	0.18	0.06	0.08	0.24	0.24	0.08	0.24	0.2	0.22	0.08	0.34	0.22	0.2	0.06	0.34	0.12	0.1	0.48	0.96
SWGCP_only_5000/SWlin2006.15230.cnf	0.14	0.38	0.08	0.06	0.26	0.22	0.08	0.2	0.32	0.24	0.08	0.36	0.38	0.24	0.04	0.28	0.18	0.08	0.52	0.72
SWGCP_only_5000/SWlin2006.15231.cnf	0.2	0.44	0.06	0.08	0.28	0.26	0.08	0.2	0.36	0.3	0.06	0.36	0.54	0.38	0.08	0.32	0.2	0.08	0.58	0.82
SWGCP_only_5000/SWlin2006.15232.cnf	0.16	0.08	0.08	0.1	0.42	0.38	0.12	0.4	0.54	0.34	0.12	0.46	0.94	0.24	0.1	0.1	0.28	0.1	0.92	1.58
SWGCP_only_5000/SWlin2006.15233.cnf	0.04	0.2	0.06	0.08	0.36	0.3	0.1	0.3	0.32	0.36	0.1	0.52	0.78	0.5	0.1	0.38	0.22	0.12	0.52	1.14
SWGCP_only_5000/SWlin2006.15234.cnf	0.24	0.26	0.08	0.12	0.38	0.36	0.12	0.3	0.34	0.32	0.12	0.44	0.44	0.32	0.1	0.42	0.22	0.1	0.7	1.56
SWGCP_only_5000/SWlin2006.15235.cnf	0.14	0.28	0.04	0.04	0.22	0.18	0.06	0.2	0.22	0.22	0.06	0.26	0.34	0.26	0.06	0.24	0.16	0.08	0.38	0.64
SWGCP_only_5000/SWlin2006.15236.cnf	0.02	0.02	0.06	0.08	0.08	0.16	0.06	0.02	0.04	0.24	0.06	0.08	0.04	0.36	0.06	0.28	0.08	0.08	0.06	0.68
SWGCP_only_5000/SWlin2006.15237.cnf	0.28	0.68	0.1	0.12	0.52	0.48	0.12	0.22	0.5	0.44	0.12	0.82	1.02	0.74	0.12	0.46	0.28	0.12	0.98	1.78
SWGCP_only_5000/SWlin2006.15238.cnf	0.18	0.52	0.08	0.08	0.38	0.32	0.1	0.32	0.48	0.34	0.12	0.58	0.48	0.5	0.08	0.44	0.26	0.1	0.84	1.22
SWGCP_only_5000/SWlin2006.15239.cnf	0.1	0.5	0.06	0.08	0.08	0.24	0.08	0.18	0.0	0.24	0.08	0.38	0.58	0.12	0.08	0.3	0.18	0.06	0.5	0.76
SWGCP_only_5000/SWlin2006.15240.cnf	0.22	0.3	0.08	0.1	0.38	0.36	0.08	0.28	0.36	0.38	0.1	0.5	0.32	0.3	0.1	0.5	0.2	0.14	0.92	1.5
SWGCP_only_5000/SWlin2006.15241.cnf	0.14	0.2	0.06	0.1	0.24	0.26	0.08	0.22	0.22	0.32	0.1	0.36	0.26	0.24	0.06	0.3	0.16	0.08	0.54	0.96
SWGCP_only_5000/SWlin2006.15242.cnf	0.22	0.44	0.08	0.08	0.26	0.3	0.12	0.28	0.4	0.36	0.1	0.52	0.5	0.38	0.1	0.46	0.22	0.1	0.88	1.4
SWGCP_only_5000/SWlin2006.15243.cnf	0.18	0.3	0.06	0.08	0.28	0.22	0.1	0.26	0.24	0.3	0.1	0.4	0.56	0.34	0.08	0.36	0.2	0.08	0.4	0.86
SWGCP_only_5000/SWlin2006.15244.cnf	0.2	0.3	0.12	0.08	0.32	0.3	0.08	0.24	0.34	0.36	0.1	0.36	0.56	0.42	0.06	0.38	0.24	0.1	0.6	1.28
SWGCP_only_5000/SWlin2006.15245.cnf	0.28	0.84	0.1	0.1	0.16	0.36	0.12	0.36	0.22	0.4	0.12	0.64	0.42	0.56	0.1	0.56	0.3	0.08	0.8	1.7
SWGCP_only_5000/SWlin2006.15246.cnf	0.16	0.38	0.06	0.06	0.18	0.2	0.08	0.18	0.26	0.2	0.08	0.3	0.42	0.28	0.08	0.28	0.14	0.06	0.46	0.6
SWGCP_only_5000/SWlin2006.15247.cnf	0.2	0.64	0.1	0.1	0.34	0.4	0.12	0.32	0.32	0.36	0.1	0.44	0.62	0.4	0.08	0.38	0.3	0.12	0.96	1.6
SWGCP_only_5000/SWlin2006.15248.cnf	0.24	0.94	0.08	0.14	0.4	0.38	0.12	0.46	0.5	0.4	0.12	0.64	0.88	0.62	0.12	0.48	0.34	0.12	0.96	1.92
SWGCP_only_5000/SWlin2006.15249.cnf	0.22	0.52	0.1	0.1	0.4	0.28	0.12	0.36	0.16	0.38	0.12	0.52	0.82	0.56	0.12	0.22	0.28	0.12	0.86	1.56
SWGCP_only_5000/SWlin2006.15250.cnf	0.1	0.3	0.08	0.08	0.32	0.34	0.12	0.18	0.06	0.34	0.12	0.5	0.72	0.46	0.1	0.44	0.26	0.1	0.74	1.36
SWGCP_only_5000/SWlin2006.15251.cnf	0.26	0.38	0.12	0.12	0.42	0.32	0.14	0.36	0.42	0.38	0.12	0.54	0.54	0.4	0.1	0.48	0.26	0.12	0.72	1.9
SWGCP_only_5000/SWlin2006.15252.cnf	0.22	0.4	0.1	0.1	0.32	0.34	0.1	0.32	0.3	0.34	0.14	0.54	0.46	0.38	0.12	0.48	0.28	0.08	0.76	1.5
SWGCP_only_5000/SWlin2006.15253.cnf	0.2	0.04	0.08	0.08	0.18	0.32	0.08	0.28	0.42	0.36	0.08	0.46	0.52	0.36	0.06	0.24	0.1	0.08	0.62	1.04
SWGCP_only_5000/SWlin2006.15254.cnf	0.2	0.5	0.06	0.08	0.3	0.36	0.1	0.3	0.44	0.34	0.12	0.48	0.72	0.38	0.08	0.46	0.22	0.1	0.58	1.16
SWGCP_only_5000/SWlin2006.15255.cnf	0.06	0.1	0.06	0.06	0.2	0.02	0.1	0.2	0.02	0.26	0.08	0.08	0.12	0.06	0.06	0.16	0.04	0.08	0.18	0.8
SWGCP_only_5000/SWlin2006.15256.cnf	0.02	0.04	0.04	0.06	0.02	0.06	0.02	0.04	0.24	0.2	0.06	0.0	0.06	0.04	0.06	0.0	0.06	0.06	0.04	0.6
SWGCP_only_5000/SWlin2006.15257.cnf	0.24	0.66	0.08	0.12	0.44	0.44	0.12	0.32	0.52	0.12	0.12	0.56	0.38	0.32	0.1	0.54	0.3	0.12	0.66	1.6
SWGCP_only_5000/SWlin2006.15258.cnf	0.26	0.42	0.1	0.1	0.36	0.46	0.12	0.42	0.46	0.48	0.14	0.58	0.6	0.54	0.1	0.44	0.22	0.12	0.84	1.9
SWGCP_only_5000/SWlin2006.15259.cnf	0.1	0.16	0.06	0.06	0.16	0.16	0.06	0.12	0.16	0.16	0.06	0.22	0.22	0.16	0.06	0.18	0.12	0.06	0.3	0.46
SWGCP_only_5000/SWlin2006.15260.cnf	0.28	0.46	0.1	0.12	0.48	0.38	0.12	0.36	0.66	0.42	0.16	0.76	0.36	0.68	0.14	0.42	0.3	0.12	1.16	1.84
SWGCP_only_5000/SWlin2006.15261.cnf	0.14	0.26	0.06	0.06	0.22	0.16	0.08	0.18	0.22	0.2	0.06	0.28	0.3	0.26	0.06	0.22	0.12	0.08	0.38	0.6
SWGCP_only_5000/SWlin2006.15262.cnf	0.02	0.0	0.04	0.06	0.0	0.0	0.02	0.18	0.0	0.0	0.08	0.0	0.0	0.0	0.02	0.0	0.02	0.06	0.38	0.5
SWGCP_only_5000/SWlin2006.15263.cnf	0.12	0.16	0.04	0.04	0.2	0.2	0.06	0.16	0.16	0.18	0.1	0.28	0.2	0.14	0.06	0.24	0.12	0.06	0.42	0.66
SWGCP_only_5000/SWlin2006.15264.cnf	0.3	0.92	0.1	0.12	0.46	0.42	0.14	0.44	0.5	0.42	0.14	0.6	0.62	0.58	0.1	0.62	0.28	0.12	0.8	1.86
SWGCP_only_5000/SWlin2006.15265.cnf	0.2	0.56	0.08	0.06	0.3	0.28	0.08	0.22	0.3	0.24	0.1	0.42	0.46	0.34	0.08	0.38	0.18	0.1	0.68	1.0
SWGCP_only_5000/SWlin2006.15266.cnf	0.12	0.32	0.06	0.04	0.14	0.16	0.08	0.14	0.18	0.16	0.08	0.26	0.36	0.24	0.04	0.22	0.14	0.06	0.32	0.46
SWGCP_only_5000/SWlin2006.15267.cnf	0.18	0.52	0.06	0.08	0.26	0.24	0.08	0.22	0.38	0.32	0.08	0.46	0.64	0.34	0.08	0.36	0.2	0.08	0.56	0.86
SWGCP_only_5000/SWlin2006.15268.cnf	0.28	0.62	0.08	0.1	0.42	0.38	0.12	0.42	0.56	0.38	0.12	0.64	0.66	0.54	0.1	0.5	0.3	0.12	1.08	1.68
SWGCP_only_5000/SWlin2006.15269.cnf	0.18	0.54	0.1	0.1	0.34	0.4	0.08	0.3	0.34	0.36	0.12	0.62	0.74	0.08	0.08	0.2	0.24	0.12	0.38	1.3
SWGCP_only_5000/SWlin2006.15270.cnf	0.16	0.26	0.06	0.06	0.22	0.24	0.08	0.2	0.24	0.28	0.08	0.4	0.38	0.36	0.06	0.36	0.18	0.1	0.44	0.98
SWGCP_only_5000/SWlin2006.15271.cnf	0.24	0.48	0.08	0.08	0.36	0.06	0.1	0.3	0.1	0.38	0.12	0.42	0.08	0.52	0.1	0.48	0.1	0.1	0.58	1.36
SWGCP_only_5000/SWlin2006.15272.cnf	0.18	0.58	0.06	0.06	0.32	0.32	0.1	0.28	0.4	0.3	0.12	0.46	0.66	0.46	0.08	0.4	0.22	0.08	0.74	1.02
SWGCP_only_5000/SWlin2006.15273.cnf	0.22	0.74	0.1	0.1	0.32	0.34	0.1	0.32	0.46	0.42	0.12	0.34	0.8	0.6	0.1	0.42	0.22	0.1	0.82	1.34
SWGCP_only_5000/SWlin2006.15274.cnf	0.24	0.28	0.08	0.1	0.38	0.36	0.12	0.32	0.36	0.32	0.12	0.42	0.66	0.42	0.08	0.46	0.26	0.1	0.56	1.4
SWGCP_only_5000/SWlin2006.15275.cnf	0.12	0.24	0.06	0.04	0.16	0.16	0.08	0.14	0.18	0.14	0.06	0.22	0.28	0.18	0.04	0.18	0.1	0.06	0.32	0.42
SWGCP_only_5000/SWlin2006.15276.cnf	0.2	0.64	0.08	0.08	0.32	0.12	0.08	0.26	0.1	0.32	0.08	0.42	0.46	0.34	0.08	0.42	0.08	0.1	0.74	1.0
SWGCP_only_5000/SWlin2006.15277.cnf	0.26	0.48	0.08	0.12	0.36	0.42	0.12	0.28	0.4	0.3	0.14	0.56	0.54	0.52	0.1	0.5	0.34	0.12	1.14	1.78
SWGCP_only_5000/SWlin2006.15278.cnf	0.2	0.72	0.08	0.1	0.32	0.32	0.12	0.32	0.1	0.34	0.1	0.6	0.24	0.5	0.1	0.52	0.26	0.12	0.74	1.28
SWGCP_only_5000/SWlin2006.15279.cnf	0.12	0.24	0.04	0.06	0.14	0.14	0.06	0.14	0.14	0.16	0.06	0.24	0.26	0.18	0.06	0.2	0.12	0.08	0.32	0.48
SWGCP_only_5000/SWlin2006.15280.cnf	0.28	0.98	0.08	0.12	0.5	0.5	0.14	0.4	0.18	0.52	0.12	0.58	0.84	0.38	0.12	0.56	0.26	0.12	1.06	1.96
SWGCP_only_5000/SWlin2006.15281.cnf	0.16	0.42	0.06	0.06	0.24	0.22	0.06	0.18	0.3	0.24	0.08	0.38	0.52	0.3	0.04	0.3	0.18	0.06	0.52	0.72
SWGCP_only_5000/SWlin2006.15282.cnf	0.18	0.58	0.1	0.08	0.3	0.26	0.08	0.26	0.28	0.3	0.08	0.42	0.66	0.44	0.06	0.32	0.22	0.1	0.56	0.92
SWGCP_only_5000/SWlin2006.15283.cnf	0.12	0.26	0.06	0.04	0.16	0.12	0.06	0.16	0.2	0.16	0.06	0.24	0.3	0.18	0.06	0.2	0.12	0.06	0.36	0.48
SWGCP_only_5000/SWlin2006.15284.cnf	0.18	0.08	0.06	0.06	0.28	0.3	0.1	0.28	0.42	0.28	0.1	0.48	0.7	0.08	0.1	0.36	0.1	0.08	0.7	1.04
SWGCP_only_5000/SWlin2006.15285.cnf	0.22	0.46	0.1	0.08	0.36	0.28	0.12	0.34	0.34	0.32	0.12	0.56	0.64	0.46	0.08	0.5	0.28	0.12	0.78	1.66
SWGCP_only_5000/SWlin2006.15286.cnf	0.1	0.34	0.06	0.04	0.2	0.16	0.06	0.16	0.24	0.18	0.06	0.28	0.38	0.22	0.04	0.26	0.16	0.06	0.36	0.58
SWGCP_only_5000/SWlin2006.15287.cnf	0.16	0.4	0.06	0.06	0.24	0.2	0.08	0.22	0.28	0.18	0.12	0.3	0.5	0.22	0.06	0.28	0.18	0.08	0.46	0.72
SWGCP_only_5000/SWlin2006.15288.cnf	0.18	0.26	0.08	0.08	0.24	0.24	0.06	0.22	0.3	0.22	0.08	0.38	0.34	0.28	0.08	0.32	0.18	0.08	0.48	0.86
SWGCP_only_5000/SWlin2006.15289.cnf	0.3	0.54	0.1	0.12	0.52	0.4	0.12	0.32	0.48	0.34	0.14	0.58	0.84	0.8	0.12	0.54	0.36	0.12	0.74	1.88
SWGCP_only_5000/SWlin2006.15290.cnf	0.16	0.4	0.04	0.06	0.24	0.22	0.1	0.22	0.34	0.24	0.1	0.42	0.46	0.32	0.06	0.32	0.18	0.08	0.58	0.76
SWGCP_only_5000/SWlin2006.15291.cnf	0.14	0.24	0.08	0.04	0.22	0.22	0.06	0.2	0.22	0.24	0.08	0.26	0.3	0.26	0.06	0.26	0.18	0.08	0.38	0.8
SWGCP_only_5000/SWlin2006.15292.cnf	0.16	0.5	0.08	0.08	0.34	0.32	0.1	0.26	0.32	0.36	0.1	0.5	0.88	0.32	0.1	0.42	0.2	0.1	0.72	1.3
SWGCP_only_5000/SWlin2006.15293.cnf	0.18	0.32	0.08	0.08	0.08	0.26	0.08	0.26	0.2	0.06	0.08	0.48	0.72	0.08	0.1	0.38	0.2	0.08	0.38	0.98
SWGCP_only_5000/SWlin2006.15294.cnf	0.28	0.32	0.1	0.12	0.46	0.38	0.12	0.36	0.5	0.42	0.14	0.62	0.18	0.38	0.1	0.56	0.16	0.1	0.58	1.64
SWGCP_only_5000/SWlin2006.15295.cnf	0.12	0.4	0.06	0.06	0.22	0.2	0.08	0.18	0.26	0.22	0.08	0.32	0.48	0.32	0.06	0.26	0.16	0.06	0.48	0.6
SWGCP_only_5000/SWlin2006.15296.cnf	0.18	0.08	0.06	0.04	0.26	0.24	0.1	0.26	0.36	0.26	0.06	0.42	0.04	0.32	0.04	0.06	0.22	0.08	0.6	0.86
SWGCP_only_5000/SWlin2006.15297.cnf	0.04	0.5	0.06	0.08	0.06	0.12	0.08	0.04	0.38	0.26	0.1	0.42	0.6	0.06	0.08	0.34	0.22	0.1	0.24	0.92
SWGCP_only_5000/SWlin2006.15298.cnf	0.2	0.6	0.1	0.1	0.34	0.36	0.1	0.34	0.44	0.34	0.1	0.6	0.94	0.54	0.1	0.44	0.3	0.1	0.78	1.44
SWGCP_only_5000/SWlin2006.15299.cnf	0.18	0.54	0.08	0.08	0.26	0.26	0.08	0.26	0.36	0.3	0.1	0.44	0.66	0.34	0.08	0.34	0.2	0.08	0.68	0.92
SWGCP_only_5000/SWlin2006.15300.cnf	0.26	0.66	0.1	0.12	0.38	0.4	0.12	0.42	0.54	0.52	0.14	0.5	0.92	0.62	0.12	0.46	0.26	0.1	0.8	1.74
SWGCP_only_5000/SWlin2006.15301.cnf	0.26	0.32	0.12	0.1	0.36	0.34	0.12	0.38	0.58	0.44	0.12	0.1	0.6	0.58	0.08	0.44	0.36	0.1	1.12	1.7
SWGCP_only_5000/SWlin2006.15302.cnf	0.2	0.42	0.08	0.08	0.3	0.3	0.1	0.3	0.44	0.32	0.1	0.38	0.64	0.38	0.08	0.4	0.24	0.1	0.62	1.08
SWGCP_only_5000/SWlin2006.15303.cnf	0.22	0.14	0.08	0.06	0.3	0.32	0.12	0.34	0.38	0.28	0.12	0.62	0.42	0.4	0.08	0.36	0.2	0.1	0.84	1.22
SWGCP_only_5000/SWlin2006.15304.cnf	0.16	0.38	0.06	0.06	0.22	0.22	0.08	0.2	0.3	0.22	0.06	0.38	0.54	0.28	0.06	0.34	0.18	0.08	0.54	0.76
SWGCP_only_5000/SWlin2006.15305.cnf	0.18	0.02	0.08	0.08	0.34	0.26	0.08	0.26	0.42	0.32	0.1	0.54	0.5	0.48	0.08	0.42	0.26	0.1	0.18	1.06
SWGCP_only_5000/SWlin2006.15306.cnf	0.12	0.32	0.04	0.06	0.2	0.2	0.06	0.16	0.24	0.18	0.08	0.3	0.38	0.28	0.06	0.26	0.16	0.08	0.46	0.56
SWGCP_only_5000/SWlin2006.15307.cnf	0.1	0.32	0.06	0.04	0.16	0.16	0.08	0.16	0.22	0.16	0.04	0.26	0.38	0.24	0.06	0.22	0.14	0.08	0.38	0.48
SWGCP_only_5000/SWlin2006.15308.cnf	0.1	0.26	0.06	0.04	0.16	0.14	0.08	0.14	0.18	0.12	0.04	0.22	0.28	0.22	0.04	0.18	0.1	0.06	0.32	0.42
SWGCP_only_5000/SWlin2006.15309.cnf	0.28	0.4	0.1	0.12	0.4	0.38	0.14	0.42	0.68	0.36	0.14	0.7	0.76	0.68	0.12	0.42	0.3	0.1	0.2	1.82
SWGCP_only_5000/SWlin2006.15310.cnf	0.18	0.28	0.04	0.06	0.2	0.2	0.06	0.2	0.24	0.22	0.08	0.28	0.36	0.28	0.04	0.26	0.14	0.08	0.44	0.68
SWGCP_only_5000/SWlin2006.15311.cnf	0.18	0.24	0.08	0.08	0.36	0.32	0.08	0.26	0.24	0.32	0.1	0.5	0.26	0.24	0.08	0.42	0.18	0.1	0.72	1.28
SWGCP_only_5000/SWlin2006.15312.cnf	0.02	0.0	0.04	0.06	0.02	0.0	0.02	0.02	0.0	0.0	0.04	0.0	0.02	0.0	0.04	0.0	0.0	0.08	0.16	0.44
SWGCP_only_5000/SWlin2006.15313.cnf	0.22	0.46	0.1	0.1	0.36	0.34	0.14	0.22	0.68	0.38	0.1	0.56	0.62	0.16	0.1	0.48	0.24	0.12	0.68	1.74
SWGCP_only_5000/SWlin2006.15314.cnf	0.14	0.38	0.08	0.06	0.34	0.38	0.12	0.16	0.58	0.1	0.1	0.38	0.86	0.26	0.08	0.3	0.24	0.1	0.64	1.4
SWGCP_only_5000/SWlin2006.15315.cnf	0.2	0.02	0.04	0.06	0.12	0.28	0.08	0.02	0.3	0.04	0.1	0.08	0.12	0.04	0.08	0.36	0.1	0.08	0.5	0.96
SWGCP_only_5000/SWlin2006.15316.cnf	0.14	0.28	0.06	0.08	0.22	0.24	0.08	0.2	0.26	0.22	0.08	0.4	0.46	0.32	0.06	0.3	0.18	0.08	0.58	0.78
SWGCP_only_5000/SWlin2006.15317.cnf	0.08	0.14	0.04	0.04	0.16	0.12	0.06	0.14	0.14	0.16	0.06	0.2	0.18	0.16	0.06	0.14	0.08	0.08	0.28	0.48
SWGCP_only_5000/SWlin2006.15318.cnf	0.34	0.1	0.1	0.12	0.46	0.5	0.14	0.34	0.58	0.42	0.14	0.46	0.94	0.66	0.1	0.68	0.32	0.12	1.04	1.96
SWGCP_only_5000/SWlin2006.15319.cnf	0.22	0.06	0.1	0.06	0.36	0.32	0.1	0.32	0.4	0.3	0.1	0.08	0.58	0.42	0.08	0.06	0.08	0.08	0.6	1.2
SWGCP_only_5000/SWlin2006.15320.cnf	0.04	0.0	0.06	0.06	0.24	0.24	0.06	0.22	0.02	0.26	0.1	0.4	0.08	0.08	0.06	0.3	0.06	0.06	0.52	0.74
SWGCP_only_5000/SWlin2006.15321.cnf	0.2	0.1	0.08	0.1	0.38	0.16	0.12	0.4	0.06	0.42	0.12	0.06	0.9	0.6	0.08	0.4	0.28	0.12	0.88	1.54
SWGCP_only_5000/SWlin2006.15322.cnf	0.26	0.6	0.1	0.1	0.06	0.44	0.1	0.12	0.6	0.44	0.12	0.7	0.9	0.16	0.06	0.48	0.32	0.1	0.52	1.74
SWGCP_only_5000/SWlin2006.15323.cnf	0.18	0.3	0.08	0.06	0.26	0.22	0.1	0.24	0.26	0.26	0.1	0.3	0.4	0.3	0.06	0.3	0.18	0.08	0.5	0.86
SWGCP_only_5000/SWlin2006.15324.cnf	0.22	0.22	0.08	0.08	0.08	0.28	0.1	0.34	0.42	0.32	0.12	0.42	0.82	0.42	0.06	0.2	0.22	0.1	0.52	1.26
SWGCP_only_5000/SWlin2006.15325.cnf	0.0	0.0	0.06	0.06	0.02	0.02	0.06	0.02	0.0	0.02	0.04	0.02	0.08	0.04	0.06	0.18	0.04	0.08	0.3	0.54
SWGCP_only_5000/SWlin2006.15326.cnf	0.24	0.3	0.08	0.08	0.16	0.28	0.12	0.34	0.52	0.06	0.1	0.5	0.14	0.2	0.1	0.5	0.08	0.1	0.4	1.5
SWGCP_only_5000/SWlin2006.15327.cnf	0.26	0.76	0.12	0.1	0.5	0.42	0.14	0.32	0.42	0.4	0.12	0.64	0.9	0.68	0.1	0.5	0.28	0.12	1.02	1.82
SWGCP_only_5000/SWlin2006.15328.cnf	0.04	0.08	0.04	0.06	0.16	0.02	0.04	0.02	0.0	0.18	0.06	0.0	0.1	0.28	0.06	0.22	0.0	0.08	0.22	0.6
SWGCP_only_5000/SWlin2006.15329.cnf	0.28	0.9	0.1	0.1	0.38	0.42	0.12	0.34	0.1	0.12	0.14	0.48	0.84	0.56	0.12	0.52	0.28	0.12	0.78	1.66
SWGCP_only_5000/SWlin2006.15330.cnf	0.24	0.68	0.08	0.12	0.12	0.3	0.12	0.34	0.52	0.48	0.12	0.72	0.86	0.58	0.1	0.54	0.28	0.12	0.62	1.52
SWGCP_only_5000/SWlin2006.15331.cnf	0.14	0.42	0.06	0.06	0.22	0.2	0.08	0.2	0.32	0.24	0.08	0.32	0.54	0.34	0.06	0.3	0.18	0.08	0.54	0.72
SWGCP_only_5000/SWlin2006.15332.cnf	0.22	0.42	0.08	0.1	0.36	0.38	0.12	0.32	0.42	0.32	0.1	0.44	0.66	0.42	0.1	0.42	0.22	0.12	0.7	1.5
SWGCP_only_5000/SWlin2006.15333.cnf	0.2	0.56	0.08	0.1	0.42	0.34	0.12	0.28	0.52	0.32	0.1	0.1	0.14	0.6	0.08	0.54	0.2	0.1	0.84	1.36
SWGCP_only_5000/SWlin2006.15334.cnf	0.24	0.4	0.08	0.08	0.34	0.38	0.1	0.3	0.34	0.4	0.12	0.46	0.54	0.34	0.08	0.42	0.22	0.12	0.76	1.42
SWGCP_only_5000/SWlin2006.15335.cnf	0.16	0.2	0.06	0.06	0.24	0.22	0.08	0.22	0.22	0.22	0.08	0.32	0.22	0.16	0.08	0.26	0.14	0.08	0.4	0.82
SWGCP_only_5000/SWlin2006.15336.cnf	0.18	0.48	0.06	0.08	0.34	0.3	0.08	0.26	0.38	0.3	0.1	0.58	0.5	0.4	0.08	0.38	0.26	0.1	0.48	1.08
SWGCP_only_5000/SWlin2006.15337.cnf	0.28	0.5	0.1	0.14	0.44	0.38	0.14	0.42	0.38	0.4	0.12	0.62	0.64	0.5	0.1	0.58	0.34	0.1	1.28	1.9
SWGCP_only_5000/SWlin2006.15338.cnf	0.26	0.1	0.08	0.08	0.34	0.32	0.1	0.2	0.08	0.36	0.1	0.3	0.86	0.44	0.08	0.48	0.26	0.1	0.76	1.3
SWGCP_only_5000/SWlin2006.15339.cnf	0.26	0.34	0.1	0.1	0.42	0.34	0.12	0.34	0.3	0.34	0.16	0.62	0.48	0.48	0.12	0.52	0.32	0.12	0.86	1.92
SWGCP_only_5000/SWlin2006.15340.cnf	0.18	0.44	0.08	0.06	0.28	0.3	0.08	0.26	0.36	0.26	0.08	0.48	0.62	0.42	0.06	0.38	0.18	0.1	0.48	0.96
SWGCP_only_5000/SWlin2006.15341.cnf	0.28	0.32	0.1	0.1	0.44	0.48	0.12	0.4	0.62	0.46	0.12	0.56	0.9	0.62	0.12	0.5	0.34	0.12	1.0	1.84
SWGCP_only_5000/SWlin2006.15342.cnf	0.08	0.22	0.06	0.06	0.16	0.14	0.08	0.14	0.16	0.16	0.06	0.22	0.26	0.2	0.06	0.2	0.14	0.04	0.32	0.46
SWGCP_only_5000/SWlin2006.15343.cnf	0.14	0.08	0.06	0.06	0.28	0.26	0.08	0.1	0.08	0.22	0.1	0.46	0.64	0.4	0.08	0.32	0.2	0.08	0.5	0.88
SWGCP_only_5000/SWlin2006.15344.cnf	0.22	0.08	0.1	0.08	0.32	0.38	0.08	0.34	0.06	0.4	0.08	0.62	0.1	0.12	0.1	0.46	0.1	0.1	0.46	1.32
SWGCP_only_5000/SWlin2006.15345.cnf	0.1	0.22	0.04	0.06	0.16	0.16	0.04	0.12	0.16	0.16	0.06	0.2	0.28	0.2	0.04	0.18	0.12	0.06	0.32	0.44
SWGCP_only_5000/SWlin2006.15346.cnf	0.16	0.2	0.08	0.08	0.28	0.3	0.08	0.28	0.2	0.28	0.1	0.32	0.22	0.2	0.1	0.34	0.14	0.08	0.48	1.36
SWGCP_only_5000/SWlin2006.15347.cnf	0.26	0.1	0.1	0.1	0.42	0.4	0.1	0.4	0.52	0.4	0.14	0.26	0.28	0.56	0.12	0.5	0.3	0.1	1.02	1.66
SWGCP_only_5000/SWlin2006.15348.cnf	0.24	0.48	0.08	0.08	0.32	0.36	0.12	0.3	0.18	0.4	0.12	0.44	0.14	0.32	0.08	0.14	0.28	0.1	0.7	1.28
SWGCP_only_5000/SWlin2006.15349.cnf	0.16	0.3	0.06	0.06	0.3	0.26	0.08	0.2	0.34	0.28	0.08	0.36	0.54	0.4	0.08	0.3	0.18	0.08	0.52	0.9
SWGCP_only_5000/SWlin2006.15350.cnf	0.2	0.32	0.08	0.08	0.3	0.26	0.08	0.28	0.32	0.3	0.1	0.4	0.48	0.32	0.08	0.38	0.22	0.1	0.64	1.14
SWGCP_only_5000/SWlin2006.15351.cnf	0.28	0.48	0.1	0.1	0.36	0.32	0.1	0.16	0.32	0.46	0.1	0.1	0.88	0.4	0.1	0.5	0.22	0.12	0.88	1.54
SWGCP_only_5000/SWlin2006.15352.cnf	0.26	0.6	0.12	0.12	0.44	0.46	0.12	0.4	0.72	0.52	0.12	0.56	0.7	0.74	0.1	0.14	0.36	0.12	1.08	1.84
SWGCP_only_5000/SWlin2006.15353.cnf	0.26	0.98	0.1	0.1	0.54	0.44	0.1	0.44	0.5	0.42	0.12	0.72	0.78	0.6	0.1	0.54	0.26	0.14	0.7	1.94
SWGCP_only_5000/SWlin2006.15354.cnf	0.18	0.36	0.06	0.06	0.24	0.24	0.1	0.22	0.3	0.26	0.1	0.34	0.54	0.28	0.08	0.28	0.18	0.08	0.48	0.84
SWGCP_only_5000/SWlin2006.15355.cnf	0.28	0.72	0.1	0.12	0.12	0.38	0.12	0.22	0.6	0.5	0.14	0.66	0.12	0.58	0.12	0.46	0.28	0.12	0.62	1.88
SWGCP_only_5000/SWlin2006.15356.cnf	0.28	0.18	0.1	0.1	0.38	0.38	0.14	0.44	0.46	0.48	0.14	0.8	0.8	0.54	0.1	0.42	0.26	0.1	0.98	1.7
SWGCP_only_5000/SWlin2006.15357.cnf	0.16	0.24	0.06	0.06	0.08	0.12	0.08	0.12	0.0	0.04	0.08	0.06	0.1	0.24	0.08	0.04	0.06	0.06	0.44	0.82
SWGCP_only_5000/SWlin2006.15358.cnf	0.14	0.3	0.06	0.06	0.22	0.2	0.08	0.16	0.24	0.16	0.08	0.28	0.32	0.28	0.06	0.24	0.16	0.06	0.4	0.7
SWGCP_only_5000/SWlin2006.15359.cnf	0.24	0.36	0.1	0.08	0.38	0.14	0.1	0.32	0.5	0.1	0.14	0.62	0.86	0.12	0.1	0.46	0.3	0.1	0.86	1.48
SWGCP_only_5000/SWlin2006.15360.cnf	0.18	0.58	0.06	0.04	0.32	0.28	0.1	0.24	0.36	0.34	0.1	0.42	0.64	0.3	0.08	0.36	0.22	0.1	0.78	1.06
SWGCP_only_5000/SWlin2006.15361.cnf	0.14	0.02	0.06	0.06	0.1	0.08	0.08	0.18	0.32	0.02	0.04	0.3	0.0	0.14	0.04	0.3	0.02	0.08	0.52	0.66
SWGCP_only_5000/SWlin2006.15362.cnf	0.24	0.52	0.1	0.12	0.42	0.48	0.1	0.42	0.42	0.44	0.14	0.64	0.9	0.48	0.1	0.46	0.3	0.1	0.72	1.94
SWGCP_only_5000/SWlin2006.15363.cnf	0.24	0.28	0.1	0.1	0.42	0.26	0.12	0.36	0.4	0.42	0.14	0.54	0.9	0.6	0.08	0.44	0.32	0.1	0.76	1.58
SWGCP_only_5000/SWlin2006.15364.cnf	0.12	0.12	0.08	0.06	0.26	0.12	0.08	0.2	0.02	0.08	0.1	0.2	0.08	0.3	0.06	0.02	0.02	0.08	0.48	0.78
SWGCP_only_5000/SWlin2006.15365.cnf	0.16	0.2	0.04	0.08	0.22	0.22	0.06	0.2	0.3	0.0	0.08	0.1	0.48	0.34	0.06	0.32	0.18	0.08	0.4	0.74
SWGCP_only_5000/SWlin2006.15366.cnf	0.28	0.9	0.12	0.12	0.5	0.44	0.12	0.44	0.1	0.4	0.14	0.62	0.52	0.28	0.12	0.54	0.32	0.12	0.86	1.96
SWGCP_only_5000/SWlin2006.15367.cnf	0.14	0.38	0.06	0.06	0.18	0.22	0.06	0.18	0.0	0.02	0.08	0.32	0.1	0.02	0.06	0.26	0.02	0.06	0.46	0.6
SWGCP_only_5000/SWlin2006.15368.cnf	0.2	0.14	0.1	0.1	0.14	0.42	0.12	0.34	0.14	0.38	0.12	0.58	0.92	0.52	0.1	0.5	0.3	0.1	0.88	1.46
SWGCP_only_5000/SWlin2006.15369.cnf	0.04	0.02	0.06	0.06	0.2	0.08	0.08	0.02	0.0	0.18	0.06	0.02	0.08	0.06	0.04	0.2	0.02	0.08	0.34	0.5
SWGCP_only_5000/SWlin2006.15370.cnf	0.16	0.26	0.04	0.06	0.24	0.24	0.1	0.26	0.26	0.26	0.1	0.44	0.56	0.36	0.08	0.34	0.18	0.08	0.46	1.04
SWGCP_only_5000/SWlin2006.15371.cnf	0.16	0.22	0.06	0.08	0.22	0.24	0.08	0.18	0.24	0.22	0.1	0.28	0.26	0.24	0.06	0.28	0.16	0.08	0.52	0.9
SWGCP_only_5000/SWlin2006.15372.cnf	0.14	0.26	0.04	0.06	0.2	0.16	0.06	0.14	0.18	0.18	0.08	0.24	0.32	0.22	0.06	0.22	0.14	0.06	0.38	0.54
SWGCP_only_5000/SWlin2006.15373.cnf	0.24	0.6	0.1	0.12	0.44	0.38	0.12	0.4	0.5	0.5	0.14	0.72	0.7	0.72	0.12	0.5	0.28	0.12	0.88	1.96
SWGCP_only_5000/SWlin2006.15374.cnf	0.22	0.64	0.06	0.1	0.34	0.38	0.1	0.32	0.16	0.4	0.1	0.56	0.82	0.18	0.1	0.52	0.22	0.1	0.78	1.3
SWGCP_only_5000/SWlin2006.15375.cnf	0.14	0.36	0.06	0.06	0.18	0.18	0.06	0.16	0.26	0.2	0.06	0.32	0.42	0.28	0.06	0.24	0.16	0.08	0.42	0.52
SWGCP_only_5000/SWlin2006.15376.cnf	0.24	0.1	0.06	0.08	0.06	0.18	0.08	0.32	0.46	0.14	0.1	0.56	0.2	0.46	0.12	0.1	0.18	0.1	0.66	1.22
SWGCP_only_5000/SWlin2006.15377.cnf	0.24	0.76	0.08	0.08	0.32	0.3	0.12	0.28	0.52	0.36	0.1	0.44	0.78	0.42	0.1	0.48	0.24	0.08	0.78	1.32
SWGCP_only_5000/SWlin2006.15378.cnf	0.26	0.7	0.1	0.1	0.36	0.3	0.1	0.32	0.4	0.42	0.08	0.58	0.82	0.4	0.1	0.48	0.26	0.1	0.94	1.34
SWGCP_only_5000/SWlin2006.15379.cnf	0.26	0.84	0.1	0.12	0.42	0.4	0.12	0.4	0.62	0.34	0.14	0.82	0.64	0.14	0.12	0.66	0.18	0.1	0.82	1.82
SWGCP_only_5000/SWlin2006.15380.cnf	0.28	0.64	0.1	0.12	0.46	0.4	0.14	0.42	0.64	0.48	0.12	0.6	0.66	0.64	0.1	0.56	0.32	0.12	0.76	1.9
SWGCP_only_5000/SWlin2006.15381.cnf	0.18	0.18	0.06	0.06	0.22	0.02	0.08	0.24	0.18	0.1	0.1	0.34	0.02	0.22	0.08	0.36	0.16	0.08	0.12	0.84
SWGCP_only_5000/SWlin2006.15382.cnf	0.14	0.44	0.06	0.06	0.2	0.2	0.06	0.22	0.32	0.22	0.08	0.3	0.5	0.32	0.06	0.28	0.16	0.08	0.52	0.68
SWGCP_only_5000/SWlin2006.15383.cnf	0.06	0.6	0.08	0.1	0.1	0.36	0.1	0.32	0.08	0.34	0.12	0.44	0.36	0.42	0.08	0.44	0.26	0.12	0.86	1.24
SWGCP_only_5000/SWlin2006.15384.cnf	0.14	0.32	0.06	0.06	0.2	0.2	0.06	0.18	0.24	0.22	0.06	0.36	0.48	0.28	0.06	0.28	0.16	0.06	0.46	0.66
SWGCP_only_5000/SWlin2006.15385.cnf	0.14	0.22	0.06	0.06	0.18	0.18	0.06	0.18	0.2	0.2	0.08	0.3	0.36	0.24	0.06	0.24	0.14	0.08	0.42	0.58
SWGCP_only_5000/SWlin2006.15386.cnf	0.12	0.72	0.06	0.08	0.16	0.34	0.12	0.3	0.02	0.34	0.1	0.44	0.62	0.58	0.06	0.5	0.28	0.1	0.1	1.3
SWGCP_only_5000/SWlin2006.15387.cnf	0.18	0.68	0.06	0.08	0.28	0.3	0.08	0.28	0.44	0.26	0.1	0.5	0.66	0.1	0.1	0.42	0.24	0.1	0.82	1.1
SWGCP_only_5000/SWlin2006.15388.cnf	0.14	0.18	0.06	0.04	0.2	0.22	0.06	0.16	0.22	0.24	0.08	0.34	0.24	0.2	0.06	0.26	0.14	0.08	0.36	0.76
SWGCP_only_5000/SWlin2006.15389.cnf	0.24	0.92	0.1	0.1	0.34	0.4	0.12	0.4	0.46	0.44	0.12	0.66	1.14	0.68	0.12	0.58	0.34	0.1	0.94	1.78
SWGCP_only_5000/SWlin2006.15390.cnf	0.28	0.7	0.08	0.12	0.46	0.36	0.14	0.4	0.46	0.48	0.12	0.72	1.14	0.76	0.14	0.52	0.3	0.12	0.78	1.94
SWGCP_only_5000/SWlin2006.15391.cnf	0.02	0.26	0.06	0.06	0.2	0.22	0.02	0.14	0.26	0.2	0.02	0.0	0.04	0.3	0.06	0.0	0.02	0.08	0.02	0.58
SWGCP_only_5000/SWlin2006.15392.cnf	0.16	0.32	0.06	0.08	0.24	0.26	0.08	0.26	0.3	0.28	0.08	0.44	0.6	0.32	0.08	0.3	0.2	0.08	0.5	0.86
SWGCP_only_5000/SWlin2006.15393.cnf	0.1	0.34	0.04	0.06	0.18	0.18	0.06	0.16	0.22	0.18	0.06	0.26	0.38	0.24	0.06	0.24	0.12	0.06	0.36	0.48
SWGCP_only_5000/SWlin2006.15394.cnf	0.22	0.5	0.08	0.1	0.26	0.36	0.1	0.3	0.4	0.38	0.1	0.4	0.5	0.32	0.12	0.42	0.22	0.1	0.66	1.28
SWGCP_only_5000/SWlin2006.15395.cnf	0.26	0.64	0.1	0.12	0.22	0.36	0.12	0.3	0.4	0.4	0.12	0.56	0.86	0.46	0.1	0.56	0.26	0.08	0.8	1.54
SWGCP_only_5000/SWlin2006.15396.cnf	0.3	0.78	0.1	0.14	0.34	0.42	0.14	0.44	0.46	0.4	0.12	0.54	0.72	0.68	0.12	0.6	0.28	0.12	0.58	1.96
SWGCP_only_5000/SWlin2006.15397.cnf	0.1	0.16	0.04	0.06	0.14	0.12	0.06	0.1	0.14	0.14	0.04	0.18	0.16	0.14	0.06	0.16	0.1	0.06	0.26	0.42
SWGCP_only_5000/SWlin2006.15398.cnf	0.14	0.4	0.04	0.06	0.22	0.22	0.06	0.2	0.26	0.24	0.08	0.34	0.5	0.3	0.06	0.26	0.16	0.08	0.44	0.64
SWGCP_only_5000/SWlin2006.15399.cnf	0.14	0.3	0.06	0.06	0.2	0.2	0.08	0.2	0.24	0.24	0.08	0.28	0.34	0.22	0.04	0.24	0.14	0.04	0.46	0.68
SWGCP_only_5000/SWlin2006.15400.cnf	0.16	0.38	0.08	0.1	0.28	0.28	0.1	0.28	0.36	0.28	0.1	0.44	0.56	0.34	0.08	0.4	0.28	0.1	0.68	1.18
SWGCP_only_5000/SWlin2006.15401.cnf	0.26	0.64	0.08	0.08	0.36	0.32	0.12	0.32	0.38	0.36	0.12	0.5	0.86	0.42	0.08	0.48	0.26	0.1	0.68	1.34
SWGCP_only_5000/SWlin2006.15402.cnf	0.04	0.0	0.02	0.06	0.0	0.0	0.02	0.02	0.0	0.0	0.06	0.02	0.02	0.0	0.02	0.0	0.0	0.08	0.0	0.44
SWGCP_only_5000/SWlin2006.15403.cnf	0.26	0.6	0.1	0.12	0.46	0.4	0.12	0.42	0.38	0.44	0.12	0.5	1.14	0.5	0.1	0.6	0.3	0.12	0.62	1.78
SWGCP_only_5000/SWlin2006.15404.cnf	0.14	0.48	0.08	0.06	0.2	0.18	0.1	0.2	0.28	0.24	0.1	0.38	0.52	0.34	0.06	0.26	0.18	0.08	0.48	0.68
SWGCP_only_5000/SWlin2006.15405.cnf	0.2	0.66	0.1	0.08	0.34	0.34	0.08	0.3	0.46	0.38	0.1	0.56	0.06	0.24	0.08	0.08	0.14	0.1	0.74	1.1
SWGCP_only_5000/SWlin2006.15406.cnf	0.2	0.24	0.1	0.12	0.42	0.38	0.12	0.34	0.3	0.34	0.12	0.48	0.36	0.32	0.1	0.54	0.22	0.12	0.84	1.84
SWGCP_only_5000/SWlin2006.15407.cnf	0.2	0.46	0.08	0.08	0.34	0.3	0.1	0.32	0.44	0.38	0.1	0.16	0.72	0.04	0.08	0.12	0.24	0.1	0.84	1.18
SWGCP_only_5000/SWlin2006.15408.cnf	0.2	0.06	0.06	0.06	0.22	0.26	0.1	0.04	0.3	0.3	0.08	0.38	0.46	0.22	0.08	0.32	0.18	0.08	0.24	0.86
SWGCP_only_5000/SWlin2006.15409.cnf	0.2	0.82	0.08	0.1	0.34	0.32	0.12	0.36	0.46	0.36	0.14	0.62	0.48	0.38	0.08	0.54	0.28	0.1	0.7	1.72
SWGCP_only_5000/SWlin2006.15410.cnf	0.04	0.5	0.06	0.08	0.04	0.3	0.08	0.24	0.34	0.3	0.08	0.42	0.6	0.28	0.08	0.36	0.22	0.08	0.64	0.94
SWGCP_only_5000/SWlin2006.15411.cnf	0.26	0.36	0.08	0.08	0.34	0.36	0.1	0.38	0.4	0.4	0.1	0.56	0.64	0.38	0.12	0.52	0.32	0.12	0.7	1.66
SWGCP_only_5000/SWlin2006.15412.cnf	0.22	0.34	0.1	0.1	0.38	0.38	0.12	0.36	0.4	0.36	0.12	0.68	0.42	0.3	0.1	0.52	0.22	0.12	0.82	1.66
SWGCP_only_5000/SWlin2006.15413.cnf	0.24	0.22	0.08	0.1	0.34	0.34	0.14	0.3	0.52	0.46	0.1	0.48	0.56	0.44	0.1	0.52	0.28	0.1	0.58	1.6
SWGCP_only_5000/SWlin2006.15414.cnf	0.16	0.48	0.08	0.08	0.06	0.26	0.06	0.22	0.32	0.04	0.08	0.04	0.08	0.1	0.06	0.08	0.18	0.08	0.52	0.78
SWGCP_only_5000/SWlin2006.15415.cnf	0.24	0.74	0.1	0.08	0.34	0.4	0.1	0.3	0.36	0.38	0.1	0.44	0.62	0.42	0.08	0.52	0.24	0.12	0.54	1.42
SWGCP_only_5000/SWlin2006.15416.cnf	0.16	0.02	0.06	0.06	0.28	0.1	0.1	0.02	0.3	0.06	0.08	0.38	0.58	0.02	0.06	0.08	0.18	0.08	0.48	0.78
SWGCP_only_5000/SWlin2006.15417.cnf	0.16	0.4	0.08	0.1	0.3	0.24	0.08	0.28	0.34	0.34	0.08	0.36	0.54	0.46	0.08	0.38	0.2	0.1	0.6	0.98
SWGCP_only_5000/SWlin2006.15418.cnf	0.16	0.46	0.06	0.06	0.04	0.26	0.06	0.06	0.04	0.04	0.1	0.36	0.04	0.32	0.06	0.3	0.18	0.08	0.54	0.74
SWGCP_only_5000/SWlin2006.15419.cnf	0.16	0.36	0.04	0.06	0.2	0.16	0.08	0.18	0.28	0.22	0.08	0.1	0.08	0.04	0.08	0.08	0.08	0.06	0.42	0.64
SWGCP_only_5000/SWlin2006.15420.cnf	0.2	0.28	0.1	0.1	0.38	0.32	0.12	0.28	0.4	0.34	0.12	0.52	0.44	0.36	0.12	0.48	0.22	0.1	0.64	1.84
SWGCP_only_5000/SWlin2006.15421.cnf	0.16	0.2	0.06	0.06	0.24	0.26	0.08	0.24	0.24	0.22	0.08	0.38	0.32	0.26	0.08	0.32	0.16	0.1	0.52	0.98
SWGCP_only_5000/SWlin2006.15422.cnf	0.24	0.64	0.1	0.1	0.42	0.36	0.14	0.38	0.46	0.46	0.14	0.16	0.84	0.5	0.12	0.62	0.28	0.12	1.16	1.88
SWGCP_only_5000/SWlin2006.15423.cnf	0.02	0.0	0.06	0.04	0.02	0.04	0.08	0.0	0.0	0.0	0.04	0.0	0.04	0.0	0.06	0.18	0.02	0.08	0.06	0.5
SWGCP_only_5000/SWlin2006.15424.cnf	0.24	0.76	0.1	0.1	0.34	0.32	0.12	0.32	0.42	0.46	0.12	0.6	0.76	0.54	0.1	0.52	0.26	0.1	0.74	1.5
SWGCP_only_5000/SWlin2006.15425.cnf	0.18	0.3	0.06	0.06	0.24	0.22	0.08	0.2	0.22	0.24	0.1	0.34	0.5	0.28	0.08	0.28	0.18	0.08	0.4	0.74
SWGCP_only_5000/SWlin2006.15426.cnf	0.14	0.3	0.06	0.08	0.2	0.24	0.08	0.22	0.26	0.24	0.1	0.3	0.36	0.28	0.08	0.3	0.16	0.08	0.48	0.84
SWGCP_only_5000/SWlin2006.15427.cnf	0.22	0.78	0.06	0.08	0.36	0.32	0.1	0.32	0.4	0.36	0.12	0.54	0.58	0.5	0.1	0.52	0.3	0.1	0.94	1.44
SWGCP_only_5000/SWlin2006.15428.cnf	0.2	0.42	0.08	0.08	0.34	0.3	0.1	0.3	0.26	0.34	0.1	0.52	0.36	0.44	0.08	0.4	0.22	0.12	0.82	1.22
SWGCP_only_5000/SWlin2006.15429.cnf	0.2	0.22	0.06	0.08	0.32	0.3	0.08	0.26	0.28	0.3	0.1	0.44	0.24	0.2	0.08	0.4	0.16	0.12	0.62	1.14
SWGCP_only_5000/SWlin2006.15430.cnf	0.2	0.64	0.06	0.08	0.3	0.28	0.08	0.28	0.34	0.36	0.1	0.46	0.6	0.5	0.08	0.38	0.26	0.1	0.76	1.1
SWGCP_only_5000/SWlin2006.15431.cnf	0.06	0.4	0.04	0.06	0.06	0.22	0.08	0.2	0.28	0.26	0.06	0.34	0.04	0.04	0.06	0.3	0.16	0.1	0.5	0.68
SWGCP_only_5000/SWlin2006.15432.cnf	0.26	0.24	0.1	0.14	0.48	0.34	0.14	0.34	0.38	0.46	0.1	0.66	0.3	0.32	0.12	0.5	0.22	0.12	0.56	1.94
SWGCP_only_5000/SWlin2006.15433.cnf	0.3	0.9	0.1	0.16	0.38	0.4	0.12	0.38	0.56	0.34	0.16	0.78	0.88	0.56	0.12	0.44	0.32	0.12	0.9	2.0
SWGCP_only_5000/SWlin2006.15434.cnf	0.26	0.34	0.1	0.12	0.34	0.48	0.12	0.36	0.38	0.42	0.12	0.54	1.02	0.68	0.12	0.52	0.14	0.12	0.64	1.88
SWGCP_only_5000/SWlin2006.15435.cnf	0.16	0.16	0.08	0.06	0.2	0.22	0.08	0.2	0.02	0.24	0.08	0.38	0.08	0.32	0.06	0.3	0.16	0.08	0.44	0.72
SWGCP_only_5000/SWlin2006.15436.cnf	0.22	0.32	0.1	0.1	0.42	0.42	0.12	0.34	0.3	0.38	0.12	0.62	0.42	0.32	0.1	0.44	0.22	0.1	0.76	1.68
SWGCP_only_5000/SWlin2006.15437.cnf	0.06	0.04	0.08	0.06	0.08	0.08	0.08	0.06	0.3	0.02	0.06	0.06	0.02	0.02	0.06	0.06	0.02	0.06	0.06	0.64
SWGCP_only_5000/SWlin2006.15438.cnf	0.1	0.1	0.08	0.06	0.16	0.22	0.08	0.2	0.26	0.1	0.08	0.34	0.2	0.36	0.06	0.32	0.2	0.06	0.48	0.74
SWGCP_only_5000/SWlin2006.15439.cnf	0.28	0.62	0.1	0.1	0.36	0.3	0.12	0.4	0.36	0.42	0.12	0.56	0.58	0.66	0.12	0.5	0.32	0.12	0.96	1.8
SWGCP_only_5000/SWlin2006.15440.cnf	0.14	0.34	0.06	0.08	0.18	0.16	0.06	0.18	0.22	0.2	0.06	0.3	0.44	0.2	0.06	0.22	0.14	0.06	0.42	0.56
SWGCP_only_5000/SWlin2006.15441.cnf	0.22	0.6	0.1	0.1	0.44	0.44	0.12	0.36	0.44	0.34	0.16	0.52	0.4	0.52	0.1	0.5	0.28	0.1	0.78	1.96
SWGCP_only_5000/SWlin2006.15442.cnf	0.22	0.34	0.1	0.08	0.32	0.34	0.12	0.26	0.26	0.34	0.12	0.44	0.36	0.32	0.1	0.38	0.2	0.12	0.74	1.4
SWGCP_only_5000/SWlin2006.15443.cnf	0.14	0.3	0.06	0.06	0.2	0.18	0.08	0.16	0.24	0.24	0.08	0.28	0.36	0.26	0.08	0.24	0.14	0.08	0.42	0.66
SWGCP_only_5000/SWlin2006.15444.cnf	0.16	0.16	0.06	0.06	0.16	0.18	0.06	0.14	0.16	0.18	0.08	0.24	0.18	0.16	0.08	0.24	0.12	0.06	0.36	0.64
SWGCP_only_5000/SWlin2006.15445.cnf	0.22	0.7	0.1	0.1	0.38	0.36	0.1	0.4	0.5	0.4	0.12	0.5	0.88	0.6	0.1	0.46	0.34	0.1	0.74	1.5
SWGCP_only_5000/SWlin2006.15446.cnf	0.16	0.5	0.06	0.08	0.34	0.26	0.08	0.22	0.28	0.28	0.08	0.38	0.58	0.4	0.06	0.34	0.22	0.08	0.64	0.82
SWGCP_only_5000/SWlin2006.15447.cnf	0.18	0.46	0.1	0.1	0.38	0.34	0.08	0.28	0.48	0.38	0.1	0.54	0.6	0.4	0.08	0.46	0.26	0.12	0.76	1.22
SWGCP_only_5000/SWlin2006.15448.cnf	0.16	0.26	0.1	0.06	0.28	0.26	0.08	0.26	0.28	0.28	0.1	0.48	0.3	0.28	0.08	0.38	0.18	0.08	0.56	1.04
SWGCP_only_5000/SWlin2006.15449.cnf	0.14	0.18	0.06	0.06	0.2	0.18	0.06	0.18	0.18	0.2	0.08	0.26	0.26	0.18	0.06	0.2	0.14	0.06	0.4	0.54
SWGCP_only_5000/SWlin2006.15450.cnf	0.24	0.52	0.1	0.12	0.36	0.4	0.14	0.42	0.44	0.44	0.12	0.72	0.72	0.52	0.1	0.5	0.26	0.14	0.82	1.84
SWGCP_only_5000/SWlin2006.15451.cnf	0.24	0.52	0.1	0.1	0.38	0.34	0.1	0.3	0.08	0.4	0.1	0.56	0.62	0.58	0.1	0.42	0.28	0.1	0.96	1.36
SWGCP_only_5000/SWlin2006.15452.cnf	0.24	0.46	0.1	0.06	0.4	0.3	0.1	0.32	0.34	0.44	0.12	0.46	0.7	0.44	0.12	0.44	0.28	0.12	0.74	1.48
SWGCP_only_5000/SWlin2006.15453.cnf	0.26	0.16	0.12	0.12	0.48	0.44	0.12	0.4	0.58	0.54	0.12	0.16	0.54	0.2	0.1	0.62	0.32	0.12	1.14	1.94
SWGCP_only_5000/SWlin2006.15454.cnf	0.16	0.24	0.04	0.06	0.18	0.2	0.06	0.2	0.24	0.24	0.08	0.32	0.36	0.22	0.06	0.26	0.16	0.06	0.46	0.68
SWGCP_only_5000/SWlin2006.15455.cnf	0.26	0.78	0.08	0.1	0.3	0.36	0.12	0.3	0.48	0.38	0.1	0.48	0.5	0.46	0.1	0.44	0.26	0.1	0.8	1.46
SWGCP_only_5000/SWlin2006.15456.cnf	0.22	0.14	0.1	0.1	0.36	0.44	0.12	0.32	0.46	0.16	0.12	0.56	0.68	0.26	0.08	0.52	0.3	0.08	0.94	1.56
SWGCP_only_5000/SWlin2006.15457.cnf	0.18	0.7	0.1	0.08	0.34	0.28	0.1	0.12	0.5	0.06	0.1	0.12	0.84	0.46	0.08	0.12	0.28	0.1	0.78	1.22
SWGCP_only_5000/SWlin2006.15458.cnf	0.2	0.54	0.08	0.08	0.32	0.34	0.12	0.3	0.38	0.34	0.12	0.52	0.6	0.4	0.1	0.42	0.26	0.12	0.74	1.28
SWGCP_only_5000/SWlin2006.15459.cnf	0.2	0.64	0.06	0.08	0.3	0.28	0.08	0.32	0.34	0.26	0.1	0.48	0.56	0.4	0.1	0.38	0.24	0.08	0.78	1.14
SWGCP_only_5000/SWlin2006.15460.cnf	0.04	0.0	0.08	0.06	0.0	0.0	0.06	0.06	0.06	0.0	0.08	0.0	0.02	0.0	0.06	0.02	0.02	0.08	0.04	0.56
SWGCP_only_5000/SWlin2006.15461.cnf	0.26	0.58	0.1	0.12	0.44	0.48	0.12	0.34	0.58	0.5	0.14	0.6	1.08	0.52	0.12	0.6	0.28	0.1	0.96	1.9
SWGCP_only_5000/SWlin2006.15462.cnf	0.28	0.76	0.1	0.14	0.44	0.42	0.12	0.42	0.6	0.46	0.16	0.66	0.72	0.72	0.1	0.32	0.36	0.12	0.8	1.92
SWGCP_only_5000/SWlin2006.15463.cnf	0.16	0.28	0.04	0.06	0.16	0.18	0.06	0.16	0.24	0.18	0.08	0.26	0.36	0.24	0.04	0.2	0.14	0.08	0.36	0.52
SWGCP_only_5000/SWlin2006.15464.cnf	0.12	0.32	0.04	0.06	0.16	0.16	0.06	0.16	0.2	0.18	0.06	0.24	0.34	0.24	0.04	0.22	0.14	0.06	0.36	0.5
SWGCP_only_5000/SWlin2006.15465.cnf	0.12	0.26	0.06	0.06	0.18	0.18	0.06	0.14	0.2	0.16	0.08	0.24	0.36	0.24	0.06	0.22	0.12	0.08	0.36	0.56
SWGCP_only_5000/SWlin2006.15466.cnf	0.2	0.2	0.08	0.08	0.3	0.32	0.12	0.28	0.22	0.32	0.12	0.38	0.26	0.2	0.1	0.3	0.2	0.12	0.54	1.54
SWGCP_only_5000/SWlin2006.15467.cnf	0.18	0.14	0.08	0.08	0.3	0.12	0.08	0.06	0.02	0.14	0.08	0.02	0.28	0.44	0.08	0.36	0.22	0.06	0.68	0.94
SWGCP_only_5000/SWlin2006.15468.cnf	0.22	0.46	0.1	0.08	0.34	0.36	0.1	0.14	0.52	0.32	0.1	0.38	0.9	0.34	0.08	0.46	0.24	0.12	0.68	1.34
SWGCP_only_5000/SWlin2006.15469.cnf	0.16	0.02	0.08	0.06	0.26	0.04	0.08	0.24	0.06	0.16	0.08	0.18	0.04	0.02	0.04	0.22	0.2	0.08	0.52	0.84
SWGCP_only_5000/SWlin2006.15470.cnf	0.24	0.32	0.1	0.1	0.42	0.38	0.12	0.4	0.44	0.36	0.12	0.66	1.0	0.54	0.1	0.52	0.18	0.12	0.88	1.84
SWGCP_only_5000/SWlin2006.15471.cnf	0.2	0.44	0.1	0.08	0.38	0.38	0.1	0.2	0.36	0.38	0.1	0.34	0.44	0.14	0.1	0.48	0.28	0.1	0.64	1.3
SWGCP_only_5000/SWlin2006.15472.cnf	0.22	0.44	0.08	0.08	0.12	0.34	0.08	0.06	0.18	0.44	0.08	0.62	0.64	0.38	0.1	0.06	0.26	0.08	0.12	1.3
SWGCP_only_5000/SWlin2006.15473.cnf	0.14	0.52	0.06	0.08	0.32	0.26	0.1	0.26	0.32	0.34	0.1	0.44	0.6	0.04	0.1	0.42	0.2	0.08	0.58	1.02
SWGCP_only_5000/SWlin2006.15474.cnf	0.22	0.68	0.08	0.06	0.32	0.3	0.06	0.28	0.42	0.28	0.12	0.4	0.52	0.38	0.1	0.42	0.28	0.1	0.68	1.18
SWGCP_only_5000/SWlin2006.15475.cnf	0.14	0.22	0.06	0.06	0.28	0.26	0.08	0.22	0.3	0.28	0.1	0.42	0.3	0.26	0.06	0.3	0.16	0.06	0.38	0.86
SWGCP_only_5000/SWlin2006.15476.cnf	0.22	0.56	0.08	0.08	0.34	0.34	0.1	0.34	0.22	0.38	0.12	0.64	0.1	0.6	0.1	0.46	0.28	0.12	0.84	1.32
SWGCP_only_5000/SWlin2006.15477.cnf	0.24	0.28	0.1	0.08	0.32	0.3	0.08	0.3	0.36	0.36	0.12	0.2	0.06	0.4	0.08	0.28	0.08	0.08	0.22	1.14
SWGCP_only_5000/SWlin2006.15478.cnf	0.16	0.46	0.08	0.08	0.32	0.28	0.1	0.28	0.32	0.32	0.1	0.54	0.52	0.4	0.08	0.38	0.2	0.08	0.68	1.12
SWGCP_only_5000/SWlin2006.15479.cnf	0.22	0.66	0.1	0.08	0.34	0.08	0.12	0.32	0.48	0.42	0.1	0.6	0.26	0.58	0.1	0.34	0.24	0.1	0.86	1.38
SWGCP_only_5000/SWlin2006.15480.cnf	0.24	0.74	0.1	0.12	0.2	0.08	0.14	0.34	0.2	0.38	0.12	0.68	0.3	0.54	0.12	0.08	0.3	0.1	0.8	1.78
SWGCP_only_5000/SWlin2006.15481.cnf	0.26	0.56	0.1	0.1	0.44	0.44	0.1	0.44	0.44	0.42	0.12	0.62	0.72	0.7	0.12	0.5	0.34	0.12	0.96	1.88
SWGCP_only_5000/SWlin2006.15482.cnf	0.22	0.42	0.08	0.1	0.36	0.34	0.12	0.34	0.58	0.38	0.14	0.72	0.68	0.52	0.1	0.46	0.3	0.1	0.98	1.68
SWGCP_only_5000/SWlin2006.15483.cnf	0.2	0.7	0.08	0.08	0.34	0.34	0.1	0.34	0.52	0.34	0.12	0.62	0.96	0.56	0.1	0.5	0.2	0.1	0.76	1.42
SWGCP_only_5000/SWlin2006.15484.cnf	0.1	0.16	0.06	0.06	0.16	0.2	0.06	0.14	0.18	0.18	0.08	0.22	0.18	0.14	0.06	0.18	0.1	0.08	0.36	0.52
SWGCP_only_5000/SWlin2006.15485.cnf	0.22	0.48	0.08	0.08	0.36	0.32	0.1	0.32	0.38	0.38	0.1	0.38	0.54	0.38	0.08	0.4	0.26	0.1	0.72	1.38
SWGCP_only_5000/SWlin2006.15486.cnf	0.24	0.66	0.1	0.1	0.44	0.4	0.12	0.34	0.46	0.42	0.12	0.66	0.94	0.12	0.1	0.54	0.34	0.1	0.84	1.56
SWGCP_only_5000/SWlin2006.15487.cnf	0.2	0.74	0.08	0.1	0.36	0.4	0.1	0.32	0.44	0.32	0.1	0.56	0.54	0.18	0.1	0.44	0.3	0.1	0.78	1.56
SWGCP_only_5000/SWlin2006.15488.cnf	0.06	0.02	0.04	0.06	0.18	0.16	0.06	0.02	0.24	0.2	0.04	0.02	0.0	0.0	0.02	0.26	0.02	0.06	0.36	0.54
SWGCP_only_5000/SWlin2006.15489.cnf	0.28	0.46	0.12	0.12	0.38	0.5	0.14	0.32	0.52	0.38	0.12	0.72	0.88	0.52	0.12	0.48	0.36	0.12	1.0	1.94
SWGCP_only_5000/SWlin2006.15490.cnf	0.3	0.88	0.1	0.14	0.34	0.18	0.16	0.4	0.46	0.5	0.14	0.86	0.76	0.62	0.12	0.6	0.34	0.12	0.84	1.9
SWGCP_only_5000/SWlin2006.15491.cnf	0.14	0.34	0.04	0.06	0.2	0.18	0.06	0.14	0.26	0.22	0.08	0.3	0.42	0.24	0.08	0.24	0.16	0.06	0.44	0.56
SWGCP_only_5000/SWlin2006.15492.cnf	0.16	0.34	0.08	0.08	0.22	0.26	0.08	0.24	0.22	0.24	0.08	0.44	0.5	0.28	0.08	0.34	0.18	0.08	0.64	0.9
SWGCP_only_5000/SWlin2006.15493.cnf	0.16	0.36	0.06	0.06	0.24	0.24	0.08	0.2	0.28	0.22	0.08	0.28	0.42	0.26	0.06	0.26	0.16	0.08	0.42	0.74
SWGCP_only_5000/SWlin2006.15494.cnf	0.18	0.38	0.08	0.1	0.32	0.32	0.08	0.24	0.32	0.34	0.08	0.42	0.38	0.32	0.08	0.42	0.18	0.1	0.68	1.2
SWGCP_only_5000/SWlin2006.15495.cnf	0.06	0.04	0.04	0.06	0.26	0.18	0.04	0.2	0.32	0.04	0.08	0.38	0.02	0.04	0.08	0.18	0.06	0.08	0.12	0.7
SWGCP_only_5000/SWlin2006.15496.cnf	0.28	0.76	0.12	0.1	0.42	0.42	0.12	0.36	0.12	0.46	0.14	0.8	0.48	0.6	0.1	0.52	0.34	0.12	0.94	1.94
SWGCP_only_5000/SWlin2006.15497.cnf	0.12	0.26	0.08	0.06	0.18	0.18	0.06	0.16	0.22	0.16	0.06	0.2	0.24	0.26	0.06	0.18	0.12	0.06	0.32	0.5
SWGCP_only_5000/SWlin2006.15498.cnf	0.12	0.4	0.04	0.06	0.22	0.2	0.1	0.2	0.24	0.22	0.08	0.36	0.44	0.32	0.06	0.28	0.16	0.08	0.5	0.68
SWGCP_only_5000/SWlin2006.15499.cnf	0.12	0.4	0.06	0.06	0.2	0.22	0.04	0.22	0.3	0.22	0.1	0.34	0.42	0.32	0.06	0.26	0.14	0.06	0.38	0.62
SWGCP_only_5000/SWlin2006.15500.cnf	0.26	0.52	0.08	0.1	0.38	0.34	0.14	0.4	0.54	0.42	0.12	0.6	0.66	0.58	0.1	0.58	0.3	0.12	0.66	1.72
SWGCP_only_5000/SWlin2006.15501.cnf	0.24	0.58	0.1	0.1	0.28	0.32	0.12	0.3	0.38	0.44	0.12	0.6	0.54	0.4	0.1	0.44	0.32	0.1	0.76	1.74
SWGCP_only_5000/SWlin2006.15502.cnf	0.16	0.32	0.06	0.08	0.26	0.22	0.08	0.2	0.22	0.28	0.08	0.34	0.38	0.26	0.06	0.32	0.16	0.08	0.48	0.82
SWGCP_only_5000/SWlin2006.15503.cnf	0.26	0.36	0.1	0.12	0.4	0.38	0.12	0.34	0.34	0.32	0.14	0.52	0.46	0.4	0.12	0.52	0.24	0.1	0.58	1.78
SWGCP_only_5000/SWlin2006.15504.cnf	0.1	0.58	0.1	0.1	0.42	0.38	0.12	0.3	0.34	0.38	0.12	0.48	0.24	0.08	0.1	0.42	0.22	0.1	0.66	1.58
SWGCP_only_5000/SWlin2006.15505.cnf	0.22	0.38	0.1	0.1	0.3	0.3	0.1	0.28	0.44	0.38	0.12	0.62	0.7	0.46	0.08	0.48	0.24	0.12	0.6	1.38
SWGCP_only_5000/SWlin2006.15506.cnf	0.12	0.2	0.06	0.06	0.16	0.16	0.06	0.14	0.16	0.16	0.06	0.22	0.28	0.2	0.04	0.2	0.12	0.04	0.3	0.48
SWGCP_only_5000/SWlin2006.15507.cnf	0.22	0.7	0.08	0.1	0.38	0.38	0.08	0.28	0.5	0.4	0.12	0.5	0.16	0.56	0.1	0.48	0.1	0.1	0.76	1.4
SWGCP_only_5000/SWlin2006.15508.cnf	0.28	0.68	0.12	0.14	0.44	0.48	0.14	0.38	0.4	0.42	0.14	0.78	1.0	0.4	0.12	0.38	0.34	0.12	0.92	1.94
SWGCP_only_5000/SWlin2006.15509.cnf	0.12	0.02	0.06	0.06	0.22	0.22	0.06	0.02	0.02	0.04	0.06	0.14	0.06	0.0	0.06	0.04	0.06	0.08	0.14	0.7
SWGCP_only_5000/SWlin2006.15510.cnf	0.06	0.0	0.02	0.04	0.0	0.02	0.04	0.06	0.0	0.18	0.08	0.02	0.02	0.02	0.04	0.02	0.02	0.06	0.2	0.52
SWGCP_only_5000/SWlin2006.15511.cnf	0.08	0.04	0.06	0.06	0.28	0.28	0.02	0.26	0.38	0.18	0.1	0.38	0.14	0.04	0.06	0.34	0.02	0.06	0.66	0.92
SWGCP_only_5000/SWlin2006.15512.cnf	0.06	0.02	0.08	0.06	0.02	0.02	0.06	0.08	0.12	0.28	0.08	0.42	0.06	0.02	0.08	0.36	0.04	0.08	0.54	0.88
SWGCP_only_5000/SWlin2006.15513.cnf	0.22	0.42	0.08	0.14	0.36	0.34	0.14	0.36	0.56	0.44	0.16	0.82	0.16	0.64	0.12	0.48	0.32	0.12	0.94	1.96
SWGCP_only_5000/SWlin2006.15514.cnf	0.06	0.32	0.08	0.06	0.12	0.36	0.1	0.3	0.12	0.34	0.1	0.56	0.64	0.54	0.1	0.42	0.26	0.1	0.22	1.2
SWGCP_only_5000/SWlin2006.15515.cnf	0.14	0.42	0.06	0.06	0.2	0.2	0.08	0.2	0.26	0.2	0.06	0.3	0.48	0.28	0.06	0.28	0.16	0.08	0.46	0.6
SWGCP_only_5000/SWlin2006.15516.cnf	0.28	0.56	0.1	0.12	0.44	0.4	0.12	0.38	0.46	0.36	0.12	0.68	1.04	0.7	0.12	0.48	0.1	0.1	0.86	1.78
SWGCP_only_5000/SWlin2006.15517.cnf	0.2	0.26	0.08	0.08	0.3	0.26	0.1	0.04	0.3	0.28	0.1	0.42	0.08	0.12	0.08	0.44	0.1	0.08	0.66	1.0
SWGCP_only_5000/SWlin2006.15518.cnf	0.26	0.48	0.1	0.12	0.5	0.4	0.14	0.44	0.5	0.42	0.12	0.6	0.66	0.14	0.1	0.66	0.28	0.12	1.16	1.8
SWGCP_only_5000/SWlin2006.15519.cnf	0.14	0.2	0.08	0.1	0.34	0.34	0.12	0.34	0.12	0.32	0.1	0.6	0.48	0.34	0.1	0.48	0.26	0.1	0.9	1.26
SWGCP_only_5000/SWlin2006.15520.cnf	0.24	0.66	0.08	0.08	0.34	0.34	0.08	0.34	0.48	0.32	0.1	0.48	0.8	0.42	0.06	0.44	0.24	0.1	0.88	1.22
SWGCP_only_5000/SWlin2006.15521.cnf	0.2	0.3	0.1	0.1	0.36	0.4	0.1	0.34	0.18	0.48	0.12	0.56	0.46	0.34	0.1	0.54	0.32	0.08	0.38	1.58
SWGCP_only_5000/SWlin2006.15522.cnf	0.12	0.04	0.06	0.06	0.18	0.18	0.02	0.08	0.24	0.2	0.08	0.28	0.42	0.28	0.04	0.22	0.16	0.06	0.4	0.56
SWGCP_only_5000/SWlin2006.15523.cnf	0.26	0.34	0.1	0.1	0.34	0.46	0.1	0.38	0.4	0.38	0.1	0.52	0.62	0.48	0.1	0.48	0.3	0.1	0.68	1.68
SWGCP_only_5000/SWlin2006.15524.cnf	0.24	0.6	0.08	0.08	0.4	0.38	0.1	0.34	0.5	0.38	0.12	0.52	0.12	0.08	0.08	0.48	0.22	0.1	0.16	1.42
SWGCP_only_5000/SWlin2006.15525.cnf	0.26	0.58	0.1	0.12	0.4	0.42	0.14	0.36	0.56	0.34	0.14	0.48	0.52	0.48	0.08	0.58	0.26	0.1	1.18	1.78
SWGCP_only_5000/SWlin2006.15526.cnf	0.28	0.24	0.1	0.1	0.38	0.42	0.14	0.46	0.56	0.46	0.12	0.6	0.64	0.4	0.12	0.52	0.26	0.12	0.78	1.86
SWGCP_only_5000/SWlin2006.15527.cnf	0.12	0.34	0.08	0.06	0.08	0.04	0.06	0.16	0.1	0.22	0.06	0.08	0.38	0.02	0.06	0.0	0.06	0.06	0.44	0.56
SWGCP_only_5000/SWlin2006.15528.cnf	0.14	0.2	0.04	0.06	0.18	0.16	0.06	0.12	0.16	0.16	0.06	0.26	0.24	0.18	0.06	0.22	0.12	0.08	0.36	0.54
SWGCP_only_5000/SWlin2006.15529.cnf	0.16	0.2	0.06	0.08	0.28	0.28	0.08	0.28	0.26	0.26	0.1	0.42	0.24	0.22	0.08	0.36	0.16	0.1	0.58	1.06
SWGCP_only_5000/SWlin2006.15530.cnf	0.14	0.4	0.06	0.06	0.22	0.2	0.08	0.2	0.3	0.24	0.1	0.32	0.46	0.3	0.04	0.22	0.18	0.06	0.44	0.7
SWGCP_only_5000/SWlin2006.15531.cnf	0.06	0.22	0.06	0.08	0.36	0.28	0.1	0.32	0.12	0.32	0.12	0.6	0.44	0.42	0.1	0.5	0.3	0.08	0.74	1.28
SWGCP_only_5000/SWlin2006.15532.cnf	0.02	0.14	0.04	0.06	0.22	0.0	0.08	0.04	0.24	0.2	0.06	0.02	0.12	0.24	0.04	0.02	0.02	0.06	0.0	0.58
SWGCP_only_5000/SWlin2006.15533.cnf	0.12	0.38	0.06	0.06	0.22	0.18	0.06	0.2	0.26	0.22	0.06	0.32	0.44	0.28	0.04	0.24	0.18	0.06	0.46	0.64
SWGCP_only_5000/SWlin2006.15534.cnf	0.18	0.14	0.08	0.06	0.36	0.26	0.08	0.06	0.12	0.38	0.1	0.54	0.54	0.46	0.08	0.42	0.24	0.1	0.78	1.1
SWGCP_only_5000/SWlin2006.15535.cnf	0.12	0.2	0.04	0.06	0.16	0.16	0.06	0.14	0.16	0.16	0.08	0.24	0.26	0.18	0.06	0.2	0.12	0.06	0.28	0.44
SWGCP_only_5000/SWlin2006.15536.cnf	0.18	0.64	0.1	0.12	0.46	0.38	0.1	0.38	0.44	0.42	0.12	0.46	0.32	0.62	0.12	0.62	0.26	0.08	0.2	1.7
SWGCP_only_5000/SWlin2006.15537.cnf	0.1	0.52	0.06	0.06	0.2	0.28	0.08	0.2	0.26	0.3	0.08	0.46	0.6	0.08	0.08	0.36	0.14	0.08	0.64	0.94
SWGCP_only_5000/SWlin2006.15538.cnf	0.22	0.72	0.08	0.08	0.38	0.38	0.1	0.32	0.38	0.12	0.1	0.32	0.7	0.48	0.08	0.36	0.3	0.12	0.84	1.36
SWGCP_only_5000/SWlin2006.15539.cnf	0.14	0.42	0.1	0.12	0.4	0.42	0.12	0.34	0.16	0.34	0.12	0.16	0.98	0.48	0.08	0.5	0.12	0.12	0.76	1.54
SWGCP_only_5000/SWlin2006.15540.cnf	0.26	0.76	0.12	0.1	0.38	0.3	0.12	0.42	0.32	0.42	0.12	0.6	0.64	0.72	0.1	0.6	0.34	0.1	0.9	1.6
SWGCP_only_5000/SWlin2006.15541.cnf	0.06	0.06	0.06	0.08	0.1	0.1	0.06	0.22	0.0	0.04	0.1	0.1	0.04	0.18	0.06	0.14	0.1	0.06	0.18	0.82
SWGCP_only_5000/SWlin2006.15542.cnf	0.26	0.62	0.08	0.12	0.36	0.44	0.12	0.34	0.36	0.4	0.12	0.5	0.66	0.64	0.08	0.1	0.26	0.12	0.6	1.64
SWGCP_only_5000/SWlin2006.15543.cnf	0.2	0.08	0.1	0.1	0.36	0.08	0.08	0.38	0.48	0.36	0.1	0.08	0.54	0.46	0.08	0.5	0.28	0.08	0.88	1.26
SWGCP_only_5000/SWlin2006.15544.cnf	0.12	0.08	0.1	0.1	0.14	0.36	0.1	0.28	0.56	0.48	0.12	0.68	0.64	0.12	0.08	0.46	0.34	0.1	0.38	1.54
SWGCP_only_5000/SWlin2006.15545.cnf	0.24	0.2	0.1	0.1	0.42	0.28	0.12	0.16	0.46	0.38	0.14	0.68	0.6	0.62	0.1	0.4	0.26	0.1	0.72	1.46
SWGCP_only_5000/SWlin2006.15546.cnf	0.16	0.18	0.08	0.08	0.08	0.24	0.1	0.2	0.16	0.04	0.1	0.16	0.08	0.02	0.08	0.32	0.06	0.08	0.6	0.94
SWGCP_only_5000/SWlin2006.15547.cnf	0.12	0.34	0.04	0.06	0.18	0.2	0.06	0.18	0.24	0.18	0.08	0.26	0.44	0.28	0.04	0.24	0.14	0.06	0.4	0.54
SWGCP_only_5000/SWlin2006.15548.cnf	0.16	0.36	0.08	0.1	0.28	0.26	0.06	0.26	0.3	0.28	0.1	0.4	0.4	0.34	0.06	0.34	0.2	0.08	0.54	1.0
SWGCP_only_5000/SWlin2006.15549.cnf	0.24	0.7	0.08	0.1	0.38	0.36	0.12	0.14	0.48	0.14	0.12	0.5	0.74	0.44	0.08	0.48	0.26	0.1	1.06	1.52
SWGCP_only_5000/SWlin2006.15550.cnf	0.26	0.94	0.12	0.14	0.42	0.52	0.14	0.44	0.46	0.48	0.14	0.64	0.56	0.58	0.12	0.58	0.34	0.12	0.74	1.96
SWGCP_only_5000/SWlin2006.15551.cnf	0.26	0.1	0.08	0.1	0.4	0.42	0.12	0.44	0.6	0.4	0.14	0.66	1.1	0.08	0.12	0.54	0.32	0.12	0.8	1.74
SWGCP_only_5000/SWlin2006.15552.cnf	0.1	0.28	0.04	0.08	0.14	0.18	0.04	0.16	0.18	0.16	0.06	0.24	0.3	0.22	0.06	0.18	0.12	0.04	0.34	0.46
SWGCP_only_5000/SWlin2006.15553.cnf	0.12	0.3	0.06	0.08	0.18	0.18	0.06	0.18	0.26	0.2	0.08	0.28	0.38	0.26	0.06	0.24	0.12	0.06	0.4	0.56
SWGCP_only_5000/SWlin2006.15554.cnf	0.24	0.74	0.08	0.1	0.08	0.28	0.08	0.32	0.5	0.04	0.12	0.08	0.14	0.06	0.08	0.4	0.14	0.12	0.74	1.28
SWGCP_only_5000/SWlin2006.15555.cnf	0.26	0.66	0.1	0.12	0.38	0.34	0.12	0.36	0.64	0.44	0.12	0.56	1.04	0.64	0.08	0.6	0.28	0.12	0.78	1.88
SWGCP_only_5000/SWlin2006.15556.cnf	0.24	0.8	0.08	0.08	0.34	0.4	0.1	0.32	0.5	0.48	0.12	0.56	0.92	0.3	0.08	0.56	0.24	0.1	0.68	1.4
SWGCP_only_5000/SWlin2006.15557.cnf	0.24	0.7	0.12	0.1	0.44	0.36	0.14	0.4	0.48	0.46	0.14	0.6	0.82	0.44	0.12	0.62	0.3	0.14	1.26	2.04
SWGCP_only_5000/SWlin2006.15558.cnf	0.24	0.62	0.08	0.08	0.34	0.34	0.1	0.28	0.06	0.06	0.1	0.52	0.7	0.08	0.08	0.4	0.24	0.08	0.7	1.18
SWGCP_only_5000/SWlin2006.15559.cnf	0.18	0.36	0.08	0.1	0.32	0.3	0.1	0.26	0.3	0.26	0.1	0.42	0.32	0.34	0.08	0.34	0.2	0.1	0.58	1.12
SWGCP_only_5000/SWlin2006.15560.cnf	0.22	0.14	0.08	0.1	0.32	0.34	0.1	0.3	0.4	0.4	0.12	0.5	0.96	0.56	0.1	0.4	0.28	0.08	0.68	1.48
SWGCP_only_5000/SWlin2006.15561.cnf	0.12	0.16	0.06	0.06	0.2	0.18	0.08	0.18	0.2	0.24	0.08	0.34	0.22	0.22	0.06	0.26	0.14	0.08	0.44	0.7
SWGCP_only_5000/SWlin2006.15562.cnf	0.2	0.54	0.04	0.08	0.26	0.28	0.06	0.26	0.34	0.28	0.08	0.12	0.54	0.1	0.06	0.38	0.2	0.1	0.54	1.0
SWGCP_only_5000/SWlin2006.15563.cnf	0.2	0.38	0.08	0.08	0.3	0.26	0.1	0.26	0.32	0.28	0.08	0.42	0.46	0.38	0.08	0.34	0.18	0.1	0.58	1.0
SWGCP_only_5000/SWlin2006.15564.cnf	0.16	0.0	0.02	0.04	0.06	0.18	0.08	0.04	0.02	0.02	0.08	0.1	0.2	0.3	0.02	0.04	0.06	0.08	0.36	0.7
SWGCP_only_5000/SWlin2006.15565.cnf	0.24	0.28	0.1	0.1	0.36	0.42	0.14	0.36	0.36	0.4	0.14	0.62	0.34	0.34	0.12	0.46	0.22	0.12	0.82	1.86
SWGCP_only_5000/SWlin2006.15566.cnf	0.22	0.42	0.08	0.06	0.32	0.24	0.1	0.24	0.28	0.34	0.08	0.44	0.58	0.44	0.06	0.36	0.24	0.1	0.74	1.08
SWGCP_only_5000/SWlin2006.15567.cnf	0.22	0.46	0.08	0.08	0.36	0.32	0.1	0.28	0.34	0.32	0.1	0.52	0.58	0.46	0.08	0.4	0.24	0.1	0.68	1.24
SWGCP_only_5000/SWlin2006.15568.cnf	0.16	0.04	0.06	0.04	0.1	0.22	0.08	0.08	0.12	0.24	0.08	0.04	0.02	0.04	0.06	0.24	0.06	0.06	0.46	0.72
SWGCP_only_5000/SWlin2006.15569.cnf	0.04	0.06	0.06	0.08	0.02	0.04	0.08	0.02	0.02	0.24	0.08	0.16	0.06	0.02	0.08	0.32	0.06	0.06	0.06	0.76
SWGCP_only_5000/SWlin2006.15570.cnf	0.22	0.34	0.1	0.1	0.38	0.4	0.12	0.36	0.36	0.42	0.12	0.58	0.44	0.36	0.1	0.48	0.24	0.1	0.86	1.74
SWGCP_only_5000/SWlin2006.15571.cnf	0.22	0.34	0.1	0.08	0.36	0.32	0.12	0.34	0.36	0.28	0.1	0.42	0.46	0.38	0.12	0.48	0.2	0.12	0.84	1.58
SWGCP_only_5000/SWlin2006.15572.cnf	0.12	0.44	0.04	0.06	0.22	0.18	0.08	0.22	0.3	0.24	0.08	0.36	0.5	0.32	0.06	0.3	0.16	0.1	0.48	0.7
SWGCP_only_5000/SWlin2006.15573.cnf	0.26	0.76	0.1	0.08	0.4	0.14	0.12	0.36	0.08	0.14	0.12	0.12	0.92	0.46	0.1	0.52	0.26	0.12	0.42	1.66
SWGCP_only_5000/SWlin2006.15574.cnf	0.12	0.6	0.08	0.1	0.32	0.34	0.1	0.34	0.22	0.32	0.12	0.58	0.86	0.54	0.1	0.52	0.24	0.1	0.64	1.36
SWGCP_only_5000/SWlin2006.15575.cnf	0.14	0.18	0.08	0.08	0.26	0.22	0.08	0.22	0.18	0.24	0.06	0.34	0.18	0.18	0.06	0.24	0.12	0.1	0.36	0.92
SWGCP_only_5000/SWlin2006.15576.cnf	0.14	0.42	0.04	0.06	0.28	0.14	0.04	0.24	0.3	0.24	0.1	0.06	0.04	0.06	0.06	0.14	0.2	0.08	0.48	0.8
SWGCP_only_5000/SWlin2006.15577.cnf	0.22	0.28	0.06	0.08	0.38	0.3	0.12	0.3	0.56	0.38	0.1	0.56	0.86	0.36	0.1	0.44	0.3	0.1	0.9	1.34
SWGCP_only_5000/SWlin2006.15578.cnf	0.16	0.5	0.08	0.08	0.26	0.26	0.08	0.28	0.38	0.28	0.1	0.4	0.04	0.42	0.08	0.32	0.22	0.08	0.68	1.02
SWGCP_only_5000/SWlin2006.15579.cnf	0.2	0.4	0.08	0.06	0.08	0.24	0.08	0.26	0.4	0.3	0.1	0.1	0.08	0.32	0.08	0.4	0.24	0.08	0.62	1.0
SWGCP_only_5000/SWlin2006.15580.cnf	0.26	0.46	0.1	0.08	0.44	0.36	0.12	0.34	0.46	0.38	0.12	0.64	0.3	0.4	0.12	0.46	0.32	0.12	0.76	1.68
SWGCP_only_5000/SWlin2006.15581.cnf	0.2	0.64	0.08	0.08	0.2	0.3	0.1	0.3	0.48	0.36	0.1	0.54	0.1	0.38	0.08	0.44	0.24	0.08	0.76	1.1
SWGCP_only_5000/SWlin2006.15582.cnf	0.28	0.9	0.1	0.12	0.52	0.4	0.12	0.42	0.3	0.4	0.14	0.84	1.1	0.6	0.12	0.64	0.34	0.12	0.9	2.0
SWGCP_only_5000/SWlin2006.15583.cnf	0.14	0.32	0.06	0.08	0.2	0.18	0.06	0.18	0.24	0.2	0.06	0.26	0.46	0.3	0.04	0.24	0.16	0.06	0.46	0.56
SWGCP_only_5000/SWlin2006.15584.cnf	0.2	0.68	0.1	0.1	0.34	0.3	0.1	0.3	0.48	0.34	0.1	0.56	0.74	0.42	0.08	0.44	0.22	0.08	0.6	1.18
SWGCP_only_5000/SWlin2006.15585.cnf	0.28	0.7	0.1	0.12	0.46	0.36	0.12	0.32	0.44	0.32	0.12	0.66	0.74	0.14	0.1	0.6	0.34	0.12	0.82	1.94
SWGCP_only_5000/SWlin2006.15586.cnf	0.2	0.58	0.08	0.06	0.32	0.3	0.08	0.26	0.1	0.04	0.08	0.34	0.54	0.44	0.08	0.24	0.2	0.08	0.74	1.0
SWGCP_only_5000/SWlin2006.15587.cnf	0.16	0.16	0.06	0.08	0.1	0.22	0.08	0.02	0.12	0.2	0.08	0.02	0.08	0.04	0.06	0.28	0.18	0.1	0.14	0.74
SWGCP_only_5000/SWlin2006.15588.cnf	0.26	0.52	0.08	0.08	0.32	0.34	0.1	0.14	0.2	0.34	0.12	0.5	0.58	0.44	0.1	0.38	0.22	0.1	0.76	1.22
SWGCP_only_5000/SWlin2006.15589.cnf	0.14	0.26	0.04	0.06	0.2	0.18	0.08	0.18	0.24	0.2	0.06	0.3	0.44	0.22	0.08	0.24	0.18	0.08	0.38	0.6
SWGCP_only_5000/SWlin2006.15590.cnf	0.2	0.42	0.08	0.1	0.3	0.14	0.08	0.22	0.12	0.12	0.1	0.48	0.74	0.46	0.08	0.08	0.22	0.08	0.7	1.16
SWGCP_only_5000/SWlin2006.15591.cnf	0.16	0.46	0.06	0.08	0.26	0.24	0.08	0.24	0.34	0.26	0.1	0.38	0.56	0.36	0.08	0.32	0.16	0.08	0.58	0.78
SWGCP_only_5000/SWlin2006.15592.cnf	0.18	0.54	0.04	0.08	0.26	0.26	0.1	0.24	0.4	0.28	0.08	0.38	0.44	0.34	0.08	0.28	0.2	0.1	0.58	0.9
SWGCP_only_5000/SWlin2006.15593.cnf	0.16	0.5	0.08	0.1	0.1	0.2	0.06	0.04	0.02	0.04	0.1	0.04	0.64	0.16	0.06	0.32	0.04	0.1	0.52	0.86
SWGCP_only_5000/SWlin2006.15594.cnf	0.2	0.64	0.06	0.08	0.34	0.3	0.1	0.26	0.08	0.32	0.08	0.52	0.72	0.08	0.08	0.46	0.08	0.1	0.8	1.06
SWGCP_only_5000/SWlin2006.15595.cnf	0.18	0.34	0.06	0.08	0.12	0.28	0.1	0.08	0.3	0.26	0.08	0.42	0.7	0.34	0.06	0.38	0.22	0.08	0.7	0.96
SWGCP_only_5000/SWlin2006.15596.cnf	0.2	0.32	0.08	0.08	0.3	0.28	0.12	0.3	0.34	0.3	0.1	0.54	0.62	0.36	0.1	0.38	0.22	0.1	0.7	1.34
SWGCP_only_5000/SWlin2006.15597.cnf	0.12	0.3	0.04	0.06	0.18	0.14	0.04	0.14	0.2	0.14	0.06	0.24	0.34	0.24	0.04	0.16	0.1	0.08	0.32	0.42
SWGCP_only_5000/SWlin2006.15598.cnf	0.06	0.28	0.04	0.06	0.16	0.0	0.06	0.12	0.0	0.02	0.08	0.0	0.02	0.02	0.04	0.18	0.04	0.06	0.0	0.42
SWGCP_only_5000/SWlin2006.15599.cnf	0.1	0.5	0.08	0.08	0.28	0.22	0.08	0.24	0.36	0.32	0.08	0.06	0.64	0.4	0.08	0.38	0.1	0.08	0.54	0.96
SWGCP_only_5000/SWlin2006.15600.cnf	0.2	0.4	0.08	0.08	0.34	0.28	0.1	0.24	0.44	0.34	0.12	0.54	0.5	0.42	0.08	0.44	0.24	0.1	0.56	1.16
SWGCP_only_5000/SWlin2006.15601.cnf	0.12	0.34	0.06	0.04	0.2	0.16	0.06	0.16	0.26	0.2	0.06	0.28	0.4	0.28	0.06	0.22	0.14	0.06	0.42	0.5
SWGCP_only_5000/SWlin2006.15602.cnf	0.3	0.64	0.1	0.1	0.48	0.48	0.14	0.38	0.42	0.46	0.12	0.64	0.76	0.52	0.12	0.54	0.36	0.12	0.68	1.86
SWGCP_only_5000/SWlin2006.15603.cnf	0.2	0.5	0.08	0.06	0.34	0.28	0.08	0.26	0.36	0.28	0.1	0.46	0.48	0.34	0.08	0.4	0.18	0.1	0.68	1.06
SWGCP_only_5000/SWlin2006.15604.cnf	0.24	0.46	0.08	0.08	0.4	0.32	0.1	0.2	0.46	0.34	0.1	0.18	0.82	0.44	0.1	0.36	0.28	0.12	0.66	1.2
SWGCP_only_5000/SWlin2006.15605.cnf	0.12	0.26	0.04	0.06	0.18	0.18	0.06	0.16	0.18	0.16	0.06	0.26	0.32	0.24	0.06	0.24	0.14	0.06	0.32	0.58
SWGCP_only_5000/SWlin2006.15606.cnf	0.18	0.04	0.08	0.08	0.3	0.3	0.06	0.28	0.06	0.32	0.08	0.48	0.52	0.06	0.08	0.1	0.1	0.1	0.16	0.98
SWGCP_only_5000/SWlin2006.15607.cnf	0.16	0.42	0.06	0.06	0.26	0.26	0.08	0.24	0.34	0.24	0.1	0.4	0.52	0.38	0.06	0.36	0.2	0.1	0.56	0.8
SWGCP_only_5000/SWlin2006.15608.cnf	0.26	0.58	0.1	0.12	0.4	0.44	0.14	0.42	0.42	0.42	0.14	0.72	0.54	0.66	0.1	0.6	0.3	0.12	0.86	1.94
SWGCP_only_5000/SWlin2006.15609.cnf	0.26	0.34	0.1	0.12	0.38	0.38	0.12	0.36	0.4	0.32	0.12	0.52	0.38	0.34	0.12	0.56	0.2	0.14	0.7	1.98
SWGCP_only_5000/SWlin2006.15610.cnf	0.26	0.62	0.08	0.12	0.38	0.34	0.14	0.34	0.36	0.36	0.14	0.62	0.46	0.52	0.1	0.52	0.24	0.12	0.68	1.86
SWGCP_only_5000/SWlin2006.15611.cnf	0.14	0.0	0.06	0.08	0.08	0.0	0.08	0.2	0.28	0.2	0.08	0.04	0.18	0.24	0.08	0.1	0.06	0.06	0.02	0.62
SWGCP_only_5000/SWlin2006.15612.cnf	0.18	0.32	0.08	0.08	0.16	0.12	0.1	0.2	0.2	0.34	0.1	0.06	0.16	0.06	0.08	0.46	0.22	0.1	0.78	1.26
SWGCP_only_5000/SWlin2006.15613.cnf	0.24	0.46	0.08	0.1	0.38	0.34	0.08	0.34	0.54	0.4	0.1	0.56	0.24	0.6	0.08	0.42	0.06	0.1	0.78	1.3
SWGCP_only_5000/SWlin2006.15614.cnf	0.24	0.32	0.08	0.12	0.36	0.36	0.12	0.34	0.18	0.4	0.12	0.64	0.94	0.56	0.08	0.32	0.3	0.08	0.78	1.4
SWGCP_only_5000/SWlin2006.15615.cnf	0.22	0.46	0.08	0.08	0.28	0.28	0.08	0.34	0.4	0.38	0.1	0.56	0.72	0.36	0.08	0.34	0.24	0.08	0.62	1.26
SWGCP_only_5000/SWlin2006.15616.cnf	0.16	0.52	0.08	0.08	0.22	0.28	0.1	0.24	0.38	0.06	0.12	0.44	0.2	0.02	0.1	0.32	0.12	0.08	0.52	0.92
SWGCP_only_5000/SWlin2006.15617.cnf	0.26	0.14	0.1	0.1	0.36	0.32	0.14	0.42	0.4	0.48	0.12	0.6	0.66	0.48	0.12	0.5	0.26	0.1	0.76	1.66
SWGCP_only_5000/SWlin2006.15618.cnf	0.22	0.4	0.1	0.1	0.3	0.34	0.12	0.3	0.32	0.34	0.1	0.46	0.54	0.4	0.08	0.44	0.22	0.1	0.72	1.44
SWGCP_only_5000/SWlin2006.15619.cnf	0.18	0.48	0.06	0.06	0.3	0.3	0.08	0.26	0.4	0.28	0.1	0.4	0.48	0.42	0.08	0.36	0.2	0.1	0.56	0.98
SWGCP_only_5000/SWlin2006.15620.cnf	0.18	0.46	0.06	0.08	0.28	0.24	0.08	0.24	0.3	0.26	0.08	0.36	0.58	0.36	0.06	0.3	0.2	0.08	0.58	0.8
SWGCP_only_5000/SWlin2006.15621.cnf	0.22	0.46	0.1	0.08	0.32	0.08	0.12	0.22	0.08	0.24	0.14	0.62	0.92	0.14	0.1	0.54	0.28	0.12	0.84	1.48
SWGCP_only_5000/SWlin2006.15622.cnf	0.14	0.26	0.06	0.06	0.16	0.18	0.04	0.12	0.22	0.2	0.06	0.26	0.34	0.22	0.06	0.18	0.14	0.08	0.42	0.54
SWGCP_only_5000/SWlin2006.15623.cnf	0.12	0.26	0.06	0.06	0.18	0.16	0.06	0.14	0.18	0.16	0.08	0.22	0.3	0.18	0.04	0.22	0.12	0.06	0.3	0.5
SWGCP_only_5000/SWlin2006.15624.cnf	0.1	0.22	0.04	0.04	0.16	0.14	0.08	0.12	0.16	0.16	0.06	0.18	0.26	0.2	0.04	0.2	0.12	0.08	0.32	0.48
SWGCP_only_5000/SWlin2006.15625.cnf	0.14	0.4	0.06	0.06	0.22	0.22	0.06	0.2	0.28	0.22	0.06	0.3	0.5	0.32	0.06	0.26	0.18	0.04	0.44	0.58
SWGCP_only_5000/SWlin2006.15626.cnf	0.26	0.4	0.12	0.14	0.34	0.46	0.12	0.42	0.5	0.46	0.12	0.6	0.76	0.54	0.1	0.56	0.32	0.1	1.12	1.9
SWGCP_only_5000/SWlin2006.15627.cnf	0.22	0.68	0.08	0.1	0.36	0.44	0.08	0.3	0.4	0.38	0.1	0.46	0.7	0.42	0.12	0.44	0.24	0.1	0.76	1.52
SWGCP_only_5000/SWlin2006.15628.cnf	0.22	0.88	0.1	0.1	0.42	0.42	0.12	0.4	0.16	0.4	0.14	0.58	0.52	0.74	0.12	0.52	0.38	0.12	0.78	1.86
SWGCP_only_5000/SWlin2006.15629.cnf	0.1	0.2	0.04	0.06	0.14	0.14	0.06	0.14	0.18	0.14	0.06	0.2	0.24	0.16	0.06	0.16	0.1	0.06	0.3	0.42
SWGCP_only_5000/SWlin2006.15630.cnf	0.08	0.5	0.06	0.06	0.24	0.22	0.06	0.24	0.24	0.12	0.1	0.04	0.58	0.16	0.08	0.24	0.2	0.06	0.56	0.8
SWGCP_only_5000/SWlin2006.15631.cnf	0.16	0.22	0.06	0.08	0.2	0.2	0.06	0.2	0.2	0.22	0.08	0.32	0.32	0.24	0.06	0.24	0.14	0.08	0.46	0.68
SWGCP_only_5000/SWlin2006.15632.cnf	0.26	0.46	0.1	0.1	0.4	0.46	0.12	0.4	0.08	0.48	0.14	0.54	0.18	0.26	0.08	0.54	0.32	0.12	1.0	1.72
SWGCP_only_5000/SWlin2006.15633.cnf	0.26	0.64	0.12	0.08	0.42	0.44	0.12	0.34	0.4	0.34	0.14	0.54	0.58	0.58	0.1	0.48	0.28	0.1	0.82	1.82
SWGCP_only_5000/SWlin2006.15634.cnf	0.12	0.16	0.06	0.08	0.22	0.2	0.06	0.18	0.18	0.22	0.08	0.32	0.2	0.18	0.08	0.28	0.1	0.08	0.46	0.68
SWGCP_only_5000/SWlin2006.15635.cnf	0.04	0.02	0.06	0.06	0.02	0.02	0.06	0.02	0.0	0.22	0.06	0.04	0.02	0.02	0.02	0.24	0.02	0.08	0.46	0.62
SWGCP_only_5000/SWlin2006.15636.cnf	0.24	0.36	0.08	0.1	0.4	0.34	0.1	0.26	0.38	0.4	0.12	0.5	0.66	0.5	0.08	0.4	0.26	0.1	0.58	1.32
SWGCP_only_5000/SWlin2006.15637.cnf	0.28	0.66	0.08	0.12	0.46	0.36	0.12	0.4	0.68	0.4	0.14	0.18	0.34	0.74	0.12	0.52	0.3	0.12	0.94	1.94
SWGCP_only_5000/SWlin2006.15638.cnf	0.24	0.16	0.08	0.12	0.12	0.36	0.12	0.18	0.1	0.36	0.14	0.34	0.92	0.54	0.08	0.56	0.32	0.1	0.18	1.84
SWGCP_only_5000/SWlin2006.15639.cnf	0.14	0.34	0.04	0.06	0.18	0.18	0.06	0.16	0.24	0.2	0.06	0.28	0.42	0.22	0.06	0.24	0.16	0.06	0.4	0.54
SWGCP_only_5000/SWlin2006.15640.cnf	0.24	0.54	0.08	0.1	0.38	0.34	0.1	0.22	0.42	0.36	0.12	0.54	0.14	0.56	0.1	0.5	0.3	0.1	0.62	1.4
SWGCP_only_5000/SWlin2006.15641.cnf	0.18	0.46	0.08	0.08	0.12	0.26	0.08	0.28	0.36	0.28	0.1	0.42	0.68	0.46	0.06	0.34	0.22	0.1	0.64	1.0
SWGCP_only_5000/SWlin2006.15642.cnf	0.14	0.24	0.06	0.06	0.22	0.22	0.06	0.18	0.24	0.22	0.1	0.32	0.38	0.26	0.08	0.28	0.16	0.08	0.46	0.7
SWGCP_only_5000/SWlin2006.15643.cnf	0.28	0.88	0.1	0.1	0.32	0.42	0.12	0.34	0.46	0.4	0.12	0.62	0.2	0.62	0.1	0.54	0.28	0.12	0.48	1.8
SWGCP_only_5000/SWlin2006.15644.cnf	0.14	0.26	0.06	0.08	0.18	0.2	0.08	0.14	0.2	0.16	0.06	0.24	0.32	0.22	0.04	0.24	0.12	0.06	0.28	0.5
SWGCP_only_5000/SWlin2006.15645.cnf	0.12	0.24	0.06	0.06	0.04	0.16	0.06	0.04	0.24	0.2	0.08	0.28	0.42	0.3	0.08	0.12	0.14	0.08	0.42	0.54
SWGCP_only_5000/SWlin2006.15646.cnf	0.14	0.0	0.04	0.08	0.04	0.2	0.06	0.02	0.02	0.22	0.08	0.32	0.04	0.0	0.06	0.26	0.02	0.06	0.46	0.6
SWGCP_only_5000/SWlin2006.15647.cnf	0.28	0.48	0.08	0.1	0.38	0.36	0.12	0.32	0.42	0.4	0.12	0.56	0.52	0.42	0.1	0.5	0.32	0.1	0.82	1.48
SWGCP_only_5000/SWlin2006.15648.cnf	0.22	0.6	0.1	0.12	0.48	0.32	0.12	0.38	0.48	0.38	0.12	0.58	0.56	0.58	0.1	0.48	0.16	0.1	0.84	1.82
SWGCP_only_5000/SWlin2006.15649.cnf	0.24	0.72	0.1	0.12	0.42	0.38	0.14	0.38	0.46	0.48	0.14	0.72	0.66	0.5	0.1	0.64	0.3	0.12	0.92	1.82
SWGCP_only_5000/SWlin2006.15650.cnf	0.28	0.86	0.1	0.12	0.4	0.4	0.12	0.36	0.1	0.44	0.16	0.54	0.76	0.74	0.12	0.64	0.24	0.12	1.12	1.9
SWGCP_only_5000/SWlin2006.15651.cnf	0.26	0.12	0.1	0.1	0.38	0.38	0.1	0.32	0.44	0.3	0.12	0.46	0.14	0.54	0.12	0.42	0.28	0.08	0.94	1.52
SWGCP_only_5000/SWlin2006.15652.cnf	0.1	0.26	0.06	0.06	0.16	0.16	0.08	0.16	0.2	0.16	0.06	0.2	0.3	0.24	0.04	0.22	0.12	0.08	0.36	0.48
SWGCP_only_5000/SWlin2006.15653.cnf	0.24	0.52	0.1	0.1	0.42	0.46	0.14	0.32	0.66	0.46	0.12	0.66	0.84	0.6	0.14	0.22	0.34	0.14	0.78	1.86
SWGCP_only_5000/SWlin2006.15654.cnf	0.06	0.22	0.08	0.04	0.04	0.04	0.08	0.04	0.04	0.08	0.08	0.38	0.04	0.1	0.06	0.32	0.16	0.08	0.56	0.74
SWGCP_only_5000/SWlin2006.15655.cnf	0.24	0.7	0.12	0.1	0.42	0.38	0.1	0.36	0.5	0.42	0.12	0.56	0.7	0.1	0.1	0.54	0.18	0.1	0.74	1.68
SWGCP_only_5000/SWlin2006.15656.cnf	0.12	0.0	0.04	0.04	0.24	0.06	0.02	0.1	0.02	0.2	0.08	0.3	0.02	0.0	0.08	0.04	0.16	0.08	0.48	0.64
SWGCP_only_5000/SWlin2006.15657.cnf	0.26	0.56	0.1	0.12	0.42	0.42	0.14	0.44	0.38	0.42	0.12	0.62	0.58	0.56	0.1	0.54	0.28	0.12	0.78	1.78
SWGCP_only_5000/SWlin2006.15658.cnf	0.18	0.02	0.08	0.08	0.18	0.06	0.08	0.26	0.36	0.06	0.08	0.04	0.12	0.38	0.02	0.1	0.18	0.1	0.64	0.86
SWGCP_only_5000/SWlin2006.15659.cnf	0.02	0.02	0.06	0.08	0.02	0.0	0.08	0.08	0.02	0.0	0.04	0.2	0.02	0.02	0.04	0.02	0.02	0.08	0.42	0.62
SWGCP_only_5000/SWlin2006.15660.cnf	0.12	0.22	0.04	0.04	0.18	0.16	0.06	0.12	0.18	0.14	0.06	0.22	0.28	0.18	0.06	0.2	0.14	0.06	0.34	0.5
SWGCP_only_5000/SWlin2006.15661.cnf	0.24	0.5	0.1	0.1	0.38	0.3	0.1	0.3	0.42	0.3	0.1	0.5	0.68	0.5	0.08	0.4	0.28	0.1	0.7	1.44
SWGCP_only_5000/SWlin2006.15662.cnf	0.1	0.28	0.06	0.06	0.18	0.16	0.06	0.18	0.24	0.2	0.08	0.3	0.4	0.28	0.06	0.22	0.14	0.08	0.44	0.56
SWGCP_only_5000/SWlin2006.15663.cnf	0.08	0.36	0.06	0.06	0.06	0.16	0.06	0.18	0.04	0.02	0.06	0.22	0.16	0.18	0.08	0.26	0.16	0.06	0.3	0.64
SWGCP_only_5000/SWlin2006.15664.cnf	0.2	0.1	0.08	0.1	0.36	0.36	0.1	0.36	0.5	0.32	0.12	0.14	0.5	0.12	0.08	0.44	0.14	0.12	0.98	1.36
SWGCP_only_5000/SWlin2006.15665.cnf	0.3	0.72	0.1	0.12	0.4	0.42	0.14	0.34	0.52	0.46	0.14	0.62	0.54	0.44	0.12	0.5	0.28	0.12	0.74	1.8
SWGCP_only_5000/SWlin2006.15666.cnf	0.1	0.44	0.08	0.1	0.4	0.34	0.12	0.3	0.48	0.44	0.1	0.5	0.76	0.46	0.06	0.46	0.22	0.12	0.7	1.32
SWGCP_only_5000/SWlin2006.15667.cnf	0.18	0.54	0.08	0.08	0.34	0.3	0.08	0.28	0.32	0.32	0.08	0.48	0.66	0.46	0.06	0.42	0.22	0.1	0.72	1.08
SWGCP_only_5000/SWlin2006.15668.cnf	0.22	0.38	0.1	0.1	0.36	0.36	0.12	0.4	0.44	0.5	0.12	0.6	0.66	0.46	0.1	0.56	0.32	0.1	0.86	1.62
SWGCP_only_5000/SWlin2006.15669.cnf	0.14	0.52	0.06	0.06	0.26	0.24	0.08	0.22	0.34	0.3	0.08	0.42	0.54	0.4	0.06	0.36	0.18	0.08	0.62	0.8
SWGCP_only_5000/SWlin2006.15670.cnf	0.2	0.62	0.06	0.08	0.32	0.3	0.12	0.32	0.08	0.36	0.12	0.2	0.64	0.18	0.08	0.4	0.26	0.1	0.32	1.22
SWGCP_only_5000/SWlin2006.15671.cnf	0.18	0.24	0.06	0.08	0.26	0.34	0.08	0.28	0.34	0.32	0.12	0.42	0.3	0.26	0.1	0.48	0.2	0.1	0.7	1.26
SWGCP_only_5000/SWlin2006.15672.cnf	0.22	0.52	0.08	0.08	0.36	0.3	0.1	0.32	0.48	0.34	0.12	0.52	0.54	0.4	0.1	0.48	0.24	0.1	0.6	1.34
SWGCP_only_5000/SWlin2006.15673.cnf	0.08	0.08	0.08	0.1	0.32	0.32	0.1	0.34	0.36	0.32	0.1	0.44	0.08	0.44	0.08	0.46	0.14	0.1	0.88	1.3
SWGCP_only_5000/SWlin2006.15674.cnf	0.12	0.26	0.08	0.06	0.16	0.16	0.04	0.14	0.2	0.16	0.08	0.24	0.32	0.22	0.04	0.0	0.12	0.06	0.12	0.42
SWGCP_only_5000/SWlin2006.15675.cnf	0.24	0.4	0.08	0.1	0.34	0.34	0.08	0.28	0.34	0.32	0.1	0.44	0.44	0.38	0.08	0.44	0.24	0.1	0.66	1.2
SWGCP_only_5000/SWlin2006.15676.cnf	0.16	0.6	0.08	0.08	0.26	0.3	0.1	0.28	0.36	0.12	0.12	0.46	0.14	0.48	0.06	0.42	0.2	0.1	0.54	1.08
SWGCP_only_5000/SWlin2006.15677.cnf	0.24	0.14	0.08	0.1	0.4	0.36	0.1	0.34	0.2	0.36	0.1	0.26	0.78	0.46	0.1	0.42	0.26	0.08	0.74	1.3
SWGCP_only_5000/SWlin2006.15678.cnf	0.24	0.14	0.08	0.1	0.36	0.38	0.12	0.16	0.08	0.28	0.12	0.5	0.22	0.46	0.1	0.4	0.26	0.08	0.08	1.3
SWGCP_only_5000/SWlin2006.15679.cnf	0.2	0.64	0.06	0.1	0.1	0.16	0.08	0.26	0.02	0.34	0.12	0.26	0.7	0.04	0.08	0.4	0.12	0.08	0.62	1.06
SWGCP_only_5000/SWlin2006.15680.cnf	0.22	0.38	0.08	0.08	0.3	0.28	0.08	0.28	0.36	0.32	0.08	0.04	0.6	0.26	0.08	0.42	0.1	0.08	0.72	1.04
SWGCP_only_5000/SWlin2006.15681.cnf	0.22	0.38	0.1	0.1	0.48	0.36	0.1	0.38	0.52	0.36	0.12	0.48	0.64	0.4	0.1	0.52	0.26	0.08	0.54	1.54
SWGCP_only_5000/SWlin2006.15682.cnf	0.24	0.62	0.08	0.08	0.34	0.32	0.1	0.24	0.48	0.32	0.12	0.48	0.56	0.44	0.08	0.44	0.26	0.08	0.74	1.22
SWGCP_only_5000/SWlin2006.15683.cnf	0.16	0.12	0.08	0.06	0.02	0.08	0.08	0.02	0.02	0.24	0.08	0.04	0.1	0.3	0.08	0.04	0.06	0.08	0.52	0.7
SWGCP_only_5000/SWlin2006.15684.cnf	0.02	0.0	0.06	0.06	0.0	0.06	0.02	0.02	0.02	0.0	0.06	0.0	0.02	0.2	0.06	0.0	0.02	0.06	0.02	0.56
SWGCP_only_5000/SWlin2006.15685.cnf	0.12	0.34	0.06	0.04	0.18	0.18	0.08	0.16	0.22	0.18	0.06	0.28	0.36	0.26	0.06	0.24	0.12	0.06	0.42	0.58
SWGCP_only_5000/SWlin2006.15686.cnf	0.08	0.22	0.08	0.12	0.32	0.36	0.12	0.32	0.4	0.14	0.1	0.5	0.52	0.48	0.08	0.42	0.08	0.1	0.64	1.36
SWGCP_only_5000/SWlin2006.15687.cnf	0.14	0.44	0.06	0.06	0.26	0.22	0.08	0.22	0.32	0.24	0.06	0.38	0.56	0.34	0.08	0.34	0.18	0.08	0.56	0.74
SWGCP_only_5000/SWlin2006.15688.cnf	0.18	0.22	0.06	0.08	0.3	0.28	0.1	0.26	0.38	0.08	0.1	0.4	0.64	0.36	0.06	0.2	0.06	0.08	0.28	1.0
SWGCP_only_5000/SWlin2006.15689.cnf	0.2	0.36	0.08	0.04	0.28	0.26	0.08	0.22	0.24	0.3	0.1	0.38	0.52	0.36	0.08	0.32	0.18	0.08	0.58	0.88
SWGCP_only_5000/SWlin2006.15690.cnf	0.22	0.56	0.08	0.08	0.38	0.34	0.08	0.34	0.46	0.42	0.1	0.54	0.54	0.38	0.1	0.42	0.24	0.1	0.62	1.44
SWGCP_only_5000/SWlin2006.15691.cnf	0.1	0.24	0.06	0.06	0.16	0.14	0.06	0.16	0.16	0.16	0.06	0.22	0.26	0.2	0.06	0.18	0.12	0.1	0.3	0.46
SWGCP_only_5000/SWlin2006.15692.cnf	0.24	0.6	0.08	0.12	0.46	0.42	0.12	0.36	0.48	0.44	0.1	0.52	0.68	0.56	0.1	0.58	0.26	0.12	0.84	1.78
SWGCP_only_5000/SWlin2006.15693.cnf	0.24	0.62	0.1	0.12	0.36	0.36	0.1	0.22	0.04	0.44	0.12	0.18	0.66	0.48	0.12	0.46	0.28	0.14	0.24	1.64
SWGCP_only_5000/SWlin2006.15694.cnf	0.26	0.18	0.1	0.1	0.44	0.26	0.14	0.36	0.1	0.52	0.14	0.84	0.14	0.7	0.1	0.58	0.32	0.12	1.02	1.82
SWGCP_only_5000/SWlin2006.15695.cnf	0.12	0.34	0.06	0.06	0.18	0.14	0.04	0.16	0.22	0.18	0.06	0.26	0.38	0.26	0.06	0.2	0.16	0.08	0.38	0.52
SWGCP_only_5000/SWlin2006.15696.cnf	0.24	0.7	0.12	0.12	0.44	0.42	0.14	0.42	0.64	0.48	0.14	0.86	0.68	0.64	0.12	0.5	0.26	0.12	1.1	2.0
SWGCP_only_5000/SWlin2006.15697.cnf	0.14	0.34	0.04	0.06	0.18	0.16	0.06	0.12	0.2	0.18	0.08	0.22	0.38	0.24	0.06	0.24	0.12	0.06	0.38	0.52
SWGCP_only_5000/SWlin2006.15698.cnf	0.12	0.28	0.04	0.04	0.18	0.18	0.08	0.16	0.18	0.18	0.06	0.28	0.38	0.26	0.06	0.22	0.14	0.08	0.4	0.54
SWGCP_only_5000/SWlin2006.15699.cnf	0.24	0.74	0.08	0.12	0.4	0.38	0.12	0.32	0.48	0.14	0.14	0.52	0.62	0.2	0.08	0.54	0.08	0.1	0.92	1.38
SWGCP_only_5000/SWlin2006.15700.cnf	0.12	0.4	0.04	0.06	0.22	0.18	0.06	0.18	0.22	0.22	0.08	0.32	0.46	0.28	0.06	0.26	0.12	0.08	0.44	0.6
SWGCP_only_5000/SWlin2006.15701.cnf	0.2	0.44	0.1	0.08	0.32	0.3	0.1	0.28	0.2	0.1	0.1	0.46	0.72	0.38	0.08	0.38	0.26	0.12	0.66	1.16
SWGCP_only_5000/SWlin2006.15702.cnf	0.18	0.24	0.06	0.08	0.22	0.22	0.1	0.2	0.26	0.14	0.08	0.16	0.08	0.2	0.06	0.28	0.18	0.08	0.56	0.82
SWGCP_only_5000/SWlin2006.15703.cnf	0.12	0.38	0.06	0.06	0.2	0.2	0.08	0.16	0.22	0.18	0.1	0.34	0.24	0.22	0.06	0.28	0.16	0.06	0.38	0.6
SWGCP_only_5000/SWlin2006.15704.cnf	0.2	0.46	0.1	0.08	0.34	0.3	0.08	0.24	0.08	0.28	0.1	0.32	0.18	0.42	0.08	0.38	0.1	0.08	0.78	1.08
SWGCP_only_5000/SWlin2006.15705.cnf	0.08	0.02	0.06	0.06	0.26	0.18	0.06	0.22	0.02	0.26	0.08	0.36	0.46	0.38	0.08	0.32	0.16	0.1	0.58	0.84
SWGCP_only_5000/SWlin2006.15706.cnf	0.2	0.58	0.08	0.08	0.34	0.26	0.1	0.26	0.34	0.32	0.08	0.5	0.62	0.48	0.06	0.4	0.24	0.08	0.7	1.08
SWGCP_only_5000/SWlin2006.15707.cnf	0.24	0.12	0.06	0.06	0.4	0.28	0.12	0.34	0.12	0.2	0.12	0.58	0.56	0.42	0.08	0.48	0.18	0.1	0.56	1.26
SWGCP_only_5000/SWlin2006.15708.cnf	0.12	0.26	0.06	0.1	0.38	0.38	0.12	0.28	0.36	0.1	0.12	0.56	0.66	0.52	0.1	0.46	0.28	0.1	0.72	1.3
SWGCP_only_5000/SWlin2006.15709.cnf	0.16	0.1	0.08	0.1	0.38	0.34	0.1	0.34	0.36	0.38	0.1	0.5	0.82	0.5	0.1	0.44	0.2	0.1	0.64	1.3
SWGCP_only_5000/SWlin2006.15710.cnf	0.22	0.82	0.08	0.08	0.36	0.34	0.1	0.34	0.46	0.34	0.12	0.6	0.96	0.52	0.1	0.48	0.26	0.1	0.84	1.46
SWGCP_only_5000/SWlin2006.15711.cnf	0.24	0.7	0.12	0.1	0.46	0.48	0.14	0.42	0.4	0.42	0.16	0.54	0.82	0.54	0.1	0.6	0.26	0.14	0.92	1.82
SWGCP_only_5000/SWlin2006.15712.cnf	0.2	0.38	0.1	0.1	0.38	0.32	0.12	0.3	0.48	0.46	0.14	0.56	0.78	0.56	0.1	0.48	0.3	0.12	0.98	1.44
SWGCP_only_5000/SWlin2006.15713.cnf	0.16	0.28	0.04	0.06	0.18	0.2	0.06	0.18	0.22	0.24	0.1	0.28	0.36	0.26	0.08	0.26	0.18	0.1	0.48	0.74
SWGCP_only_5000/SWlin2006.15714.cnf	0.18	0.5	0.08	0.08	0.06	0.28	0.08	0.26	0.06	0.06	0.1	0.1	0.68	0.32	0.06	0.34	0.24	0.1	0.68	0.96
SWGCP_only_5000/SWlin2006.15715.cnf	0.18	0.44	0.08	0.08	0.28	0.28	0.1	0.22	0.3	0.3	0.06	0.46	0.56	0.36	0.06	0.34	0.18	0.08	0.56	0.96
SWGCP_only_5000/SWlin2006.15716.cnf	0.14	0.36	0.06	0.04	0.22	0.2	0.06	0.16	0.26	0.22	0.04	0.3	0.44	0.28	0.06	0.24	0.16	0.1	0.44	0.6
SWGCP_only_5000/SWlin2006.15717.cnf	0.24	0.48	0.1	0.12	0.54	0.5	0.14	0.34	0.56	0.44	0.12	0.64	0.24	0.16	0.12	0.54	0.3	0.1	0.98	1.96
SWGCP_only_5000/SWlin2006.15718.cnf	0.22	0.62	0.1	0.1	0.46	0.44	0.12	0.36	0.7	0.4	0.14	0.7	0.86	0.58	0.1	0.6	0.28	0.12	0.86	1.92
SWGCP_only_5000/SWlin2006.15719.cnf	0.26	0.64	0.1	0.14	0.4	0.36	0.12	0.34	0.28	0.34	0.12	0.62	0.72	0.56	0.12	0.56	0.24	0.12	1.02	1.74
SWGCP_only_5000/SWlin2006.15720.cnf	0.16	0.36	0.06	0.06	0.1	0.24	0.06	0.22	0.34	0.22	0.08	0.38	0.56	0.1	0.06	0.12	0.18	0.08	0.48	0.72
SWGCP_only_5000/SWlin2006.15721.cnf	0.18	0.06	0.08	0.08	0.3	0.24	0.08	0.28	0.4	0.3	0.1	0.1	0.04	0.02	0.08	0.36	0.04	0.1	0.58	0.98
SWGCP_only_5000/SWlin2006.15722.cnf	0.2	0.32	0.1	0.1	0.38	0.36	0.12	0.34	0.36	0.3	0.12	0.46	0.48	0.44	0.1	0.44	0.28	0.14	0.66	1.54
SWGCP_only_5000/SWlin2006.15723.cnf	0.24	0.56	0.1	0.12	0.4	0.36	0.12	0.34	0.48	0.4	0.12	0.58	0.62	0.42	0.14	0.48	0.26	0.12	1.02	1.94
SWGCP_only_5000/SWlin2006.15724.cnf	0.2	0.6	0.08	0.08	0.32	0.34	0.1	0.28	0.28	0.14	0.12	0.42	0.72	0.52	0.08	0.4	0.24	0.1	0.8	1.12
SWGCP_only_5000/SWlin2006.15725.cnf	0.18	0.36	0.08	0.08	0.22	0.28	0.1	0.22	0.4	0.26	0.08	0.34	0.62	0.42	0.08	0.3	0.18	0.08	0.64	0.9
SWGCP_only_5000/SWlin2006.15726.cnf	0.16	0.38	0.04	0.06	0.22	0.22	0.08	0.2	0.26	0.22	0.08	0.32	0.42	0.34	0.08	0.3	0.16	0.06	0.44	0.68
SWGCP_only_5000/SWlin2006.15727.cnf	0.12	0.3	0.04	0.04	0.16	0.16	0.06	0.14	0.22	0.14	0.08	0.24	0.34	0.24	0.06	0.22	0.12	0.06	0.34	0.48
SWGCP_only_5000/SWlin2006.15728.cnf	0.18	0.66	0.1	0.08	0.34	0.32	0.1	0.32	0.36	0.36	0.12	0.44	0.58	0.34	0.1	0.36	0.24	0.08	0.7	1.2
SWGCP_only_5000/SWlin2006.15729.cnf	0.22	0.3	0.12	0.1	0.34	0.36	0.12	0.36	0.26	0.34	0.14	0.36	0.32	0.26	0.1	0.46	0.2	0.1	0.62	1.76
SWGCP_only_5000/SWlin2006.15730.cnf	0.22	0.08	0.08	0.08	0.26	0.34	0.1	0.28	0.46	0.3	0.08	0.4	0.76	0.48	0.08	0.42	0.26	0.08	0.16	1.16
SWGCP_only_5000/SWlin2006.15731.cnf	0.14	0.2	0.06	0.06	0.22	0.24	0.08	0.22	0.2	0.22	0.1	0.38	0.26	0.22	0.08	0.26	0.14	0.08	0.46	0.8
SWGCP_only_5000/SWlin2006.15732.cnf	0.26	0.6	0.1	0.12	0.48	0.38	0.14	0.38	0.36	0.46	0.14	0.72	0.64	0.68	0.12	0.52	0.34	0.14	0.96	1.94
SWGCP_only_5000/SWlin2006.15733.cnf	0.16	0.0	0.06	0.04	0.2	0.02	0.06	0.1	0.0	0.2	0.06	0.3	0.4	0.26	0.06	0.24	0.14	0.06	0.12	0.56
SWGCP_only_5000/SWlin2006.15734.cnf	0.22	0.6	0.08	0.08	0.4	0.32	0.1	0.32	0.5	0.4	0.1	0.52	0.84	0.54	0.1	0.46	0.28	0.08	0.88	1.3
SWGCP_only_5000/SWlin2006.15735.cnf	0.16	0.32	0.06	0.08	0.24	0.24	0.08	0.22	0.3	0.26	0.1	0.32	0.52	0.32	0.06	0.34	0.2	0.08	0.54	0.82
SWGCP_only_5000/SWlin2006.15736.cnf	0.22	0.68	0.08	0.1	0.42	0.32	0.12	0.34	0.46	0.36	0.14	0.56	0.68	0.18	0.12	0.4	0.28	0.08	0.76	1.48
SWGCP_only_5000/SWlin2006.15737.cnf	0.22	0.62	0.08	0.08	0.36	0.34	0.1	0.32	0.48	0.36	0.12	0.6	0.84	0.44	0.08	0.44	0.26	0.1	0.72	1.3
SWGCP_only_5000/SWlin2006.15738.cnf	0.14	0.12	0.06	0.06	0.08	0.26	0.08	0.06	0.06	0.28	0.08	0.32	0.42	0.04	0.04	0.22	0.2	0.08	0.52	0.8
SWGCP_only_5000/SWlin2006.15739.cnf	0.2	0.7	0.08	0.1	0.4	0.3	0.12	0.3	0.48	0.38	0.14	0.58	0.62	0.48	0.1	0.48	0.24	0.1	0.88	1.22
SWGCP_only_5000/SWlin2006.15740.cnf	0.26	0.64	0.1	0.12	0.5	0.42	0.12	0.44	0.5	0.52	0.14	0.8	0.34	0.4	0.1	0.58	0.26	0.1	0.84	1.76
SWGCP_only_5000/SWlin2006.15741.cnf	0.1	0.26	0.06	0.06	0.16	0.14	0.04	0.16	0.2	0.16	0.08	0.24	0.36	0.22	0.08	0.22	0.12	0.06	0.34	0.46
SWGCP_only_5000/SWlin2006.15742.cnf	0.26	0.56	0.1	0.12	0.42	0.38	0.12	0.36	0.42	0.42	0.14	0.64	0.64	0.18	0.1	0.54	0.3	0.1	0.8	1.72
SWGCP_only_5000/SWlin2006.15743.cnf	0.26	0.6	0.08	0.1	0.46	0.36	0.14	0.38	0.62	0.44	0.14	0.66	0.76	0.16	0.1	0.38	0.34	0.1	0.72	1.92
SWGCP_only_5000/SWlin2006.15744.cnf	0.2	0.48	0.1	0.08	0.34	0.32	0.1	0.26	0.32	0.34	0.1	0.48	0.44	0.52	0.08	0.34	0.12	0.12	0.7	1.2
SWGCP_only_5000/SWlin2006.15745.cnf	0.16	0.52	0.06	0.06	0.28	0.24	0.08	0.26	0.42	0.28	0.1	0.5	0.6	0.42	0.08	0.36	0.22	0.08	0.48	0.96
SWGCP_only_5000/SWlin2006.15746.cnf	0.22	0.54	0.08	0.12	0.4	0.36	0.12	0.34	0.4	0.38	0.12	0.6	0.7	0.48	0.1	0.44	0.3	0.12	1.18	1.66
SWGCP_only_5000/SWlin2006.15747.cnf	0.22	0.54	0.1	0.1	0.36	0.38	0.1	0.34	0.38	0.36	0.1	0.58	0.44	0.48	0.1	0.4	0.3	0.12	0.76	1.52
SWGCP_only_5000/SWlin2006.15748.cnf	0.16	0.44	0.08	0.08	0.24	0.24	0.08	0.22	0.3	0.28	0.12	0.42	0.52	0.3	0.06	0.32	0.18	0.08	0.64	0.88
SWGCP_only_5000/SWlin2006.15749.cnf	0.2	0.64	0.06	0.08	0.34	0.34	0.08	0.3	0.44	0.34	0.1	0.22	0.76	0.16	0.06	0.18	0.24	0.1	0.22	1.16
SWGCP_only_5000/SWlin2006.15750.cnf	0.16	0.42	0.06	0.08	0.26	0.2	0.02	0.06	0.3	0.26	0.08	0.36	0.58	0.06	0.08	0.3	0.22	0.08	0.16	0.74
SWGCP_only_5000/SWlin2006.15751.cnf	0.1	0.16	0.06	0.06	0.2	0.18	0.06	0.18	0.2	0.22	0.06	0.28	0.24	0.2	0.06	0.24	0.14	0.1	0.38	0.66
SWGCP_only_5000/SWlin2006.15752.cnf	0.18	0.08	0.04	0.08	0.32	0.02	0.1	0.26	0.24	0.3	0.1	0.52	0.3	0.12	0.08	0.2	0.22	0.1	0.62	1.04
SWGCP_only_5000/SWlin2006.15753.cnf	0.1	0.02	0.06	0.1	0.02	0.12	0.06	0.22	0.06	0.04	0.06	0.04	0.04	0.02	0.08	0.32	0.02	0.08	0.04	0.78
SWGCP_only_5000/SWlin2006.15754.cnf	0.22	0.64	0.08	0.1	0.42	0.42	0.1	0.32	0.36	0.44	0.12	0.7	0.48	0.14	0.1	0.36	0.32	0.12	1.04	1.72
SWGCP_only_5000/SWlin2006.15755.cnf	0.28	0.56	0.08	0.1	0.32	0.3	0.1	0.36	0.3	0.34	0.12	0.52	0.68	0.36	0.08	0.42	0.28	0.08	0.76	1.38
SWGCP_only_5000/SWlin2006.15756.cnf	0.24	0.56	0.1	0.1	0.38	0.44	0.1	0.34	0.6	0.32	0.12	0.62	0.66	0.38	0.12	0.5	0.3	0.1	0.64	1.58
SWGCP_only_5000/SWlin2006.15757.cnf	0.2	0.1	0.08	0.08	0.08	0.34	0.08	0.08	0.12	0.34	0.1	0.52	0.04	0.5	0.06	0.38	0.18	0.1	0.8	1.16
SWGCP_only_5000/SWlin2006.15758.cnf	0.26	0.82	0.1	0.1	0.34	0.32	0.12	0.38	0.44	0.38	0.12	0.5	0.86	0.54	0.1	0.48	0.28	0.12	0.72	1.56
SWGCP_only_5000/SWlin2006.15759.cnf	0.26	0.84	0.1	0.14	0.52	0.36	0.12	0.36	0.54	0.46	0.14	0.76	0.86	0.68	0.12	0.46	0.2	0.12	0.62	1.82
SWGCP_only_5000/SWlin2006.15760.cnf	0.16	0.34	0.08	0.06	0.3	0.24	0.08	0.22	0.32	0.3	0.08	0.42	0.32	0.3	0.08	0.34	0.2	0.1	0.52	1.02
SWGCP_only_5000/SWlin2006.15761.cnf	0.2	0.04	0.08	0.08	0.3	0.26	0.04	0.04	0.06	0.34	0.1	0.48	0.62	0.34	0.08	0.42	0.2	0.1	0.38	1.0
SWGCP_only_5000/SWlin2006.15762.cnf	0.26	0.4	0.1	0.12	0.38	0.4	0.12	0.28	0.4	0.36	0.12	0.62	0.56	0.46	0.1	0.42	0.26	0.12	0.9	1.72
SWGCP_only_5000/SWlin2006.15763.cnf	0.2	0.3	0.1	0.1	0.4	0.42	0.12	0.4	0.32	0.36	0.12	0.64	0.32	0.3	0.12	0.56	0.22	0.1	0.66	1.82
SWGCP_only_5000/SWlin2006.15764.cnf	0.24	0.5	0.1	0.12	0.34	0.36	0.12	0.34	0.32	0.32	0.12	0.52	0.64	0.44	0.1	0.44	0.26	0.1	0.78	1.86
SWGCP_only_5000/SWlin2006.15765.cnf	0.24	0.6	0.1	0.1	0.36	0.36	0.12	0.4	0.2	0.44	0.12	0.54	0.58	0.52	0.12	0.6	0.32	0.1	0.82	1.66
SWGCP_only_5000/SWlin2006.15766.cnf	0.22	0.44	0.06	0.1	0.32	0.3	0.1	0.26	0.32	0.24	0.12	0.38	0.44	0.38	0.08	0.38	0.22	0.1	0.78	1.12
SWGCP_only_5000/SWlin2006.15767.cnf	0.16	0.12	0.08	0.06	0.32	0.28	0.1	0.28	0.42	0.36	0.1	0.46	0.06	0.12	0.08	0.42	0.24	0.06	0.64	1.04
SWGCP_only_5000/SWlin2006.15768.cnf	0.02	0.2	0.06	0.08	0.26	0.18	0.02	0.02	0.04	0.06	0.08	0.1	0.1	0.36	0.06	0.06	0.02	0.08	0.16	0.76
SWGCP_only_5000/SWlin2006.15769.cnf	0.12	0.38	0.08	0.08	0.26	0.32	0.08	0.32	0.22	0.3	0.08	0.08	0.84	0.5	0.08	0.44	0.24	0.08	0.06	1.28
SWGCP_only_5000/SWlin2006.15770.cnf	0.2	0.26	0.08	0.1	0.38	0.32	0.1	0.28	0.36	0.4	0.1	0.52	0.32	0.3	0.08	0.5	0.22	0.1	0.82	1.34
SWGCP_only_5000/SWlin2006.15771.cnf	0.18	0.32	0.04	0.06	0.26	0.24	0.08	0.22	0.36	0.24	0.06	0.42	0.38	0.4	0.08	0.34	0.2	0.06	0.52	0.84
SWGCP_only_5000/SWlin2006.15772.cnf	0.2	0.6	0.08	0.08	0.28	0.34	0.08	0.3	0.5	0.28	0.12	0.48	0.64	0.6	0.08	0.42	0.26	0.1	0.54	1.28
SWGCP_only_5000/SWlin2006.15773.cnf	0.26	0.04	0.12	0.12	0.36	0.36	0.12	0.34	0.4	0.4	0.14	0.6	0.5	0.42	0.1	0.5	0.26	0.12	0.9	1.8
SWGCP_only_5000/SWlin2006.15774.cnf	0.16	0.58	0.08	0.08	0.16	0.16	0.08	0.28	0.42	0.32	0.1	0.48	0.68	0.46	0.06	0.4	0.24	0.08	0.6	1.06
SWGCP_only_5000/SWlin2006.15775.cnf	0.16	0.06	0.08	0.06	0.22	0.08	0.08	0.1	0.02	0.26	0.1	0.14	0.46	0.12	0.08	0.08	0.18	0.08	0.52	0.72
SWGCP_only_5000/SWlin2006.15776.cnf	0.22	0.4	0.08	0.1	0.38	0.08	0.1	0.22	0.52	0.14	0.12	0.04	0.72	0.5	0.08	0.46	0.12	0.1	0.66	1.26
SWGCP_only_5000/SWlin2006.15777.cnf	0.16	0.14	0.08	0.08	0.32	0.32	0.08	0.26	0.08	0.32	0.12	0.46	0.08	0.54	0.06	0.26	0.24	0.08	0.5	1.14
SWGCP_only_5000/SWlin2006.15778.cnf	0.06	0.06	0.06	0.06	0.18	0.18	0.06	0.06	0.22	0.2	0.08	0.28	0.02	0.12	0.04	0.22	0.12	0.08	0.38	0.58
SWGCP_only_5000/SWlin2006.15779.cnf	0.2	0.62	0.08	0.08	0.3	0.24	0.08	0.24	0.38	0.36	0.08	0.5	0.66	0.3	0.08	0.42	0.22	0.1	0.56	1.04
SWGCP_only_5000/SWlin2006.15780.cnf	0.24	0.42	0.12	0.14	0.4	0.38	0.12	0.34	0.46	0.4	0.14	0.52	0.56	0.52	0.1	0.44	0.2	0.1	0.7	1.64
SWGCP_only_5000/SWlin2006.15781.cnf	0.2	0.6	0.08	0.1	0.3	0.28	0.1	0.32	0.34	0.26	0.1	0.48	0.78	0.44	0.08	0.42	0.24	0.08	0.64	1.1
SWGCP_only_5000/SWlin2006.15782.cnf	0.2	0.54	0.06	0.08	0.32	0.22	0.08	0.28	0.06	0.06	0.1	0.06	0.36	0.08	0.1	0.04	0.22	0.08	0.08	1.04
SWGCP_only_5000/SWlin2006.15783.cnf	0.3	0.58	0.08	0.12	0.4	0.38	0.14	0.18	0.58	0.44	0.14	0.66	0.72	0.52	0.12	0.58	0.32	0.1	1.2	1.92
SWGCP_only_5000/SWlin2006.15784.cnf	0.26	0.62	0.12	0.1	0.42	0.34	0.12	0.36	0.58	0.36	0.12	0.5	0.86	0.44	0.1	0.6	0.3	0.12	1.1	1.74
SWGCP_only_5000/SWlin2006.15785.cnf	0.12	0.08	0.1	0.1	0.38	0.38	0.1	0.34	0.3	0.38	0.1	0.36	0.26	0.34	0.1	0.48	0.24	0.1	0.9	1.34
SWGCP_only_5000/SWlin2006.15786.cnf	0.02	0.06	0.08	0.06	0.16	0.28	0.08	0.12	0.08	0.3	0.1	0.08	0.6	0.52	0.06	0.04	0.24	0.1	0.66	1.04
SWGCP_only_5000/SWlin2006.15787.cnf	0.2	0.56	0.08	0.08	0.3	0.26	0.08	0.24	0.28	0.26	0.1	0.4	0.5	0.44	0.08	0.36	0.2	0.08	0.62	1.0
SWGCP_only_5000/SWlin2006.15788.cnf	0.18	0.44	0.06	0.08	0.32	0.26	0.08	0.26	0.44	0.28	0.1	0.46	0.44	0.4	0.1	0.4	0.2	0.08	0.66	1.1
SWGCP_only_5000/SWlin2006.15789.cnf	0.12	0.22	0.06	0.06	0.18	0.2	0.06	0.16	0.2	0.22	0.08	0.28	0.32	0.24	0.06	0.26	0.14	0.06	0.42	0.66
SWGCP_only_5000/SWlin2006.15790.cnf	0.04	0.06	0.04	0.08	0.02	0.2	0.06	0.06	0.2	0.02	0.08	0.32	0.42	0.02	0.06	0.24	0.16	0.08	0.14	0.6
SWGCP_only_5000/SWlin2006.15791.cnf	0.16	0.22	0.1	0.08	0.38	0.34	0.12	0.34	0.54	0.36	0.1	0.48	0.56	0.56	0.1	0.52	0.28	0.1	0.94	1.4
SWGCP_only_5000/SWlin2006.15792.cnf	0.14	0.48	0.06	0.06	0.24	0.24	0.08	0.2	0.34	0.2	0.1	0.4	0.52	0.38	0.08	0.26	0.2	0.1	0.5	0.78
SWGCP_only_5000/SWlin2006.15793.cnf	0.22	0.32	0.1	0.1	0.34	0.3	0.12	0.28	0.36	0.32	0.12	0.52	0.42	0.32	0.08	0.36	0.26	0.1	0.8	1.44
SWGCP_only_5000/SWlin2006.15794.cnf	0.2	0.66	0.1	0.06	0.32	0.28	0.1	0.28	0.3	0.34	0.1	0.56	0.56	0.5	0.1	0.42	0.22	0.1	0.74	1.02
SWGCP_only_5000/SWlin2006.15795.cnf	0.28	0.42	0.08	0.12	0.42	0.4	0.14	0.34	0.42	0.34	0.1	0.58	0.74	0.46	0.12	0.48	0.28	0.1	0.86	1.88
SWGCP_only_5000/SWlin2006.15796.cnf	0.12	0.18	0.06	0.06	0.16	0.16	0.06	0.14	0.18	0.16	0.06	0.24	0.24	0.16	0.06	0.2	0.14	0.08	0.32	0.5
SWGCP_only_5000/SWlin2006.15797.cnf	0.22	0.28	0.1	0.1	0.4	0.38	0.1	0.14	0.44	0.08	0.12	0.52	0.86	0.6	0.1	0.44	0.24	0.12	0.82	1.36
SWGCP_only_5000/SWlin2006.15798.cnf	0.24	0.54	0.08	0.08	0.36	0.4	0.1	0.22	0.44	0.3	0.1	0.56	0.64	0.5	0.06	0.44	0.26	0.1	0.88	1.24
SWGCP_only_5000/SWlin2006.15799.cnf	0.24	0.76	0.08	0.1	0.38	0.16	0.1	0.08	0.1	0.32	0.12	0.5	0.54	0.54	0.08	0.4	0.28	0.08	0.56	1.42
SWGCP_only_5000/SWlin2006.15800.cnf	0.14	0.18	0.1	0.08	0.24	0.32	0.1	0.34	0.3	0.44	0.12	0.58	0.96	0.62	0.1	0.1	0.28	0.1	0.64	1.46
SWGCP_only_5000/SWlin2006.15801.cnf	0.24	0.74	0.12	0.14	0.54	0.48	0.14	0.42	0.44	0.46	0.14	0.72	0.68	0.62	0.12	0.36	0.3	0.12	1.16	2.0
SWGCP_only_5000/SWlin2006.15802.cnf	0.06	0.1	0.04	0.06	0.22	0.02	0.08	0.24	0.04	0.2	0.08	0.18	0.02	0.02	0.08	0.08	0.18	0.08	0.54	0.8
SWGCP_only_5000/SWlin2006.15803.cnf	0.18	0.26	0.1	0.08	0.34	0.34	0.1	0.32	0.26	0.32	0.1	0.56	0.36	0.28	0.1	0.4	0.18	0.1	0.72	1.36
SWGCP_only_5000/SWlin2006.15804.cnf	0.1	0.16	0.06	0.04	0.16	0.14	0.08	0.12	0.16	0.16	0.08	0.2	0.22	0.14	0.04	0.2	0.12	0.06	0.3	0.52
SWGCP_only_5000/SWlin2006.15805.cnf	0.06	0.02	0.08	0.06	0.1	0.02	0.08	0.02	0.14	0.12	0.08	0.36	0.04	0.08	0.08	0.3	0.08	0.08	0.04	0.72
SWGCP_only_5000/SWlin2006.15806.cnf	0.22	0.26	0.08	0.1	0.34	0.34	0.1	0.34	0.54	0.3	0.1	0.56	0.78	0.52	0.08	0.44	0.26	0.1	0.68	1.3
SWGCP_only_5000/SWlin2006.15807.cnf	0.16	0.04	0.06	0.08	0.02	0.28	0.06	0.06	0.02	0.08	0.08	0.46	0.06	0.08	0.08	0.04	0.02	0.1	0.28	0.9
SWGCP_only_5000/SWlin2006.15808.cnf	0.2	0.4	0.06	0.1	0.32	0.32	0.08	0.28	0.32	0.32	0.1	0.46	0.54	0.34	0.08	0.34	0.24	0.1	0.7	1.24
SWGCP_only_5000/SWlin2006.15809.cnf	0.04	0.52	0.08	0.08	0.34	0.36	0.1	0.3	0.04	0.38	0.1	0.5	0.08	0.48	0.1	0.44	0.26	0.1	0.42	1.28
SWGCP_only_5000/SWlin2006.15810.cnf	0.24	0.76	0.08	0.08	0.38	0.38	0.1	0.24	0.34	0.38	0.12	0.64	0.64	0.46	0.1	0.46	0.24	0.1	0.76	1.38
SWGCP_only_5000/SWlin2006.15811.cnf	0.2	0.12	0.08	0.08	0.38	0.32	0.1	0.36	0.36	0.42	0.12	0.4	0.28	0.46	0.1	0.5	0.28	0.08	0.76	1.48
SWGCP_only_5000/SWlin2006.15812.cnf	0.26	0.4	0.1	0.12	0.4	0.38	0.12	0.44	0.36	0.34	0.12	0.48	0.6	0.48	0.12	0.56	0.32	0.12	0.82	1.94
SWGCP_only_5000/SWlin2006.15813.cnf	0.08	0.28	0.06	0.08	0.28	0.24	0.1	0.24	0.0	0.06	0.08	0.34	0.04	0.36	0.06	0.34	0.2	0.08	0.48	0.84
SWGCP_only_5000/SWlin2006.15814.cnf	0.22	0.12	0.1	0.1	0.36	0.38	0.12	0.38	0.14	0.42	0.14	0.52	0.7	0.58	0.1	0.18	0.34	0.1	0.96	1.82
SWGCP_only_5000/SWlin2006.15815.cnf	0.24	0.82	0.1	0.1	0.46	0.42	0.12	0.38	0.42	0.48	0.12	0.58	1.08	0.5	0.12	0.6	0.28	0.1	0.72	1.64
SWGCP_only_5000/SWlin2006.15816.cnf	0.26	0.86	0.1	0.12	0.38	0.38	0.08	0.3	0.44	0.14	0.12	0.16	0.48	0.66	0.1	0.14	0.26	0.12	0.76	1.6
SWGCP_only_5000/SWlin2006.15817.cnf	0.26	0.12	0.1	0.1	0.28	0.2	0.12	0.3	0.14	0.44	0.12	0.56	0.86	0.64	0.12	0.42	0.26	0.08	1.06	1.58
SWGCP_only_5000/SWlin2006.15818.cnf	0.22	0.68	0.08	0.08	0.34	0.34	0.12	0.3	0.38	0.38	0.12	0.5	0.7	0.46	0.08	0.46	0.26	0.1	0.76	1.28
SWGCP_only_5000/SWlin2006.15819.cnf	0.24	0.36	0.1	0.1	0.4	0.36	0.1	0.38	0.4	0.36	0.12	0.46	0.6	0.42	0.1	0.44	0.28	0.12	0.76	1.74
SWGCP_only_5000/SWlin2006.15820.cnf	0.1	0.98	0.1	0.1	0.54	0.44	0.12	0.4	0.64	0.48	0.14	0.64	0.56	0.5	0.1	0.4	0.28	0.12	0.96	1.88
SWGCP_only_5000/SWlin2006.15821.cnf	0.2	0.62	0.1	0.06	0.32	0.3	0.12	0.3	0.32	0.34	0.1	0.56	0.54	0.32	0.08	0.38	0.24	0.08	0.68	1.14
SWGCP_only_5000/SWlin2006.15822.cnf	0.2	0.6	0.08	0.06	0.36	0.34	0.12	0.32	0.08	0.3	0.1	0.56	0.1	0.48	0.08	0.16	0.28	0.12	0.68	1.28
SWGCP_only_5000/SWlin2006.15823.cnf	0.1	0.3	0.04	0.06	0.16	0.14	0.06	0.14	0.2	0.16	0.04	0.22	0.24	0.22	0.06	0.18	0.12	0.06	0.34	0.42
SWGCP_only_5000/SWlin2006.15824.cnf	0.24	0.4	0.1	0.12	0.36	0.36	0.12	0.34	0.44	0.36	0.16	0.58	0.54	0.38	0.12	0.5	0.28	0.12	0.82	1.74
SWGCP_only_5000/SWlin2006.15825.cnf	0.24	0.46	0.1	0.14	0.08	0.42	0.12	0.42	0.42	0.36	0.12	0.6	0.64	0.14	0.12	0.52	0.24	0.1	0.48	1.68
SWGCP_only_5000/SWlin2006.15826.cnf	0.28	0.92	0.12	0.12	0.46	0.46	0.14	0.46	0.68	0.34	0.14	0.72	1.16	0.48	0.12	0.62	0.32	0.1	0.96	1.98
SWGCP_only_5000/SWlin2006.15827.cnf	0.22	0.72	0.06	0.1	0.2	0.06	0.12	0.14	0.5	0.34	0.1	0.54	0.3	0.48	0.08	0.38	0.24	0.1	0.14	1.22
SWGCP_only_5000/SWlin2006.15828.cnf	0.3	0.42	0.08	0.12	0.46	0.44	0.12	0.38	0.34	0.44	0.14	0.74	0.58	0.62	0.12	0.58	0.32	0.12	0.92	1.92
SWGCP_only_5000/SWlin2006.15829.cnf	0.16	0.22	0.08	0.1	0.32	0.26	0.08	0.24	0.28	0.34	0.1	0.44	0.26	0.24	0.08	0.32	0.18	0.1	0.64	1.2
SWGCP_only_5000/SWlin2006.15830.cnf	0.16	0.32	0.08	0.08	0.24	0.22	0.08	0.18	0.26	0.22	0.08	0.3	0.42	0.26	0.08	0.28	0.18	0.08	0.48	0.74
SWGCP_only_5000/SWlin2006.15831.cnf	0.2	0.12	0.1	0.1	0.3	0.34	0.1	0.3	0.04	0.38	0.1	0.56	0.74	0.08	0.08	0.44	0.26	0.1	0.82	1.24
SWGCP_only_5000/SWlin2006.15832.cnf	0.1	0.12	0.08	0.06	0.14	0.16	0.06	0.12	0.14	0.16	0.06	0.2	0.16	0.16	0.04	0.2	0.1	0.08	0.28	0.52
SWGCP_only_5000/SWlin2006.15833.cnf	0.2	0.08	0.06	0.08	0.3	0.24	0.1	0.26	0.14	0.12	0.1	0.1	0.08	0.18	0.06	0.16	0.12	0.08	0.64	0.96
SWGCP_only_5000/SWlin2006.15834.cnf	0.02	0.0	0.06	0.06	0.0	0.2	0.04	0.12	0.0	0.02	0.04	0.1	0.46	0.28	0.02	0.0	0.02	0.06	0.02	0.62
SWGCP_only_5000/SWlin2006.15835.cnf	0.26	0.88	0.12	0.12	0.44	0.4	0.12	0.4	0.24	0.44	0.12	0.58	0.22	0.82	0.1	0.5	0.32	0.14	0.72	1.86
SWGCP_only_5000/SWlin2006.15836.cnf	0.12	0.34	0.06	0.06	0.18	0.2	0.08	0.18	0.26	0.16	0.08	0.28	0.42	0.28	0.08	0.26	0.12	0.06	0.44	0.58
SWGCP_only_5000/SWlin2006.15837.cnf	0.26	0.48	0.1	0.1	0.42	0.34	0.14	0.34	0.4	0.4	0.12	0.48	0.6	0.5	0.1	0.66	0.32	0.12	0.76	1.78
SWGCP_only_5000/SWlin2006.15838.cnf	0.24	0.18	0.1	0.08	0.38	0.36	0.1	0.32	0.38	0.14	0.14	0.6	0.1	0.56	0.08	0.54	0.3	0.1	0.74	1.42
SWGCP_only_5000/SWlin2006.15839.cnf	0.24	0.24	0.1	0.1	0.46	0.46	0.12	0.16	0.56	0.36	0.12	0.6	1.02	0.6	0.08	0.52	0.26	0.1	0.84	1.6
SWGCP_only_5000/SWlin2006.15840.cnf	0.26	0.42	0.1	0.1	0.42	0.4	0.12	0.44	0.36	0.38	0.1	0.52	1.12	0.54	0.12	0.54	0.28	0.1	0.7	1.94
SWGCP_only_5000/SWlin2006.15841.cnf	0.24	0.36	0.1	0.08	0.36	0.3	0.12	0.1	0.48	0.38	0.14	0.54	0.56	0.54	0.1	0.46	0.26	0.12	0.74	1.24
SWGCP_only_5000/SWlin2006.15842.cnf	0.16	0.02	0.08	0.06	0.3	0.06	0.08	0.24	0.36	0.2	0.08	0.3	0.5	0.3	0.08	0.32	0.2	0.08	0.64	0.92
SWGCP_only_5000/SWlin2006.15843.cnf	0.14	0.36	0.06	0.06	0.24	0.2	0.06	0.18	0.3	0.24	0.06	0.34	0.52	0.36	0.08	0.28	0.18	0.08	0.44	0.68
SWGCP_only_5000/SWlin2006.15844.cnf	0.24	0.12	0.12	0.12	0.42	0.38	0.12	0.38	0.58	0.32	0.14	0.68	0.44	0.4	0.1	0.5	0.32	0.14	0.98	1.88
SWGCP_only_5000/SWlin2006.15845.cnf	0.18	0.12	0.06	0.08	0.3	0.16	0.08	0.22	0.02	0.06	0.1	0.48	0.06	0.08	0.06	0.34	0.2	0.08	0.5	0.94
SWGCP_only_5000/SWlin2006.15846.cnf	0.16	0.32	0.06	0.06	0.26	0.2	0.06	0.2	0.32	0.24	0.06	0.34	0.36	0.24	0.06	0.26	0.16	0.08	0.48	0.78
SWGCP_only_5000/SWlin2006.15847.cnf	0.18	0.34	0.08	0.08	0.34	0.32	0.1	0.28	0.38	0.3	0.1	0.44	0.42	0.38	0.08	0.38	0.26	0.08	0.74	1.16
SWGCP_only_5000/SWlin2006.15848.cnf	0.16	0.4	0.08	0.06	0.24	0.2	0.04	0.18	0.28	0.22	0.08	0.3	0.44	0.28	0.08	0.26	0.16	0.08	0.46	0.66
SWGCP_only_5000/SWlin2006.15849.cnf	0.16	0.46	0.06	0.08	0.3	0.26	0.08	0.3	0.42	0.32	0.08	0.5	0.64	0.46	0.08	0.38	0.22	0.1	0.6	1.04
SWGCP_only_5000/SWlin2006.15850.cnf	0.06	0.08	0.08	0.06	0.24	0.2	0.08	0.2	0.18	0.26	0.06	0.38	0.04	0.36	0.08	0.3	0.2	0.1	0.26	0.74
SWGCP_only_5000/SWlin2006.15851.cnf	0.24	0.52	0.12	0.1	0.36	0.34	0.12	0.42	0.3	0.44	0.14	0.66	0.58	0.42	0.1	0.42	0.34	0.12	0.88	1.78
SWGCP_only_5000/SWlin2006.15852.cnf	0.14	0.38	0.06	0.06	0.22	0.22	0.06	0.2	0.28	0.26	0.06	0.28	0.48	0.32	0.06	0.26	0.18	0.08	0.48	0.66
SWGCP_only_5000/SWlin2006.15853.cnf	0.2	0.82	0.08	0.12	0.14	0.42	0.1	0.1	0.38	0.4	0.12	0.7	1.0	0.58	0.1	0.2	0.3	0.12	0.62	1.6
SWGCP_only_5000/SWlin2006.15854.cnf	0.24	0.8	0.1	0.08	0.38	0.38	0.1	0.32	0.06	0.36	0.1	0.46	0.38	0.1	0.1	0.5	0.16	0.08	0.76	1.36
SWGCP_only_5000/SWlin2006.15855.cnf	0.0	0.04	0.04	0.06	0.0	0.02	0.02	0.08	0.0	0.02	0.06	0.0	0.02	0.04	0.02	0.0	0.02	0.06	0.02	0.5
SWGCP_only_5000/SWlin2006.15856.cnf	0.22	0.62	0.08	0.08	0.38	0.22	0.1	0.14	0.2	0.26	0.12	0.56	0.16	0.06	0.08	0.44	0.1	0.1	0.72	1.24
SWGCP_only_5000/SWlin2006.15857.cnf	0.16	0.22	0.06	0.08	0.2	0.02	0.08	0.24	0.28	0.3	0.08	0.38	0.04	0.22	0.06	0.02	0.2	0.08	0.18	0.92
SWGCP_only_5000/SWlin2006.15858.cnf	0.24	0.62	0.1	0.1	0.4	0.42	0.12	0.28	0.56	0.36	0.1	0.56	0.68	0.64	0.1	0.48	0.16	0.12	0.68	1.5
SWGCP_only_5000/SWlin2006.15859.cnf	0.2	0.22	0.06	0.08	0.32	0.3	0.06	0.08	0.06	0.16	0.08	0.46	0.32	0.34	0.08	0.14	0.14	0.08	0.76	1.08
SWGCP_only_5000/SWlin2006.15860.cnf	0.24	0.68	0.08	0.12	0.4	0.4	0.12	0.36	0.5	0.4	0.12	0.48	0.96	0.16	0.08	0.5	0.26	0.08	0.3	1.4
SWGCP_only_5000/SWlin2006.15861.cnf	0.18	0.44	0.08	0.08	0.26	0.28	0.1	0.26	0.36	0.3	0.1	0.32	0.46	0.36	0.06	0.34	0.2	0.08	0.6	0.9
SWGCP_only_5000/SWlin2006.15862.cnf	0.12	0.02	0.04	0.04	0.2	0.1	0.06	0.18	0.0	0.1	0.08	0.1	0.02	0.26	0.02	0.12	0.08	0.08	0.12	0.52
SWGCP_only_5000/SWlin2006.15863.cnf	0.0	0.0	0.02	0.04	0.1	0.18	0.04	0.02	0.0	0.04	0.04	0.02	0.0	0.24	0.0	0.0	0.0	0.06	0.16	0.5
SWGCP_only_5000/SWlin2006.15864.cnf	0.22	0.48	0.1	0.1	0.38	0.34	0.1	0.36	0.4	0.36	0.12	0.54	0.7	0.5	0.1	0.44	0.28	0.1	0.68	1.54
SWGCP_only_5000/SWlin2006.15865.cnf	0.18	0.22	0.08	0.06	0.22	0.24	0.08	0.2	0.24	0.22	0.08	0.4	0.22	0.22	0.08	0.3	0.14	0.08	0.44	0.88
SWGCP_only_5000/SWlin2006.15866.cnf	0.26	0.54	0.1	0.1	0.38	0.42	0.12	0.38	0.44	0.48	0.12	0.48	0.5	0.38	0.1	0.56	0.28	0.12	0.86	1.88
SWGCP_only_5000/SWlin2006.15867.cnf	0.22	0.32	0.08	0.06	0.22	0.32	0.06	0.3	0.34	0.32	0.08	0.54	0.8	0.44	0.08	0.36	0.2	0.1	0.54	1.12
SWGCP_only_5000/SWlin2006.15868.cnf	0.24	0.36	0.08	0.14	0.38	0.46	0.14	0.38	0.5	0.52	0.12	0.8	1.02	0.58	0.1	0.54	0.32	0.1	1.0	1.9
SWGCP_only_5000/SWlin2006.15869.cnf	0.2	0.44	0.08	0.08	0.28	0.32	0.08	0.28	0.44	0.36	0.1	0.46	0.62	0.4	0.06	0.1	0.24	0.1	0.72	1.08
SWGCP_only_5000/SWlin2006.15870.cnf	0.32	0.76	0.12	0.12	0.4	0.44	0.12	0.38	0.52	0.52	0.14	0.64	0.6	0.4	0.1	0.62	0.32	0.12	1.02	1.86
SWGCP_only_5000/SWlin2006.15871.cnf	0.16	0.56	0.08	0.08	0.34	0.32	0.12	0.36	0.24	0.32	0.12	0.6	0.16	0.4	0.08	0.44	0.28	0.1	0.5	1.48
SWGCP_only_5000/SWlin2006.15872.cnf	0.22	0.6	0.1	0.06	0.34	0.36	0.12	0.3	0.48	0.32	0.1	0.5	0.74	0.42	0.1	0.46	0.22	0.1	0.84	1.22
SWGCP_only_5000/SWlin2006.15873.cnf	0.28	0.58	0.12	0.08	0.38	0.36	0.12	0.32	0.62	0.46	0.14	0.56	0.72	0.6	0.1	0.46	0.36	0.12	0.66	1.86
SWGCP_only_5000/SWlin2006.15874.cnf	0.12	0.18	0.06	0.04	0.16	0.14	0.06	0.16	0.14	0.16	0.04	0.2	0.22	0.18	0.06	0.18	0.12	0.08	0.3	0.48
SWGCP_only_5000/SWlin2006.15875.cnf	0.24	0.56	0.08	0.08	0.36	0.32	0.08	0.36	0.38	0.42	0.12	0.6	0.74	0.5	0.1	0.46	0.28	0.1	0.96	1.38
SWGCP_only_5000/SWlin2006.15876.cnf	0.14	0.4	0.04	0.08	0.2	0.18	0.08	0.18	0.28	0.22	0.08	0.36	0.46	0.3	0.06	0.28	0.16	0.08	0.48	0.62
SWGCP_only_5000/SWlin2006.15877.cnf	0.16	0.32	0.04	0.08	0.26	0.28	0.1	0.26	0.36	0.28	0.1	0.4	0.56	0.32	0.08	0.34	0.2	0.1	0.54	1.02
SWGCP_only_5000/SWlin2006.15878.cnf	0.1	0.62	0.06	0.08	0.28	0.32	0.1	0.26	0.34	0.34	0.1	0.04	0.26	0.46	0.08	0.04	0.24	0.1	0.66	1.0
SWGCP_only_5000/SWlin2006.15879.cnf	0.24	0.34	0.08	0.12	0.36	0.36	0.1	0.36	0.42	0.42	0.14	0.34	0.6	0.44	0.1	0.46	0.26	0.12	0.68	1.96
SWGCP_only_5000/SWlin2006.15880.cnf	0.12	0.32	0.06	0.08	0.16	0.14	0.04	0.14	0.22	0.18	0.08	0.24	0.4	0.22	0.06	0.22	0.14	0.06	0.36	0.44
SWGCP_only_5000/SWlin2006.15881.cnf	0.14	0.16	0.06	0.06	0.2	0.2	0.08	0.18	0.18	0.22	0.08	0.34	0.18	0.2	0.08	0.26	0.14	0.08	0.46	0.7
SWGCP_only_5000/SWlin2006.15882.cnf	0.18	0.6	0.08	0.08	0.34	0.28	0.1	0.28	0.04	0.34	0.08	0.44	0.1	0.16	0.06	0.42	0.24	0.1	0.7	1.02
SWGCP_only_5000/SWlin2006.15883.cnf	0.16	0.42	0.08	0.08	0.08	0.08	0.06	0.14	0.04	0.08	0.1	0.04	0.04	0.0	0.04	0.1	0.02	0.08	0.44	0.7
SWGCP_only_5000/SWlin2006.15884.cnf	0.14	0.52	0.08	0.08	0.32	0.32	0.1	0.26	0.04	0.18	0.12	0.06	0.52	0.52	0.08	0.06	0.2	0.1	0.62	1.2
SWGCP_only_5000/SWlin2006.15885.cnf	0.24	0.24	0.08	0.1	0.4	0.34	0.12	0.4	0.12	0.46	0.14	0.5	0.72	0.5	0.12	0.48	0.28	0.12	0.78	1.54
SWGCP_only_5000/SWlin2006.15886.cnf	0.18	0.24	0.12	0.1	0.3	0.28	0.1	0.28	0.26	0.34	0.1	0.38	0.3	0.24	0.1	0.44	0.16	0.12	0.58	1.38
SWGCP_only_5000/SWlin2006.15887.cnf	0.28	0.66	0.12	0.14	0.56	0.42	0.14	0.38	0.5	0.44	0.12	0.66	0.88	0.74	0.14	0.62	0.28	0.12	0.74	2.0
SWGCP_only_5000/SWlin2006.15888.cnf	0.16	0.32	0.06	0.08	0.26	0.24	0.08	0.22	0.32	0.24	0.1	0.32	0.42	0.32	0.06	0.3	0.18	0.08	0.5	0.82
SWGCP_only_5000/SWlin2006.15889.cnf	0.32	0.74	0.1	0.12	0.42	0.48	0.14	0.5	0.44	0.52	0.12	0.6	0.86	0.62	0.1	0.48	0.32	0.12	1.04	1.96
SWGCP_only_5000/SWlin2006.15890.cnf	0.22	0.26	0.08	0.08	0.3	0.32	0.14	0.28	0.28	0.38	0.1	0.56	0.32	0.26	0.1	0.42	0.22	0.1	0.74	1.52
SWGCP_only_5000/SWlin2006.15891.cnf	0.24	0.62	0.1	0.12	0.44	0.38	0.12	0.38	0.62	0.42	0.12	0.52	0.76	0.5	0.1	0.56	0.26	0.1	1.08	1.64
SWGCP_only_5000/SWlin2006.15892.cnf	0.24	0.48	0.1	0.1	0.36	0.42	0.12	0.36	0.46	0.4	0.12	0.74	1.0	0.18	0.1	0.58	0.3	0.1	0.78	1.6
SWGCP_only_5000/SWlin2006.15893.cnf	0.22	0.26	0.1	0.12	0.4	0.4	0.1	0.32	0.36	0.4	0.12	0.54	0.36	0.34	0.1	0.44	0.26	0.1	0.82	1.58
SWGCP_only_5000/SWlin2006.15894.cnf	0.18	0.66	0.1	0.08	0.38	0.08	0.12	0.4	0.42	0.42	0.14	0.64	0.12	0.54	0.1	0.48	0.28	0.1	0.68	1.48
SWGCP_only_5000/SWlin2006.15895.cnf	0.24	0.48	0.1	0.1	0.32	0.34	0.1	0.3	0.1	0.32	0.12	0.66	0.8	0.4	0.1	0.5	0.16	0.08	0.86	1.44
SWGCP_only_5000/SWlin2006.15896.cnf	0.14	0.28	0.06	0.06	0.22	0.2	0.06	0.18	0.24	0.22	0.06	0.32	0.38	0.24	0.06	0.28	0.16	0.08	0.42	0.72
SWGCP_only_5000/SWlin2006.15897.cnf	0.16	0.04	0.06	0.06	0.04	0.18	0.06	0.22	0.08	0.26	0.08	0.42	0.02	0.38	0.08	0.34	0.2	0.08	0.48	0.84
SWGCP_only_5000/SWlin2006.15898.cnf	0.14	0.32	0.06	0.06	0.2	0.2	0.08	0.18	0.24	0.18	0.08	0.36	0.42	0.28	0.06	0.26	0.16	0.06	0.48	0.6
SWGCP_only_5000/SWlin2006.15899.cnf	0.3	0.12	0.1	0.12	0.38	0.42	0.08	0.32	0.24	0.4	0.14	0.66	0.98	0.32	0.12	0.54	0.28	0.12	0.6	1.62
SWGCP_only_5000/SWlin2006.15900.cnf	0.24	0.46	0.1	0.1	0.42	0.38	0.12	0.36	0.5	0.44	0.12	0.64	0.12	0.56	0.1	0.5	0.28	0.12	0.8	1.6
SWGCP_only_5000/SWlin2006.15901.cnf	0.22	0.8	0.1	0.1	0.42	0.32	0.08	0.28	0.54	0.34	0.12	0.5	0.72	0.46	0.12	0.52	0.26	0.1	0.76	1.42
SWGCP_only_5000/SWlin2006.15902.cnf	0.04	0.48	0.06	0.06	0.22	0.26	0.04	0.2	0.1	0.26	0.08	0.04	0.58	0.38	0.08	0.18	0.04	0.08	0.4	0.8
SWGCP_only_5000/SWlin2006.15903.cnf	0.1	0.2	0.04	0.06	0.16	0.14	0.06	0.12	0.16	0.14	0.06	0.2	0.22	0.18	0.04	0.18	0.12	0.06	0.28	0.44
SWGCP_only_5000/SWlin2006.15904.cnf	0.24	0.44	0.08	0.1	0.4	0.34	0.12	0.32	0.5	0.42	0.1	0.46	0.2	0.18	0.08	0.46	0.22	0.12	0.96	1.48
SWGCP_only_5000/SWlin2006.15905.cnf	0.2	0.3	0.08	0.12	0.38	0.36	0.12	0.3	0.3	0.44	0.1	0.5	0.36	0.28	0.08	0.44	0.18	0.12	0.92	1.52
SWGCP_only_5000/SWlin2006.15906.cnf	0.26	0.68	0.12	0.12	0.56	0.42	0.14	0.42	0.54	0.38	0.12	0.72	0.52	0.16	0.12	0.58	0.32	0.12	0.68	2.0
SWGCP_only_5000/SWlin2006.15907.cnf	0.22	0.42	0.1	0.1	0.38	0.36	0.1	0.34	0.5	0.1	0.1	0.2	0.66	0.58	0.08	0.48	0.28	0.12	0.76	1.38
SWGCP_only_5000/SWlin2006.15908.cnf	0.04	0.22	0.06	0.08	0.14	0.04	0.08	0.2	0.34	0.02	0.1	0.34	0.52	0.22	0.08	0.34	0.18	0.08	0.46	0.8
SWGCP_only_5000/SWlin2006.15909.cnf	0.22	0.9	0.1	0.1	0.4	0.34	0.12	0.38	0.58	0.38	0.12	0.66	1.0	0.4	0.12	0.4	0.34	0.1	0.96	1.82
SWGCP_only_5000/SWlin2006.15910.cnf	0.2	0.22	0.1	0.1	0.4	0.38	0.08	0.32	0.26	0.38	0.1	0.6	0.3	0.28	0.08	0.52	0.2	0.1	0.72	1.48
SWGCP_only_5000/SWlin2006.15911.cnf	0.28	0.16	0.1	0.1	0.4	0.44	0.14	0.12	0.42	0.46	0.14	0.52	0.26	0.14	0.12	0.56	0.34	0.12	0.88	1.74
SWGCP_only_5000/SWlin2006.15912.cnf	0.24	0.64	0.1	0.1	0.36	0.44	0.12	0.4	0.56	0.36	0.12	0.56	0.72	0.58	0.1	0.52	0.28	0.1	0.82	1.72
SWGCP_only_5000/SWlin2006.15913.cnf	0.24	0.32	0.1	0.12	0.4	0.44	0.14	0.32	0.42	0.42	0.12	0.48	0.44	0.36	0.12	0.52	0.24	0.14	0.8	1.98
SWGCP_only_5000/SWlin2006.15914.cnf	0.26	0.74	0.12	0.1	0.46	0.5	0.12	0.4	0.46	0.48	0.14	0.6	0.78	0.48	0.1	0.56	0.26	0.12	0.78	1.68
SWGCP_only_5000/SWlin2006.15915.cnf	0.14	0.34	0.04	0.04	0.2	0.18	0.06	0.16	0.26	0.22	0.08	0.3	0.4	0.28	0.06	0.26	0.14	0.08	0.44	0.54
SWGCP_only_5000/SWlin2006.15916.cnf	0.2	0.64	0.08	0.06	0.3	0.28	0.1	0.24	0.04	0.26	0.08	0.52	0.3	0.46	0.08	0.4	0.26	0.1	0.7	1.04
SWGCP_only_5000/SWlin2006.15917.cnf	0.18	0.28	0.06	0.08	0.32	0.3	0.1	0.28	0.32	0.34	0.1	0.44	0.28	0.28	0.1	0.36	0.22	0.1	0.64	1.08
SWGCP_only_5000/SWlin2006.15918.cnf	0.28	0.46	0.1	0.12	0.54	0.36	0.14	0.4	0.56	0.12	0.14	0.52	0.96	0.56	0.12	0.48	0.32	0.12	1.02	1.88
SWGCP_only_5000/SWlin2006.15919.cnf	0.2	0.08	0.08	0.08	0.14	0.06	0.04	0.06	0.32	0.32	0.08	0.46	0.64	0.1	0.08	0.34	0.04	0.1	0.74	1.02
SWGCP_only_5000/SWlin2006.15920.cnf	0.22	0.5	0.1	0.1	0.38	0.36	0.1	0.32	0.52	0.36	0.14	0.54	0.78	0.44	0.1	0.5	0.3	0.08	0.74	1.58
SWGCP_only_5000/SWlin2006.15921.cnf	0.26	0.48	0.1	0.12	0.14	0.4	0.1	0.36	0.4	0.34	0.12	0.58	0.62	0.5	0.1	0.48	0.22	0.08	0.74	1.66
SWGCP_only_5000/SWlin2006.15922.cnf	0.22	0.58	0.08	0.1	0.18	0.44	0.1	0.34	0.06	0.38	0.1	0.48	0.5	0.46	0.1	0.4	0.22	0.1	0.58	1.48
SWGCP_only_5000/SWlin2006.15923.cnf	0.18	0.5	0.08	0.08	0.1	0.04	0.08	0.24	0.02	0.28	0.1	0.38	0.58	0.4	0.04	0.2	0.08	0.08	0.42	0.82
SWGCP_only_5000/SWlin2006.15924.cnf	0.24	0.46	0.1	0.1	0.3	0.42	0.1	0.32	0.48	0.4	0.14	0.5	0.74	0.48	0.1	0.2	0.28	0.1	0.84	1.54
SWGCP_only_5000/SWlin2006.15925.cnf	0.18	0.12	0.06	0.08	0.16	0.16	0.08	0.12	0.42	0.34	0.08	0.36	0.62	0.42	0.08	0.08	0.2	0.08	0.58	1.04
SWGCP_only_5000/SWlin2006.15926.cnf	0.2	0.24	0.1	0.12	0.3	0.38	0.14	0.32	0.34	0.4	0.12	0.54	0.36	0.28	0.1	0.48	0.22	0.12	0.74	1.84
SWGCP_only_5000/SWlin2006.15927.cnf	0.14	0.34	0.06	0.06	0.22	0.22	0.08	0.18	0.22	0.22	0.08	0.34	0.38	0.28	0.08	0.28	0.18	0.08	0.46	0.68
SWGCP_only_5000/SWlin2006.15928.cnf	0.24	0.48	0.08	0.1	0.4	0.44	0.1	0.14	0.36	0.44	0.08	0.7	0.1	0.3	0.1	0.6	0.3	0.1	0.72	1.62
SWGCP_only_5000/SWlin2006.15929.cnf	0.22	0.82	0.08	0.1	0.46	0.34	0.12	0.34	0.38	0.4	0.12	0.6	0.9	0.42	0.08	0.22	0.22	0.12	1.02	1.5
SWGCP_only_5000/SWlin2006.15930.cnf	0.26	0.48	0.1	0.1	0.5	0.36	0.12	0.42	0.46	0.44	0.14	0.7	0.56	0.7	0.12	0.74	0.38	0.14	0.88	2.02
SWGCP_only_5000/SWlin2006.15931.cnf	0.14	0.26	0.04	0.06	0.18	0.14	0.06	0.16	0.18	0.18	0.06	0.24	0.3	0.22	0.06	0.2	0.14	0.06	0.38	0.54
SWGCP_only_5000/SWlin2006.15932.cnf	0.24	0.48	0.06	0.08	0.3	0.2	0.1	0.06	0.36	0.3	0.1	0.42	0.58	0.04	0.06	0.4	0.04	0.08	0.7	0.94
SWGCP_only_5000/SWlin2006.15933.cnf	0.28	0.68	0.12	0.14	0.54	0.12	0.14	0.44	0.66	0.58	0.14	0.74	1.08	0.56	0.12	0.62	0.32	0.14	0.76	1.98
SWGCP_only_5000/SWlin2006.15934.cnf	0.28	0.54	0.12	0.1	0.4	0.42	0.1	0.36	0.42	0.5	0.12	0.44	0.4	0.68	0.1	0.6	0.32	0.12	1.04	1.66
SWGCP_only_5000/SWlin2006.15935.cnf	0.1	0.54	0.1	0.1	0.36	0.42	0.12	0.4	0.16	0.46	0.1	0.12	0.98	0.46	0.1	0.54	0.3	0.12	1.0	1.6
SWGCP_only_5000/SWlin2006.15936.cnf	0.2	0.54	0.08	0.08	0.34	0.32	0.1	0.3	0.42	0.36	0.12	0.42	0.72	0.4	0.08	0.42	0.26	0.12	0.68	1.14
SWGCP_only_5000/SWlin2006.15937.cnf	0.12	0.22	0.06	0.08	0.18	0.18	0.06	0.16	0.22	0.18	0.06	0.28	0.32	0.22	0.04	0.24	0.14	0.08	0.32	0.56
SWGCP_only_5000/SWlin2006.15938.cnf	0.24	0.1	0.08	0.08	0.32	0.34	0.1	0.3	0.5	0.36	0.1	0.08	0.6	0.26	0.1	0.4	0.2	0.1	0.9	1.26
SWGCP_only_5000/SWlin2006.15939.cnf	0.16	0.32	0.08	0.1	0.36	0.3	0.1	0.14	0.48	0.16	0.1	0.48	0.52	0.44	0.08	0.42	0.12	0.08	0.7	1.22
SWGCP_only_5000/SWlin2006.15940.cnf	0.16	0.24	0.08	0.06	0.22	0.2	0.06	0.2	0.22	0.2	0.08	0.32	0.26	0.24	0.06	0.28	0.14	0.08	0.42	0.72
SWGCP_only_5000/SWlin2006.15941.cnf	0.22	0.42	0.1	0.1	0.38	0.42	0.14	0.32	0.38	0.4	0.12	0.64	0.52	0.46	0.1	0.52	0.28	0.12	0.74	1.88
SWGCP_only_5000/SWlin2006.15942.cnf	0.26	0.64	0.12	0.1	0.34	0.4	0.12	0.34	0.3	0.36	0.12	0.54	0.56	0.44	0.1	0.52	0.22	0.1	0.64	1.74
SWGCP_only_5000/SWlin2006.15943.cnf	0.24	0.4	0.06	0.1	0.36	0.4	0.12	0.34	0.4	0.44	0.12	0.68	0.16	0.5	0.08	0.44	0.28	0.1	1.14	1.62
SWGCP_only_5000/SWlin2006.15944.cnf	0.22	0.7	0.08	0.1	0.36	0.36	0.1	0.32	0.54	0.36	0.12	0.6	0.92	0.58	0.1	0.42	0.3	0.1	0.7	1.38
SWGCP_only_5000/SWlin2006.15945.cnf	0.3	0.48	0.1	0.1	0.44	0.4	0.12	0.38	0.1	0.48	0.12	0.68	1.04	0.48	0.1	0.48	0.18	0.08	0.6	1.72
SWGCP_only_5000/SWlin2006.15946.cnf	0.28	0.44	0.12	0.14	0.36	0.42	0.14	0.38	0.42	0.34	0.12	0.66	0.74	0.46	0.1	0.58	0.3	0.1	0.92	2.0
SWGCP_only_5000/SWlin2006.15947.cnf	0.04	0.02	0.06	0.08	0.0	0.04	0.04	0.04	0.02	0.04	0.06	0.02	0.06	0.02	0.06	0.04	0.0	0.06	0.04	0.58
SWGCP_only_5000/SWlin2006.15948.cnf	0.24	0.4	0.1	0.1	0.3	0.34	0.08	0.34	0.34	0.38	0.12	0.44	0.54	0.5	0.1	0.46	0.28	0.1	0.82	1.54
SWGCP_only_5000/SWlin2006.15949.cnf	0.22	0.12	0.1	0.1	0.34	0.4	0.12	0.32	0.46	0.42	0.12	0.48	0.16	0.32	0.12	0.5	0.28	0.12	0.72	1.54
SWGCP_only_5000/SWlin2006.15950.cnf	0.16	0.02	0.06	0.08	0.3	0.28	0.1	0.12	0.42	0.34	0.1	0.46	0.66	0.4	0.08	0.06	0.08	0.1	0.66	1.04
SWGCP_only_5000/SWlin2006.15951.cnf	0.24	0.84	0.08	0.08	0.36	0.26	0.1	0.32	0.06	0.42	0.12	0.68	0.7	0.58	0.1	0.48	0.28	0.12	0.76	1.54
SWGCP_only_5000/SWlin2006.15952.cnf	0.0	0.02	0.06	0.06	0.0	0.0	0.02	0.04	0.02	0.02	0.04	0.02	0.02	0.0	0.0	0.04	0.0	0.06	0.0	0.5
SWGCP_only_5000/SWlin2006.15953.cnf	0.28	0.66	0.08	0.12	0.4	0.3	0.14	0.38	0.62	0.18	0.12	0.48	0.82	0.46	0.1	0.54	0.38	0.18	1.04	1.82
SWGCP_only_5000/SWlin2006.15954.cnf	0.18	0.42	0.08	0.06	0.3	0.3	0.08	0.26	0.3	0.28	0.1	0.36	0.4	0.32	0.08	0.34	0.2	0.08	0.56	0.98
SWGCP_only_5000/SWlin2006.15955.cnf	0.26	0.8	0.1	0.1	0.42	0.34	0.12	0.42	0.56	0.5	0.12	0.76	0.68	0.58	0.1	0.64	0.34	0.12	0.94	1.68
SWGCP_only_5000/SWlin2006.15956.cnf	0.22	0.26	0.12	0.12	0.38	0.38	0.14	0.34	0.34	0.32	0.12	0.64	0.34	0.32	0.1	0.5	0.16	0.12	0.72	1.74
SWGCP_only_5000/SWlin2006.15957.cnf	0.02	0.0	0.06	0.06	0.0	0.16	0.04	0.04	0.0	0.02	0.06	0.02	0.0	0.0	0.02	0.24	0.02	0.08	0.32	0.48
SWGCP_only_5000/SWlin2006.15958.cnf	0.24	0.68	0.08	0.1	0.38	0.34	0.12	0.3	0.52	0.4	0.12	0.64	0.48	0.54	0.08	0.32	0.28	0.1	0.64	1.48
SWGCP_only_5000/SWlin2006.15959.cnf	0.24	0.14	0.08	0.06	0.06	0.34	0.1	0.1	0.38	0.2	0.12	0.52	0.5	0.6	0.08	0.46	0.16	0.1	0.7	1.26
SWGCP_only_5000/SWlin2006.15960.cnf	0.22	0.44	0.1	0.1	0.36	0.34	0.12	0.34	0.3	0.42	0.14	0.54	0.42	0.48	0.1	0.46	0.26	0.12	0.7	1.66
SWGCP_only_5000/SWlin2006.15961.cnf	0.06	0.02	0.06	0.06	0.22	0.2	0.08	0.08	0.14	0.24	0.08	0.32	0.02	0.28	0.08	0.0	0.04	0.08	0.46	0.64
SWGCP_only_5000/SWlin2006.15962.cnf	0.14	0.2	0.04	0.06	0.2	0.26	0.06	0.22	0.2	0.24	0.1	0.36	0.24	0.18	0.06	0.3	0.12	0.08	0.52	0.8
SWGCP_only_5000/SWlin2006.15963.cnf	0.14	0.06	0.08	0.08	0.28	0.3	0.1	0.28	0.1	0.32	0.1	0.5	0.2	0.36	0.06	0.4	0.26	0.1	0.52	1.1
SWGCP_only_5000/SWlin2006.15964.cnf	0.12	0.06	0.06	0.08	0.28	0.08	0.08	0.26	0.22	0.06	0.1	0.06	0.4	0.38	0.08	0.28	0.12	0.1	0.14	0.96
SWGCP_only_5000/SWlin2006.15965.cnf	0.2	0.6	0.06	0.06	0.34	0.32	0.1	0.26	0.28	0.36	0.08	0.44	0.5	0.36	0.08	0.34	0.22	0.1	0.56	1.12
SWGCP_only_5000/SWlin2006.15966.cnf	0.14	0.44	0.04	0.08	0.24	0.22	0.08	0.2	0.3	0.24	0.08	0.36	0.5	0.38	0.06	0.28	0.16	0.06	0.5	0.68
SWGCP_only_5000/SWlin2006.15967.cnf	0.14	0.28	0.06	0.08	0.24	0.26	0.08	0.2	0.24	0.26	0.08	0.34	0.34	0.26	0.08	0.3	0.18	0.1	0.56	0.82
SWGCP_only_5000/SWlin2006.15968.cnf	0.18	0.46	0.06	0.08	0.28	0.26	0.08	0.24	0.36	0.28	0.08	0.44	0.64	0.4	0.06	0.28	0.2	0.06	0.6	0.86
SWGCP_only_5000/SWlin2006.15969.cnf	0.24	0.3	0.08	0.1	0.42	0.34	0.12	0.34	0.36	0.34	0.12	0.48	0.38	0.3	0.1	0.5	0.22	0.1	0.92	1.86
SWGCP_only_5000/SWlin2006.15970.cnf	0.16	0.34	0.04	0.06	0.22	0.22	0.08	0.18	0.26	0.24	0.06	0.3	0.42	0.3	0.06	0.26	0.18	0.08	0.46	0.68
SWGCP_only_5000/SWlin2006.15971.cnf	0.24	0.6	0.1	0.1	0.42	0.36	0.12	0.36	0.48	0.4	0.12	0.56	0.66	0.5	0.1	0.52	0.3	0.12	0.74	1.66
SWGCP_only_5000/SWlin2006.15972.cnf	0.14	0.54	0.06	0.06	0.1	0.26	0.08	0.24	0.06	0.26	0.08	0.46	0.08	0.34	0.08	0.38	0.22	0.08	0.6	0.92
SWGCP_only_5000/SWlin2006.15973.cnf	0.12	0.4	0.06	0.08	0.08	0.24	0.08	0.04	0.12	0.08	0.08	0.42	0.64	0.3	0.08	0.34	0.2	0.08	0.08	0.84
SWGCP_only_5000/SWlin2006.15974.cnf	0.24	0.5	0.08	0.08	0.3	0.3	0.1	0.32	0.42	0.36	0.12	0.54	0.58	0.58	0.08	0.42	0.26	0.1	0.74	1.28
SWGCP_only_5000/SWlin2006.15975.cnf	0.14	0.1	0.08	0.06	0.28	0.28	0.08	0.06	0.22	0.18	0.1	0.36	0.08	0.4	0.06	0.24	0.18	0.08	0.46	0.96
SWGCP_only_5000/SWlin2006.15976.cnf	0.3	0.46	0.1	0.12	0.46	0.38	0.12	0.4	0.3	0.42	0.12	0.62	0.66	0.5	0.12	0.62	0.34	0.12	1.02	1.98
SWGCP_only_5000/SWlin2006.15977.cnf	0.2	0.02	0.08	0.1	0.3	0.28	0.08	0.24	0.12	0.3	0.1	0.56	0.36	0.34	0.1	0.24	0.2	0.08	0.52	1.1
SWGCP_only_5000/SWlin2006.15978.cnf	0.22	0.5	0.1	0.08	0.3	0.32	0.1	0.3	0.34	0.34	0.1	0.48	0.64	0.38	0.06	0.36	0.24	0.1	0.74	1.24
SWGCP_only_5000/SWlin2006.15979.cnf	0.18	0.46	0.1	0.1	0.44	0.4	0.1	0.4	0.5	0.34	0.12	0.34	0.6	0.62	0.1	0.32	0.3	0.1	1.02	1.66
SWGCP_only_5000/SWlin2006.15980.cnf	0.18	0.24	0.08	0.08	0.38	0.32	0.1	0.32	0.44	0.06	0.12	0.1	0.58	0.42	0.1	0.44	0.1	0.1	0.72	1.3
SWGCP_only_5000/SWlin2006.15981.cnf	0.24	0.56	0.1	0.1	0.22	0.36	0.12	0.32	0.08	0.4	0.1	0.62	1.12	0.6	0.1	0.5	0.26	0.1	0.24	1.64
SWGCP_only_5000/SWlin2006.15982.cnf	0.28	0.18	0.1	0.1	0.46	0.36	0.14	0.46	0.48	0.4	0.14	0.72	0.6	0.48	0.12	0.56	0.34	0.12	0.74	1.86
SWGCP_only_5000/SWlin2006.15983.cnf	0.26	0.4	0.1	0.12	0.38	0.4	0.14	0.32	0.44	0.38	0.14	0.48	0.56	0.36	0.12	0.5	0.22	0.1	0.58	1.82
SWGCP_only_5000/SWlin2006.15984.cnf	0.14	0.34	0.06	0.08	0.22	0.22	0.08	0.2	0.28	0.24	0.1	0.34	0.4	0.32	0.08	0.32	0.18	0.1	0.46	0.74
SWGCP_only_5000/SWlin2006.15985.cnf	0.2	0.04	0.08	0.08	0.28	0.26	0.1	0.06	0.02	0.3	0.1	0.46	0.66	0.32	0.08	0.16	0.22	0.1	0.64	1.08
SWGCP_only_5000/SWlin2006.15986.cnf	0.24	0.56	0.08	0.08	0.42	0.32	0.12	0.38	0.44	0.38	0.14	0.58	0.64	0.52	0.08	0.44	0.24	0.1	0.66	1.6
SWGCP_only_5000/SWlin2006.15987.cnf	0.2	0.34	0.06	0.08	0.28	0.3	0.1	0.26	0.28	0.3	0.1	0.38	0.34	0.26	0.08	0.4	0.18	0.1	0.6	1.26
SWGCP_only_5000/SWlin2006.15988.cnf	0.28	0.7	0.12	0.12	0.44	0.34	0.1	0.4	0.48	0.44	0.14	0.7	1.06	0.62	0.1	0.52	0.28	0.1	1.14	1.84
SWGCP_only_5000/SWlin2006.15989.cnf	0.24	0.32	0.08	0.08	0.34	0.34	0.14	0.3	0.48	0.32	0.12	0.52	0.76	0.44	0.06	0.5	0.24	0.1	0.38	1.46
SWGCP_only_5000/SWlin2006.15990.cnf	0.04	0.36	0.06	0.06	0.02	0.02	0.08	0.02	0.02	0.06	0.08	0.0	0.06	0.02	0.06	0.24	0.04	0.08	0.42	0.56
SWGCP_only_5000/SWlin2006.15991.cnf	0.26	0.24	0.1	0.12	0.38	0.24	0.12	0.38	0.08	0.38	0.1	0.62	0.94	0.66	0.1	0.62	0.34	0.1	0.94	1.76
SWGCP_only_5000/SWlin2006.15992.cnf	0.16	0.26	0.06	0.08	0.22	0.24	0.08	0.2	0.26	0.24	0.1	0.4	0.36	0.32	0.08	0.3	0.16	0.08	0.44	0.88
SWGCP_only_5000/SWlin2006.15993.cnf	0.12	0.36	0.06	0.06	0.24	0.22	0.06	0.22	0.3	0.26	0.06	0.38	0.48	0.36	0.08	0.3	0.18	0.08	0.54	0.7
SWGCP_only_5000/SWlin2006.15994.cnf	0.22	0.6	0.08	0.08	0.32	0.38	0.1	0.28	0.12	0.3	0.12	0.5	0.76	0.08	0.08	0.44	0.24	0.12	0.66	1.36
SWGCP_only_5000/SWlin2006.15995.cnf	0.26	0.1	0.08	0.1	0.38	0.38	0.1	0.26	0.54	0.42	0.12	0.48	0.68	0.62	0.1	0.26	0.3	0.12	0.76	1.42
SWGCP_only_5000/SWlin2006.15996.cnf	0.22	0.74	0.1	0.12	0.24	0.32	0.1	0.34	0.36	0.36	0.12	0.54	0.7	0.08	0.1	0.56	0.32	0.12	0.86	1.6
SWGCP_only_5000/SWlin2006.15997.cnf	0.26	0.66	0.1	0.12	0.38	0.38	0.1	0.32	0.36	0.4	0.14	0.44	0.72	0.52	0.12	0.42	0.24	0.1	0.82	1.64
SWGCP_only_5000/SWlin2006.15998.cnf	0.26	0.74	0.1	0.1	0.4	0.1	0.12	0.38	0.4	0.46	0.14	0.78	0.68	0.64	0.12	0.56	0.32	0.12	1.02	1.76
SWGCP_only_5000/SWlin2006.15999.cnf	0.26	0.52	0.08	0.08	0.32	0.36	0.1	0.32	0.32	0.34	0.12	0.66	0.64	0.56	0.08	0.42	0.26	0.1	0.9	1.36
SWGCP_only_5000/SWlin2006.16000.cnf	0.12	0.1	0.08	0.08	0.18	0.34	0.1	0.18	0.12	0.08	0.14	0.62	0.82	0.3	0.1	0.42	0.3	0.1	0.54	1.34
SWGCP_only_5000/SWlin2006.16001.cnf	0.3	0.44	0.1	0.1	0.28	0.46	0.12	0.4	0.08	0.5	0.12	0.58	0.68	0.6	0.1	0.56	0.22	0.12	0.76	1.74
SWGCP_only_5000/SWlin2006.16002.cnf	0.32	0.66	0.1	0.12	0.42	0.54	0.12	0.44	0.54	0.44	0.12	0.86	0.58	0.56	0.14	0.66	0.34	0.14	0.78	1.98
SWGCP_only_5000/SWlin2006.16003.cnf	0.2	0.6	0.08	0.1	0.34	0.3	0.1	0.28	0.42	0.32	0.12	0.5	0.66	0.52	0.1	0.4	0.26	0.1	0.7	1.12
SWGCP_only_5000/SWlin2006.16004.cnf	0.24	0.42	0.1	0.1	0.3	0.36	0.08	0.3	0.4	0.32	0.12	0.44	0.56	0.42	0.1	0.44	0.28	0.12	0.74	1.34
SWGCP_only_5000/SWlin2006.16005.cnf	0.2	0.26	0.12	0.12	0.42	0.34	0.12	0.36	0.26	0.38	0.1	0.42	0.34	0.3	0.1	0.42	0.22	0.12	0.64	1.8
SWGCP_only_5000/SWlin2006.16006.cnf	0.2	0.46	0.06	0.08	0.34	0.18	0.12	0.24	0.48	0.04	0.12	0.1	0.24	0.04	0.1	0.4	0.26	0.1	0.76	1.2
SWGCP_only_5000/SWlin2006.16007.cnf	0.28	0.66	0.08	0.12	0.46	0.44	0.1	0.36	0.4	0.52	0.12	0.6	0.64	0.64	0.1	0.46	0.28	0.14	0.66	1.94
SWGCP_only_5000/SWlin2006.16008.cnf	0.24	0.12	0.08	0.1	0.44	0.34	0.12	0.34	0.38	0.38	0.12	0.66	0.54	0.52	0.12	0.44	0.28	0.12	0.78	1.52
SWGCP_only_5000/SWlin2006.16009.cnf	0.16	0.42	0.04	0.08	0.22	0.26	0.06	0.22	0.32	0.28	0.1	0.42	0.6	0.36	0.06	0.3	0.22	0.08	0.46	0.86
SWGCP_only_5000/SWlin2006.16010.cnf	0.3	0.8	0.1	0.14	0.48	0.42	0.12	0.38	0.58	0.52	0.14	0.7	0.68	0.16	0.12	0.58	0.3	0.12	0.88	1.86
SWGCP_only_5000/SWlin2006.16011.cnf	0.24	0.18	0.08	0.08	0.08	0.36	0.1	0.32	0.46	0.3	0.1	0.48	0.84	0.4	0.08	0.52	0.24	0.1	0.44	1.4
SWGCP_only_5000/SWlin2006.16012.cnf	0.12	0.3	0.04	0.06	0.16	0.14	0.06	0.16	0.22	0.18	0.06	0.24	0.36	0.24	0.06	0.2	0.14	0.06	0.34	0.42
SWGCP_only_5000/SWlin2006.16013.cnf	0.14	0.16	0.08	0.06	0.24	0.24	0.08	0.2	0.16	0.24	0.1	0.3	0.2	0.18	0.06	0.26	0.14	0.08	0.4	0.78
SWGCP_only_5000/SWlin2006.16014.cnf	0.24	0.6	0.08	0.08	0.34	0.28	0.14	0.34	0.5	0.4	0.12	0.54	0.6	0.58	0.1	0.56	0.28	0.1	0.86	1.4
SWGCP_only_5000/SWlin2006.16015.cnf	0.0	0.0	0.04	0.06	0.0	0.02	0.06	0.02	0.0	0.0	0.06	0.0	0.0	0.0	0.06	0.0	0.02	0.06	0.04	0.42
SWGCP_only_5000/SWlin2006.16016.cnf	0.24	0.24	0.1	0.1	0.3	0.4	0.12	0.38	0.08	0.44	0.12	0.48	0.56	0.64	0.1	0.44	0.1	0.1	0.9	1.62
SWGCP_only_5000/SWlin2006.16017.cnf	0.26	0.8	0.12	0.1	0.34	0.46	0.12	0.26	0.4	0.4	0.12	0.48	0.22	0.58	0.1	0.6	0.26	0.1	0.82	1.86
SWGCP_only_5000/SWlin2006.16018.cnf	0.14	0.02	0.04	0.06	0.06	0.04	0.06	0.2	0.24	0.02	0.06	0.08	0.44	0.02	0.06	0.24	0.16	0.06	0.42	0.56
SWGCP_only_5000/SWlin2006.16019.cnf	0.24	0.08	0.08	0.1	0.2	0.32	0.12	0.34	0.5	0.38	0.1	0.64	0.66	0.32	0.08	0.16	0.32	0.12	0.86	1.56
SWGCP_only_5000/SWlin2006.16020.cnf	0.22	0.32	0.08	0.08	0.36	0.36	0.12	0.36	0.32	0.4	0.12	0.58	0.8	0.42	0.1	0.18	0.08	0.1	0.68	1.4
SWGCP_only_5000/SWlin2006.16021.cnf	0.22	0.72	0.08	0.1	0.36	0.38	0.12	0.34	0.64	0.4	0.12	0.38	0.72	0.48	0.08	0.54	0.24	0.12	0.98	1.48
SWGCP_only_5000/SWlin2006.16022.cnf	0.28	0.58	0.1	0.1	0.4	0.36	0.1	0.36	0.48	0.48	0.14	0.6	0.62	0.66	0.1	0.52	0.26	0.12	0.88	1.72
SWGCP_only_5000/SWlin2006.16023.cnf	0.24	0.28	0.08	0.1	0.22	0.34	0.14	0.4	0.12	0.46	0.12	0.54	0.84	0.48	0.12	0.28	0.32	0.1	1.12	1.6
SWGCP_only_5000/SWlin2006.16024.cnf	0.04	0.0	0.06	0.04	0.02	0.18	0.02	0.02	0.24	0.06	0.08	0.12	0.0	0.0	0.06	0.02	0.1	0.08	0.42	0.56
SWGCP_only_5000/SWlin2006.16025.cnf	0.22	0.52	0.08	0.06	0.3	0.04	0.08	0.28	0.14	0.34	0.1	0.1	0.8	0.52	0.08	0.48	0.24	0.1	0.72	1.12
SWGCP_only_5000/SWlin2006.16026.cnf	0.22	0.52	0.08	0.1	0.38	0.32	0.1	0.34	0.56	0.38	0.12	0.4	0.86	0.62	0.1	0.56	0.3	0.12	0.86	1.56
SWGCP_only_5000/SWlin2006.16027.cnf	0.2	0.6	0.06	0.08	0.32	0.32	0.1	0.3	0.34	0.32	0.12	0.44	0.72	0.4	0.08	0.36	0.2	0.1	0.68	1.16
SWGCP_only_5000/SWlin2006.16028.cnf	0.12	0.34	0.06	0.06	0.22	0.18	0.06	0.16	0.24	0.2	0.08	0.3	0.42	0.28	0.06	0.26	0.14	0.08	0.42	0.58
SWGCP_only_5000/SWlin2006.16029.cnf	0.12	0.38	0.08	0.06	0.34	0.28	0.1	0.28	0.42	0.3	0.1	0.48	0.78	0.26	0.1	0.4	0.2	0.1	0.72	1.12
SWGCP_only_5000/SWlin2006.16030.cnf	0.18	0.42	0.1	0.08	0.28	0.34	0.1	0.28	0.46	0.32	0.12	0.46	0.72	0.46	0.1	0.36	0.22	0.08	0.7	1.3
SWGCP_only_5000/SWlin2006.16031.cnf	0.2	0.52	0.08	0.08	0.32	0.28	0.1	0.24	0.4	0.26	0.1	0.38	0.7	0.46	0.08	0.4	0.24	0.08	0.52	0.96
SWGCP_only_5000/SWlin2006.16032.cnf	0.22	0.66	0.08	0.1	0.38	0.3	0.1	0.32	0.46	0.34	0.12	0.48	0.5	0.36	0.1	0.4	0.28	0.1	0.16	1.24
SWGCP_only_5000/SWlin2006.16033.cnf	0.2	0.34	0.08	0.08	0.26	0.26	0.1	0.24	0.34	0.26	0.08	0.42	0.52	0.36	0.06	0.28	0.2	0.08	0.64	0.98
SWGCP_only_5000/SWlin2006.16034.cnf	0.24	0.7	0.1	0.1	0.48	0.4	0.12	0.32	0.64	0.14	0.14	0.54	0.26	0.16	0.1	0.64	0.3	0.14	0.98	1.82
SWGCP_only_5000/SWlin2006.16035.cnf	0.18	0.5	0.08	0.08	0.26	0.28	0.1	0.24	0.36	0.32	0.1	0.48	0.58	0.32	0.08	0.36	0.24	0.08	0.58	0.92
SWGCP_only_5000/SWlin2006.16036.cnf	0.24	0.64	0.08	0.08	0.18	0.34	0.1	0.32	0.28	0.38	0.12	0.56	0.18	0.14	0.08	0.44	0.1	0.12	0.74	1.28
SWGCP_only_5000/SWlin2006.16037.cnf	0.0	0.0	0.02	0.06	0.02	0.0	0.06	0.16	0.0	0.16	0.06	0.0	0.02	0.12	0.02	0.0	0.0	0.06	0.0	0.44
SWGCP_only_5000/SWlin2006.16038.cnf	0.04	0.02	0.04	0.06	0.0	0.06	0.06	0.06	0.26	0.02	0.04	0.0	0.0	0.0	0.06	0.02	0.12	0.08	0.16	0.54
SWGCP_only_5000/SWlin2006.16039.cnf	0.22	0.44	0.08	0.08	0.38	0.32	0.1	0.34	0.4	0.36	0.1	0.56	0.68	0.12	0.1	0.38	0.26	0.1	0.14	1.38
SWGCP_only_5000/SWlin2006.16040.cnf	0.24	0.56	0.08	0.06	0.3	0.3	0.1	0.28	0.48	0.32	0.1	0.54	0.6	0.42	0.08	0.36	0.28	0.1	0.82	1.2
SWGCP_only_5000/SWlin2006.16041.cnf	0.18	0.32	0.08	0.1	0.52	0.32	0.12	0.4	0.46	0.48	0.14	0.82	1.04	0.66	0.1	0.54	0.4	0.1	1.2	1.88
SWGCP_only_5000/SWlin2006.16042.cnf	0.3	0.12	0.12	0.12	0.18	0.4	0.14	0.44	0.44	0.42	0.14	0.62	0.76	0.44	0.1	0.58	0.36	0.12	0.76	1.96
SWGCP_only_5000/SWlin2006.16043.cnf	0.18	0.4	0.08	0.08	0.32	0.32	0.08	0.26	0.4	0.36	0.08	0.46	0.74	0.4	0.06	0.38	0.22	0.08	0.76	1.12
SWGCP_only_5000/SWlin2006.16044.cnf	0.28	0.8	0.1	0.1	0.42	0.4	0.12	0.34	0.46	0.3	0.12	0.6	1.04	0.66	0.12	0.54	0.32	0.12	0.86	1.94
SWGCP_only_5000/SWlin2006.16045.cnf	0.16	0.4	0.06	0.08	0.22	0.24	0.08	0.24	0.24	0.22	0.1	0.38	0.56	0.34	0.06	0.32	0.18	0.08	0.56	0.78
SWGCP_only_5000/SWlin2006.16046.cnf	0.28	0.54	0.12	0.12	0.4	0.42	0.12	0.46	0.42	0.36	0.14	0.72	0.96	0.58	0.12	0.46	0.14	0.12	0.8	1.92
SWGCP_only_5000/SWlin2006.16047.cnf	0.18	0.56	0.08	0.1	0.4	0.4	0.1	0.32	0.48	0.4	0.1	0.14	0.58	0.56	0.06	0.38	0.24	0.08	0.7	1.34
SWGCP_only_5000/SWlin2006.16048.cnf	0.24	0.42	0.08	0.08	0.4	0.32	0.12	0.28	0.36	0.4	0.08	0.42	0.64	0.54	0.1	0.38	0.24	0.1	0.7	1.3
SWGCP_only_5000/SWlin2006.16049.cnf	0.1	0.34	0.06	0.06	0.18	0.16	0.06	0.16	0.26	0.2	0.06	0.28	0.4	0.26	0.06	0.2	0.14	0.06	0.38	0.5
SWGCP_only_5000/SWlin2006.16050.cnf	0.24	0.36	0.1	0.12	0.38	0.4	0.12	0.36	0.42	0.38	0.12	0.6	0.44	0.4	0.12	0.46	0.24	0.08	0.9	1.76
SWGCP_only_5000/SWlin2006.16051.cnf	0.22	0.64	0.1	0.1	0.4	0.36	0.08	0.36	0.5	0.36	0.12	0.44	0.92	0.4	0.12	0.48	0.28	0.12	0.74	1.66
SWGCP_only_5000/SWlin2006.16052.cnf	0.24	0.58	0.08	0.14	0.5	0.44	0.14	0.42	0.64	0.4	0.14	0.54	0.54	0.62	0.12	0.42	0.24	0.14	0.86	1.94
SWGCP_only_5000/SWlin2006.16053.cnf	0.18	0.4	0.08	0.06	0.3	0.3	0.1	0.3	0.38	0.36	0.08	0.52	0.56	0.32	0.08	0.38	0.16	0.08	0.56	1.02
SWGCP_only_5000/SWlin2006.16054.cnf	0.18	0.38	0.08	0.06	0.26	0.26	0.08	0.26	0.28	0.32	0.1	0.44	0.46	0.3	0.08	0.32	0.22	0.1	0.7	1.18
SWGCP_only_5000/SWlin2006.16055.cnf	0.18	0.6	0.06	0.08	0.34	0.08	0.08	0.26	0.44	0.34	0.1	0.5	0.66	0.34	0.08	0.46	0.22	0.1	0.76	1.0
SWGCP_only_5000/SWlin2006.16056.cnf	0.06	0.1	0.06	0.06	0.04	0.22	0.08	0.22	0.0	0.16	0.08	0.34	0.12	0.02	0.06	0.34	0.04	0.06	0.04	0.76
SWGCP_only_5000/SWlin2006.16057.cnf	0.12	0.46	0.06	0.06	0.24	0.24	0.08	0.22	0.28	0.22	0.08	0.34	0.44	0.34	0.06	0.3	0.18	0.08	0.46	0.7
SWGCP_only_5000/SWlin2006.16058.cnf	0.3	0.64	0.12	0.12	0.4	0.44	0.14	0.4	0.44	0.48	0.14	0.46	0.72	0.5	0.12	0.64	0.34	0.12	0.9	1.94
SWGCP_only_5000/SWlin2006.16059.cnf	0.12	0.24	0.06	0.06	0.18	0.18	0.06	0.14	0.22	0.2	0.06	0.28	0.32	0.24	0.06	0.2	0.14	0.06	0.38	0.52
SWGCP_only_5000/SWlin2006.16060.cnf	0.22	0.5	0.08	0.1	0.36	0.34	0.1	0.32	0.44	0.4	0.12	0.5	0.7	0.48	0.1	0.42	0.26	0.1	0.66	1.54
SWGCP_only_5000/SWlin2006.16061.cnf	0.06	0.0	0.06	0.04	0.0	0.02	0.02	0.0	0.0	0.02	0.06	0.0	0.0	0.0	0.02	0.0	0.0	0.06	0.0	0.44
SWGCP_only_5000/SWlin2006.16062.cnf	0.22	0.72	0.1	0.12	0.5	0.44	0.12	0.34	0.4	0.36	0.12	0.6	0.56	0.34	0.1	0.58	0.26	0.1	1.04	1.58
SWGCP_only_5000/SWlin2006.16063.cnf	0.22	0.62	0.1	0.08	0.36	0.46	0.14	0.38	0.58	0.36	0.14	0.66	0.64	0.52	0.08	0.52	0.24	0.12	0.64	1.8
SWGCP_only_5000/SWlin2006.16064.cnf	0.26	0.52	0.1	0.08	0.34	0.34	0.1	0.16	0.54	0.44	0.12	0.6	0.78	0.5	0.08	0.48	0.22	0.12	0.38	1.46
SWGCP_only_5000/SWlin2006.16065.cnf	0.24	0.36	0.1	0.08	0.4	0.34	0.1	0.34	0.12	0.36	0.12	0.46	0.34	0.06	0.1	0.56	0.3	0.1	0.68	1.68
SWGCP_only_5000/SWlin2006.16066.cnf	0.28	0.58	0.1	0.12	0.52	0.5	0.12	0.44	0.58	0.5	0.12	0.18	0.54	0.68	0.1	0.56	0.28	0.12	1.1	1.98
SWGCP_only_5000/SWlin2006.16067.cnf	0.24	0.68	0.1	0.08	0.4	0.4	0.1	0.42	0.08	0.24	0.14	0.26	0.84	0.66	0.1	0.48	0.3	0.1	1.1	1.6
SWGCP_only_5000/SWlin2006.16068.cnf	0.22	0.34	0.1	0.1	0.38	0.36	0.12	0.3	0.4	0.42	0.14	0.68	0.5	0.38	0.1	0.38	0.26	0.12	0.66	1.54
SWGCP_only_5000/SWlin2006.16069.cnf	0.2	0.62	0.08	0.08	0.32	0.34	0.1	0.28	0.36	0.32	0.1	0.48	0.76	0.5	0.1	0.4	0.24	0.12	0.58	1.18
SWGCP_only_5000/SWlin2006.16070.cnf	0.24	0.5	0.08	0.12	0.42	0.42	0.12	0.32	0.48	0.4	0.12	0.56	0.68	0.5	0.12	0.56	0.32	0.12	0.56	1.86
SWGCP_only_5000/SWlin2006.16071.cnf	0.24	0.74	0.1	0.12	0.46	0.44	0.14	0.44	0.68	0.5	0.14	0.86	0.92	0.7	0.12	0.66	0.36	0.12	1.2	1.98
SWGCP_only_5000/SWlin2006.16072.cnf	0.2	0.62	0.06	0.06	0.26	0.1	0.08	0.26	0.4	0.32	0.1	0.18	0.62	0.12	0.08	0.4	0.22	0.08	0.68	0.98
SWGCP_only_5000/SWlin2006.16073.cnf	0.22	0.24	0.1	0.12	0.4	0.32	0.1	0.36	0.3	0.34	0.12	0.5	0.36	0.3	0.12	0.4	0.24	0.12	0.72	1.78
SWGCP_only_5000/SWlin2006.16074.cnf	0.18	0.66	0.06	0.08	0.32	0.28	0.1	0.12	0.44	0.38	0.1	0.52	0.72	0.52	0.1	0.44	0.24	0.1	0.56	1.12
SWGCP_only_5000/SWlin2006.16075.cnf	0.16	0.22	0.06	0.06	0.2	0.2	0.08	0.16	0.2	0.18	0.08	0.32	0.26	0.22	0.06	0.26	0.12	0.06	0.38	0.62
SWGCP_only_5000/SWlin2006.16076.cnf	0.18	0.12	0.08	0.08	0.28	0.26	0.12	0.26	0.44	0.36	0.08	0.4	0.64	0.5	0.06	0.44	0.22	0.12	0.7	1.12
SWGCP_only_5000/SWlin2006.16077.cnf	0.2	0.68	0.08	0.1	0.36	0.3	0.12	0.32	0.32	0.3	0.1	0.5	0.74	0.44	0.08	0.44	0.2	0.1	0.62	1.2
SWGCP_only_5000/SWlin2006.16078.cnf	0.18	0.22	0.08	0.1	0.3	0.32	0.08	0.22	0.28	0.28	0.08	0.48	0.24	0.24	0.08	0.36	0.16	0.1	0.44	1.04
SWGCP_only_5000/SWlin2006.16079.cnf	0.22	0.66	0.08	0.1	0.38	0.42	0.12	0.38	0.6	0.06	0.14	0.7	1.14	0.22	0.1	0.48	0.14	0.1	0.7	1.64
SWGCP_only_5000/SWlin2006.16080.cnf	0.04	0.38	0.06	0.06	0.24	0.2	0.06	0.2	0.0	0.22	0.08	0.12	0.04	0.34	0.08	0.28	0.16	0.08	0.44	0.64
SWGCP_only_5000/SWlin2006.16081.cnf	0.14	0.06	0.06	0.06	0.24	0.2	0.08	0.2	0.22	0.18	0.04	0.02	0.52	0.3	0.06	0.3	0.02	0.08	0.48	0.7
SWGCP_only_5000/SWlin2006.16082.cnf	0.12	0.34	0.06	0.06	0.18	0.16	0.06	0.14	0.24	0.16	0.06	0.28	0.36	0.22	0.06	0.22	0.16	0.06	0.4	0.48
SWGCP_only_5000/SWlin2006.16083.cnf	0.22	0.48	0.08	0.06	0.36	0.36	0.1	0.26	0.5	0.38	0.1	0.44	0.64	0.42	0.1	0.48	0.24	0.1	0.9	1.22
SWGCP_only_5000/SWlin2006.16084.cnf	0.3	0.46	0.1	0.12	0.16	0.38	0.12	0.38	0.34	0.48	0.14	0.52	0.9	0.66	0.12	0.48	0.3	0.1	0.84	1.7
SWGCP_only_5000/SWlin2006.16085.cnf	0.26	0.42	0.1	0.1	0.4	0.36	0.12	0.38	0.54	0.46	0.12	0.44	1.18	0.46	0.12	0.48	0.34	0.12	0.84	1.7
SWGCP_only_5000/SWlin2006.16086.cnf	0.26	0.42	0.08	0.08	0.4	0.36	0.12	0.4	0.46	0.38	0.12	0.68	1.0	0.64	0.1	0.08	0.3	0.1	0.9	1.58
SWGCP_only_5000/SWlin2006.16087.cnf	0.22	0.7	0.1	0.1	0.34	0.3	0.12	0.3	0.4	0.14	0.1	0.6	0.18	0.52	0.1	0.4	0.22	0.1	0.76	1.32
SWGCP_only_5000/SWlin2006.16088.cnf	0.22	0.78	0.1	0.1	0.44	0.42	0.12	0.38	0.48	0.36	0.12	0.58	0.66	0.5	0.1	0.56	0.28	0.12	0.74	1.62
SWGCP_only_5000/SWlin2006.16089.cnf	0.2	0.52	0.08	0.06	0.08	0.08	0.06	0.26	0.36	0.16	0.1	0.42	0.08	0.38	0.08	0.06	0.08	0.06	0.48	0.9
SWGCP_only_5000/SWlin2006.16090.cnf	0.24	0.7	0.08	0.1	0.38	0.32	0.12	0.32	0.44	0.1	0.1	0.6	0.64	0.44	0.1	0.38	0.24	0.08	0.86	1.42
SWGCP_only_5000/SWlin2006.16091.cnf	0.14	0.26	0.06	0.08	0.2	0.22	0.08	0.18	0.22	0.2	0.06	0.3	0.38	0.26	0.04	0.26	0.16	0.08	0.42	0.66
SWGCP_only_5000/SWlin2006.16092.cnf	0.18	0.48	0.08	0.08	0.32	0.28	0.08	0.26	0.36	0.3	0.1	0.42	0.44	0.32	0.08	0.42	0.22	0.08	0.58	1.08
SWGCP_only_5000/SWlin2006.16093.cnf	0.14	0.42	0.04	0.06	0.22	0.22	0.06	0.18	0.28	0.24	0.08	0.36	0.48	0.32	0.06	0.26	0.18	0.08	0.48	0.64
SWGCP_only_5000/SWlin2006.16094.cnf	0.22	0.06	0.1	0.1	0.08	0.34	0.1	0.34	0.4	0.38	0.1	0.56	0.12	0.56	0.08	0.48	0.18	0.1	0.24	1.38
SWGCP_only_5000/SWlin2006.16095.cnf	0.22	0.3	0.1	0.1	0.36	0.28	0.12	0.36	0.36	0.34	0.12	0.52	0.36	0.3	0.1	0.48	0.24	0.12	0.82	1.56
SWGCP_only_5000/SWlin2006.16096.cnf	0.24	0.5	0.1	0.1	0.36	0.44	0.1	0.3	0.36	0.34	0.14	0.44	0.56	0.44	0.08	0.46	0.22	0.12	0.84	1.58
SWGCP_only_5000/SWlin2006.16097.cnf	0.16	0.36	0.08	0.06	0.24	0.24	0.08	0.2	0.3	0.24	0.08	0.38	0.44	0.3	0.08	0.3	0.2	0.08	0.5	0.84
SWGCP_only_5000/SWlin2006.16098.cnf	0.14	0.52	0.08	0.08	0.32	0.1	0.12	0.3	0.48	0.42	0.12	0.66	0.24	0.36	0.08	0.14	0.04	0.08	0.86	1.34
SWGCP_only_5000/SWlin2006.16099.cnf	0.22	0.38	0.1	0.12	0.36	0.4	0.14	0.36	0.36	0.32	0.14	0.52	0.42	0.46	0.08	0.5	0.26	0.12	0.8	1.82
SWGCP_only_5000/SWlin2006.16100.cnf	0.16	0.3	0.04	0.06	0.18	0.2	0.08	0.18	0.28	0.24	0.08	0.32	0.44	0.34	0.08	0.3	0.16	0.08	0.5	0.68
SWGCP_only_5000/SWlin2006.16101.cnf	0.12	0.2	0.08	0.06	0.16	0.16	0.08	0.18	0.18	0.16	0.08	0.28	0.28	0.22	0.06	0.2	0.14	0.06	0.36	0.6
SWGCP_only_5000/SWlin2006.16102.cnf	0.22	0.56	0.12	0.12	0.48	0.4	0.12	0.34	0.32	0.26	0.12	0.3	0.3	0.74	0.1	0.58	0.12	0.1	0.98	1.92
SWGCP_only_5000/SWlin2006.16103.cnf	0.16	0.44	0.06	0.06	0.24	0.22	0.08	0.2	0.32	0.24	0.1	0.36	0.48	0.34	0.08	0.28	0.18	0.08	0.44	0.7
SWGCP_only_5000/SWlin2006.16104.cnf	0.22	0.58	0.06	0.1	0.32	0.36	0.1	0.08	0.46	0.34	0.12	0.48	0.42	0.2	0.1	0.5	0.22	0.1	0.54	1.36
SWGCP_only_5000/SWlin2006.16105.cnf	0.12	0.32	0.06	0.06	0.24	0.06	0.06	0.04	0.18	0.02	0.06	0.32	0.02	0.28	0.06	0.28	0.16	0.06	0.42	0.64
SWGCP_only_5000/SWlin2006.16106.cnf	0.26	0.84	0.1	0.12	0.44	0.42	0.1	0.32	0.34	0.52	0.12	0.54	0.66	0.4	0.12	0.56	0.22	0.1	0.74	1.76
SWGCP_only_5000/SWlin2006.16107.cnf	0.28	0.86	0.1	0.1	0.42	0.5	0.12	0.38	0.42	0.48	0.12	0.62	0.7	0.64	0.12	0.5	0.3	0.1	0.72	1.88
SWGCP_only_5000/SWlin2006.16108.cnf	0.24	0.52	0.1	0.1	0.38	0.36	0.12	0.32	0.2	0.36	0.12	0.58	0.74	0.44	0.1	0.54	0.3	0.1	0.72	1.48
SWGCP_only_5000/SWlin2006.16109.cnf	0.26	0.76	0.08	0.12	0.42	0.38	0.12	0.4	0.7	0.5	0.12	0.24	0.96	0.68	0.12	0.46	0.4	0.12	0.86	1.9
SWGCP_only_5000/SWlin2006.16110.cnf	0.24	0.58	0.1	0.12	0.42	0.4	0.14	0.42	0.44	0.38	0.14	0.56	0.48	0.66	0.1	0.48	0.3	0.12	0.74	1.96
SWGCP_only_5000/SWlin2006.16111.cnf	0.16	0.46	0.06	0.06	0.28	0.22	0.08	0.24	0.32	0.28	0.08	0.36	0.56	0.34	0.06	0.28	0.18	0.08	0.52	0.82
SWGCP_only_5000/SWlin2006.16112.cnf	0.24	0.36	0.12	0.1	0.4	0.38	0.14	0.38	0.44	0.34	0.14	0.48	0.44	0.4	0.12	0.5	0.26	0.12	0.74	1.92
SWGCP_only_5000/SWlin2006.16113.cnf	0.28	0.84	0.12	0.12	0.36	0.4	0.14	0.44	0.46	0.48	0.14	0.54	0.1	0.56	0.12	0.52	0.28	0.12	0.94	1.86
SWGCP_only_5000/SWlin2006.16114.cnf	0.26	0.66	0.08	0.1	0.34	0.4	0.1	0.2	0.44	0.4	0.12	0.56	0.68	0.48	0.1	0.28	0.18	0.1	0.94	1.42
SWGCP_only_5000/SWlin2006.16115.cnf	0.2	0.68	0.08	0.1	0.34	0.34	0.1	0.36	0.52	0.38	0.1	0.52	0.76	0.52	0.1	0.5	0.26	0.14	0.8	1.42
SWGCP_only_5000/SWlin2006.16116.cnf	0.26	0.54	0.1	0.1	0.42	0.36	0.14	0.36	0.38	0.42	0.14	0.68	1.1	0.46	0.1	0.42	0.32	0.12	1.0	1.76
SWGCP_only_5000/SWlin2006.16117.cnf	0.14	0.28	0.08	0.08	0.16	0.2	0.08	0.18	0.26	0.22	0.08	0.32	0.4	0.24	0.06	0.28	0.16	0.04	0.42	0.6
SWGCP_only_5000/SWlin2006.16118.cnf	0.24	0.18	0.14	0.12	0.38	0.52	0.12	0.36	0.32	0.48	0.14	0.64	0.78	0.46	0.12	0.52	0.38	0.12	1.28	1.9
SWGCP_only_5000/SWlin2006.16119.cnf	0.28	0.52	0.08	0.1	0.42	0.36	0.12	0.36	0.1	0.38	0.1	0.3	0.8	0.44	0.1	0.16	0.28	0.1	0.74	1.58
SWGCP_only_5000/SWlin2006.16120.cnf	0.18	0.66	0.1	0.1	0.36	0.4	0.14	0.3	0.2	0.16	0.12	0.52	0.82	0.6	0.1	0.56	0.24	0.12	1.0	1.6
SWGCP_only_5000/SWlin2006.16121.cnf	0.06	0.16	0.1	0.08	0.36	0.38	0.1	0.22	0.4	0.1	0.1	0.52	0.08	0.58	0.1	0.14	0.16	0.1	0.62	1.22
SWGCP_only_5000/SWlin2006.16122.cnf	0.22	0.12	0.1	0.1	0.32	0.34	0.1	0.3	0.2	0.32	0.1	0.48	0.54	0.5	0.08	0.42	0.24	0.1	0.32	1.18
SWGCP_only_5000/SWlin2006.16123.cnf	0.22	0.38	0.12	0.1	0.42	0.38	0.1	0.32	0.16	0.44	0.12	0.48	0.96	0.56	0.12	0.14	0.28	0.1	0.96	1.52
SWGCP_only_5000/SWlin2006.16124.cnf	0.22	0.38	0.08	0.08	0.36	0.34	0.1	0.28	0.5	0.34	0.1	0.58	0.6	0.46	0.08	0.4	0.24	0.1	0.82	1.32
SWGCP_only_5000/SWlin2006.16125.cnf	0.16	0.08	0.08	0.08	0.32	0.16	0.08	0.14	0.36	0.3	0.08	0.44	0.3	0.1	0.08	0.28	0.06	0.08	0.24	0.96
SWGCP_only_5000/SWlin2006.16126.cnf	0.16	0.16	0.06	0.08	0.12	0.02	0.08	0.2	0.06	0.26	0.08	0.16	0.44	0.12	0.08	0.3	0.16	0.08	0.54	0.72
SWGCP_only_5000/SWlin2006.16127.cnf	0.28	0.22	0.12	0.12	0.5	0.42	0.12	0.4	0.46	0.4	0.12	0.58	0.48	0.68	0.1	0.52	0.28	0.1	0.82	1.74
SWGCP_only_5000/SWlin2006.16128.cnf	0.12	0.32	0.06	0.04	0.2	0.16	0.06	0.16	0.26	0.18	0.06	0.26	0.38	0.24	0.06	0.24	0.16	0.08	0.34	0.54
SWGCP_only_5000/SWlin2006.16129.cnf	0.1	0.04	0.04	0.06	0.02	0.0	0.06	0.0	0.2	0.14	0.02	0.24	0.16	0.22	0.04	0.2	0.08	0.06	0.32	0.4
SWGCP_only_5000/SWlin2006.16130.cnf	0.24	0.74	0.1	0.1	0.4	0.36	0.1	0.36	0.4	0.46	0.12	0.68	0.74	0.56	0.1	0.58	0.26	0.1	0.96	1.64
SWGCP_only_5000/SWlin2006.16131.cnf	0.14	0.36	0.04	0.04	0.14	0.08	0.02	0.16	0.24	0.2	0.06	0.3	0.44	0.26	0.02	0.24	0.1	0.06	0.44	0.56
SWGCP_only_5000/SWlin2006.16132.cnf	0.18	0.38	0.08	0.1	0.3	0.28	0.08	0.22	0.32	0.26	0.1	0.38	0.4	0.36	0.06	0.34	0.18	0.08	0.58	1.04
SWGCP_only_5000/SWlin2006.16133.cnf	0.2	0.72	0.06	0.1	0.38	0.3	0.12	0.24	0.36	0.4	0.12	0.6	0.44	0.52	0.1	0.46	0.24	0.1	0.94	1.38
SWGCP_only_5000/SWlin2006.16134.cnf	0.2	0.64	0.08	0.08	0.38	0.3	0.1	0.3	0.38	0.36	0.1	0.58	0.48	0.34	0.1	0.4	0.24	0.1	0.62	1.32
SWGCP_only_5000/SWlin2006.16135.cnf	0.22	0.44	0.08	0.08	0.34	0.32	0.12	0.3	0.48	0.34	0.1	0.46	0.82	0.5	0.08	0.42	0.28	0.08	0.68	1.24
SWGCP_only_5000/SWlin2006.16136.cnf	0.2	0.5	0.06	0.08	0.32	0.3	0.1	0.26	0.46	0.32	0.1	0.36	0.82	0.4	0.08	0.38	0.22	0.1	0.8	1.12
SWGCP_only_5000/SWlin2006.16137.cnf	0.26	0.52	0.08	0.1	0.4	0.36	0.14	0.34	0.46	0.42	0.12	0.68	0.68	0.6	0.1	0.42	0.26	0.12	0.6	1.64
SWGCP_only_5000/SWlin2006.16138.cnf	0.2	0.6	0.08	0.08	0.34	0.3	0.1	0.28	0.36	0.36	0.12	0.4	0.5	0.4	0.06	0.38	0.26	0.1	0.78	1.14
SWGCP_only_5000/SWlin2006.16139.cnf	0.22	0.56	0.08	0.1	0.3	0.38	0.1	0.32	0.46	0.32	0.12	0.28	0.42	0.34	0.1	0.42	0.3	0.1	0.66	1.44
SWGCP_only_5000/SWlin2006.16140.cnf	0.24	0.52	0.12	0.14	0.38	0.38	0.14	0.38	0.48	0.42	0.14	0.5	0.6	0.6	0.12	0.5	0.32	0.12	1.0	2.02
SWGCP_only_5000/SWlin2006.16141.cnf	0.18	0.1	0.06	0.06	0.26	0.22	0.08	0.22	0.14	0.02	0.08	0.38	0.5	0.04	0.06	0.3	0.08	0.06	0.48	0.7
SWGCP_only_5000/SWlin2006.16142.cnf	0.22	0.62	0.1	0.06	0.36	0.36	0.1	0.32	0.2	0.38	0.12	0.14	0.82	0.5	0.08	0.42	0.26	0.1	0.82	1.24
SWGCP_only_5000/SWlin2006.16143.cnf	0.28	0.38	0.12	0.12	0.44	0.38	0.14	0.42	0.5	0.42	0.14	0.66	0.74	0.5	0.12	0.58	0.36	0.1	0.8	2.0
SWGCP_only_5000/SWlin2006.16144.cnf	0.3	0.62	0.12	0.1	0.42	0.46	0.12	0.4	0.38	0.52	0.14	0.74	0.34	0.22	0.12	0.56	0.3	0.12	0.84	1.76
SWGCP_only_5000/SWlin2006.16145.cnf	0.16	0.42	0.06	0.06	0.26	0.24	0.06	0.22	0.3	0.26	0.08	0.4	0.5	0.36	0.06	0.32	0.2	0.08	0.56	0.76
SWGCP_only_5000/SWlin2006.16146.cnf	0.2	0.64	0.06	0.1	0.38	0.36	0.12	0.1	0.42	0.4	0.1	0.62	0.62	0.48	0.1	0.18	0.22	0.1	0.78	1.28
SWGCP_only_5000/SWlin2006.16147.cnf	0.22	0.36	0.1	0.1	0.34	0.28	0.1	0.28	0.28	0.34	0.1	0.44	0.44	0.26	0.08	0.42	0.24	0.12	0.54	1.34
SWGCP_only_5000/SWlin2006.16148.cnf	0.3	0.54	0.12	0.12	0.36	0.52	0.12	0.36	0.46	0.46	0.12	0.56	0.48	0.62	0.12	0.6	0.36	0.12	0.86	2.0
SWGCP_only_5000/SWlin2006.16149.cnf	0.24	0.88	0.08	0.1	0.42	0.4	0.1	0.32	0.5	0.38	0.12	0.54	0.62	0.44	0.12	0.5	0.24	0.1	0.82	1.74
SWGCP_only_5000/SWlin2006.16150.cnf	0.16	0.62	0.08	0.08	0.3	0.26	0.1	0.28	0.36	0.3	0.1	0.4	0.7	0.46	0.08	0.38	0.24	0.08	0.74	1.04
SWGCP_only_5000/SWlin2006.16151.cnf	0.24	0.76	0.08	0.06	0.36	0.42	0.1	0.4	0.44	0.42	0.14	0.52	0.78	0.68	0.12	0.48	0.26	0.1	0.54	1.6
SWGCP_only_5000/SWlin2006.16152.cnf	0.06	0.5	0.06	0.08	0.24	0.14	0.08	0.22	0.34	0.06	0.1	0.4	0.14	0.06	0.08	0.34	0.2	0.08	0.02	0.8
SWGCP_only_5000/SWlin2006.16153.cnf	0.14	0.16	0.08	0.08	0.18	0.16	0.06	0.16	0.18	0.18	0.06	0.26	0.18	0.16	0.08	0.24	0.12	0.08	0.44	0.62
SWGCP_only_5000/SWlin2006.16154.cnf	0.24	0.12	0.08	0.08	0.34	0.36	0.1	0.34	0.12	0.4	0.1	0.42	0.46	0.42	0.08	0.52	0.16	0.12	0.68	1.34
SWGCP_only_5000/SWlin2006.16155.cnf	0.26	0.78	0.1	0.1	0.4	0.38	0.12	0.22	0.44	0.16	0.12	0.58	0.22	0.58	0.1	0.48	0.28	0.12	0.86	1.5
SWGCP_only_5000/SWlin2006.16156.cnf	0.28	0.54	0.08	0.08	0.34	0.34	0.08	0.22	0.5	0.04	0.14	0.7	0.84	0.48	0.1	0.14	0.26	0.1	0.66	1.36
SWGCP_only_5000/SWlin2006.16157.cnf	0.12	0.14	0.04	0.04	0.14	0.14	0.06	0.12	0.14	0.12	0.06	0.18	0.18	0.16	0.04	0.16	0.12	0.06	0.22	0.42
SWGCP_only_5000/SWlin2006.16158.cnf	0.16	0.2	0.06	0.06	0.28	0.06	0.06	0.02	0.14	0.26	0.1	0.02	0.14	0.08	0.08	0.34	0.22	0.08	0.56	0.88
SWGCP_only_5000/SWlin2006.16159.cnf	0.26	0.42	0.12	0.1	0.44	0.34	0.12	0.36	0.12	0.52	0.14	0.68	0.74	0.4	0.12	0.48	0.3	0.1	1.0	1.94
SWGCP_only_5000/SWlin2006.16160.cnf	0.1	0.28	0.04	0.06	0.12	0.14	0.06	0.14	0.22	0.16	0.06	0.24	0.36	0.2	0.06	0.2	0.14	0.06	0.34	0.44
SWGCP_only_5000/SWlin2006.16161.cnf	0.3	0.94	0.1	0.12	0.48	0.54	0.12	0.36	0.7	0.5	0.14	0.54	0.26	0.26	0.12	0.62	0.32	0.14	0.8	1.96
SWGCP_only_5000/SWlin2006.16162.cnf	0.14	0.52	0.08	0.08	0.28	0.24	0.08	0.08	0.38	0.12	0.1	0.08	0.6	0.38	0.06	0.34	0.1	0.08	0.34	0.9
SWGCP_only_5000/SWlin2006.16163.cnf	0.24	0.38	0.12	0.1	0.32	0.32	0.12	0.34	0.34	0.32	0.14	0.42	0.48	0.4	0.12	0.42	0.22	0.1	0.68	1.56
SWGCP_only_5000/SWlin2006.16164.cnf	0.24	0.04	0.1	0.1	0.36	0.36	0.12	0.38	0.5	0.44	0.12	0.56	0.62	0.52	0.1	0.14	0.32	0.1	0.86	1.48
SWGCP_only_5000/SWlin2006.16165.cnf	0.24	0.42	0.08	0.08	0.4	0.38	0.12	0.3	0.54	0.36	0.12	0.64	0.3	0.5	0.08	0.4	0.32	0.1	0.9	1.48
SWGCP_only_5000/SWlin2006.16166.cnf	0.1	0.18	0.04	0.04	0.14	0.14	0.08	0.14	0.16	0.14	0.06	0.22	0.24	0.2	0.04	0.18	0.12	0.06	0.3	0.42
SWGCP_only_5000/SWlin2006.16167.cnf	0.1	0.16	0.06	0.04	0.12	0.14	0.06	0.14	0.16	0.14	0.08	0.18	0.24	0.16	0.06	0.16	0.1	0.08	0.3	0.42
SWGCP_only_5000/SWlin2006.16168.cnf	0.22	0.58	0.06	0.1	0.36	0.38	0.1	0.3	0.42	0.4	0.1	0.5	0.12	0.44	0.08	0.16	0.22	0.08	0.86	1.22
SWGCP_only_5000/SWlin2006.16169.cnf	0.18	0.26	0.08	0.08	0.3	0.26	0.08	0.22	0.3	0.3	0.08	0.4	0.42	0.34	0.08	0.34	0.16	0.08	0.6	1.02
SWGCP_only_5000/SWlin2006.16170.cnf	0.24	0.34	0.1	0.1	0.38	0.3	0.12	0.34	0.3	0.36	0.12	0.48	0.38	0.3	0.1	0.4	0.22	0.1	0.64	1.76
SWGCP_only_5000/SWlin2006.16171.cnf	0.14	0.54	0.06	0.08	0.18	0.32	0.08	0.28	0.0	0.24	0.08	0.42	0.6	0.22	0.06	0.38	0.18	0.1	0.6	0.96
SWGCP_only_5000/SWlin2006.16172.cnf	0.1	0.5	0.06	0.06	0.04	0.2	0.06	0.02	0.04	0.28	0.08	0.4	0.6	0.38	0.08	0.28	0.04	0.06	0.16	0.74
SWGCP_only_5000/SWlin2006.16173.cnf	0.14	0.38	0.06	0.04	0.2	0.2	0.06	0.2	0.26	0.2	0.08	0.32	0.42	0.32	0.08	0.26	0.16	0.08	0.42	0.7
SWGCP_only_5000/SWlin2006.16174.cnf	0.02	0.36	0.04	0.06	0.02	0.02	0.02	0.18	0.0	0.04	0.08	0.32	0.08	0.28	0.06	0.06	0.14	0.06	0.44	0.56
SWGCP_only_5000/SWlin2006.16175.cnf	0.2	0.58	0.06	0.08	0.28	0.16	0.1	0.26	0.38	0.28	0.08	0.4	0.06	0.1	0.08	0.4	0.06	0.1	0.6	1.02
SWGCP_only_5000/SWlin2006.16176.cnf	0.14	0.36	0.04	0.06	0.24	0.24	0.08	0.22	0.28	0.26	0.06	0.36	0.44	0.3	0.06	0.3	0.2	0.08	0.48	0.82
SWGCP_only_5000/SWlin2006.16177.cnf	0.18	0.5	0.06	0.08	0.3	0.24	0.08	0.24	0.36	0.3	0.08	0.46	0.56	0.44	0.1	0.36	0.2	0.08	0.52	0.92
SWGCP_only_5000/SWlin2006.16178.cnf	0.22	0.74	0.08	0.08	0.36	0.36	0.1	0.34	0.54	0.36	0.12	0.56	0.54	0.46	0.08	0.4	0.24	0.1	0.92	1.34
SWGCP_only_5000/SWlin2006.16179.cnf	0.06	0.22	0.08	0.08	0.28	0.3	0.1	0.26	0.04	0.08	0.08	0.08	0.62	0.2	0.08	0.34	0.2	0.08	0.14	1.0
SWGCP_only_5000/SWlin2006.16180.cnf	0.06	0.04	0.04	0.06	0.06	0.04	0.06	0.18	0.02	0.02	0.06	0.38	0.02	0.06	0.04	0.08	0.02	0.06	0.1	0.74
SWGCP_only_5000/SWlin2006.16181.cnf	0.08	0.26	0.08	0.04	0.26	0.02	0.08	0.22	0.0	0.04	0.08	0.34	0.02	0.06	0.06	0.32	0.04	0.1	0.54	0.76
SWGCP_only_5000/SWlin2006.16182.cnf	0.26	0.68	0.1	0.12	0.44	0.42	0.08	0.4	0.48	0.46	0.14	0.84	0.48	0.62	0.1	0.5	0.26	0.12	0.56	1.88
SWGCP_only_5000/SWlin2006.16183.cnf	0.28	0.42	0.1	0.08	0.4	0.34	0.14	0.38	0.36	0.44	0.14	0.64	0.8	0.4	0.08	0.5	0.26	0.12	0.74	1.74
SWGCP_only_5000/SWlin2006.16184.cnf	0.2	0.24	0.1	0.08	0.28	0.28	0.1	0.28	0.3	0.28	0.1	0.44	0.34	0.32	0.08	0.42	0.2	0.1	0.82	1.34
SWGCP_only_5000/SWlin2006.16185.cnf	0.14	0.42	0.04	0.06	0.04	0.2	0.08	0.2	0.3	0.24	0.06	0.34	0.4	0.28	0.08	0.04	0.04	0.06	0.02	0.62
SWGCP_only_5000/SWlin2006.16186.cnf	0.1	0.08	0.08	0.08	0.06	0.04	0.08	0.08	0.16	0.04	0.1	0.22	0.08	0.02	0.06	0.4	0.06	0.08	0.7	0.98
SWGCP_only_5000/SWlin2006.16187.cnf	0.26	0.54	0.1	0.1	0.32	0.34	0.12	0.32	0.56	0.34	0.14	0.66	0.82	0.52	0.12	0.46	0.26	0.1	1.0	1.72
SWGCP_only_5000/SWlin2006.16188.cnf	0.2	0.38	0.08	0.06	0.28	0.32	0.1	0.26	0.42	0.3	0.1	0.5	0.74	0.38	0.1	0.38	0.24	0.1	0.68	1.04
SWGCP_only_5000/SWlin2006.16189.cnf	0.24	0.74	0.1	0.1	0.1	0.36	0.1	0.32	0.48	0.42	0.1	0.54	0.84	0.1	0.1	0.34	0.26	0.1	0.68	1.42
SWGCP_only_5000/SWlin2006.16190.cnf	0.14	0.34	0.06	0.08	0.26	0.22	0.04	0.22	0.3	0.0	0.08	0.4	0.52	0.04	0.08	0.3	0.18	0.08	0.54	0.7
SWGCP_only_5000/SWlin2006.16191.cnf	0.14	0.42	0.08	0.04	0.24	0.22	0.08	0.22	0.28	0.24	0.04	0.38	0.5	0.32	0.06	0.28	0.16	0.08	0.5	0.7
SWGCP_only_5000/SWlin2006.16192.cnf	0.24	0.36	0.1	0.1	0.36	0.38	0.08	0.32	0.28	0.38	0.12	0.44	0.44	0.36	0.1	0.46	0.26	0.12	0.58	1.68
SWGCP_only_5000/SWlin2006.16193.cnf	0.16	0.4	0.06	0.06	0.26	0.26	0.08	0.26	0.26	0.26	0.1	0.36	0.56	0.38	0.06	0.38	0.2	0.08	0.64	0.9
SWGCP_only_5000/SWlin2006.16194.cnf	0.18	0.1	0.08	0.08	0.3	0.3	0.1	0.28	0.28	0.28	0.06	0.36	0.84	0.34	0.06	0.44	0.2	0.12	0.1	1.1
SWGCP_only_5000/SWlin2006.16195.cnf	0.1	0.1	0.04	0.06	0.12	0.2	0.08	0.24	0.34	0.02	0.08	0.44	0.02	0.04	0.08	0.08	0.08	0.1	0.5	0.86
SWGCP_only_5000/SWlin2006.16196.cnf	0.1	0.3	0.06	0.06	0.16	0.16	0.06	0.14	0.2	0.18	0.08	0.22	0.32	0.22	0.04	0.22	0.1	0.08	0.36	0.46
SWGCP_only_5000/SWlin2006.16197.cnf	0.24	0.56	0.08	0.12	0.4	0.4	0.1	0.32	0.52	0.4	0.12	0.52	0.9	0.48	0.12	0.5	0.26	0.1	1.02	1.56
SWGCP_only_5000/SWlin2006.16198.cnf	0.26	0.48	0.08	0.12	0.36	0.38	0.12	0.34	0.54	0.4	0.12	0.56	0.82	0.08	0.08	0.16	0.3	0.1	0.54	1.66
SWGCP_only_5000/SWlin2006.16199.cnf	0.24	0.48	0.1	0.08	0.34	0.34	0.1	0.34	0.54	0.34	0.12	0.14	0.8	0.42	0.1	0.44	0.22	0.1	0.74	1.42
SWGCP_only_5000/SWlin2006.16200.cnf	0.22	0.4	0.08	0.08	0.28	0.32	0.1	0.3	0.4	0.36	0.1	0.46	0.56	0.34	0.1	0.38	0.26	0.1	0.62	1.3
SWGCP_only_5000/SWlin2006.16201.cnf	0.28	0.38	0.08	0.1	0.34	0.32	0.1	0.34	0.38	0.34	0.12	0.58	0.1	0.48	0.08	0.5	0.28	0.1	0.9	1.36
SWGCP_only_5000/SWlin2006.16202.cnf	0.3	0.46	0.12	0.12	0.48	0.44	0.14	0.34	0.6	0.36	0.14	0.5	0.6	0.52	0.1	0.5	0.32	0.12	1.04	1.92
SWGCP_only_5000/SWlin2006.16203.cnf	0.14	0.22	0.08	0.1	0.38	0.16	0.1	0.36	0.22	0.16	0.1	0.6	0.86	0.46	0.1	0.3	0.12	0.1	0.22	1.36
SWGCP_only_5000/SWlin2006.16204.cnf	0.18	0.34	0.04	0.08	0.3	0.24	0.1	0.24	0.28	0.28	0.08	0.42	0.36	0.28	0.08	0.32	0.18	0.08	0.52	0.98
SWGCP_only_5000/SWlin2006.16205.cnf	0.2	0.4	0.08	0.08	0.32	0.3	0.08	0.24	0.38	0.36	0.12	0.46	0.58	0.38	0.08	0.42	0.22	0.12	0.68	1.16
SWGCP_only_5000/SWlin2006.16206.cnf	0.26	0.46	0.1	0.12	0.4	0.4	0.12	0.38	0.4	0.4	0.14	0.62	0.38	0.46	0.12	0.4	0.32	0.14	0.84	2.02
SWGCP_only_5000/SWlin2006.16207.cnf	0.18	0.1	0.1	0.06	0.34	0.22	0.1	0.32	0.04	0.34	0.1	0.1	0.74	0.56	0.08	0.4	0.3	0.08	0.88	1.24
SWGCP_only_5000/SWlin2006.16208.cnf	0.26	0.82	0.12	0.12	0.4	0.4	0.14	0.38	0.44	0.18	0.14	0.7	1.18	0.72	0.1	0.52	0.38	0.12	0.58	1.94
SWGCP_only_5000/SWlin2006.16209.cnf	0.2	0.1	0.06	0.06	0.04	0.26	0.08	0.26	0.38	0.12	0.08	0.44	0.62	0.18	0.08	0.14	0.08	0.1	0.7	0.94
SWGCP_only_5000/SWlin2006.16210.cnf	0.14	0.0	0.04	0.06	0.08	0.04	0.06	0.06	0.0	0.08	0.1	0.02	0.06	0.02	0.06	0.04	0.16	0.08	0.48	0.68
SWGCP_only_5000/SWlin2006.16211.cnf	0.14	0.3	0.06	0.04	0.22	0.18	0.08	0.2	0.24	0.22	0.08	0.28	0.34	0.24	0.08	0.26	0.14	0.08	0.44	0.7
SWGCP_only_5000/SWlin2006.16212.cnf	0.2	0.06	0.12	0.08	0.04	0.38	0.08	0.32	0.5	0.34	0.12	0.54	0.88	0.58	0.08	0.46	0.26	0.1	0.68	1.3
SWGCP_only_5000/SWlin2006.16213.cnf	0.08	0.14	0.06	0.04	0.16	0.16	0.08	0.14	0.16	0.16	0.08	0.22	0.2	0.16	0.06	0.18	0.12	0.08	0.28	0.48
SWGCP_only_5000/SWlin2006.16214.cnf	0.18	0.08	0.08	0.1	0.3	0.06	0.08	0.24	0.36	0.2	0.08	0.48	0.64	0.34	0.08	0.34	0.06	0.1	0.56	0.9
SWGCP_only_5000/SWlin2006.16215.cnf	0.1	0.6	0.1	0.08	0.3	0.06	0.1	0.28	0.04	0.3	0.1	0.52	0.74	0.04	0.08	0.34	0.2	0.08	0.66	1.0
SWGCP_only_5000/SWlin2006.16216.cnf	0.22	0.38	0.1	0.08	0.34	0.32	0.1	0.3	0.4	0.32	0.12	0.6	0.56	0.04	0.08	0.48	0.22	0.1	0.7	1.24
SWGCP_only_5000/SWlin2006.16217.cnf	0.16	0.2	0.04	0.06	0.18	0.16	0.06	0.14	0.18	0.16	0.08	0.2	0.24	0.22	0.08	0.2	0.14	0.06	0.32	0.5
SWGCP_only_5000/SWlin2006.16218.cnf	0.12	0.16	0.06	0.06	0.06	0.2	0.06	0.02	0.1	0.12	0.08	0.28	0.5	0.32	0.06	0.24	0.16	0.06	0.48	0.66
SWGCP_only_5000/SWlin2006.16219.cnf	0.14	0.32	0.06	0.08	0.24	0.22	0.1	0.24	0.26	0.26	0.08	0.36	0.44	0.32	0.06	0.28	0.2	0.08	0.38	0.88
SWGCP_only_5000/SWlin2006.16220.cnf	0.2	0.6	0.1	0.1	0.34	0.36	0.1	0.32	0.36	0.32	0.08	0.5	0.56	0.52	0.1	0.4	0.24	0.1	0.64	1.36
SWGCP_only_5000/SWlin2006.16221.cnf	0.24	0.62	0.1	0.1	0.38	0.2	0.12	0.16	0.62	0.36	0.12	0.66	0.28	0.14	0.12	0.34	0.28	0.1	0.38	1.58
SWGCP_only_5000/SWlin2006.16222.cnf	0.3	0.58	0.12	0.12	0.48	0.18	0.14	0.34	0.5	0.54	0.12	0.54	0.66	0.48	0.08	0.56	0.24	0.12	1.02	1.86
SWGCP_only_5000/SWlin2006.16223.cnf	0.24	0.5	0.08	0.08	0.4	0.36	0.1	0.32	0.54	0.44	0.12	0.56	0.64	0.62	0.1	0.5	0.32	0.06	0.84	1.46
SWGCP_only_5000/SWlin2006.16224.cnf	0.12	0.2	0.04	0.06	0.16	0.16	0.08	0.14	0.16	0.16	0.06	0.24	0.26	0.22	0.04	0.2	0.12	0.06	0.28	0.48
SWGCP_only_5000/SWlin2006.16225.cnf	0.24	0.48	0.12	0.12	0.42	0.24	0.12	0.32	0.04	0.36	0.12	0.42	0.22	0.48	0.1	0.44	0.3	0.1	1.0	1.5
SWGCP_only_5000/SWlin2006.16226.cnf	0.16	0.42	0.08	0.08	0.24	0.22	0.06	0.22	0.32	0.24	0.06	0.28	0.56	0.34	0.08	0.3	0.18	0.06	0.5	0.74
SWGCP_only_5000/SWlin2006.16227.cnf	0.2	0.56	0.1	0.08	0.3	0.28	0.1	0.3	0.32	0.32	0.1	0.44	0.56	0.28	0.08	0.36	0.16	0.1	0.56	1.14
SWGCP_only_5000/SWlin2006.16228.cnf	0.16	0.52	0.1	0.08	0.3	0.28	0.1	0.24	0.38	0.32	0.1	0.46	0.5	0.36	0.08	0.38	0.18	0.08	0.78	1.14
SWGCP_only_5000/SWlin2006.16229.cnf	0.12	0.02	0.06	0.04	0.02	0.18	0.06	0.18	0.0	0.04	0.08	0.06	0.44	0.0	0.06	0.0	0.12	0.06	0.0	0.56
SWGCP_only_5000/SWlin2006.16230.cnf	0.16	0.36	0.06	0.06	0.24	0.22	0.1	0.24	0.28	0.2	0.1	0.38	0.56	0.26	0.08	0.34	0.2	0.08	0.52	0.84
SWGCP_only_5000/SWlin2006.16231.cnf	0.26	0.44	0.08	0.12	0.38	0.4	0.14	0.36	0.36	0.36	0.12	0.64	0.54	0.36	0.12	0.48	0.24	0.12	0.78	1.8
SWGCP_only_5000/SWlin2006.16232.cnf	0.22	0.36	0.08	0.08	0.26	0.26	0.1	0.26	0.36	0.3	0.1	0.42	0.46	0.38	0.1	0.34	0.2	0.1	0.56	1.2
SWGCP_only_5000/SWlin2006.16233.cnf	0.22	0.48	0.08	0.1	0.34	0.34	0.1	0.38	0.42	0.44	0.12	0.48	0.72	0.34	0.08	0.48	0.28	0.12	0.88	1.54
SWGCP_only_5000/SWlin2006.16234.cnf	0.26	0.38	0.1	0.1	0.36	0.38	0.12	0.34	0.48	0.44	0.12	0.44	0.06	0.56	0.1	0.42	0.32	0.12	0.9	1.52
SWGCP_only_5000/SWlin2006.16235.cnf	0.28	0.5	0.12	0.12	0.38	0.36	0.14	0.4	0.2	0.14	0.14	0.4	0.7	0.56	0.1	0.46	0.28	0.1	0.92	1.78
SWGCP_only_5000/SWlin2006.16236.cnf	0.24	0.36	0.1	0.12	0.34	0.34	0.12	0.34	0.28	0.38	0.12	0.4	0.58	0.36	0.08	0.54	0.26	0.12	0.66	1.46
SWGCP_only_5000/SWlin2006.16237.cnf	0.22	0.34	0.08	0.1	0.26	0.28	0.12	0.18	0.52	0.34	0.12	0.64	0.5	0.54	0.08	0.48	0.28	0.12	1.02	1.42
SWGCP_only_5000/SWlin2006.16238.cnf	0.26	0.58	0.1	0.1	0.44	0.34	0.12	0.42	0.48	0.44	0.14	0.46	0.98	0.4	0.12	0.48	0.28	0.12	1.0	1.78
SWGCP_only_5000/SWlin2006.16239.cnf	0.2	0.36	0.1	0.1	0.36	0.32	0.1	0.3	0.38	0.38	0.12	0.52	0.42	0.34	0.1	0.38	0.24	0.08	0.64	1.46
SWGCP_only_5000/SWlin2006.16240.cnf	0.2	0.48	0.06	0.08	0.28	0.26	0.08	0.22	0.38	0.2	0.08	0.42	0.1	0.04	0.06	0.36	0.18	0.1	0.66	0.88
SWGCP_only_5000/SWlin2006.16241.cnf	0.26	0.08	0.1	0.1	0.44	0.42	0.12	0.22	0.58	0.48	0.12	0.76	1.0	0.52	0.1	0.42	0.3	0.12	0.62	1.74
SWGCP_only_5000/SWlin2006.16242.cnf	0.2	0.5	0.06	0.06	0.26	0.2	0.06	0.2	0.32	0.24	0.08	0.4	0.54	0.36	0.06	0.34	0.16	0.08	0.54	0.76
SWGCP_only_5000/SWlin2006.16243.cnf	0.16	0.06	0.08	0.06	0.3	0.26	0.12	0.22	0.0	0.28	0.06	0.12	0.6	0.04	0.08	0.3	0.16	0.08	0.2	0.9
SWGCP_only_5000/SWlin2006.16244.cnf	0.22	0.38	0.1	0.1	0.36	0.4	0.12	0.36	0.1	0.18	0.12	0.54	0.74	0.46	0.12	0.48	0.3	0.1	0.76	1.52
SWGCP_only_5000/SWlin2006.16245.cnf	0.24	0.48	0.1	0.12	0.42	0.38	0.12	0.36	0.48	0.44	0.1	0.5	0.44	0.5	0.12	0.5	0.28	0.12	0.14	1.64
SWGCP_only_5000/SWlin2006.16246.cnf	0.16	0.42	0.06	0.08	0.26	0.22	0.08	0.22	0.32	0.18	0.06	0.4	0.54	0.38	0.06	0.28	0.18	0.08	0.56	0.8
SWGCP_only_5000/SWlin2006.16247.cnf	0.28	0.5	0.12	0.12	0.4	0.38	0.12	0.42	0.36	0.46	0.14	0.56	0.72	0.44	0.12	0.5	0.36	0.14	0.76	1.96
SWGCP_only_5000/SWlin2006.16248.cnf	0.12	0.34	0.04	0.06	0.18	0.18	0.08	0.18	0.24	0.2	0.08	0.28	0.4	0.28	0.06	0.22	0.12	0.08	0.38	0.5
SWGCP_only_5000/SWlin2006.16249.cnf	0.3	0.42	0.1	0.1	0.4	0.4	0.12	0.38	0.24	0.42	0.14	0.72	0.14	0.68	0.1	0.54	0.26	0.12	1.04	1.92
SWGCP_only_5000/SWlin2006.16250.cnf	0.1	0.56	0.08	0.06	0.3	0.1	0.1	0.26	0.04	0.3	0.1	0.02	0.06	0.48	0.08	0.42	0.2	0.08	0.62	1.02
SWGCP_only_5000/SWlin2006.16251.cnf	0.28	0.48	0.12	0.1	0.44	0.46	0.12	0.36	0.44	0.48	0.12	0.7	0.74	0.68	0.12	0.6	0.22	0.12	0.76	1.78
SWGCP_only_5000/SWlin2006.16252.cnf	0.14	0.12	0.1	0.1	0.46	0.44	0.12	0.4	0.62	0.48	0.12	0.72	1.0	0.34	0.12	0.56	0.28	0.12	0.84	1.76
SWGCP_only_5000/SWlin2006.16253.cnf	0.02	0.02	0.06	0.06	0.2	0.0	0.06	0.2	0.02	0.22	0.06	0.3	0.32	0.28	0.06	0.28	0.16	0.08	0.08	0.62
SWGCP_only_5000/SWlin2006.16254.cnf	0.22	0.18	0.08	0.1	0.34	0.4	0.1	0.32	0.42	0.4	0.1	0.54	0.88	0.08	0.08	0.48	0.3	0.1	0.56	1.42
SWGCP_only_5000/SWlin2006.16255.cnf	0.14	0.18	0.08	0.1	0.24	0.2	0.06	0.2	0.3	0.24	0.08	0.34	0.02	0.34	0.06	0.3	0.16	0.08	0.54	0.74
SWGCP_only_5000/SWlin2006.16256.cnf	0.14	0.22	0.06	0.06	0.22	0.18	0.08	0.2	0.2	0.24	0.06	0.32	0.26	0.22	0.06	0.28	0.16	0.08	0.34	0.68
SWGCP_only_5000/SWlin2006.16257.cnf	0.18	0.5	0.08	0.08	0.1	0.2	0.1	0.28	0.38	0.34	0.08	0.42	0.52	0.04	0.08	0.34	0.08	0.08	0.64	1.0
SWGCP_only_5000/SWlin2006.16258.cnf	0.2	0.2	0.08	0.06	0.04	0.26	0.08	0.24	0.06	0.32	0.1	0.46	0.06	0.04	0.08	0.4	0.06	0.08	0.18	0.98
SWGCP_only_5000/SWlin2006.16259.cnf	0.22	0.52	0.08	0.08	0.3	0.28	0.1	0.3	0.3	0.36	0.1	0.44	0.52	0.42	0.08	0.48	0.2	0.08	0.64	1.12
SWGCP_only_5000/SWlin2006.16260.cnf	0.06	0.06	0.06	0.06	0.3	0.26	0.1	0.22	0.32	0.14	0.1	0.42	0.08	0.36	0.06	0.32	0.06	0.1	0.62	0.88
SWGCP_only_5000/SWlin2006.16261.cnf	0.24	0.7	0.1	0.1	0.38	0.3	0.1	0.38	0.3	0.4	0.1	0.52	0.84	0.36	0.12	0.4	0.3	0.14	0.84	1.64
SWGCP_only_5000/SWlin2006.16262.cnf	0.2	0.16	0.08	0.06	0.38	0.2	0.1	0.28	0.42	0.38	0.1	0.12	0.8	0.44	0.1	0.46	0.26	0.12	0.88	1.26
SWGCP_only_5000/SWlin2006.16263.cnf	0.24	0.62	0.08	0.08	0.36	0.32	0.1	0.26	0.44	0.32	0.12	0.5	0.62	0.34	0.1	0.42	0.26	0.1	0.64	1.2
SWGCP_only_5000/SWlin2006.16264.cnf	0.2	0.1	0.08	0.08	0.36	0.3	0.1	0.34	0.44	0.36	0.12	0.52	0.36	0.28	0.1	0.42	0.28	0.1	0.74	1.38
SWGCP_only_5000/SWlin2006.16265.cnf	0.06	0.08	0.08	0.1	0.02	0.02	0.1	0.28	0.04	0.08	0.08	0.02	0.28	0.34	0.06	0.32	0.12	0.1	0.74	1.0
SWGCP_only_5000/SWlin2006.16266.cnf	0.26	0.2	0.12	0.1	0.36	0.42	0.12	0.36	0.22	0.36	0.1	0.68	0.78	0.66	0.1	0.48	0.28	0.12	0.88	1.66
SWGCP_only_5000/SWlin2006.16267.cnf	0.0	0.0	0.04	0.06	0.16	0.0	0.0	0.0	0.0	0.0	0.08	0.0	0.02	0.02	0.02	0.0	0.02	0.06	0.3	0.46
SWGCP_only_5000/SWlin2006.16268.cnf	0.22	0.08	0.08	0.08	0.12	0.3	0.1	0.32	0.4	0.12	0.1	0.44	0.84	0.56	0.06	0.44	0.28	0.08	0.7	1.32
SWGCP_only_5000/SWlin2006.16269.cnf	0.3	0.28	0.1	0.12	0.42	0.36	0.12	0.2	0.16	0.5	0.12	0.6	0.76	0.44	0.12	0.5	0.3	0.12	0.86	1.9
SWGCP_only_5000/SWlin2006.16270.cnf	0.16	0.34	0.06	0.08	0.3	0.26	0.08	0.24	0.32	0.28	0.1	0.42	0.7	0.34	0.08	0.28	0.18	0.08	0.48	0.9
SWGCP_only_5000/SWlin2006.16271.cnf	0.14	0.16	0.06	0.06	0.2	0.24	0.08	0.12	0.06	0.02	0.08	0.44	0.02	0.04	0.08	0.04	0.06	0.1	0.54	0.96
SWGCP_only_5000/SWlin2006.16272.cnf	0.22	0.56	0.08	0.08	0.38	0.34	0.12	0.32	0.4	0.22	0.12	0.46	0.44	0.58	0.08	0.46	0.12	0.1	0.82	1.36
SWGCP_only_5000/SWlin2006.16273.cnf	0.2	0.76	0.06	0.1	0.4	0.4	0.12	0.34	0.56	0.38	0.12	0.58	0.54	0.5	0.1	0.44	0.28	0.12	0.86	1.56
SWGCP_only_5000/SWlin2006.16274.cnf	0.12	0.24	0.04	0.08	0.18	0.18	0.08	0.14	0.18	0.18	0.06	0.26	0.28	0.22	0.06	0.22	0.14	0.06	0.34	0.54
SWGCP_only_5000/SWlin2006.16275.cnf	0.28	0.68	0.1	0.12	0.5	0.44	0.12	0.34	0.5	0.46	0.1	0.68	0.82	0.52	0.1	0.62	0.28	0.12	0.8	2.02
SWGCP_only_5000/SWlin2006.16276.cnf	0.28	0.52	0.12	0.1	0.48	0.5	0.12	0.38	0.62	0.4	0.16	0.48	0.7	0.48	0.12	0.54	0.34	0.1	1.18	1.88
SWGCP_only_5000/SWlin2006.16277.cnf	0.18	0.42	0.08	0.08	0.26	0.24	0.1	0.22	0.26	0.28	0.08	0.42	0.36	0.32	0.06	0.32	0.22	0.1	0.56	0.96
SWGCP_only_5000/SWlin2006.16278.cnf	0.02	0.0	0.04	0.06	0.0	0.02	0.06	0.02	0.0	0.16	0.04	0.0	0.0	0.08	0.06	0.04	0.0	0.08	0.36	0.48
SWGCP_only_5000/SWlin2006.16279.cnf	0.2	0.12	0.08	0.08	0.34	0.32	0.1	0.3	0.12	0.3	0.1	0.38	0.12	0.06	0.1	0.38	0.12	0.1	0.58	1.16
SWGCP_only_5000/SWlin2006.16280.cnf	0.1	0.32	0.04	0.06	0.18	0.12	0.04	0.02	0.04	0.18	0.06	0.06	0.36	0.06	0.04	0.24	0.14	0.08	0.36	0.48
SWGCP_only_5000/SWlin2006.16281.cnf	0.1	0.12	0.06	0.06	0.14	0.12	0.06	0.12	0.14	0.12	0.04	0.18	0.16	0.14	0.06	0.16	0.1	0.06	0.28	0.44
SWGCP_only_5000/SWlin2006.16282.cnf	0.04	0.18	0.08	0.08	0.28	0.24	0.1	0.24	0.0	0.08	0.1	0.08	0.14	0.4	0.06	0.02	0.16	0.08	0.42	0.94
SWGCP_only_5000/SWlin2006.16283.cnf	0.24	0.74	0.1	0.1	0.4	0.46	0.1	0.4	0.4	0.38	0.14	0.54	1.06	0.26	0.1	0.6	0.34	0.08	0.8	1.68
SWGCP_only_5000/SWlin2006.16284.cnf	0.24	0.58	0.1	0.12	0.5	0.42	0.12	0.4	0.52	0.4	0.12	0.6	0.82	0.52	0.12	0.44	0.3	0.12	1.0	1.82
SWGCP_only_5000/SWlin2006.16285.cnf	0.2	0.42	0.06	0.08	0.28	0.3	0.08	0.26	0.22	0.32	0.1	0.52	0.5	0.1	0.1	0.06	0.24	0.08	0.66	0.96
SWGCP_only_5000/SWlin2006.16286.cnf	0.16	0.06	0.06	0.06	0.04	0.26	0.08	0.04	0.02	0.26	0.1	0.02	0.14	0.36	0.08	0.04	0.14	0.1	0.6	0.84
SWGCP_only_5000/SWlin2006.16287.cnf	0.16	0.38	0.08	0.08	0.18	0.06	0.08	0.06	0.2	0.02	0.08	0.04	0.04	0.06	0.1	0.18	0.06	0.06	0.54	0.86
SWGCP_only_5000/SWlin2006.16288.cnf	0.22	0.46	0.08	0.08	0.22	0.32	0.1	0.28	0.5	0.04	0.1	0.62	0.06	0.16	0.08	0.46	0.28	0.1	0.88	1.28
SWGCP_only_5000/SWlin2006.16289.cnf	0.26	0.58	0.12	0.1	0.5	0.46	0.14	0.38	0.16	0.4	0.12	0.6	0.8	0.52	0.12	0.52	0.34	0.12	0.88	1.82
SWGCP_only_5000/SWlin2006.16290.cnf	0.08	0.04	0.08	0.08	0.08	0.1	0.1	0.26	0.02	0.32	0.08	0.02	0.06	0.32	0.08	0.32	0.08	0.1	0.68	0.96
SWGCP_only_5000/SWlin2006.16291.cnf	0.22	0.68	0.1	0.12	0.44	0.48	0.12	0.44	0.58	0.48	0.14	0.66	0.8	0.46	0.12	0.64	0.28	0.12	1.06	1.98
SWGCP_only_5000/SWlin2006.16292.cnf	0.2	0.42	0.1	0.12	0.46	0.38	0.12	0.34	0.52	0.18	0.12	0.58	0.58	0.62	0.12	0.58	0.36	0.1	0.88	1.74
SWGCP_only_5000/SWlin2006.16293.cnf	0.16	0.22	0.06	0.08	0.34	0.3	0.1	0.3	0.28	0.3	0.1	0.44	0.26	0.26	0.08	0.4	0.2	0.1	0.66	1.32
SWGCP_only_5000/SWlin2006.16294.cnf	0.24	0.5	0.1	0.08	0.3	0.3	0.1	0.32	0.42	0.3	0.12	0.46	0.6	0.44	0.1	0.38	0.2	0.1	0.7	1.24
SWGCP_only_5000/SWlin2006.16295.cnf	0.14	0.22	0.06	0.06	0.22	0.22	0.08	0.2	0.22	0.22	0.06	0.28	0.3	0.2	0.06	0.26	0.14	0.06	0.44	0.72
SWGCP_only_5000/SWlin2006.16296.cnf	0.18	0.46	0.06	0.06	0.28	0.24	0.08	0.22	0.34	0.26	0.08	0.42	0.36	0.38	0.06	0.34	0.2	0.08	0.5	0.8
SWGCP_only_5000/SWlin2006.16297.cnf	0.12	0.3	0.06	0.06	0.2	0.16	0.06	0.16	0.22	0.16	0.08	0.24	0.36	0.2	0.06	0.22	0.14	0.06	0.38	0.52
SWGCP_only_5000/SWlin2006.16298.cnf	0.26	0.52	0.1	0.12	0.42	0.44	0.12	0.4	0.54	0.4	0.12	0.64	0.54	0.42	0.12	0.54	0.28	0.12	0.96	1.94
SWGCP_only_5000/SWlin2006.16299.cnf	0.26	0.54	0.1	0.1	0.38	0.42	0.12	0.36	0.42	0.08	0.12	0.48	0.62	0.66	0.1	0.32	0.26	0.12	0.74	1.6
SWGCP_only_5000/SWlin2006.16300.cnf	0.26	0.12	0.08	0.08	0.1	0.36	0.12	0.36	0.34	0.4	0.1	0.14	0.08	0.58	0.08	0.48	0.28	0.1	0.9	1.48
SWGCP_only_5000/SWlin2006.16301.cnf	0.18	0.22	0.08	0.1	0.3	0.3	0.12	0.24	0.24	0.34	0.1	0.42	0.26	0.26	0.08	0.4	0.16	0.1	0.64	1.48
SWGCP_only_5000/SWlin2006.16302.cnf	0.18	0.48	0.08	0.08	0.26	0.28	0.08	0.26	0.1	0.08	0.08	0.44	0.14	0.24	0.06	0.06	0.18	0.08	0.62	0.92
SWGCP_only_5000/SWlin2006.16303.cnf	0.18	0.42	0.08	0.06	0.18	0.04	0.08	0.26	0.44	0.32	0.08	0.08	0.04	0.38	0.08	0.38	0.16	0.08	0.6	0.96
SWGCP_only_5000/SWlin2006.16304.cnf	0.3	0.24	0.1	0.08	0.44	0.46	0.12	0.38	0.56	0.1	0.12	0.7	0.78	0.52	0.1	0.6	0.4	0.1	0.98	1.76
SWGCP_only_5000/SWlin2006.16305.cnf	0.14	0.32	0.08	0.08	0.24	0.24	0.06	0.24	0.04	0.1	0.1	0.1	0.2	0.08	0.06	0.32	0.16	0.08	0.5	0.76
SWGCP_only_5000/SWlin2006.16306.cnf	0.18	0.22	0.08	0.08	0.3	0.26	0.1	0.04	0.38	0.34	0.08	0.14	0.58	0.2	0.06	0.4	0.08	0.08	0.64	0.98
SWGCP_only_5000/SWlin2006.16307.cnf	0.22	0.46	0.08	0.1	0.34	0.3	0.1	0.28	0.32	0.32	0.1	0.6	0.5	0.42	0.08	0.46	0.28	0.1	0.76	1.4
SWGCP_only_5000/SWlin2006.16308.cnf	0.28	0.28	0.12	0.1	0.14	0.42	0.12	0.38	0.58	0.44	0.12	0.68	0.94	0.34	0.1	0.52	0.3	0.12	1.0	1.52
SWGCP_only_5000/SWlin2006.16309.cnf	0.16	0.1	0.1	0.1	0.44	0.42	0.12	0.16	0.18	0.42	0.14	0.68	0.72	0.72	0.12	0.5	0.32	0.1	1.02	1.6
SWGCP_only_5000/SWlin2006.16310.cnf	0.22	0.46	0.08	0.1	0.34	0.34	0.1	0.3	0.46	0.34	0.1	0.62	0.68	0.4	0.1	0.38	0.26	0.1	0.72	1.32
SWGCP_only_5000/SWlin2006.16311.cnf	0.12	0.3	0.06	0.04	0.16	0.18	0.06	0.14	0.2	0.16	0.08	0.24	0.36	0.26	0.06	0.2	0.14	0.08	0.38	0.48
SWGCP_only_5000/SWlin2006.16312.cnf	0.02	0.1	0.06	0.06	0.06	0.02	0.04	0.02	0.0	0.0	0.04	0.02	0.0	0.0	0.02	0.04	0.02	0.1	0.0	0.56
SWGCP_only_5000/SWlin2006.16313.cnf	0.22	0.8	0.08	0.1	0.42	0.42	0.1	0.38	0.64	0.08	0.1	0.76	0.68	0.12	0.12	0.16	0.32	0.12	1.16	1.7
SWGCP_only_5000/SWlin2006.16314.cnf	0.22	0.34	0.08	0.12	0.34	0.34	0.12	0.32	0.32	0.34	0.12	0.54	0.5	0.4	0.1	0.46	0.2	0.12	0.78	1.52
SWGCP_only_5000/SWlin2006.16315.cnf	0.22	0.56	0.08	0.12	0.42	0.34	0.12	0.38	0.56	0.48	0.12	0.74	0.92	0.54	0.12	0.62	0.1	0.1	0.88	1.62
SWGCP_only_5000/SWlin2006.16316.cnf	0.24	0.52	0.08	0.1	0.4	0.38	0.1	0.36	0.36	0.4	0.12	0.58	0.82	0.44	0.06	0.54	0.24	0.1	0.54	1.44
SWGCP_only_5000/SWlin2006.16317.cnf	0.02	0.0	0.02	0.04	0.08	0.04	0.08	0.02	0.04	0.04	0.06	0.02	0.02	0.0	0.04	0.02	0.08	0.08	0.38	0.46
SWGCP_only_5000/SWlin2006.16318.cnf	0.14	0.42	0.08	0.08	0.2	0.22	0.08	0.18	0.28	0.24	0.08	0.32	0.32	0.36	0.06	0.28	0.16	0.08	0.52	0.8
SWGCP_only_5000/SWlin2006.16319.cnf	0.24	0.84	0.06	0.1	0.36	0.36	0.12	0.32	0.38	0.42	0.12	0.5	0.64	0.6	0.08	0.54	0.24	0.12	0.68	1.38
SWGCP_only_5000/SWlin2006.16320.cnf	0.24	0.14	0.1	0.1	0.4	0.36	0.08	0.4	0.5	0.48	0.12	0.12	0.7	0.56	0.1	0.56	0.32	0.1	0.52	1.56
SWGCP_only_5000/SWlin2006.16321.cnf	0.34	0.54	0.1	0.12	0.48	0.44	0.14	0.44	0.46	0.42	0.14	0.86	0.8	0.6	0.12	0.66	0.3	0.12	0.74	2.0
SWGCP_only_5000/SWlin2006.16322.cnf	0.28	0.4	0.08	0.08	0.36	0.34	0.12	0.38	0.48	0.38	0.14	0.7	0.74	0.46	0.06	0.42	0.14	0.1	0.76	1.8
SWGCP_only_5000/SWlin2006.16323.cnf	0.2	0.5	0.06	0.06	0.32	0.3	0.08	0.26	0.24	0.28	0.08	0.16	0.44	0.44	0.08	0.36	0.22	0.08	0.56	1.02
SWGCP_only_5000/SWlin2006.16324.cnf	0.24	0.86	0.12	0.12	0.44	0.44	0.1	0.42	0.48	0.5	0.12	0.62	0.86	0.44	0.1	0.64	0.34	0.12	0.92	1.98
SWGCP_only_5000/SWlin2006.16325.cnf	0.24	1.02	0.1	0.12	0.46	0.48	0.12	0.36	0.32	0.44	0.16	0.78	0.48	0.7	0.12	0.52	0.32	0.12	0.68	2.0
SWGCP_only_5000/SWlin2006.16326.cnf	0.12	0.12	0.06	0.06	0.2	0.18	0.1	0.18	0.02	0.12	0.06	0.22	0.14	0.02	0.08	0.24	0.14	0.04	0.48	0.64
SWGCP_only_5000/SWlin2006.16327.cnf	0.16	0.24	0.08	0.1	0.22	0.2	0.08	0.22	0.22	0.26	0.1	0.36	0.42	0.3	0.08	0.28	0.2	0.06	0.6	0.82
SWGCP_only_5000/SWlin2006.16328.cnf	0.28	0.28	0.1	0.12	0.52	0.36	0.12	0.42	0.42	0.5	0.12	0.76	0.76	0.56	0.1	0.48	0.28	0.12	0.74	1.82
SWGCP_only_5000/SWlin2006.16329.cnf	0.12	0.3	0.06	0.06	0.18	0.16	0.06	0.14	0.22	0.16	0.04	0.26	0.36	0.22	0.02	0.2	0.14	0.04	0.36	0.46
SWGCP_only_5000/SWlin2006.16330.cnf	0.02	0.22	0.06	0.06	0.2	0.04	0.04	0.14	0.28	0.16	0.06	0.18	0.44	0.28	0.06	0.02	0.02	0.08	0.14	0.58
SWGCP_only_5000/SWlin2006.16331.cnf	0.2	0.46	0.08	0.08	0.32	0.3	0.08	0.3	0.4	0.32	0.1	0.44	0.52	0.48	0.06	0.36	0.22	0.1	0.74	1.06
SWGCP_only_5000/SWlin2006.16332.cnf	0.22	0.12	0.08	0.1	0.36	0.08	0.12	0.34	0.52	0.4	0.12	0.66	0.74	0.54	0.08	0.52	0.26	0.12	0.7	1.38
SWGCP_only_5000/SWlin2006.16333.cnf	0.02	0.14	0.08	0.06	0.04	0.04	0.04	0.04	0.02	0.26	0.08	0.16	0.02	0.02	0.06	0.28	0.16	0.06	0.12	0.72
SWGCP_only_5000/SWlin2006.16334.cnf	0.2	0.46	0.1	0.1	0.36	0.34	0.1	0.3	0.46	0.38	0.12	0.48	0.84	0.6	0.1	0.48	0.24	0.08	1.02	1.44
SWGCP_only_5000/SWlin2006.16335.cnf	0.14	0.1	0.06	0.06	0.04	0.02	0.06	0.18	0.0	0.02	0.04	0.08	0.02	0.02	0.04	0.06	0.16	0.08	0.44	0.58
SWGCP_only_5000/SWlin2006.16336.cnf	0.2	0.46	0.08	0.1	0.36	0.34	0.1	0.3	0.48	0.38	0.12	0.6	0.82	0.56	0.12	0.42	0.26	0.1	0.72	1.36
SWGCP_only_5000/SWlin2006.16337.cnf	0.32	0.26	0.08	0.12	0.42	0.42	0.12	0.42	0.64	0.48	0.14	0.78	0.68	0.52	0.12	0.48	0.3	0.12	0.66	1.88
SWGCP_only_5000/SWlin2006.16338.cnf	0.14	0.66	0.08	0.08	0.2	0.08	0.1	0.38	0.34	0.42	0.1	0.18	0.34	0.48	0.08	0.36	0.14	0.1	0.74	1.48
SWGCP_only_5000/SWlin2006.16339.cnf	0.2	0.24	0.1	0.08	0.3	0.3	0.1	0.24	0.32	0.28	0.1	0.4	0.32	0.22	0.1	0.36	0.2	0.1	0.46	1.22
SWGCP_only_5000/SWlin2006.16340.cnf	0.06	0.08	0.06	0.06	0.04	0.04	0.08	0.22	0.1	0.04	0.1	0.04	0.06	0.12	0.06	0.02	0.16	0.08	0.02	0.8
SWGCP_only_5000/SWlin2006.16341.cnf	0.22	0.52	0.12	0.14	0.52	0.4	0.12	0.36	0.54	0.46	0.14	0.52	0.66	0.4	0.1	0.48	0.28	0.14	0.76	2.0
SWGCP_only_5000/SWlin2006.16342.cnf	0.18	0.52	0.08	0.08	0.26	0.26	0.08	0.24	0.36	0.3	0.08	0.38	0.62	0.36	0.08	0.34	0.2	0.1	0.62	0.9
SWGCP_only_5000/SWlin2006.16343.cnf	0.18	0.24	0.08	0.08	0.36	0.34	0.12	0.32	0.22	0.36	0.12	0.52	0.3	0.26	0.08	0.4	0.2	0.1	0.56	1.28
SWGCP_only_5000/SWlin2006.16344.cnf	0.18	0.26	0.06	0.1	0.34	0.3	0.12	0.32	0.3	0.34	0.12	0.48	0.3	0.24	0.08	0.38	0.18	0.1	0.7	1.5
SWGCP_only_5000/SWlin2006.16345.cnf	0.22	0.04	0.1	0.1	0.38	0.38	0.12	0.34	0.52	0.38	0.12	0.62	0.88	0.18	0.08	0.5	0.08	0.12	0.82	1.44
SWGCP_only_5000/SWlin2006.16346.cnf	0.14	0.32	0.08	0.08	0.3	0.34	0.1	0.24	0.34	0.38	0.1	0.56	0.56	0.42	0.08	0.42	0.26	0.1	0.66	1.2
SWGCP_only_5000/SWlin2006.16347.cnf	0.18	0.0	0.06	0.06	0.26	0.22	0.08	0.12	0.0	0.14	0.08	0.16	0.12	0.02	0.08	0.16	0.16	0.08	0.6	0.84
SWGCP_only_5000/SWlin2006.16348.cnf	0.22	0.18	0.1	0.1	0.34	0.34	0.1	0.3	0.32	0.08	0.12	0.44	0.84	0.4	0.08	0.5	0.18	0.1	0.9	1.34
SWGCP_only_5000/SWlin2006.16349.cnf	0.14	0.16	0.06	0.06	0.22	0.2	0.08	0.18	0.2	0.2	0.06	0.28	0.22	0.2	0.06	0.26	0.14	0.08	0.44	0.76
SWGCP_only_5000/SWlin2006.16350.cnf	0.16	0.5	0.08	0.06	0.32	0.32	0.1	0.08	0.2	0.22	0.1	0.46	0.58	0.48	0.08	0.38	0.26	0.1	0.68	1.14
SWGCP_only_5000/SWlin2006.16351.cnf	0.16	0.06	0.08	0.08	0.14	0.26	0.1	0.22	0.24	0.28	0.08	0.42	0.42	0.2	0.06	0.34	0.22	0.06	0.12	0.84
SWGCP_only_5000/SWlin2006.16352.cnf	0.12	0.36	0.06	0.08	0.18	0.18	0.08	0.18	0.24	0.2	0.08	0.28	0.36	0.28	0.08	0.24	0.14	0.06	0.42	0.58
SWGCP_only_5000/SWlin2006.16353.cnf	0.26	0.6	0.08	0.12	0.48	0.4	0.12	0.34	0.5	0.44	0.12	0.58	0.86	0.82	0.14	0.6	0.26	0.12	0.82	1.9
SWGCP_only_5000/SWlin2006.16354.cnf	0.22	0.52	0.08	0.04	0.34	0.34	0.08	0.3	0.48	0.22	0.12	0.04	0.68	0.56	0.1	0.44	0.26	0.1	0.76	1.26
SWGCP_only_5000/SWlin2006.16355.cnf	0.24	0.6	0.1	0.12	0.44	0.38	0.1	0.34	0.34	0.46	0.12	0.54	0.9	0.62	0.1	0.46	0.24	0.1	0.96	1.64
SWGCP_only_5000/SWlin2006.16356.cnf	0.2	0.48	0.08	0.08	0.36	0.32	0.1	0.26	0.12	0.38	0.08	0.6	0.8	0.56	0.08	0.04	0.08	0.1	0.8	1.2
SWGCP_only_5000/SWlin2006.16357.cnf	0.24	0.7	0.08	0.08	0.28	0.38	0.1	0.08	0.32	0.28	0.14	0.6	0.3	0.54	0.1	0.44	0.26	0.08	0.76	1.32
SWGCP_only_5000/SWlin2006.16358.cnf	0.18	0.52	0.06	0.06	0.26	0.28	0.08	0.26	0.42	0.18	0.1	0.5	0.56	0.38	0.08	0.36	0.22	0.1	0.6	1.02
SWGCP_only_5000/SWlin2006.16359.cnf	0.16	0.04	0.06	0.08	0.28	0.26	0.1	0.2	0.26	0.26	0.08	0.04	0.06	0.06	0.06	0.3	0.08	0.08	0.44	0.82
SWGCP_only_5000/SWlin2006.16360.cnf	0.16	0.76	0.1	0.1	0.4	0.36	0.1	0.4	0.16	0.42	0.12	0.62	0.64	0.58	0.1	0.38	0.26	0.12	0.12	1.52
SWGCP_only_5000/SWlin2006.16361.cnf	0.1	0.3	0.04	0.04	0.14	0.16	0.04	0.12	0.18	0.14	0.06	0.24	0.34	0.24	0.06	0.2	0.14	0.06	0.34	0.44
SWGCP_only_5000/SWlin2006.16362.cnf	0.2	0.58	0.08	0.08	0.3	0.26	0.08	0.28	0.42	0.26	0.1	0.44	0.5	0.38	0.08	0.4	0.22	0.08	0.54	0.96
SWGCP_only_5000/SWlin2006.16363.cnf	0.12	0.34	0.06	0.06	0.2	0.16	0.06	0.18	0.2	0.2	0.08	0.3	0.44	0.3	0.04	0.22	0.14	0.08	0.36	0.56
SWGCP_only_5000/SWlin2006.16364.cnf	0.18	0.68	0.08	0.1	0.36	0.34	0.1	0.36	0.4	0.36	0.12	0.5	0.64	0.54	0.1	0.52	0.26	0.1	0.68	1.46
SWGCP_only_5000/SWlin2006.16365.cnf	0.28	0.68	0.1	0.12	0.44	0.34	0.12	0.28	0.36	0.44	0.12	0.76	0.92	0.52	0.1	0.56	0.28	0.12	0.94	1.76
SWGCP_only_5000/SWlin2006.16366.cnf	0.1	0.3	0.04	0.04	0.16	0.16	0.06	0.16	0.22	0.18	0.08	0.26	0.34	0.22	0.04	0.2	0.14	0.06	0.32	0.46
SWGCP_only_5000/SWlin2006.16367.cnf	0.16	0.36	0.06	0.06	0.28	0.26	0.08	0.24	0.32	0.28	0.1	0.34	0.58	0.3	0.08	0.3	0.2	0.08	0.58	0.78
SWGCP_only_5000/SWlin2006.16368.cnf	0.2	0.6	0.06	0.06	0.32	0.32	0.1	0.28	0.48	0.34	0.1	0.52	0.76	0.46	0.1	0.42	0.24	0.1	0.76	1.08
SWGCP_only_5000/SWlin2006.16369.cnf	0.24	0.36	0.06	0.1	0.36	0.34	0.12	0.28	0.38	0.34	0.1	0.52	0.5	0.46	0.08	0.48	0.28	0.08	0.9	1.28
SWGCP_only_5000/SWlin2006.16370.cnf	0.3	0.52	0.1	0.1	0.4	0.38	0.14	0.34	0.4	0.44	0.12	0.64	0.78	0.42	0.1	0.44	0.28	0.12	0.68	1.88
SWGCP_only_5000/SWlin2006.16371.cnf	0.26	0.72	0.1	0.12	0.46	0.44	0.12	0.44	0.68	0.1	0.12	0.66	1.14	0.42	0.12	0.56	0.26	0.12	0.9	1.92
SWGCP_only_5000/SWlin2006.16372.cnf	0.24	0.32	0.1	0.08	0.34	0.38	0.1	0.24	0.28	0.28	0.1	0.34	0.38	0.42	0.08	0.36	0.22	0.12	0.6	1.52
SWGCP_only_5000/SWlin2006.16373.cnf	0.24	0.7	0.08	0.1	0.38	0.32	0.1	0.34	0.34	0.42	0.12	0.56	0.42	0.54	0.08	0.4	0.26	0.1	0.74	1.34
SWGCP_only_5000/SWlin2006.16374.cnf	0.16	0.26	0.06	0.04	0.26	0.28	0.08	0.26	0.26	0.3	0.08	0.32	0.52	0.26	0.08	0.38	0.18	0.08	0.64	0.98
SWGCP_only_5000/SWlin2006.16375.cnf	0.14	0.38	0.08	0.06	0.2	0.2	0.06	0.2	0.26	0.2	0.08	0.34	0.38	0.3	0.08	0.26	0.16	0.06	0.48	0.62
SWGCP_only_5000/SWlin2006.16376.cnf	0.18	0.44	0.08	0.08	0.36	0.3	0.1	0.28	0.3	0.38	0.12	0.08	0.74	0.48	0.08	0.44	0.26	0.1	0.64	1.3
SWGCP_only_5000/SWlin2006.16377.cnf	0.2	0.24	0.08	0.08	0.36	0.36	0.14	0.34	0.26	0.4	0.12	0.58	0.32	0.3	0.1	0.46	0.2	0.12	0.7	1.82
SWGCP_only_5000/SWlin2006.16378.cnf	0.02	0.28	0.06	0.06	0.02	0.18	0.08	0.14	0.0	0.18	0.06	0.0	0.0	0.0	0.04	0.2	0.04	0.06	0.28	0.46
SWGCP_only_5000/SWlin2006.16379.cnf	0.16	0.46	0.08	0.04	0.24	0.22	0.08	0.22	0.3	0.26	0.1	0.36	0.5	0.32	0.06	0.32	0.18	0.04	0.54	0.74
SWGCP_only_5000/SWlin2006.16380.cnf	0.22	0.64	0.08	0.1	0.4	0.22	0.1	0.16	0.04	0.42	0.1	0.12	0.88	0.5	0.1	0.42	0.12	0.1	0.92	1.28
SWGCP_only_5000/SWlin2006.16381.cnf	0.18	0.42	0.08	0.08	0.32	0.3	0.08	0.26	0.28	0.32	0.1	0.46	0.52	0.36	0.08	0.34	0.18	0.1	0.66	1.08
SWGCP_only_5000/SWlin2006.16382.cnf	0.26	0.6	0.08	0.1	0.26	0.46	0.14	0.34	0.6	0.46	0.12	0.74	0.88	0.56	0.12	0.56	0.3	0.12	1.04	1.74
SWGCP_only_5000/SWlin2006.16383.cnf	0.14	0.42	0.06	0.06	0.22	0.2	0.08	0.18	0.28	0.24	0.08	0.36	0.5	0.36	0.06	0.3	0.18	0.08	0.5	0.68
SWGCP_only_5000/SWlin2006.16384.cnf	0.24	0.92	0.08	0.1	0.44	0.4	0.12	0.4	0.5	0.42	0.12	0.3	0.78	0.54	0.12	0.52	0.26	0.1	1.14	1.72
SWGCP_only_5000/SWlin2006.16385.cnf	0.12	0.24	0.04	0.06	0.2	0.18	0.08	0.18	0.2	0.18	0.06	0.28	0.28	0.24	0.06	0.24	0.16	0.08	0.4	0.66
SWGCP_only_5000/SWlin2006.16386.cnf	0.18	0.42	0.08	0.08	0.12	0.34	0.1	0.2	0.5	0.32	0.1	0.52	0.28	0.06	0.1	0.44	0.1	0.12	0.7	1.24
SWGCP_only_5000/SWlin2006.16387.cnf	0.14	0.38	0.04	0.04	0.22	0.22	0.06	0.18	0.24	0.22	0.08	0.26	0.48	0.22	0.04	0.26	0.14	0.08	0.44	0.62
SWGCP_only_5000/SWlin2006.16388.cnf	0.12	0.74	0.08	0.1	0.32	0.36	0.08	0.32	0.52	0.34	0.1	0.2	0.82	0.54	0.1	0.36	0.14	0.1	0.78	1.34
SWGCP_only_5000/SWlin2006.16389.cnf	0.18	0.38	0.08	0.08	0.06	0.22	0.06	0.08	0.04	0.06	0.08	0.2	0.04	0.02	0.06	0.02	0.12	0.06	0.56	0.76
SWGCP_only_5000/SWlin2006.16390.cnf	0.2	0.24	0.1	0.12	0.34	0.32	0.1	0.32	0.48	0.3	0.12	0.58	0.82	0.4	0.1	0.4	0.24	0.12	0.9	1.34
SWGCP_only_5000/SWlin2006.16391.cnf	0.26	0.32	0.12	0.1	0.38	0.36	0.14	0.32	0.36	0.34	0.12	0.52	0.38	0.34	0.12	0.38	0.22	0.12	0.9	1.68
SWGCP_only_5000/SWlin2006.16392.cnf	0.06	0.44	0.06	0.08	0.34	0.08	0.1	0.02	0.06	0.32	0.08	0.48	0.2	0.14	0.04	0.42	0.06	0.1	0.56	0.98
SWGCP_only_5000/SWlin2006.16393.cnf	0.3	0.64	0.08	0.1	0.32	0.38	0.1	0.36	0.36	0.46	0.14	0.58	0.72	0.44	0.1	0.52	0.26	0.12	0.88	1.68
SWGCP_only_5000/SWlin2006.16394.cnf	0.22	0.42	0.1	0.12	0.36	0.38	0.14	0.34	0.34	0.34	0.12	0.42	0.72	0.38	0.1	0.48	0.32	0.1	0.7	1.8
SWGCP_only_5000/SWlin2006.16395.cnf	0.2	0.36	0.06	0.08	0.26	0.24	0.12	0.26	0.32	0.26	0.1	0.46	0.46	0.34	0.08	0.38	0.18	0.08	0.62	1.06
SWGCP_only_5000/SWlin2006.16396.cnf	0.22	0.38	0.1	0.1	0.38	0.32	0.12	0.34	0.34	0.42	0.12	0.52	0.56	0.42	0.12	0.42	0.28	0.1	0.82	1.7
SWGCP_only_5000/SWlin2006.16397.cnf	0.18	0.2	0.08	0.1	0.28	0.28	0.1	0.24	0.28	0.32	0.1	0.36	0.26	0.24	0.08	0.36	0.16	0.08	0.46	1.02
SWGCP_only_5000/SWlin2006.16398.cnf	0.16	0.7	0.1	0.12	0.44	0.24	0.14	0.42	0.42	0.48	0.12	0.74	1.26	0.56	0.1	0.58	0.3	0.12	0.82	1.8
SWGCP_only_5000/SWlin2006.16399.cnf	0.28	0.64	0.1	0.12	0.24	0.44	0.12	0.4	0.68	0.24	0.16	0.76	0.28	0.18	0.1	0.58	0.3	0.12	0.68	1.84
SWGCP_only_5000/SWlin2006.16400.cnf	0.14	0.06	0.06	0.06	0.18	0.16	0.06	0.02	0.0	0.14	0.08	0.28	0.26	0.22	0.06	0.26	0.08	0.06	0.06	0.54
SWGCP_only_5000/SWlin2006.16401.cnf	0.18	0.2	0.08	0.08	0.24	0.26	0.08	0.22	0.22	0.3	0.08	0.34	0.26	0.22	0.08	0.34	0.16	0.1	0.52	1.02
SWGCP_only_5000/SWlin2006.16402.cnf	0.24	0.46	0.08	0.1	0.36	0.34	0.08	0.28	0.34	0.32	0.1	0.56	0.64	0.38	0.08	0.44	0.24	0.1	0.76	1.34
SWGCP_only_5000/SWlin2006.16403.cnf	0.18	0.46	0.08	0.06	0.12	0.26	0.08	0.24	0.34	0.28	0.1	0.28	0.42	0.4	0.06	0.22	0.18	0.08	0.48	0.88
SWGCP_only_5000/SWlin2006.16404.cnf	0.16	0.42	0.06	0.06	0.24	0.24	0.08	0.2	0.3	0.26	0.1	0.4	0.52	0.4	0.06	0.32	0.2	0.08	0.42	0.76
SWGCP_only_5000/SWlin2006.16405.cnf	0.26	0.38	0.1	0.14	0.38	0.36	0.12	0.32	0.36	0.34	0.12	0.48	0.68	0.36	0.1	0.44	0.22	0.1	0.86	1.64
SWGCP_only_5000/SWlin2006.16406.cnf	0.18	0.36	0.08	0.08	0.32	0.32	0.1	0.28	0.3	0.3	0.1	0.44	0.44	0.34	0.1	0.36	0.2	0.1	0.48	1.18
SWGCP_only_5000/SWlin2006.16407.cnf	0.2	0.8	0.08	0.1	0.36	0.38	0.12	0.34	0.44	0.44	0.1	0.62	0.88	0.24	0.08	0.54	0.28	0.1	0.9	1.42
SWGCP_only_5000/SWlin2006.16408.cnf	0.22	0.06	0.06	0.08	0.32	0.34	0.08	0.08	0.34	0.34	0.08	0.48	0.12	0.5	0.08	0.32	0.04	0.08	0.5	1.08
SWGCP_only_5000/SWlin2006.16409.cnf	0.22	0.74	0.08	0.08	0.36	0.32	0.12	0.3	0.46	0.36	0.12	0.5	0.58	0.44	0.08	0.44	0.22	0.12	0.74	1.3
SWGCP_only_5000/SWlin2006.16410.cnf	0.18	0.28	0.06	0.08	0.08	0.12	0.08	0.04	0.2	0.18	0.1	0.4	0.12	0.04	0.08	0.32	0.2	0.08	0.1	0.78
SWGCP_only_5000/SWlin2006.16411.cnf	0.18	0.56	0.08	0.1	0.24	0.46	0.12	0.38	0.6	0.42	0.1	0.78	0.88	0.52	0.1	0.6	0.3	0.12	0.78	1.84
SWGCP_only_5000/SWlin2006.16412.cnf	0.24	0.78	0.12	0.12	0.4	0.42	0.12	0.4	0.6	0.4	0.12	0.5	0.94	0.5	0.1	0.64	0.32	0.12	0.8	1.7
SWGCP_only_5000/SWlin2006.16413.cnf	0.34	0.54	0.1	0.1	0.44	0.36	0.14	0.36	0.66	0.42	0.12	0.76	0.98	0.7	0.1	0.16	0.26	0.12	0.64	1.96
SWGCP_only_5000/SWlin2006.16414.cnf	0.04	0.36	0.08	0.08	0.12	0.04	0.06	0.24	0.3	0.14	0.08	0.12	0.04	0.34	0.08	0.34	0.2	0.1	0.1	0.84
SWGCP_only_5000/SWlin2006.16415.cnf	0.06	0.02	0.08	0.06	0.06	0.22	0.08	0.2	0.26	0.06	0.08	0.04	0.02	0.02	0.06	0.14	0.16	0.08	0.5	0.64
SWGCP_only_5000/SWlin2006.16416.cnf	0.14	0.22	0.06	0.06	0.22	0.18	0.06	0.2	0.2	0.2	0.08	0.24	0.32	0.22	0.06	0.28	0.16	0.06	0.4	0.76
SWGCP_only_5000/SWlin2006.16417.cnf	0.24	0.6	0.08	0.1	0.34	0.3	0.1	0.34	0.28	0.38	0.1	0.14	0.84	0.1	0.1	0.38	0.14	0.1	0.82	1.22
SWGCP_only_5000/SWlin2006.16418.cnf	0.12	0.26	0.04	0.08	0.22	0.18	0.06	0.2	0.24	0.22	0.08	0.32	0.42	0.28	0.08	0.26	0.16	0.08	0.44	0.74
SWGCP_only_5000/SWlin2006.16419.cnf	0.12	0.3	0.06	0.04	0.16	0.16	0.06	0.12	0.18	0.16	0.06	0.22	0.36	0.22	0.06	0.2	0.12	0.08	0.34	0.44
SWGCP_only_5000/SWlin2006.16420.cnf	0.14	0.28	0.06	0.04	0.18	0.18	0.06	0.12	0.22	0.16	0.08	0.28	0.32	0.22	0.06	0.18	0.12	0.06	0.36	0.5
SWGCP_only_5000/SWlin2006.16421.cnf	0.1	0.66	0.08	0.1	0.3	0.32	0.08	0.28	0.5	0.38	0.1	0.2	0.7	0.56	0.08	0.42	0.26	0.1	0.22	1.2
SWGCP_only_5000/SWlin2006.16422.cnf	0.2	0.7	0.08	0.1	0.34	0.14	0.12	0.32	0.06	0.4	0.12	0.48	0.54	0.44	0.1	0.42	0.28	0.1	0.88	1.28
SWGCP_only_5000/SWlin2006.16423.cnf	0.24	0.68	0.1	0.12	0.34	0.38	0.12	0.36	0.42	0.4	0.12	0.7	1.04	0.46	0.1	0.46	0.22	0.12	0.9	1.64
SWGCP_only_5000/SWlin2006.16424.cnf	0.14	0.4	0.04	0.08	0.2	0.2	0.06	0.16	0.26	0.2	0.08	0.32	0.46	0.32	0.06	0.24	0.16	0.06	0.44	0.56
SWGCP_only_5000/SWlin2006.16425.cnf	0.12	0.22	0.04	0.06	0.16	0.18	0.08	0.16	0.22	0.18	0.08	0.28	0.3	0.2	0.06	0.24	0.12	0.08	0.38	0.54
SWGCP_only_5000/SWlin2006.16426.cnf	0.22	0.72	0.06	0.1	0.36	0.34	0.1	0.34	0.46	0.18	0.12	0.6	0.68	0.42	0.1	0.4	0.24	0.12	0.72	1.32
SWGCP_only_5000/SWlin2006.16427.cnf	0.12	0.32	0.06	0.06	0.2	0.18	0.06	0.14	0.22	0.2	0.08	0.28	0.34	0.26	0.06	0.22	0.16	0.06	0.4	0.52
SWGCP_only_5000/SWlin2006.16428.cnf	0.18	0.5	0.06	0.06	0.26	0.24	0.06	0.26	0.24	0.26	0.06	0.4	0.6	0.36	0.06	0.34	0.22	0.1	0.64	0.86
SWGCP_only_5000/SWlin2006.16429.cnf	0.28	0.1	0.1	0.14	0.38	0.42	0.12	0.4	0.1	0.48	0.12	0.68	0.82	0.62	0.08	0.64	0.32	0.12	0.96	1.74
SWGCP_only_5000/SWlin2006.16430.cnf	0.22	0.38	0.1	0.12	0.42	0.38	0.12	0.38	0.32	0.4	0.14	0.5	0.66	0.42	0.12	0.58	0.28	0.1	0.98	1.74
SWGCP_only_5000/SWlin2006.16431.cnf	0.22	0.4	0.08	0.1	0.4	0.38	0.12	0.32	0.46	0.38	0.14	0.62	0.66	0.48	0.12	0.52	0.28	0.1	0.82	1.66
SWGCP_only_5000/SWlin2006.16432.cnf	0.12	0.02	0.06	0.06	0.1	0.02	0.06	0.18	0.02	0.08	0.06	0.0	0.02	0.02	0.06	0.02	0.16	0.06	0.04	0.56
SWGCP_only_5000/SWlin2006.16433.cnf	0.26	0.78	0.1	0.12	0.42	0.36	0.14	0.34	0.24	0.46	0.12	0.8	1.08	0.54	0.1	0.52	0.32	0.1	0.72	1.88
SWGCP_only_5000/SWlin2006.16434.cnf	0.28	0.76	0.08	0.1	0.36	0.48	0.12	0.34	0.62	0.4	0.14	0.72	0.98	0.5	0.1	0.54	0.3	0.12	0.8	1.66
SWGCP_only_5000/SWlin2006.16435.cnf	0.16	0.22	0.08	0.08	0.28	0.28	0.1	0.24	0.24	0.32	0.1	0.42	0.28	0.24	0.08	0.3	0.16	0.08	0.56	1.16
SWGCP_only_5000/SWlin2006.16436.cnf	0.24	0.58	0.1	0.12	0.48	0.38	0.14	0.42	0.34	0.44	0.14	0.66	0.54	0.5	0.14	0.54	0.32	0.14	0.94	1.96
SWGCP_only_5000/SWlin2006.16437.cnf	0.12	0.76	0.1	0.1	0.28	0.4	0.12	0.38	0.36	0.4	0.1	0.68	0.88	0.08	0.12	0.18	0.26	0.12	0.94	1.52
SWGCP_only_5000/SWlin2006.16438.cnf	0.26	0.88	0.1	0.12	0.46	0.46	0.12	0.36	0.38	0.4	0.14	0.62	0.78	0.56	0.12	0.62	0.36	0.12	0.68	1.94
SWGCP_only_5000/SWlin2006.16439.cnf	0.12	0.04	0.06	0.08	0.24	0.24	0.08	0.24	0.06	0.04	0.1	0.04	0.58	0.04	0.08	0.36	0.2	0.06	0.18	0.82
SWGCP_only_5000/SWlin2006.16440.cnf	0.24	0.5	0.1	0.1	0.34	0.38	0.12	0.34	0.36	0.46	0.1	0.54	0.44	0.46	0.12	0.48	0.26	0.12	0.68	1.7
SWGCP_only_5000/SWlin2006.16441.cnf	0.24	0.22	0.08	0.1	0.3	0.34	0.1	0.32	0.26	0.36	0.12	0.68	0.98	0.18	0.1	0.52	0.28	0.08	0.6	1.46
SWGCP_only_5000/SWlin2006.16442.cnf	0.12	0.22	0.06	0.06	0.16	0.14	0.06	0.16	0.18	0.16	0.06	0.22	0.26	0.18	0.06	0.2	0.14	0.06	0.3	0.44
SWGCP_only_5000/SWlin2006.16443.cnf	0.22	0.46	0.1	0.12	0.44	0.44	0.12	0.36	0.56	0.42	0.14	0.6	0.54	0.38	0.1	0.46	0.28	0.12	0.66	1.8
SWGCP_only_5000/SWlin2006.16444.cnf	0.3	0.18	0.12	0.12	0.46	0.48	0.12	0.44	0.64	0.5	0.14	0.66	0.6	0.5	0.1	0.52	0.28	0.1	0.98	2.0
SWGCP_only_5000/SWlin2006.16445.cnf	0.0	0.0	0.04	0.06	0.0	0.14	0.0	0.02	0.0	0.16	0.06	0.06	0.0	0.0	0.04	0.02	0.12	0.06	0.0	0.46
SWGCP_only_5000/SWlin2006.16446.cnf	0.2	0.64	0.08	0.08	0.32	0.28	0.1	0.3	0.14	0.34	0.08	0.1	0.82	0.48	0.1	0.4	0.2	0.1	0.74	1.1
SWGCP_only_5000/SWlin2006.16447.cnf	0.22	0.46	0.08	0.1	0.46	0.44	0.14	0.34	0.48	0.38	0.14	0.54	0.72	0.66	0.1	0.36	0.28	0.12	0.68	1.72
SWGCP_only_5000/SWlin2006.16448.cnf	0.24	0.1	0.08	0.1	0.38	0.34	0.12	0.34	0.22	0.32	0.12	0.64	0.88	0.1	0.08	0.38	0.26	0.1	0.7	1.34
SWGCP_only_5000/SWlin2006.16449.cnf	0.26	0.4	0.08	0.08	0.36	0.32	0.1	0.32	0.08	0.34	0.12	0.14	0.66	0.52	0.12	0.56	0.2	0.12	0.94	1.54
SWGCP_only_5000/SWlin2006.16450.cnf	0.24	0.86	0.1	0.08	0.46	0.36	0.12	0.42	0.46	0.36	0.12	0.74	0.2	0.58	0.1	0.46	0.28	0.1	1.14	1.74
SWGCP_only_5000/SWlin2006.16451.cnf	0.18	0.46	0.08	0.04	0.04	0.26	0.08	0.2	0.04	0.14	0.1	0.4	0.04	0.02	0.08	0.36	0.2	0.08	0.22	0.8
SWGCP_only_5000/SWlin2006.16452.cnf	0.2	0.58	0.16	0.14	0.46	0.44	0.14	0.36	0.66	0.38	0.14	0.74	1.06	0.46	0.12	0.5	0.24	0.12	1.2	2.0
SWGCP_only_5000/SWlin2006.16453.cnf	0.04	0.06	0.06	0.04	0.24	0.22	0.06	0.04	0.04	0.26	0.08	0.02	0.52	0.04	0.08	0.32	0.04	0.08	0.02	0.74
SWGCP_only_5000/SWlin2006.16454.cnf	0.26	0.34	0.12	0.12	0.44	0.34	0.14	0.34	0.38	0.42	0.12	0.6	1.04	0.42	0.1	0.6	0.32	0.12	0.7	1.76
SWGCP_only_5000/SWlin2006.16455.cnf	0.12	0.26	0.06	0.06	0.18	0.2	0.08	0.16	0.24	0.24	0.08	0.34	0.44	0.3	0.08	0.26	0.16	0.06	0.48	0.7
SWGCP_only_5000/SWlin2006.16456.cnf	0.26	0.58	0.1	0.1	0.4	0.42	0.12	0.38	0.32	0.36	0.12	0.48	0.68	0.54	0.1	0.36	0.3	0.1	0.74	1.54
SWGCP_only_5000/SWlin2006.16457.cnf	0.16	0.02	0.08	0.08	0.14	0.3	0.08	0.26	0.42	0.34	0.1	0.46	0.12	0.06	0.06	0.16	0.16	0.08	0.64	1.0
SWGCP_only_5000/SWlin2006.16458.cnf	0.22	0.4	0.1	0.1	0.4	0.38	0.1	0.3	0.5	0.44	0.12	0.48	0.66	0.38	0.1	0.5	0.26	0.08	0.62	1.5
SWGCP_only_5000/SWlin2006.16459.cnf	0.24	0.74	0.1	0.1	0.4	0.1	0.1	0.3	0.44	0.34	0.12	0.58	0.66	0.36	0.1	0.4	0.26	0.1	0.78	1.5
SWGCP_only_5000/SWlin2006.16460.cnf	0.16	0.32	0.06	0.06	0.26	0.26	0.08	0.26	0.24	0.28	0.1	0.4	0.38	0.34	0.08	0.3	0.22	0.1	0.58	1.0
SWGCP_only_5000/SWlin2006.16461.cnf	0.0	0.02	0.04	0.04	0.0	0.02	0.04	0.04	0.02	0.02	0.08	0.02	0.02	0.0	0.04	0.02	0.0	0.06	0.02	0.46
SWGCP_only_5000/SWlin2006.16462.cnf	0.14	0.22	0.06	0.08	0.26	0.24	0.08	0.22	0.24	0.22	0.1	0.34	0.3	0.24	0.08	0.3	0.16	0.08	0.48	0.84
SWGCP_only_5000/SWlin2006.16463.cnf	0.3	0.88	0.1	0.1	0.44	0.48	0.12	0.34	0.54	0.44	0.14	0.58	0.52	0.34	0.12	0.52	0.32	0.12	1.04	1.78
SWGCP_only_5000/SWlin2006.16464.cnf	0.2	0.64	0.08	0.1	0.34	0.34	0.1	0.26	0.4	0.38	0.1	0.36	0.04	0.54	0.08	0.46	0.26	0.12	0.74	1.16
SWGCP_only_5000/SWlin2006.16465.cnf	0.14	0.24	0.04	0.06	0.18	0.14	0.08	0.18	0.18	0.18	0.06	0.22	0.26	0.22	0.08	0.18	0.12	0.08	0.34	0.54
SWGCP_only_5000/SWlin2006.16466.cnf	0.24	0.4	0.1	0.1	0.08	0.38	0.1	0.32	0.3	0.12	0.12	0.5	0.1	0.56	0.08	0.44	0.26	0.1	0.8	1.36
SWGCP_only_5000/SWlin2006.16467.cnf	0.24	0.48	0.08	0.12	0.2	0.2	0.12	0.36	0.48	0.38	0.12	0.52	0.2	0.52	0.08	0.52	0.26	0.12	0.74	1.34
SWGCP_only_5000/SWlin2006.16468.cnf	0.16	0.92	0.1	0.1	0.46	0.36	0.14	0.32	0.16	0.46	0.14	0.66	0.94	0.06	0.12	0.58	0.32	0.12	0.76	1.76
SWGCP_only_5000/SWlin2006.16469.cnf	0.24	0.48	0.08	0.1	0.36	0.42	0.12	0.32	0.44	0.38	0.12	0.54	0.34	0.56	0.12	0.52	0.24	0.1	0.9	1.58
SWGCP_only_5000/SWlin2006.16470.cnf	0.12	0.24	0.04	0.06	0.04	0.02	0.04	0.08	0.0	0.06	0.08	0.04	0.48	0.04	0.06	0.02	0.04	0.06	0.5	0.64
SWGCP_only_5000/SWlin2006.16471.cnf	0.1	0.18	0.06	0.04	0.16	0.14	0.06	0.12	0.12	0.12	0.06	0.2	0.2	0.16	0.04	0.16	0.1	0.06	0.3	0.42
SWGCP_only_5000/SWlin2006.16472.cnf	0.26	0.44	0.1	0.12	0.42	0.42	0.12	0.38	0.42	0.4	0.16	0.68	0.62	0.62	0.14	0.46	0.3	0.12	0.76	2.0
SWGCP_only_5000/SWlin2006.16473.cnf	0.14	0.44	0.06	0.08	0.32	0.26	0.1	0.2	0.34	0.3	0.1	0.44	0.34	0.36	0.1	0.32	0.22	0.06	0.58	0.98
SWGCP_only_5000/SWlin2006.16474.cnf	0.18	0.56	0.06	0.06	0.28	0.32	0.1	0.28	0.36	0.3	0.1	0.36	0.64	0.4	0.08	0.36	0.22	0.08	0.66	1.04
SWGCP_only_5000/SWlin2006.16475.cnf	0.26	0.62	0.08	0.1	0.32	0.34	0.1	0.32	0.54	0.42	0.12	0.46	0.46	0.16	0.08	0.48	0.28	0.12	0.68	1.56
SWGCP_only_5000/SWlin2006.16476.cnf	0.24	0.18	0.08	0.12	0.36	0.4	0.12	0.36	0.14	0.4	0.12	0.68	0.82	0.12	0.1	0.46	0.24	0.12	0.8	1.54
SWGCP_only_5000/SWlin2006.16477.cnf	0.12	0.3	0.06	0.06	0.18	0.16	0.06	0.16	0.22	0.18	0.04	0.26	0.38	0.24	0.06	0.22	0.12	0.08	0.36	0.48
SWGCP_only_5000/SWlin2006.16478.cnf	0.16	0.36	0.06	0.06	0.24	0.22	0.08	0.2	0.28	0.22	0.08	0.32	0.52	0.26	0.08	0.32	0.18	0.06	0.52	0.76
SWGCP_only_5000/SWlin2006.16479.cnf	0.18	0.26	0.08	0.08	0.26	0.22	0.08	0.22	0.28	0.22	0.08	0.32	0.32	0.32	0.06	0.3	0.16	0.1	0.5	0.86
SWGCP_only_5000/SWlin2006.16480.cnf	0.26	0.76	0.08	0.08	0.38	0.34	0.08	0.36	0.34	0.4	0.12	0.56	0.76	0.48	0.1	0.46	0.28	0.12	0.6	1.4
SWGCP_only_5000/SWlin2006.16481.cnf	0.24	0.82	0.12	0.1	0.44	0.36	0.12	0.32	0.46	0.38	0.12	0.6	0.82	0.52	0.1	0.5	0.26	0.1	0.76	1.78
SWGCP_only_5000/SWlin2006.16482.cnf	0.1	0.46	0.08	0.06	0.26	0.12	0.08	0.24	0.4	0.3	0.08	0.34	0.44	0.04	0.06	0.38	0.06	0.08	0.04	0.86
SWGCP_only_5000/SWlin2006.16483.cnf	0.22	0.72	0.08	0.08	0.34	0.28	0.1	0.32	0.28	0.4	0.12	0.6	0.56	0.12	0.08	0.42	0.24	0.1	0.84	1.3
SWGCP_only_5000/SWlin2006.16484.cnf	0.2	0.16	0.08	0.1	0.36	0.32	0.08	0.3	0.32	0.08	0.1	0.46	0.52	0.44	0.1	0.48	0.24	0.1	0.28	1.2
SWGCP_only_5000/SWlin2006.16485.cnf	0.22	0.5	0.08	0.1	0.34	0.36	0.1	0.32	0.42	0.3	0.14	0.4	0.6	0.34	0.1	0.4	0.22	0.08	0.76	1.28
SWGCP_only_5000/SWlin2006.16486.cnf	0.3	0.66	0.1	0.1	0.38	0.46	0.1	0.36	0.44	0.4	0.14	0.86	1.14	0.42	0.12	0.58	0.3	0.1	1.02	1.84
SWGCP_only_5000/SWlin2006.16487.cnf	0.12	0.1	0.08	0.08	0.02	0.1	0.08	0.28	0.32	0.08	0.1	0.5	0.12	0.22	0.08	0.08	0.18	0.1	0.74	1.08
SWGCP_only_5000/SWlin2006.16488.cnf	0.22	0.78	0.1	0.12	0.44	0.42	0.14	0.34	0.46	0.42	0.16	0.66	0.72	0.48	0.12	0.56	0.3	0.1	1.18	1.96
SWGCP_only_5000/SWlin2006.16489.cnf	0.26	0.62	0.1	0.12	0.46	0.42	0.12	0.44	0.44	0.46	0.12	0.24	1.12	0.66	0.1	0.6	0.32	0.12	0.92	1.84
SWGCP_only_5000/SWlin2006.16490.cnf	0.28	0.64	0.1	0.12	0.44	0.38	0.1	0.38	0.26	0.58	0.14	0.76	1.1	0.22	0.12	0.6	0.34	0.12	1.06	1.86
SWGCP_only_5000/SWlin2006.16491.cnf	0.18	0.18	0.06	0.06	0.26	0.26	0.1	0.28	0.34	0.3	0.1	0.44	0.02	0.02	0.06	0.36	0.22	0.08	0.12	0.88
SWGCP_only_5000/SWlin2006.16492.cnf	0.22	0.7	0.1	0.1	0.4	0.36	0.1	0.3	0.52	0.44	0.12	0.54	0.86	0.36	0.08	0.48	0.28	0.1	0.9	1.5
SWGCP_only_5000/SWlin2006.16493.cnf	0.12	0.32	0.06	0.04	0.2	0.16	0.06	0.16	0.2	0.2	0.08	0.3	0.38	0.26	0.06	0.24	0.14	0.06	0.42	0.56
SWGCP_only_5000/SWlin2006.16494.cnf	0.2	0.58	0.1	0.1	0.36	0.3	0.1	0.26	0.36	0.34	0.1	0.5	0.48	0.36	0.08	0.4	0.22	0.08	0.6	1.24
SWGCP_only_5000/SWlin2006.16495.cnf	0.2	0.38	0.06	0.08	0.26	0.28	0.1	0.24	0.36	0.3	0.12	0.46	0.44	0.3	0.08	0.34	0.2	0.1	0.62	0.96
SWGCP_only_5000/SWlin2006.16496.cnf	0.2	0.46	0.08	0.08	0.32	0.28	0.08	0.3	0.42	0.3	0.12	0.54	0.54	0.46	0.08	0.48	0.22	0.1	0.56	1.18
SWGCP_only_5000/SWlin2006.16497.cnf	0.18	0.46	0.08	0.06	0.08	0.24	0.08	0.08	0.12	0.32	0.06	0.4	0.2	0.04	0.08	0.14	0.2	0.1	0.6	0.94
SWGCP_only_5000/SWlin2006.16498.cnf	0.3	0.26	0.1	0.14	0.48	0.44	0.16	0.42	0.38	0.44	0.14	0.54	0.98	0.42	0.12	0.54	0.34	0.12	1.1	2.0
SWGCP_only_5000/SWlin2006.16499.cnf	0.06	0.04	0.06	0.06	0.06	0.1	0.06	0.04	0.02	0.26	0.1	0.4	0.08	0.02	0.08	0.08	0.2	0.08	0.5	0.82
SWGCP_only_5000/SWlin2006.16500.cnf	0.14	0.3	0.08	0.04	0.22	0.22	0.06	0.18	0.24	0.22	0.08	0.34	0.34	0.28	0.08	0.28	0.16	0.08	0.42	0.76
SWGCP_only_5000/SWlin2006.16501.cnf	0.26	0.5	0.12	0.12	0.36	0.4	0.14	0.44	0.42	0.4	0.14	0.6	0.8	0.6	0.1	0.44	0.3	0.12	0.9	1.72
SWGCP_only_5000/SWlin2006.16502.cnf	0.24	0.06	0.08	0.08	0.08	0.34	0.1	0.28	0.02	0.36	0.1	0.52	0.74	0.06	0.08	0.04	0.14	0.1	0.78	1.16
SWGCP_only_5000/SWlin2006.16503.cnf	0.2	0.28	0.12	0.12	0.42	0.3	0.14	0.42	0.34	0.44	0.12	0.66	0.3	0.38	0.12	0.52	0.24	0.14	0.8	1.94
SWGCP_only_5000/SWlin2006.16504.cnf	0.28	0.64	0.1	0.12	0.52	0.42	0.12	0.4	0.58	0.42	0.16	0.66	0.78	0.54	0.1	0.52	0.34	0.14	0.8	1.9
SWGCP_only_5000/SWlin2006.16505.cnf	0.2	0.46	0.1	0.08	0.34	0.34	0.1	0.28	0.4	0.28	0.1	0.5	0.56	0.48	0.1	0.46	0.2	0.08	0.86	1.26
SWGCP_only_5000/SWlin2006.16506.cnf	0.12	0.2	0.06	0.04	0.2	0.16	0.06	0.16	0.18	0.18	0.06	0.24	0.22	0.18	0.06	0.2	0.14	0.06	0.38	0.6
SWGCP_only_5000/SWlin2006.16507.cnf	0.28	0.68	0.1	0.1	0.4	0.22	0.12	0.32	0.06	0.36	0.12	0.72	0.54	0.5	0.12	0.4	0.3	0.12	0.56	1.6
SWGCP_only_5000/SWlin2006.16508.cnf	0.26	0.62	0.1	0.1	0.36	0.34	0.1	0.4	0.4	0.38	0.12	0.64	0.52	0.58	0.08	0.5	0.24	0.1	0.94	1.78
SWGCP_only_5000/SWlin2006.16509.cnf	0.2	0.78	0.1	0.1	0.28	0.26	0.12	0.14	0.16	0.34	0.12	0.52	0.1	0.5	0.1	0.44	0.32	0.1	0.82	1.38
SWGCP_only_5000/SWlin2006.16510.cnf	0.14	0.44	0.04	0.06	0.24	0.22	0.06	0.22	0.28	0.24	0.08	0.34	0.46	0.34	0.06	0.3	0.16	0.06	0.48	0.68
SWGCP_only_5000/SWlin2006.16511.cnf	0.14	0.74	0.08	0.1	0.34	0.18	0.12	0.3	0.04	0.4	0.1	0.58	0.6	0.18	0.08	0.38	0.06	0.08	0.82	1.24
SWGCP_only_5000/SWlin2006.16512.cnf	0.14	0.02	0.08	0.06	0.28	0.04	0.08	0.24	0.12	0.28	0.1	0.42	0.12	0.34	0.08	0.34	0.18	0.08	0.14	0.84
SWGCP_only_5000/SWlin2006.16513.cnf	0.32	0.66	0.1	0.12	0.34	0.26	0.12	0.42	0.44	0.46	0.12	0.44	0.92	0.48	0.1	0.58	0.3	0.12	1.1	2.0
SWGCP_only_5000/SWlin2006.16514.cnf	0.18	0.44	0.06	0.06	0.26	0.22	0.08	0.24	0.32	0.24	0.08	0.38	0.46	0.36	0.06	0.32	0.18	0.1	0.6	0.78
SWGCP_only_5000/SWlin2006.16515.cnf	0.28	0.66	0.1	0.12	0.5	0.44	0.14	0.42	0.46	0.54	0.14	0.74	0.86	0.58	0.12	0.56	0.28	0.12	0.9	1.8
SWGCP_only_5000/SWlin2006.16516.cnf	0.24	0.44	0.08	0.1	0.3	0.32	0.1	0.3	0.38	0.34	0.12	0.44	0.44	0.4	0.08	0.4	0.24	0.08	0.56	1.22
SWGCP_only_5000/SWlin2006.16517.cnf	0.26	0.6	0.06	0.1	0.3	0.3	0.08	0.26	0.34	0.24	0.1	0.5	0.56	0.38	0.1	0.4	0.26	0.1	0.58	1.16
SWGCP_only_5000/SWlin2006.16518.cnf	0.32	0.56	0.1	0.12	0.46	0.38	0.16	0.46	0.34	0.48	0.14	0.5	0.86	0.78	0.12	0.38	0.34	0.12	0.56	1.96
SWGCP_only_5000/SWlin2006.16519.cnf	0.18	0.26	0.08	0.08	0.24	0.26	0.08	0.2	0.26	0.26	0.08	0.32	0.3	0.3	0.06	0.28	0.18	0.1	0.54	1.02
SWGCP_only_5000/SWlin2006.16520.cnf	0.24	0.26	0.06	0.08	0.14	0.3	0.1	0.24	0.42	0.1	0.12	0.52	0.7	0.08	0.08	0.36	0.06	0.12	0.7	1.18
SWGCP_only_5000/SWlin2006.16521.cnf	0.2	0.42	0.04	0.06	0.28	0.26	0.1	0.28	0.4	0.32	0.1	0.36	0.44	0.28	0.04	0.34	0.2	0.1	0.44	0.94
SWGCP_only_5000/SWlin2006.16522.cnf	0.04	0.0	0.06	0.06	0.18	0.04	0.06	0.0	0.08	0.22	0.08	0.0	0.02	0.26	0.06	0.02	0.1	0.08	0.02	0.54
SWGCP_only_5000/SWlin2006.16523.cnf	0.12	0.26	0.06	0.06	0.2	0.2	0.06	0.16	0.22	0.2	0.06	0.26	0.32	0.22	0.06	0.22	0.14	0.06	0.36	0.56
SWGCP_only_5000/SWlin2006.16524.cnf	0.16	0.44	0.08	0.06	0.24	0.24	0.06	0.18	0.3	0.2	0.06	0.36	0.52	0.36	0.06	0.3	0.18	0.08	0.54	0.68
SWGCP_only_5000/SWlin2006.16525.cnf	0.26	0.5	0.12	0.12	0.42	0.36	0.14	0.36	0.4	0.4	0.14	0.56	0.64	0.4	0.12	0.5	0.26	0.12	0.88	2.0
SWGCP_only_5000/SWlin2006.16526.cnf	0.2	0.44	0.1	0.08	0.28	0.44	0.12	0.34	0.32	0.4	0.12	0.5	0.64	0.42	0.1	0.44	0.22	0.1	0.76	1.48
SWGCP_only_5000/SWlin2006.16527.cnf	0.14	0.32	0.06	0.06	0.2	0.24	0.08	0.2	0.28	0.22	0.08	0.3	0.38	0.3	0.08	0.26	0.14	0.08	0.44	0.7
SWGCP_only_5000/SWlin2006.16528.cnf	0.04	0.12	0.06	0.08	0.3	0.3	0.12	0.26	0.42	0.06	0.1	0.06	0.52	0.32	0.08	0.44	0.22	0.08	0.72	1.08
SWGCP_only_5000/SWlin2006.16529.cnf	0.14	0.36	0.08	0.06	0.18	0.22	0.06	0.2	0.28	0.26	0.06	0.38	0.38	0.32	0.06	0.26	0.16	0.08	0.46	0.72
SWGCP_only_5000/SWlin2006.16530.cnf	0.16	0.32	0.08	0.08	0.24	0.24	0.08	0.24	0.3	0.26	0.12	0.36	0.4	0.32	0.08	0.3	0.2	0.1	0.56	0.94
SWGCP_only_5000/SWlin2006.16531.cnf	0.22	0.74	0.1	0.1	0.42	0.44	0.14	0.36	0.42	0.36	0.16	0.6	0.5	0.52	0.12	0.44	0.3	0.12	0.76	1.8
SWGCP_only_5000/SWlin2006.16532.cnf	0.2	0.42	0.08	0.08	0.28	0.3	0.1	0.3	0.36	0.34	0.1	0.58	0.82	0.3	0.1	0.34	0.16	0.1	0.8	1.3
SWGCP_only_5000/SWlin2006.16533.cnf	0.18	0.26	0.06	0.1	0.34	0.38	0.08	0.34	0.28	0.34	0.12	0.54	0.26	0.28	0.1	0.44	0.18	0.1	0.78	1.54
SWGCP_only_5000/SWlin2006.16534.cnf	0.24	0.4	0.08	0.1	0.42	0.4	0.12	0.3	0.34	0.36	0.12	0.74	0.68	0.52	0.12	0.5	0.26	0.1	0.88	1.64
SWGCP_only_5000/SWlin2006.16535.cnf	0.18	0.14	0.08	0.06	0.26	0.22	0.08	0.26	0.28	0.06	0.1	0.1	0.6	0.1	0.08	0.4	0.16	0.1	0.48	1.0
SWGCP_only_5000/SWlin2006.16536.cnf	0.12	0.48	0.06	0.06	0.28	0.28	0.08	0.24	0.36	0.02	0.08	0.44	0.54	0.38	0.06	0.02	0.22	0.1	0.54	0.88
SWGCP_only_5000/SWlin2006.16537.cnf	0.04	0.02	0.02	0.06	0.02	0.2	0.08	0.04	0.04	0.06	0.06	0.04	0.1	0.04	0.06	0.04	0.12	0.08	0.04	0.66
SWGCP_only_5000/SWlin2006.16538.cnf	0.14	0.28	0.06	0.04	0.24	0.22	0.1	0.2	0.26	0.22	0.06	0.36	0.3	0.24	0.08	0.28	0.16	0.08	0.44	0.72
SWGCP_only_5000/SWlin2006.16539.cnf	0.2	0.52	0.04	0.1	0.3	0.3	0.12	0.26	0.16	0.3	0.08	0.48	0.06	0.38	0.08	0.18	0.24	0.08	0.28	1.02
SWGCP_only_5000/SWlin2006.16540.cnf	0.06	0.44	0.1	0.08	0.16	0.36	0.1	0.3	0.36	0.38	0.1	0.56	0.48	0.42	0.08	0.18	0.24	0.1	0.68	1.26
SWGCP_only_5000/SWlin2006.16541.cnf	0.02	0.42	0.06	0.08	0.04	0.24	0.08	0.18	0.2	0.08	0.1	0.08	0.3	0.4	0.06	0.3	0.2	0.08	0.64	0.84
SWGCP_only_5000/SWlin2006.16542.cnf	0.16	0.58	0.06	0.06	0.3	0.3	0.1	0.28	0.38	0.32	0.1	0.46	0.62	0.32	0.06	0.34	0.2	0.1	0.68	1.0
SWGCP_only_5000/SWlin2006.16543.cnf	0.16	0.64	0.08	0.1	0.36	0.34	0.1	0.3	0.48	0.4	0.08	0.58	0.6	0.4	0.08	0.46	0.24	0.12	0.58	1.24
SWGCP_only_5000/SWlin2006.16544.cnf	0.26	0.8	0.1	0.12	0.46	0.42	0.12	0.42	0.58	0.4	0.12	0.6	0.26	0.68	0.1	0.4	0.18	0.1	1.08	1.74
SWGCP_only_5000/SWlin2006.16545.cnf	0.18	0.52	0.06	0.08	0.28	0.24	0.08	0.24	0.34	0.26	0.08	0.18	0.64	0.42	0.06	0.38	0.22	0.08	0.66	0.86
SWGCP_only_5000/SWlin2006.16546.cnf	0.12	0.14	0.06	0.06	0.18	0.16	0.06	0.04	0.02	0.18	0.04	0.24	0.04	0.12	0.06	0.22	0.16	0.06	0.08	0.52
SWGCP_only_5000/SWlin2006.16547.cnf	0.2	0.26	0.08	0.08	0.3	0.28	0.1	0.28	0.04	0.08	0.1	0.18	0.66	0.44	0.08	0.3	0.24	0.08	0.56	0.98
SWGCP_only_5000/SWlin2006.16548.cnf	0.2	0.22	0.08	0.06	0.06	0.1	0.1	0.12	0.06	0.34	0.08	0.52	0.78	0.08	0.08	0.18	0.22	0.08	0.18	1.06
SWGCP_only_5000/SWlin2006.16549.cnf	0.18	0.36	0.1	0.08	0.3	0.34	0.12	0.28	0.42	0.26	0.1	0.56	0.76	0.5	0.08	0.4	0.24	0.1	0.72	1.2
SWGCP_only_5000/SWlin2006.16550.cnf	0.06	0.18	0.06	0.06	0.04	0.22	0.08	0.04	0.3	0.02	0.08	0.02	0.08	0.06	0.06	0.02	0.16	0.08	0.06	0.7
SWGCP_only_5000/SWlin2006.16551.cnf	0.12	0.26	0.04	0.08	0.2	0.18	0.08	0.14	0.18	0.18	0.06	0.26	0.32	0.24	0.04	0.22	0.14	0.06	0.36	0.6
SWGCP_only_5000/SWlin2006.16552.cnf	0.16	0.36	0.06	0.08	0.24	0.22	0.06	0.2	0.3	0.24	0.08	0.34	0.48	0.32	0.08	0.3	0.18	0.1	0.48	0.68
SWGCP_only_5000/SWlin2006.16553.cnf	0.2	0.7	0.08	0.1	0.32	0.32	0.1	0.28	0.42	0.34	0.1	0.6	0.66	0.44	0.06	0.4	0.28	0.12	0.7	1.16
SWGCP_only_5000/SWlin2006.16554.cnf	0.18	0.48	0.08	0.08	0.32	0.28	0.08	0.26	0.32	0.3	0.08	0.44	0.64	0.34	0.08	0.38	0.24	0.1	0.68	1.0
SWGCP_only_5000/SWlin2006.16555.cnf	0.2	0.3	0.1	0.1	0.36	0.28	0.08	0.24	0.4	0.34	0.08	0.48	0.38	0.28	0.08	0.4	0.22	0.1	0.52	1.28
SWGCP_only_5000/SWlin2006.16556.cnf	0.18	0.54	0.04	0.06	0.28	0.1	0.1	0.24	0.36	0.08	0.1	0.2	0.04	0.08	0.08	0.36	0.08	0.06	0.16	0.88
SWGCP_only_5000/SWlin2006.16557.cnf	0.16	0.24	0.08	0.08	0.3	0.32	0.08	0.22	0.28	0.24	0.1	0.4	0.34	0.3	0.12	0.34	0.18	0.1	0.54	1.14
SWGCP_only_5000/SWlin2006.16558.cnf	0.26	0.36	0.08	0.08	0.34	0.32	0.1	0.34	0.44	0.4	0.12	0.18	0.12	0.12	0.08	0.4	0.26	0.1	0.22	1.34
SWGCP_only_5000/SWlin2006.16559.cnf	0.2	0.68	0.06	0.1	0.34	0.16	0.1	0.3	0.38	0.38	0.1	0.54	0.52	0.06	0.08	0.16	0.2	0.1	0.9	1.24
SWGCP_only_5000/SWlin2006.16560.cnf	0.18	0.46	0.08	0.12	0.38	0.14	0.12	0.32	0.08	0.42	0.12	0.24	0.7	0.44	0.1	0.5	0.32	0.1	0.64	1.52
SWGCP_only_5000/SWlin2006.16561.cnf	0.02	0.52	0.06	0.04	0.26	0.22	0.08	0.16	0.3	0.2	0.1	0.4	0.06	0.02	0.04	0.02	0.08	0.08	0.06	0.76
SWGCP_only_5000/SWlin2006.16562.cnf	0.28	0.78	0.1	0.1	0.26	0.42	0.12	0.46	0.24	0.5	0.14	0.6	0.46	0.7	0.12	0.66	0.34	0.1	1.02	1.86
SWGCP_only_5000/SWlin2006.16563.cnf	0.28	0.5	0.1	0.1	0.48	0.42	0.12	0.38	0.52	0.48	0.14	0.74	0.6	0.5	0.1	0.56	0.1	0.14	0.84	1.78
SWGCP_only_5000/SWlin2006.16564.cnf	0.22	0.62	0.1	0.08	0.38	0.34	0.1	0.32	0.28	0.34	0.14	0.6	0.46	0.1	0.08	0.52	0.3	0.1	0.66	1.48
SWGCP_only_5000/SWlin2006.16565.cnf	0.26	0.46	0.1	0.1	0.46	0.34	0.12	0.4	0.44	0.42	0.14	0.6	0.48	0.42	0.12	0.44	0.26	0.12	0.94	1.9
SWGCP_only_5000/SWlin2006.16566.cnf	0.06	0.0	0.06	0.08	0.26	0.2	0.08	0.22	0.24	0.22	0.1	0.38	0.04	0.06	0.06	0.28	0.2	0.08	0.52	0.74
SWGCP_only_5000/SWlin2006.16567.cnf	0.18	0.62	0.08	0.08	0.34	0.28	0.08	0.28	0.46	0.32	0.1	0.48	0.72	0.46	0.08	0.4	0.26	0.1	0.58	1.12
SWGCP_only_5000/SWlin2006.16568.cnf	0.2	0.2	0.12	0.12	0.46	0.4	0.1	0.38	0.34	0.42	0.1	0.66	0.7	0.54	0.1	0.52	0.38	0.12	0.52	1.68
SWGCP_only_5000/SWlin2006.16569.cnf	0.22	0.7	0.08	0.08	0.36	0.38	0.06	0.3	0.52	0.42	0.12	0.44	0.9	0.42	0.1	0.46	0.24	0.1	0.78	1.34
SWGCP_only_5000/SWlin2006.16570.cnf	0.1	0.32	0.04	0.08	0.18	0.16	0.04	0.16	0.22	0.18	0.08	0.28	0.38	0.28	0.06	0.22	0.12	0.08	0.4	0.52
SWGCP_only_5000/SWlin2006.16571.cnf	0.22	0.58	0.1	0.1	0.36	0.32	0.12	0.34	0.52	0.34	0.12	0.54	0.54	0.52	0.08	0.52	0.26	0.12	0.62	1.46
SWGCP_only_5000/SWlin2006.16572.cnf	0.24	0.6	0.06	0.08	0.34	0.34	0.1	0.26	0.42	0.34	0.1	0.46	0.82	0.44	0.08	0.42	0.28	0.1	0.74	1.14
SWGCP_only_5000/SWlin2006.16573.cnf	0.14	0.4	0.06	0.08	0.24	0.24	0.08	0.24	0.32	0.24	0.08	0.38	0.46	0.32	0.08	0.28	0.16	0.08	0.54	0.76
SWGCP_only_5000/SWlin2006.16574.cnf	0.06	0.44	0.08	0.08	0.32	0.08	0.1	0.28	0.44	0.04	0.1	0.3	0.7	0.04	0.06	0.36	0.22	0.1	0.48	1.06
SWGCP_only_5000/SWlin2006.16575.cnf	0.24	0.32	0.1	0.1	0.34	0.36	0.1	0.3	0.3	0.32	0.12	0.4	0.4	0.34	0.1	0.44	0.24	0.1	0.84	1.54
SWGCP_only_5000/SWlin2006.16576.cnf	0.18	0.88	0.08	0.1	0.46	0.36	0.12	0.36	0.46	0.44	0.12	0.6	0.92	0.58	0.12	0.38	0.32	0.1	0.94	1.7
SWGCP_only_5000/SWlin2006.16577.cnf	0.24	0.84	0.08	0.1	0.36	0.4	0.12	0.32	0.5	0.4	0.14	0.48	0.68	0.46	0.12	0.58	0.3	0.12	0.86	1.56
SWGCP_only_5000/SWlin2006.16578.cnf	0.26	0.6	0.08	0.1	0.42	0.34	0.1	0.34	0.4	0.38	0.12	0.64	0.88	0.56	0.1	0.44	0.28	0.1	0.74	1.42
SWGCP_only_5000/SWlin2006.16579.cnf	0.14	0.22	0.04	0.08	0.18	0.16	0.06	0.16	0.16	0.18	0.06	0.24	0.26	0.2	0.04	0.2	0.12	0.08	0.34	0.48
SWGCP_only_5000/SWlin2006.16580.cnf	0.14	0.26	0.06	0.06	0.18	0.18	0.06	0.14	0.2	0.18	0.06	0.26	0.4	0.24	0.06	0.2	0.12	0.08	0.32	0.5
SWGCP_only_5000/SWlin2006.16581.cnf	0.16	0.42	0.06	0.08	0.04	0.24	0.08	0.2	0.32	0.24	0.1	0.34	0.5	0.14	0.08	0.28	0.12	0.06	0.2	0.72
SWGCP_only_5000/SWlin2006.16582.cnf	0.18	0.4	0.06	0.06	0.3	0.24	0.08	0.24	0.38	0.24	0.08	0.48	0.42	0.4	0.08	0.3	0.22	0.06	0.5	0.92
SWGCP_only_5000/SWlin2006.16583.cnf	0.18	0.48	0.06	0.08	0.28	0.32	0.12	0.3	0.48	0.34	0.12	0.5	0.76	0.4	0.08	0.44	0.24	0.1	0.74	1.2
SWGCP_only_5000/SWlin2006.16584.cnf	0.06	0.54	0.06	0.08	0.28	0.28	0.1	0.24	0.36	0.28	0.1	0.42	0.06	0.42	0.06	0.36	0.06	0.08	0.6	0.88
SWGCP_only_5000/SWlin2006.16585.cnf	0.24	0.56	0.12	0.12	0.46	0.42	0.1	0.38	0.48	0.52	0.12	0.58	1.0	0.56	0.12	0.58	0.26	0.12	0.72	1.68
SWGCP_only_5000/SWlin2006.16586.cnf	0.2	0.54	0.1	0.1	0.36	0.36	0.1	0.38	0.4	0.34	0.1	0.54	0.86	0.52	0.1	0.46	0.28	0.1	0.58	1.52
SWGCP_only_5000/SWlin2006.16587.cnf	0.26	0.5	0.08	0.1	0.34	0.36	0.12	0.3	0.5	0.3	0.12	0.62	0.1	0.06	0.08	0.48	0.12	0.1	0.66	1.36
SWGCP_only_5000/SWlin2006.16588.cnf	0.1	0.6	0.08	0.1	0.36	0.32	0.1	0.3	0.4	0.36	0.12	0.56	0.6	0.14	0.1	0.42	0.24	0.1	0.64	1.26
SWGCP_only_5000/SWlin2006.16589.cnf	0.1	0.18	0.06	0.08	0.18	0.18	0.08	0.16	0.18	0.2	0.06	0.26	0.26	0.2	0.06	0.2	0.12	0.06	0.38	0.6
SWGCP_only_5000/SWlin2006.16590.cnf	0.14	0.42	0.06	0.06	0.24	0.2	0.08	0.2	0.32	0.22	0.08	0.34	0.5	0.34	0.06	0.3	0.16	0.06	0.54	0.68
SWGCP_only_5000/SWlin2006.16591.cnf	0.16	0.42	0.06	0.08	0.26	0.22	0.08	0.2	0.34	0.26	0.08	0.34	0.46	0.36	0.08	0.3	0.16	0.08	0.6	0.84
SWGCP_only_5000/SWlin2006.16592.cnf	0.26	0.38	0.1	0.1	0.32	0.38	0.1	0.32	0.52	0.38	0.12	0.48	0.92	0.44	0.12	0.44	0.26	0.1	0.88	1.54
SWGCP_only_5000/SWlin2006.16593.cnf	0.24	0.42	0.08	0.08	0.34	0.38	0.12	0.38	0.46	0.36	0.12	0.54	0.68	0.5	0.08	0.48	0.26	0.12	0.7	1.44
SWGCP_only_5000/SWlin2006.16594.cnf	0.28	0.86	0.1	0.1	0.4	0.12	0.14	0.34	0.14	0.54	0.12	0.6	0.12	0.68	0.1	0.54	0.26	0.1	0.86	1.74
SWGCP_only_5000/SWlin2006.16595.cnf	0.2	0.4	0.08	0.06	0.1	0.04	0.1	0.26	0.12	0.04	0.1	0.38	0.44	0.06	0.06	0.2	0.16	0.08	0.72	0.96
SWGCP_only_5000/SWlin2006.16596.cnf	0.12	0.24	0.08	0.08	0.18	0.2	0.06	0.16	0.16	0.2	0.08	0.3	0.32	0.22	0.06	0.24	0.14	0.08	0.4	0.64
SWGCP_only_5000/SWlin2006.16597.cnf	0.22	0.06	0.08	0.08	0.18	0.32	0.1	0.24	0.04	0.26	0.1	0.44	0.1	0.24	0.1	0.4	0.26	0.12	0.18	1.34
SWGCP_only_5000/SWlin2006.16598.cnf	0.26	0.58	0.1	0.12	0.44	0.46	0.12	0.42	0.66	0.36	0.14	0.7	0.4	0.14	0.1	0.5	0.3	0.12	1.0	1.88
SWGCP_only_5000/SWlin2006.16599.cnf	0.2	0.54	0.08	0.1	0.34	0.4	0.12	0.3	0.4	0.36	0.1	0.52	0.62	0.36	0.1	0.42	0.26	0.1	0.54	1.36
SWGCP_only_5000/SWlin2006.16600.cnf	0.24	0.26	0.1	0.1	0.34	0.34	0.1	0.3	0.42	0.34	0.12	0.54	0.56	0.48	0.1	0.34	0.24	0.1	0.7	1.48
SWGCP_only_5000/SWlin2006.16601.cnf	0.16	0.06	0.08	0.08	0.24	0.06	0.08	0.06	0.06	0.02	0.08	0.06	0.06	0.42	0.06	0.2	0.1	0.08	0.48	0.88
SWGCP_only_5000/SWlin2006.16602.cnf	0.22	0.18	0.08	0.06	0.12	0.28	0.08	0.16	0.38	0.3	0.08	0.5	0.18	0.42	0.06	0.42	0.24	0.1	0.7	1.1
SWGCP_only_5000/SWlin2006.16603.cnf	0.18	0.28	0.06	0.08	0.26	0.22	0.08	0.22	0.28	0.26	0.08	0.36	0.48	0.32	0.08	0.34	0.18	0.08	0.58	0.84
SWGCP_only_5000/SWlin2006.16604.cnf	0.24	0.36	0.1	0.1	0.4	0.32	0.12	0.32	0.44	0.36	0.12	0.54	0.84	0.44	0.08	0.46	0.28	0.1	0.88	1.46
SWGCP_only_5000/SWlin2006.16605.cnf	0.26	0.26	0.1	0.12	0.18	0.36	0.12	0.36	0.48	0.48	0.12	0.2	0.52	0.1	0.12	0.14	0.14	0.1	1.16	1.82
SWGCP_only_5000/SWlin2006.16606.cnf	0.16	0.3	0.06	0.06	0.24	0.22	0.08	0.2	0.28	0.26	0.08	0.18	0.42	0.36	0.06	0.28	0.16	0.06	0.22	0.74
SWGCP_only_5000/SWlin2006.16607.cnf	0.14	0.4	0.08	0.08	0.26	0.22	0.1	0.24	0.34	0.24	0.1	0.34	0.44	0.4	0.08	0.3	0.18	0.1	0.58	0.84
SWGCP_only_5000/SWlin2006.16608.cnf	0.16	0.5	0.08	0.06	0.26	0.26	0.04	0.22	0.06	0.3	0.1	0.44	0.54	0.32	0.06	0.3	0.1	0.1	0.58	0.86
SWGCP_only_5000/SWlin2006.16609.cnf	0.26	0.12	0.08	0.08	0.2	0.4	0.1	0.3	0.32	0.42	0.1	0.52	0.68	0.38	0.08	0.42	0.22	0.12	0.56	1.36
SWGCP_only_5000/SWlin2006.16610.cnf	0.12	0.28	0.06	0.06	0.18	0.18	0.06	0.18	0.2	0.22	0.08	0.32	0.34	0.26	0.08	0.24	0.12	0.06	0.44	0.6
SWGCP_only_5000/SWlin2006.16611.cnf	0.18	0.44	0.1	0.12	0.4	0.38	0.12	0.4	0.34	0.46	0.12	0.18	0.5	0.58	0.1	0.54	0.38	0.12	0.88	1.84
SWGCP_only_5000/SWlin2006.16612.cnf	0.2	0.56	0.08	0.1	0.38	0.34	0.12	0.32	0.5	0.38	0.12	0.46	0.56	0.46	0.1	0.5	0.26	0.1	0.6	1.54
SWGCP_only_5000/SWlin2006.16613.cnf	0.22	0.12	0.06	0.08	0.32	0.34	0.1	0.28	0.08	0.34	0.1	0.56	0.78	0.48	0.08	0.44	0.24	0.1	0.7	1.22
SWGCP_only_5000/SWlin2006.16614.cnf	0.16	0.42	0.06	0.06	0.06	0.06	0.1	0.24	0.3	0.26	0.08	0.36	0.24	0.02	0.08	0.32	0.08	0.1	0.68	0.94
SWGCP_only_5000/SWlin2006.16615.cnf	0.24	0.88	0.1	0.14	0.44	0.4	0.14	0.42	0.6	0.32	0.14	0.7	0.58	0.46	0.1	0.18	0.36	0.12	1.28	2.04
SWGCP_only_5000/SWlin2006.16616.cnf	0.16	0.38	0.08	0.08	0.28	0.24	0.08	0.26	0.3	0.24	0.08	0.36	0.46	0.32	0.08	0.34	0.2	0.1	0.54	0.96
SWGCP_only_5000/SWlin2006.16617.cnf	0.12	0.12	0.08	0.08	0.32	0.32	0.1	0.28	0.48	0.38	0.1	0.42	0.54	0.52	0.06	0.46	0.28	0.1	0.6	1.24
SWGCP_only_5000/SWlin2006.16618.cnf	0.24	0.84	0.1	0.12	0.36	0.4	0.1	0.38	0.52	0.42	0.1	0.64	0.68	0.62	0.1	0.62	0.28	0.1	0.72	1.66
SWGCP_only_5000/SWlin2006.16619.cnf	0.26	0.54	0.1	0.1	0.42	0.42	0.12	0.34	0.56	0.44	0.1	0.68	0.9	0.48	0.1	0.5	0.26	0.12	0.86	1.46
SWGCP_only_5000/SWlin2006.16620.cnf	0.18	0.12	0.1	0.1	0.4	0.1	0.1	0.34	0.38	0.34	0.12	0.5	0.12	0.18	0.08	0.48	0.3	0.1	0.9	1.4
SWGCP_only_5000/SWlin2006.16621.cnf	0.1	0.16	0.06	0.06	0.18	0.18	0.08	0.14	0.18	0.18	0.06	0.26	0.2	0.18	0.06	0.22	0.12	0.06	0.3	0.58
SWGCP_only_5000/SWlin2006.16622.cnf	0.14	0.4	0.06	0.06	0.22	0.2	0.08	0.18	0.26	0.24	0.06	0.32	0.48	0.28	0.06	0.28	0.18	0.06	0.48	0.64
SWGCP_only_5000/SWlin2006.16623.cnf	0.26	0.56	0.1	0.12	0.42	0.4	0.14	0.38	0.46	0.5	0.12	0.74	0.98	0.56	0.12	0.42	0.3	0.12	0.92	1.86
SWGCP_only_5000/SWlin2006.16624.cnf	0.22	0.48	0.1	0.12	0.42	0.34	0.14	0.34	0.28	0.42	0.12	0.48	0.52	0.38	0.12	0.62	0.28	0.14	0.8	1.82
SWGCP_only_5000/SWlin2006.16625.cnf	0.18	0.6	0.08	0.1	0.34	0.36	0.1	0.3	0.5	0.34	0.1	0.56	0.54	0.46	0.1	0.52	0.24	0.12	0.76	1.42
SWGCP_only_5000/SWlin2006.16626.cnf	0.26	0.64	0.1	0.14	0.36	0.42	0.12	0.38	0.58	0.44	0.14	0.6	0.86	0.7	0.1	0.56	0.28	0.12	1.12	1.78
SWGCP_only_5000/SWlin2006.16627.cnf	0.22	0.22	0.08	0.12	0.32	0.3	0.12	0.22	0.44	0.42	0.12	0.6	0.88	0.42	0.08	0.46	0.12	0.1	0.76	1.28
SWGCP_only_5000/SWlin2006.16628.cnf	0.2	0.48	0.08	0.08	0.26	0.34	0.08	0.28	0.32	0.32	0.1	0.44	0.62	0.36	0.08	0.42	0.24	0.1	0.68	1.1
SWGCP_only_5000/SWlin2006.16629.cnf	0.26	0.34	0.1	0.1	0.34	0.36	0.12	0.36	0.38	0.3	0.12	0.6	0.56	0.42	0.1	0.46	0.26	0.12	0.88	1.52
SWGCP_only_5000/SWlin2006.16630.cnf	0.26	0.56	0.1	0.12	0.4	0.4	0.12	0.3	0.56	0.38	0.12	0.6	0.22	0.54	0.1	0.54	0.26	0.1	0.78	1.6
SWGCP_only_5000/SWlin2006.16631.cnf	0.28	0.68	0.1	0.12	0.38	0.44	0.12	0.4	0.06	0.46	0.16	0.78	0.54	0.54	0.12	0.48	0.3	0.12	1.02	1.86
SWGCP_only_5000/SWlin2006.16632.cnf	0.2	0.44	0.08	0.08	0.08	0.28	0.1	0.3	0.4	0.3	0.1	0.54	0.82	0.44	0.08	0.4	0.22	0.08	0.82	1.2
SWGCP_only_5000/SWlin2006.16633.cnf	0.12	0.3	0.04	0.06	0.2	0.18	0.06	0.18	0.22	0.2	0.08	0.24	0.36	0.26	0.04	0.2	0.16	0.06	0.42	0.56
SWGCP_only_5000/SWlin2006.16634.cnf	0.24	0.9	0.12	0.12	0.4	0.46	0.12	0.4	0.66	0.44	0.12	0.64	0.82	0.46	0.14	0.54	0.3	0.1	0.76	1.96
SWGCP_only_5000/SWlin2006.16635.cnf	0.18	0.46	0.06	0.06	0.04	0.28	0.02	0.02	0.28	0.32	0.1	0.24	0.64	0.04	0.04	0.1	0.08	0.08	0.56	0.88
SWGCP_only_5000/SWlin2006.16636.cnf	0.26	0.3	0.12	0.1	0.54	0.44	0.12	0.36	0.1	0.44	0.12	0.66	0.8	0.24	0.1	0.5	0.32	0.1	0.76	1.84
SWGCP_only_5000/SWlin2006.16637.cnf	0.16	0.7	0.08	0.08	0.14	0.32	0.1	0.28	0.44	0.3	0.12	0.06	0.12	0.52	0.1	0.48	0.22	0.1	0.66	1.2
SWGCP_only_5000/SWlin2006.16638.cnf	0.06	0.0	0.06	0.06	0.02	0.2	0.06	0.04	0.08	0.0	0.04	0.3	0.06	0.3	0.06	0.04	0.04	0.08	0.02	0.58
SWGCP_only_5000/SWlin2006.16639.cnf	0.2	0.34	0.12	0.12	0.44	0.32	0.12	0.32	0.38	0.38	0.14	0.6	0.34	0.36	0.12	0.46	0.26	0.12	0.76	1.96
SWGCP_only_5000/SWlin2006.16640.cnf	0.24	0.88	0.08	0.1	0.4	0.4	0.14	0.44	0.4	0.44	0.14	0.78	0.84	0.52	0.1	0.52	0.26	0.1	0.8	1.92
SWGCP_only_5000/SWlin2006.16641.cnf	0.18	0.26	0.08	0.06	0.3	0.02	0.08	0.3	0.44	0.34	0.08	0.06	0.74	0.12	0.06	0.08	0.08	0.08	0.16	1.06
SWGCP_only_5000/SWlin2006.16642.cnf	0.14	0.38	0.08	0.04	0.24	0.2	0.06	0.22	0.3	0.22	0.06	0.36	0.52	0.32	0.06	0.28	0.16	0.06	0.52	0.68
SWGCP_only_5000/SWlin2006.16643.cnf	0.02	0.04	0.06	0.08	0.22	0.04	0.08	0.08	0.22	0.0	0.08	0.04	0.04	0.02	0.06	0.1	0.02	0.08	0.02	0.64
SWGCP_only_5000/SWlin2006.16644.cnf	0.14	0.02	0.06	0.06	0.04	0.22	0.06	0.22	0.16	0.26	0.08	0.38	0.56	0.38	0.06	0.3	0.2	0.08	0.56	0.78
SWGCP_only_5000/SWlin2006.16645.cnf	0.18	0.14	0.06	0.08	0.28	0.24	0.08	0.24	0.38	0.24	0.1	0.36	0.36	0.32	0.08	0.34	0.22	0.08	0.62	0.9
SWGCP_only_5000/SWlin2006.16646.cnf	0.2	0.42	0.06	0.08	0.3	0.26	0.08	0.32	0.38	0.3	0.1	0.46	0.68	0.52	0.08	0.4	0.24	0.1	0.76	1.16
SWGCP_only_5000/SWlin2006.16647.cnf	0.18	0.36	0.08	0.06	0.3	0.26	0.08	0.26	0.34	0.3	0.1	0.42	0.52	0.4	0.08	0.38	0.18	0.1	0.68	0.9
SWGCP_only_5000/SWlin2006.16648.cnf	0.26	0.48	0.1	0.08	0.42	0.34	0.12	0.36	0.5	0.46	0.12	0.22	0.12	0.42	0.1	0.46	0.28	0.1	0.94	1.68
SWGCP_only_5000/SWlin2006.16649.cnf	0.26	0.74	0.1	0.12	0.42	0.44	0.12	0.34	0.34	0.44	0.14	0.74	0.64	0.66	0.12	0.62	0.36	0.12	0.78	1.86
SWGCP_only_5000/SWlin2006.16650.cnf	0.12	0.32	0.06	0.06	0.2	0.2	0.1	0.18	0.28	0.2	0.08	0.3	0.44	0.28	0.06	0.26	0.18	0.08	0.36	0.66
SWGCP_only_5000/SWlin2006.16651.cnf	0.16	0.24	0.08	0.1	0.32	0.36	0.1	0.3	0.28	0.36	0.08	0.48	0.3	0.22	0.08	0.42	0.18	0.08	0.48	1.24
SWGCP_only_5000/SWlin2006.16652.cnf	0.28	0.22	0.08	0.1	0.36	0.08	0.1	0.28	0.38	0.42	0.12	0.66	0.6	0.46	0.08	0.44	0.24	0.1	0.72	1.38
SWGCP_only_5000/SWlin2006.16653.cnf	0.2	0.56	0.08	0.06	0.08	0.22	0.1	0.24	0.32	0.04	0.08	0.42	0.68	0.32	0.06	0.34	0.1	0.08	0.6	0.96
SWGCP_only_5000/SWlin2006.16654.cnf	0.2	0.54	0.08	0.1	0.32	0.3	0.08	0.28	0.32	0.34	0.08	0.38	0.5	0.34	0.06	0.32	0.2	0.08	0.62	1.16
SWGCP_only_5000/SWlin2006.16655.cnf	0.22	0.52	0.06	0.08	0.36	0.36	0.1	0.28	0.38	0.42	0.12	0.44	0.92	0.38	0.1	0.48	0.18	0.1	0.8	1.36
SWGCP_only_5000/SWlin2006.16656.cnf	0.3	0.26	0.1	0.14	0.36	0.46	0.12	0.36	0.62	0.14	0.14	0.68	0.26	0.7	0.1	0.52	0.16	0.1	1.2	1.82
SWGCP_only_5000/SWlin2006.16657.cnf	0.18	0.38	0.06	0.08	0.22	0.22	0.08	0.22	0.28	0.26	0.08	0.32	0.48	0.32	0.08	0.26	0.16	0.08	0.46	0.74
SWGCP_only_5000/SWlin2006.16658.cnf	0.24	0.42	0.1	0.1	0.42	0.16	0.14	0.1	0.42	0.42	0.12	0.6	0.04	0.38	0.06	0.16	0.12	0.1	0.58	1.46
SWGCP_only_5000/SWlin2006.16659.cnf	0.18	0.28	0.1	0.08	0.3	0.28	0.1	0.28	0.36	0.36	0.1	0.12	0.18	0.42	0.08	0.4	0.24	0.1	0.22	1.18
SWGCP_only_5000/SWlin2006.16660.cnf	0.2	0.64	0.08	0.06	0.36	0.28	0.08	0.32	0.44	0.36	0.1	0.58	0.44	0.46	0.08	0.46	0.24	0.1	0.78	1.14
SWGCP_only_5000/SWlin2006.16661.cnf	0.16	0.08	0.08	0.08	0.26	0.26	0.08	0.22	0.24	0.24	0.08	0.1	0.56	0.32	0.06	0.34	0.2	0.06	0.46	0.88
SWGCP_only_5000/SWlin2006.16662.cnf	0.2	0.68	0.08	0.1	0.38	0.1	0.08	0.38	0.56	0.4	0.12	0.66	0.68	0.24	0.1	0.5	0.2	0.1	0.64	1.44
SWGCP_only_5000/SWlin2006.16663.cnf	0.22	0.06	0.08	0.1	0.32	0.28	0.12	0.28	0.42	0.34	0.1	0.6	0.1	0.42	0.08	0.46	0.24	0.1	0.66	1.18
SWGCP_only_5000/SWlin2006.16664.cnf	0.14	0.72	0.1	0.12	0.46	0.44	0.12	0.38	0.56	0.22	0.12	0.74	1.0	0.18	0.1	0.32	0.26	0.1	1.02	1.7
SWGCP_only_5000/SWlin2006.16665.cnf	0.26	0.72	0.08	0.1	0.34	0.4	0.12	0.34	0.46	0.52	0.12	0.7	0.64	0.58	0.1	0.6	0.36	0.12	0.9	1.64
SWGCP_only_5000/SWlin2006.16666.cnf	0.16	0.02	0.06	0.08	0.24	0.22	0.06	0.2	0.1	0.24	0.1	0.1	0.56	0.38	0.06	0.26	0.18	0.08	0.48	0.74
SWGCP_only_5000/SWlin2006.16667.cnf	0.2	0.5	0.08	0.08	0.3	0.1	0.06	0.28	0.24	0.34	0.1	0.42	0.62	0.5	0.08	0.38	0.1	0.1	0.6	1.08
SWGCP_only_5000/SWlin2006.16668.cnf	0.18	0.62	0.08	0.08	0.26	0.32	0.08	0.26	0.28	0.34	0.1	0.5	0.56	0.38	0.06	0.36	0.24	0.08	0.64	1.06
SWGCP_only_5000/SWlin2006.16669.cnf	0.2	0.26	0.1	0.1	0.32	0.36	0.12	0.36	0.28	0.36	0.12	0.46	0.32	0.28	0.08	0.44	0.2	0.1	0.72	1.52
SWGCP_only_5000/SWlin2006.16670.cnf	0.28	0.64	0.08	0.1	0.4	0.4	0.14	0.36	0.14	0.44	0.12	0.64	0.8	0.26	0.1	0.6	0.3	0.1	0.64	1.64
SWGCP_only_5000/SWlin2006.16671.cnf	0.2	0.08	0.08	0.08	0.08	0.1	0.1	0.26	0.08	0.04	0.1	0.54	0.08	0.52	0.08	0.44	0.24	0.08	0.2	1.12
SWGCP_only_5000/SWlin2006.16672.cnf	0.14	0.76	0.08	0.1	0.4	0.34	0.1	0.26	0.52	0.4	0.14	0.6	0.52	0.44	0.1	0.52	0.26	0.1	0.92	1.38
SWGCP_only_5000/SWlin2006.16673.cnf	0.1	0.48	0.06	0.08	0.26	0.24	0.1	0.24	0.32	0.3	0.08	0.38	0.64	0.3	0.08	0.28	0.24	0.1	0.02	0.9
SWGCP_only_5000/SWlin2006.16674.cnf	0.2	0.36	0.1	0.06	0.32	0.34	0.12	0.32	0.36	0.32	0.1	0.58	0.28	0.28	0.08	0.46	0.2	0.1	0.74	1.44
SWGCP_only_5000/SWlin2006.16675.cnf	0.28	0.5	0.1	0.12	0.42	0.46	0.12	0.44	0.52	0.5	0.14	0.6	0.68	0.48	0.12	0.52	0.16	0.12	1.24	1.98
SWGCP_only_5000/SWlin2006.16676.cnf	0.12	0.26	0.04	0.06	0.14	0.14	0.06	0.14	0.2	0.2	0.06	0.24	0.36	0.22	0.04	0.22	0.12	0.06	0.36	0.42
SWGCP_only_5000/SWlin2006.16677.cnf	0.24	0.42	0.12	0.12	0.36	0.32	0.1	0.36	0.34	0.46	0.14	0.46	0.58	0.42	0.12	0.58	0.26	0.14	0.7	1.84
SWGCP_only_5000/SWlin2006.16678.cnf	0.22	0.28	0.1	0.12	0.34	0.36	0.14	0.34	0.4	0.4	0.12	0.54	0.34	0.34	0.1	0.38	0.22	0.12	0.74	1.88
SWGCP_only_5000/SWlin2006.16679.cnf	0.24	0.62	0.08	0.1	0.34	0.4	0.1	0.36	0.5	0.44	0.12	0.46	0.58	0.5	0.1	0.48	0.32	0.1	0.8	1.78
SWGCP_only_5000/SWlin2006.16680.cnf	0.2	0.28	0.08	0.1	0.36	0.3	0.1	0.3	0.26	0.34	0.12	0.5	0.38	0.32	0.1	0.4	0.2	0.1	0.74	1.32
SWGCP_only_5000/SWlin2006.16681.cnf	0.02	0.0	0.02	0.04	0.0	0.0	0.02	0.0	0.0	0.08	0.06	0.04	0.02	0.02	0.02	0.02	0.0	0.08	0.02	0.46
SWGCP_only_5000/SWlin2006.16682.cnf	0.26	0.68	0.1	0.1	0.48	0.36	0.12	0.38	0.56	0.46	0.16	0.78	0.48	0.74	0.12	0.6	0.3	0.12	0.92	2.02
SWGCP_only_5000/SWlin2006.16683.cnf	0.06	0.12	0.06	0.08	0.06	0.34	0.1	0.28	0.04	0.32	0.1	0.5	0.16	0.44	0.06	0.44	0.26	0.06	0.62	1.18
SWGCP_only_5000/SWlin2006.16684.cnf	0.12	0.26	0.06	0.06	0.2	0.16	0.08	0.18	0.22	0.2	0.08	0.32	0.32	0.3	0.08	0.26	0.14	0.04	0.42	0.56
SWGCP_only_5000/SWlin2006.16685.cnf	0.22	0.16	0.1	0.12	0.42	0.38	0.12	0.34	0.4	0.36	0.12	0.14	0.78	0.54	0.12	0.12	0.32	0.1	0.72	1.52
SWGCP_only_5000/SWlin2006.16686.cnf	0.16	0.3	0.06	0.06	0.22	0.22	0.08	0.18	0.16	0.22	0.08	0.32	0.36	0.3	0.06	0.24	0.18	0.1	0.42	0.68
SWGCP_only_5000/SWlin2006.16687.cnf	0.22	0.74	0.08	0.08	0.1	0.34	0.1	0.28	0.38	0.32	0.12	0.54	0.3	0.14	0.1	0.42	0.14	0.1	0.66	1.24
SWGCP_only_5000/SWlin2006.16688.cnf	0.16	0.46	0.06	0.06	0.24	0.22	0.08	0.2	0.34	0.2	0.08	0.42	0.42	0.4	0.06	0.26	0.18	0.1	0.5	0.78
SWGCP_only_5000/SWlin2006.16689.cnf	0.28	0.66	0.1	0.1	0.44	0.42	0.12	0.44	0.32	0.36	0.14	0.58	1.16	0.5	0.1	0.54	0.28	0.12	1.04	1.86
SWGCP_only_5000/SWlin2006.16690.cnf	0.06	0.0	0.06	0.06	0.04	0.16	0.08	0.0	0.0	0.04	0.06	0.28	0.02	0.26	0.06	0.02	0.02	0.08	0.38	0.52
SWGCP_only_5000/SWlin2006.16691.cnf	0.12	0.34	0.04	0.06	0.16	0.14	0.06	0.16	0.22	0.18	0.04	0.28	0.42	0.26	0.06	0.2	0.14	0.08	0.38	0.5
SWGCP_only_5000/SWlin2006.16692.cnf	0.2	0.54	0.12	0.1	0.38	0.32	0.12	0.2	0.12	0.44	0.12	0.46	0.34	0.08	0.1	0.44	0.3	0.1	0.5	1.54
SWGCP_only_5000/SWlin2006.16693.cnf	0.2	0.02	0.08	0.08	0.3	0.34	0.1	0.3	0.4	0.36	0.1	0.56	0.56	0.52	0.08	0.46	0.24	0.1	0.1	1.16
SWGCP_only_5000/SWlin2006.16694.cnf	0.3	0.14	0.1	0.1	0.36	0.48	0.12	0.36	0.5	0.5	0.12	0.5	1.1	0.6	0.12	0.68	0.12	0.1	0.72	1.74
SWGCP_only_5000/SWlin2006.16695.cnf	0.16	1.02	0.1	0.12	0.52	0.44	0.12	0.42	0.36	0.5	0.14	0.58	0.78	0.58	0.12	0.46	0.28	0.14	1.06	1.92
SWGCP_only_5000/SWlin2006.16696.cnf	0.18	0.54	0.08	0.1	0.06	0.06	0.08	0.28	0.38	0.32	0.1	0.42	0.68	0.06	0.04	0.38	0.24	0.06	0.48	0.98
SWGCP_only_5000/SWlin2006.16697.cnf	0.14	0.18	0.06	0.06	0.26	0.1	0.06	0.06	0.36	0.24	0.1	0.44	0.62	0.02	0.08	0.08	0.18	0.06	0.58	0.82
SWGCP_only_5000/SWlin2006.16698.cnf	0.12	0.38	0.06	0.06	0.24	0.2	0.08	0.2	0.3	0.22	0.06	0.34	0.48	0.3	0.04	0.28	0.16	0.08	0.48	0.68
SWGCP_only_5000/SWlin2006.16699.cnf	0.24	0.44	0.1	0.12	0.32	0.32	0.12	0.34	0.32	0.36	0.12	0.54	0.36	0.36	0.1	0.38	0.22	0.1	0.72	1.58
SWGCP_only_5000/SWlin2006.16700.cnf	0.16	0.42	0.06	0.06	0.24	0.22	0.06	0.2	0.26	0.22	0.08	0.3	0.48	0.3	0.04	0.24	0.16	0.06	0.52	0.68
SWGCP_only_5000/SWlin2006.16701.cnf	0.16	0.12	0.06	0.08	0.06	0.28	0.08	0.02	0.32	0.24	0.06	0.42	0.08	0.2	0.08	0.34	0.08	0.08	0.16	0.82
SWGCP_only_5000/SWlin2006.16702.cnf	0.14	0.26	0.06	0.08	0.2	0.18	0.06	0.18	0.22	0.2	0.06	0.28	0.3	0.24	0.08	0.24	0.14	0.06	0.38	0.62
SWGCP_only_5000/SWlin2006.16703.cnf	0.22	0.04	0.06	0.1	0.18	0.18	0.08	0.26	0.42	0.32	0.1	0.54	0.62	0.46	0.08	0.4	0.24	0.08	0.8	1.08
SWGCP_only_5000/SWlin2006.16704.cnf	0.12	0.24	0.06	0.06	0.2	0.18	0.06	0.16	0.2	0.2	0.08	0.2	0.28	0.2	0.04	0.22	0.14	0.08	0.36	0.58
SWGCP_only_5000/SWlin2006.16705.cnf	0.28	0.68	0.12	0.1	0.48	0.4	0.14	0.3	0.46	0.4	0.16	0.52	0.56	0.5	0.12	0.52	0.36	0.12	1.0	2.0
SWGCP_only_5000/SWlin2006.16706.cnf	0.12	0.34	0.04	0.06	0.24	0.18	0.06	0.18	0.28	0.22	0.08	0.32	0.36	0.3	0.06	0.26	0.16	0.08	0.36	0.66
SWGCP_only_5000/SWlin2006.16707.cnf	0.2	0.42	0.1	0.1	0.34	0.28	0.1	0.28	0.26	0.3	0.12	0.46	0.74	0.38	0.1	0.44	0.2	0.1	0.72	1.36
SWGCP_only_5000/SWlin2006.16708.cnf	0.2	0.1	0.08	0.1	0.3	0.34	0.1	0.34	0.34	0.34	0.12	0.58	0.5	0.2	0.1	0.4	0.3	0.1	0.68	1.42
SWGCP_only_5000/SWlin2006.16709.cnf	0.24	0.68	0.08	0.1	0.42	0.4	0.1	0.38	0.44	0.4	0.1	0.62	0.7	0.54	0.1	0.52	0.26	0.1	0.54	1.52
SWGCP_only_5000/SWlin2006.16710.cnf	0.12	0.0	0.06	0.06	0.22	0.22	0.08	0.2	0.32	0.18	0.1	0.28	0.36	0.1	0.04	0.18	0.08	0.08	0.1	0.66
SWGCP_only_5000/SWlin2006.16711.cnf	0.2	0.14	0.06	0.06	0.18	0.3	0.08	0.28	0.4	0.2	0.1	0.42	0.7	0.32	0.1	0.32	0.24	0.08	0.78	1.14
SWGCP_only_5000/SWlin2006.16712.cnf	0.14	0.26	0.04	0.06	0.02	0.02	0.06	0.16	0.22	0.18	0.08	0.3	0.02	0.02	0.06	0.24	0.16	0.08	0.38	0.58
SWGCP_only_5000/SWlin2006.16713.cnf	0.14	0.4	0.06	0.06	0.22	0.22	0.08	0.16	0.24	0.24	0.08	0.32	0.48	0.3	0.06	0.3	0.16	0.08	0.36	0.66
SWGCP_only_5000/SWlin2006.16714.cnf	0.28	0.72	0.12	0.12	0.5	0.44	0.14	0.36	0.52	0.22	0.14	0.52	0.5	0.5	0.1	0.54	0.34	0.12	0.82	1.9
SWGCP_only_5000/SWlin2006.16715.cnf	0.22	0.36	0.1	0.08	0.32	0.28	0.1	0.24	0.34	0.34	0.08	0.54	0.72	0.32	0.08	0.4	0.26	0.08	0.7	1.28
SWGCP_only_5000/SWlin2006.16716.cnf	0.26	0.64	0.1	0.1	0.42	0.4	0.12	0.32	0.48	0.44	0.12	0.68	0.6	0.54	0.1	0.46	0.28	0.08	0.82	1.64
SWGCP_only_5000/SWlin2006.16717.cnf	0.2	0.6	0.06	0.1	0.3	0.36	0.1	0.3	0.4	0.32	0.1	0.46	0.52	0.4	0.1	0.38	0.22	0.1	0.74	1.28
SWGCP_only_5000/SWlin2006.16718.cnf	0.22	0.64	0.08	0.08	0.34	0.32	0.1	0.28	0.34	0.36	0.1	0.48	0.62	0.5	0.08	0.46	0.28	0.1	0.7	1.24
SWGCP_only_5000/SWlin2006.16719.cnf	0.22	0.06	0.08	0.08	0.36	0.18	0.1	0.32	0.46	0.12	0.12	0.52	0.12	0.26	0.08	0.1	0.28	0.08	0.88	1.24
SWGCP_only_5000/SWlin2006.16720.cnf	0.2	0.56	0.08	0.1	0.34	0.3	0.1	0.36	0.46	0.38	0.1	0.54	0.8	0.52	0.1	0.44	0.24	0.1	0.64	1.26
SWGCP_only_5000/SWlin2006.16721.cnf	0.26	0.58	0.1	0.1	0.46	0.46	0.14	0.38	0.44	0.38	0.14	0.42	0.54	0.4	0.12	0.62	0.28	0.12	0.78	1.84
SWGCP_only_5000/SWlin2006.16722.cnf	0.2	0.56	0.06	0.06	0.26	0.3	0.08	0.24	0.38	0.26	0.1	0.2	0.46	0.08	0.08	0.38	0.2	0.08	0.52	0.94
SWGCP_only_5000/SWlin2006.16723.cnf	0.12	0.34	0.06	0.04	0.18	0.18	0.06	0.14	0.22	0.2	0.06	0.26	0.32	0.24	0.06	0.24	0.12	0.06	0.36	0.52
SWGCP_only_5000/SWlin2006.16724.cnf	0.14	0.2	0.08	0.06	0.14	0.14	0.06	0.12	0.16	0.14	0.04	0.2	0.22	0.18	0.06	0.16	0.1	0.06	0.28	0.44
SWGCP_only_5000/SWlin2006.16725.cnf	0.22	0.56	0.08	0.08	0.1	0.34	0.1	0.32	0.48	0.14	0.12	0.2	0.8	0.18	0.08	0.48	0.26	0.1	0.94	1.4
SWGCP_only_5000/SWlin2006.16726.cnf	0.06	0.06	0.06	0.06	0.28	0.28	0.06	0.22	0.26	0.32	0.06	0.06	0.4	0.02	0.08	0.32	0.1	0.06	0.1	0.88
SWGCP_only_5000/SWlin2006.16727.cnf	0.18	0.02	0.08	0.08	0.28	0.26	0.08	0.22	0.34	0.3	0.08	0.44	0.08	0.3	0.08	0.32	0.18	0.08	0.66	0.92
SWGCP_only_5000/SWlin2006.16728.cnf	0.12	0.16	0.04	0.06	0.04	0.02	0.06	0.08	0.28	0.22	0.08	0.1	0.06	0.28	0.06	0.0	0.0	0.06	0.1	0.64
SWGCP_only_5000/SWlin2006.16729.cnf	0.2	0.2	0.08	0.1	0.26	0.3	0.1	0.28	0.24	0.28	0.12	0.42	0.3	0.22	0.08	0.36	0.18	0.1	0.56	1.38
SWGCP_only_5000/SWlin2006.16730.cnf	0.3	0.48	0.1	0.12	0.4	0.38	0.14	0.4	0.42	0.42	0.14	0.46	0.82	0.42	0.14	0.54	0.24	0.1	0.82	1.92
SWGCP_only_5000/SWlin2006.16731.cnf	0.2	0.56	0.08	0.1	0.44	0.4	0.1	0.34	0.5	0.38	0.1	0.52	0.58	0.44	0.1	0.48	0.32	0.1	0.66	1.5
SWGCP_only_5000/SWlin2006.16732.cnf	0.14	0.46	0.06	0.06	0.26	0.24	0.08	0.2	0.28	0.3	0.08	0.38	0.56	0.36	0.08	0.28	0.18	0.1	0.52	0.78
SWGCP_only_5000/SWlin2006.16733.cnf	0.04	0.56	0.06	0.06	0.28	0.26	0.08	0.08	0.16	0.3	0.08	0.44	0.52	0.02	0.06	0.36	0.08	0.08	0.62	0.88
SWGCP_only_5000/SWlin2006.16734.cnf	0.2	0.06	0.08	0.06	0.3	0.32	0.08	0.28	0.42	0.34	0.1	0.52	0.68	0.4	0.08	0.4	0.22	0.1	0.64	1.04
SWGCP_only_5000/SWlin2006.16735.cnf	0.22	0.74	0.08	0.1	0.32	0.36	0.1	0.4	0.46	0.4	0.14	0.54	0.94	0.1	0.08	0.48	0.16	0.1	0.6	1.48
SWGCP_only_5000/SWlin2006.16736.cnf	0.28	0.52	0.08	0.1	0.44	0.4	0.12	0.3	0.06	0.28	0.1	0.58	0.9	0.44	0.08	0.52	0.24	0.1	0.86	1.64
SWGCP_only_5000/SWlin2006.16737.cnf	0.24	0.26	0.12	0.1	0.36	0.36	0.12	0.32	0.42	0.46	0.14	0.4	0.4	0.32	0.1	0.44	0.22	0.12	0.72	1.8
SWGCP_only_5000/SWlin2006.16738.cnf	0.18	0.08	0.08	0.08	0.28	0.02	0.06	0.16	0.06	0.04	0.1	0.06	0.06	0.42	0.08	0.18	0.2	0.08	0.14	0.86
SWGCP_only_5000/SWlin2006.16739.cnf	0.1	0.14	0.04	0.02	0.16	0.14	0.06	0.16	0.16	0.16	0.06	0.24	0.16	0.16	0.04	0.2	0.1	0.08	0.36	0.46
SWGCP_only_5000/SWlin2006.16740.cnf	0.24	0.72	0.08	0.08	0.34	0.32	0.08	0.32	0.52	0.42	0.12	0.58	0.8	0.4	0.08	0.42	0.24	0.1	0.7	1.3
SWGCP_only_5000/SWlin2006.16741.cnf	0.02	0.0	0.04	0.06	0.02	0.02	0.06	0.18	0.0	0.2	0.06	0.02	0.02	0.0	0.04	0.24	0.0	0.06	0.02	0.56
SWGCP_only_5000/SWlin2006.16742.cnf	0.26	0.5	0.1	0.14	0.5	0.44	0.14	0.46	0.62	0.54	0.14	0.54	0.8	0.54	0.1	0.68	0.28	0.12	1.02	1.96
SWGCP_only_5000/SWlin2006.16743.cnf	0.18	0.52	0.08	0.08	0.32	0.26	0.1	0.26	0.42	0.28	0.1	0.38	0.7	0.36	0.08	0.4	0.22	0.08	0.58	0.98
SWGCP_only_5000/SWlin2006.16744.cnf	0.22	0.5	0.08	0.08	0.32	0.32	0.12	0.28	0.32	0.34	0.12	0.48	0.6	0.38	0.08	0.38	0.24	0.1	0.54	1.22
SWGCP_only_5000/SWlin2006.16745.cnf	0.14	0.32	0.06	0.04	0.18	0.18	0.06	0.16	0.26	0.18	0.08	0.26	0.38	0.28	0.06	0.24	0.14	0.06	0.4	0.54
SWGCP_only_5000/SWlin2006.16746.cnf	0.12	0.32	0.06	0.04	0.18	0.18	0.06	0.16	0.24	0.2	0.08	0.26	0.38	0.24	0.06	0.2	0.14	0.08	0.38	0.48
SWGCP_only_5000/SWlin2006.16747.cnf	0.24	0.66	0.1	0.14	0.46	0.4	0.12	0.3	0.58	0.46	0.14	0.78	0.76	0.42	0.1	0.54	0.36	0.12	0.78	1.78
SWGCP_only_5000/SWlin2006.16748.cnf	0.2	0.44	0.06	0.1	0.28	0.22	0.1	0.28	0.34	0.3	0.1	0.38	0.7	0.34	0.1	0.32	0.24	0.08	0.58	1.2
SWGCP_only_5000/SWlin2006.16749.cnf	0.26	0.2	0.1	0.1	0.46	0.38	0.14	0.34	0.5	0.38	0.14	0.62	0.68	0.52	0.1	0.6	0.32	0.12	0.86	1.8
SWGCP_only_5000/SWlin2006.16750.cnf	0.2	0.4	0.06	0.08	0.18	0.36	0.1	0.3	0.38	0.36	0.12	0.38	0.54	0.5	0.1	0.42	0.24	0.08	0.74	1.26
SWGCP_only_5000/SWlin2006.16751.cnf	0.16	0.2	0.08	0.08	0.28	0.26	0.08	0.24	0.22	0.3	0.1	0.34	0.24	0.22	0.08	0.34	0.16	0.1	0.48	1.08
SWGCP_only_5000/SWlin2006.16752.cnf	0.14	0.3	0.04	0.06	0.24	0.16	0.08	0.16	0.0	0.22	0.06	0.32	0.46	0.3	0.04	0.28	0.02	0.08	0.46	0.62
SWGCP_only_5000/SWlin2006.16753.cnf	0.28	0.58	0.1	0.12	0.48	0.2	0.12	0.44	0.5	0.48	0.12	0.62	0.9	0.78	0.1	0.56	0.26	0.12	0.68	1.9
SWGCP_only_5000/SWlin2006.16754.cnf	0.2	0.66	0.1	0.08	0.36	0.38	0.1	0.34	0.44	0.46	0.1	0.54	0.74	0.48	0.08	0.4	0.28	0.12	0.78	1.54
SWGCP_only_5000/SWlin2006.16755.cnf	0.2	0.5	0.04	0.06	0.26	0.24	0.08	0.04	0.38	0.28	0.08	0.06	0.52	0.34	0.08	0.34	0.18	0.08	0.52	0.82
SWGCP_only_5000/SWlin2006.16756.cnf	0.16	0.34	0.06	0.06	0.28	0.26	0.1	0.26	0.32	0.3	0.08	0.44	0.6	0.36	0.08	0.34	0.2	0.06	0.64	0.92
SWGCP_only_5000/SWlin2006.16757.cnf	0.24	0.68	0.1	0.1	0.4	0.26	0.08	0.36	0.24	0.44	0.1	0.6	0.2	0.46	0.1	0.48	0.2	0.12	0.68	1.36
SWGCP_only_5000/SWlin2006.16758.cnf	0.18	0.66	0.08	0.08	0.32	0.28	0.08	0.24	0.38	0.32	0.1	0.2	0.68	0.46	0.1	0.38	0.04	0.08	0.76	1.02
SWGCP_only_5000/SWlin2006.16759.cnf	0.2	0.26	0.08	0.08	0.08	0.32	0.06	0.26	0.4	0.3	0.1	0.5	0.44	0.18	0.08	0.4	0.22	0.08	0.64	1.08
SWGCP_only_5000/SWlin2006.16760.cnf	0.24	0.46	0.1	0.14	0.38	0.48	0.12	0.36	0.44	0.44	0.12	0.76	0.74	0.38	0.12	0.42	0.32	0.14	0.78	1.94
SWGCP_only_5000/SWlin2006.16761.cnf	0.06	0.06	0.04	0.06	0.24	0.02	0.08	0.04	0.02	0.08	0.08	0.08	0.1	0.08	0.06	0.02	0.02	0.08	0.04	0.72
SWGCP_only_5000/SWlin2006.16762.cnf	0.18	0.38	0.08	0.08	0.26	0.3	0.12	0.26	0.24	0.26	0.1	0.36	0.34	0.36	0.1	0.34	0.2	0.1	0.56	1.28
SWGCP_only_5000/SWlin2006.16763.cnf	0.16	0.02	0.06	0.08	0.1	0.24	0.08	0.12	0.04	0.28	0.1	0.12	0.54	0.42	0.08	0.06	0.14	0.1	0.06	0.84
SWGCP_only_5000/SWlin2006.16764.cnf	0.24	0.68	0.08	0.12	0.48	0.4	0.1	0.4	0.62	0.38	0.14	0.76	0.84	0.54	0.12	0.54	0.28	0.12	0.74	1.74
SWGCP_only_5000/SWlin2006.16765.cnf	0.22	0.7	0.1	0.1	0.42	0.4	0.1	0.38	0.46	0.36	0.12	0.56	0.68	0.5	0.08	0.4	0.26	0.1	0.84	1.5
SWGCP_only_5000/SWlin2006.16766.cnf	0.22	0.66	0.08	0.06	0.3	0.32	0.1	0.26	0.34	0.36	0.14	0.48	0.78	0.36	0.08	0.42	0.24	0.1	0.58	1.24
SWGCP_only_5000/SWlin2006.16767.cnf	0.12	0.26	0.02	0.06	0.16	0.18	0.08	0.16	0.18	0.2	0.08	0.26	0.32	0.24	0.06	0.2	0.14	0.06	0.34	0.6
SWGCP_only_5000/SWlin2006.16768.cnf	0.28	0.62	0.08	0.06	0.36	0.32	0.14	0.36	0.4	0.42	0.1	0.58	0.74	0.48	0.1	0.56	0.32	0.12	0.86	1.54
SWGCP_only_5000/SWlin2006.16769.cnf	0.18	0.5	0.06	0.04	0.06	0.24	0.08	0.24	0.28	0.28	0.08	0.1	0.04	0.34	0.06	0.36	0.22	0.08	0.12	0.84
SWGCP_only_5000/SWlin2006.16770.cnf	0.28	0.54	0.1	0.12	0.4	0.46	0.12	0.34	0.54	0.42	0.12	0.52	0.58	0.5	0.12	0.6	0.24	0.12	0.78	1.84
SWGCP_only_5000/SWlin2006.16771.cnf	0.12	0.86	0.08	0.1	0.38	0.44	0.12	0.4	0.4	0.42	0.12	0.56	0.48	0.64	0.12	0.44	0.28	0.12	0.9	1.74
SWGCP_only_5000/SWlin2006.16772.cnf	0.12	0.34	0.06	0.06	0.16	0.16	0.04	0.16	0.24	0.18	0.08	0.3	0.3	0.28	0.04	0.22	0.16	0.08	0.4	0.52
SWGCP_only_5000/SWlin2006.16773.cnf	0.06	0.02	0.06	0.06	0.26	0.24	0.06	0.02	0.02	0.3	0.06	0.04	0.46	0.36	0.08	0.34	0.04	0.1	0.08	0.86
SWGCP_only_5000/SWlin2006.16774.cnf	0.3	0.98	0.12	0.12	0.5	0.38	0.14	0.36	0.56	0.44	0.12	0.8	0.7	0.4	0.12	0.4	0.34	0.1	1.02	1.9
SWGCP_only_5000/SWlin2006.16775.cnf	0.28	1.0	0.12	0.12	0.38	0.54	0.12	0.4	0.56	0.38	0.14	0.38	0.66	0.44	0.1	0.5	0.38	0.1	0.76	1.94
SWGCP_only_5000/SWlin2006.16776.cnf	0.18	0.22	0.08	0.08	0.24	0.24	0.08	0.22	0.24	0.26	0.08	0.34	0.32	0.24	0.08	0.3	0.18	0.1	0.56	0.94
SWGCP_only_5000/SWlin2006.16777.cnf	0.14	0.34	0.06	0.08	0.24	0.22	0.08	0.18	0.24	0.24	0.06	0.32	0.42	0.28	0.08	0.28	0.18	0.08	0.46	0.74
SWGCP_only_5000/SWlin2006.16778.cnf	0.12	0.12	0.1	0.12	0.42	0.4	0.12	0.36	0.62	0.4	0.14	0.66	0.64	0.26	0.08	0.58	0.3	0.12	0.92	1.8
SWGCP_only_5000/SWlin2006.16779.cnf	0.12	0.28	0.06	0.06	0.18	0.14	0.06	0.14	0.22	0.16	0.04	0.2	0.32	0.22	0.06	0.2	0.12	0.08	0.34	0.44
SWGCP_only_5000/SWlin2006.16780.cnf	0.2	0.46	0.1	0.08	0.3	0.28	0.1	0.3	0.36	0.1	0.1	0.42	0.66	0.48	0.08	0.4	0.26	0.1	0.1	1.18
SWGCP_only_5000/SWlin2006.16781.cnf	0.22	0.6	0.08	0.08	0.12	0.34	0.12	0.28	0.42	0.36	0.08	0.52	0.06	0.42	0.08	0.38	0.24	0.1	0.72	1.16
SWGCP_only_5000/SWlin2006.16782.cnf	0.14	0.32	0.06	0.08	0.16	0.14	0.06	0.14	0.22	0.2	0.06	0.26	0.4	0.24	0.06	0.2	0.16	0.1	0.36	0.5
SWGCP_only_5000/SWlin2006.16783.cnf	0.08	0.12	0.08	0.08	0.32	0.04	0.1	0.26	0.08	0.32	0.08	0.14	0.06	0.32	0.08	0.34	0.2	0.08	0.56	0.94
SWGCP_only_5000/SWlin2006.16784.cnf	0.18	0.3	0.1	0.1	0.32	0.28	0.1	0.26	0.28	0.3	0.1	0.46	0.42	0.3	0.1	0.36	0.22	0.1	0.6	1.4
SWGCP_only_5000/SWlin2006.16785.cnf	0.16	0.46	0.06	0.08	0.24	0.24	0.08	0.18	0.28	0.26	0.08	0.38	0.54	0.36	0.08	0.32	0.18	0.08	0.54	0.78
SWGCP_only_5000/SWlin2006.16786.cnf	0.04	0.3	0.04	0.04	0.12	0.18	0.06	0.0	0.0	0.2	0.08	0.04	0.16	0.24	0.06	0.04	0.12	0.04	0.38	0.48
SWGCP_only_5000/SWlin2006.16787.cnf	0.22	0.3	0.12	0.12	0.32	0.38	0.12	0.32	0.36	0.32	0.12	0.62	0.34	0.28	0.12	0.48	0.22	0.1	0.86	1.68
SWGCP_only_5000/SWlin2006.16788.cnf	0.26	0.68	0.12	0.12	0.2	0.44	0.14	0.38	0.42	0.54	0.12	0.66	0.4	0.42	0.12	0.64	0.2	0.12	0.76	1.84
SWGCP_only_5000/SWlin2006.16789.cnf	0.26	0.54	0.08	0.08	0.38	0.32	0.1	0.3	0.46	0.32	0.1	0.5	0.5	0.38	0.06	0.52	0.24	0.1	0.76	1.28
SWGCP_only_5000/SWlin2006.16790.cnf	0.24	0.5	0.08	0.1	0.38	0.36	0.12	0.16	0.54	0.44	0.12	0.66	0.68	0.56	0.08	0.52	0.3	0.12	0.7	1.46
SWGCP_only_5000/SWlin2006.16791.cnf	0.1	0.24	0.04	0.06	0.18	0.18	0.06	0.16	0.14	0.2	0.08	0.3	0.42	0.24	0.06	0.22	0.14	0.08	0.42	0.52
SWGCP_only_5000/SWlin2006.16792.cnf	0.24	0.7	0.08	0.1	0.34	0.38	0.1	0.36	0.42	0.12	0.12	0.62	0.18	0.44	0.12	0.46	0.28	0.1	0.74	1.42
SWGCP_only_5000/SWlin2006.16793.cnf	0.24	0.44	0.08	0.12	0.4	0.38	0.12	0.4	0.62	0.42	0.12	0.58	0.5	0.42	0.1	0.46	0.26	0.12	0.78	1.88
SWGCP_only_5000/SWlin2006.16794.cnf	0.16	0.28	0.06	0.08	0.28	0.28	0.08	0.26	0.32	0.28	0.1	0.36	0.44	0.28	0.08	0.36	0.18	0.1	0.7	1.12
SWGCP_only_5000/SWlin2006.16795.cnf	0.18	0.56	0.06	0.06	0.26	0.26	0.08	0.26	0.4	0.28	0.08	0.44	0.66	0.3	0.08	0.32	0.22	0.08	0.62	0.86
SWGCP_only_5000/SWlin2006.16796.cnf	0.18	0.36	0.06	0.1	0.28	0.26	0.1	0.24	0.32	0.3	0.1	0.36	0.5	0.32	0.08	0.38	0.22	0.1	0.6	1.12
SWGCP_only_5000/SWlin2006.16797.cnf	0.24	0.82	0.1	0.1	0.44	0.4	0.14	0.38	0.42	0.46	0.12	0.5	0.6	0.66	0.12	0.48	0.28	0.12	0.94	1.78
SWGCP_only_5000/SWlin2006.16798.cnf	0.18	0.6	0.1	0.06	0.3	0.38	0.1	0.3	0.32	0.3	0.1	0.46	0.54	0.42	0.08	0.44	0.28	0.06	0.6	1.3
SWGCP_only_5000/SWlin2006.16799.cnf	0.16	0.38	0.04	0.08	0.22	0.2	0.06	0.2	0.3	0.24	0.08	0.36	0.46	0.32	0.06	0.28	0.14	0.08	0.5	0.72
SWGCP_only_5000/SWlin2006.16800.cnf	0.16	0.78	0.08	0.12	0.46	0.32	0.12	0.36	0.48	0.5	0.12	0.54	0.22	0.16	0.12	0.48	0.32	0.12	0.88	1.64
SWGCP_only_5000/SWlin2006.16801.cnf	0.14	0.04	0.04	0.06	0.24	0.24	0.08	0.08	0.04	0.26	0.08	0.38	0.2	0.36	0.06	0.32	0.06	0.08	0.54	0.72
SWGCP_only_5000/SWlin2006.16802.cnf	0.1	0.2	0.04	0.06	0.16	0.16	0.08	0.16	0.18	0.16	0.06	0.22	0.3	0.22	0.04	0.18	0.14	0.08	0.32	0.48
SWGCP_only_5000/SWlin2006.16803.cnf	0.22	0.24	0.1	0.12	0.4	0.36	0.1	0.38	0.14	0.38	0.14	0.66	0.42	0.5	0.1	0.54	0.26	0.12	0.66	1.56
SWGCP_only_5000/SWlin2006.16804.cnf	0.08	0.04	0.06	0.08	0.32	0.28	0.08	0.06	0.12	0.32	0.1	0.24	0.52	0.48	0.08	0.42	0.24	0.08	0.58	1.12
SWGCP_only_5000/SWlin2006.16805.cnf	0.02	0.44	0.06	0.06	0.02	0.12	0.06	0.02	0.02	0.06	0.06	0.02	0.12	0.02	0.02	0.1	0.0	0.06	0.06	0.64
SWGCP_only_5000/SWlin2006.16806.cnf	0.2	0.62	0.1	0.06	0.2	0.34	0.08	0.3	0.48	0.36	0.1	0.54	0.8	0.54	0.06	0.36	0.26	0.1	0.12	1.16
SWGCP_only_5000/SWlin2006.16807.cnf	0.12	0.0	0.06	0.06	0.0	0.0	0.04	0.16	0.0	0.04	0.06	0.04	0.34	0.24	0.06	0.02	0.04	0.08	0.38	0.52
SWGCP_only_5000/SWlin2006.16808.cnf	0.08	0.04	0.06	0.06	0.24	0.12	0.08	0.16	0.1	0.02	0.06	0.26	0.08	0.02	0.04	0.28	0.02	0.06	0.54	0.72
SWGCP_only_5000/SWlin2006.16809.cnf	0.18	0.26	0.08	0.08	0.28	0.3	0.1	0.3	0.32	0.3	0.12	0.46	0.34	0.26	0.1	0.38	0.16	0.1	0.64	1.42
SWGCP_only_5000/SWlin2006.16810.cnf	0.26	0.56	0.12	0.12	0.34	0.38	0.14	0.42	0.44	0.34	0.12	0.52	0.7	0.54	0.1	0.62	0.3	0.12	0.76	2.0
SWGCP_only_5000/SWlin2006.16811.cnf	0.16	0.66	0.1	0.08	0.54	0.36	0.14	0.36	0.54	0.44	0.14	0.6	0.28	0.58	0.1	0.6	0.24	0.1	1.32	1.9
SWGCP_only_5000/SWlin2006.16812.cnf	0.28	0.64	0.1	0.1	0.42	0.4	0.12	0.34	0.5	0.38	0.12	0.5	0.78	0.58	0.1	0.58	0.3	0.12	0.86	1.86
SWGCP_only_5000/SWlin2006.16813.cnf	0.06	0.08	0.08	0.08	0.26	0.24	0.06	0.2	0.12	0.04	0.08	0.32	0.06	0.02	0.0	0.1	0.14	0.08	0.12	0.78
SWGCP_only_5000/SWlin2006.16814.cnf	0.28	0.16	0.1	0.12	0.44	0.5	0.14	0.42	0.44	0.42	0.12	0.66	1.08	0.74	0.14	0.58	0.34	0.12	0.72	1.94
SWGCP_only_5000/SWlin2006.16815.cnf	0.12	0.14	0.08	0.04	0.16	0.16	0.06	0.14	0.14	0.16	0.04	0.24	0.16	0.14	0.06	0.2	0.1	0.06	0.3	0.46
SWGCP_only_5000/SWlin2006.16816.cnf	0.16	0.82	0.1	0.12	0.14	0.46	0.14	0.44	0.36	0.44	0.12	0.46	0.9	0.7	0.1	0.5	0.34	0.12	0.9	1.82
SWGCP_only_5000/SWlin2006.16817.cnf	0.06	0.5	0.06	0.06	0.1	0.24	0.06	0.22	0.02	0.28	0.06	0.18	0.56	0.02	0.06	0.12	0.18	0.08	0.58	0.78
SWGCP_only_5000/SWlin2006.16818.cnf	0.14	0.36	0.08	0.06	0.24	0.2	0.08	0.18	0.28	0.24	0.1	0.34	0.4	0.3	0.04	0.28	0.18	0.08	0.46	0.68
SWGCP_only_5000/SWlin2006.16819.cnf	0.2	0.2	0.1	0.08	0.32	0.08	0.1	0.28	0.12	0.36	0.12	0.18	0.82	0.04	0.1	0.1	0.28	0.1	0.68	1.16
SWGCP_only_5000/SWlin2006.16820.cnf	0.26	0.38	0.08	0.12	0.36	0.4	0.12	0.36	0.42	0.34	0.1	0.56	0.7	0.48	0.1	0.52	0.28	0.1	0.74	1.68
SWGCP_only_5000/SWlin2006.16821.cnf	0.26	0.46	0.1	0.12	0.44	0.38	0.12	0.36	0.6	0.38	0.12	0.56	0.66	0.62	0.1	0.5	0.26	0.1	0.98	1.86
SWGCP_only_5000/SWlin2006.16822.cnf	0.16	0.52	0.06	0.08	0.28	0.24	0.08	0.24	0.06	0.22	0.08	0.06	0.12	0.4	0.08	0.32	0.1	0.08	0.58	0.84
SWGCP_only_5000/SWlin2006.16823.cnf	0.24	0.86	0.1	0.12	0.5	0.5	0.14	0.46	0.68	0.52	0.14	0.5	0.88	0.6	0.12	0.54	0.34	0.1	0.88	1.94
SWGCP_only_5000/SWlin2006.16824.cnf	0.14	0.32	0.06	0.06	0.22	0.22	0.08	0.22	0.3	0.24	0.1	0.36	0.52	0.3	0.08	0.32	0.2	0.08	0.52	0.84
SWGCP_only_5000/SWlin2006.16825.cnf	0.2	0.58	0.08	0.1	0.22	0.28	0.08	0.28	0.46	0.38	0.12	0.12	0.86	0.28	0.08	0.46	0.22	0.1	0.8	1.14
SWGCP_only_5000/SWlin2006.16826.cnf	0.22	0.32	0.12	0.12	0.4	0.4	0.12	0.46	0.38	0.46	0.12	0.52	0.28	0.32	0.12	0.54	0.2	0.1	0.84	1.96
SWGCP_only_5000/SWlin2006.16827.cnf	0.18	0.5	0.06	0.08	0.28	0.26	0.08	0.24	0.36	0.32	0.08	0.38	0.5	0.34	0.06	0.38	0.16	0.1	0.68	0.86
SWGCP_only_5000/SWlin2006.16828.cnf	0.18	0.2	0.08	0.06	0.22	0.2	0.06	0.18	0.3	0.24	0.08	0.32	0.52	0.34	0.06	0.3	0.18	0.08	0.04	0.7
SWGCP_only_5000/SWlin2006.16829.cnf	0.14	0.38	0.04	0.06	0.22	0.2	0.06	0.18	0.26	0.2	0.08	0.32	0.42	0.32	0.08	0.24	0.14	0.08	0.48	0.66
SWGCP_only_5000/SWlin2006.16830.cnf	0.24	0.4	0.08	0.08	0.32	0.3	0.1	0.3	0.28	0.32	0.1	0.4	0.54	0.48	0.1	0.42	0.22	0.08	0.74	1.36
SWGCP_only_5000/SWlin2006.16831.cnf	0.24	0.64	0.08	0.08	0.4	0.38	0.1	0.3	0.36	0.32	0.12	0.5	0.76	0.46	0.1	0.44	0.28	0.1	1.02	1.5
SWGCP_only_5000/SWlin2006.16832.cnf	0.14	0.24	0.04	0.04	0.16	0.14	0.06	0.14	0.14	0.14	0.08	0.22	0.3	0.2	0.06	0.16	0.12	0.08	0.28	0.42
SWGCP_only_5000/SWlin2006.16833.cnf	0.16	0.58	0.08	0.08	0.3	0.26	0.1	0.14	0.32	0.34	0.1	0.42	0.7	0.5	0.06	0.32	0.18	0.08	0.54	1.06
SWGCP_only_5000/SWlin2006.16834.cnf	0.14	0.38	0.04	0.06	0.22	0.2	0.08	0.18	0.22	0.22	0.08	0.28	0.48	0.28	0.08	0.28	0.14	0.06	0.46	0.64
SWGCP_only_5000/SWlin2006.16835.cnf	0.28	0.46	0.1	0.12	0.36	0.44	0.12	0.36	0.3	0.52	0.16	0.54	1.0	0.4	0.12	0.5	0.28	0.12	0.76	1.98
SWGCP_only_5000/SWlin2006.16836.cnf	0.28	0.44	0.12	0.12	0.38	0.48	0.14	0.38	0.42	0.44	0.12	0.7	0.58	0.58	0.1	0.54	0.3	0.14	0.68	2.0
SWGCP_only_5000/SWlin2006.16837.cnf	0.22	0.46	0.1	0.1	0.34	0.42	0.12	0.36	0.5	0.38	0.1	0.6	0.34	0.48	0.1	0.46	0.32	0.1	0.7	1.5
SWGCP_only_5000/SWlin2006.16838.cnf	0.24	0.36	0.06	0.1	0.34	0.36	0.1	0.32	0.38	0.34	0.12	0.4	0.74	0.36	0.08	0.42	0.2	0.1	0.86	1.5
SWGCP_only_5000/SWlin2006.16839.cnf	0.18	0.22	0.08	0.08	0.32	0.3	0.1	0.26	0.24	0.32	0.1	0.42	0.26	0.26	0.08	0.38	0.2	0.1	0.6	1.36
SWGCP_only_5000/SWlin2006.16840.cnf	0.24	0.5	0.08	0.08	0.34	0.4	0.12	0.38	0.56	0.42	0.12	0.58	0.56	0.44	0.1	0.42	0.28	0.1	0.86	1.56
SWGCP_only_5000/SWlin2006.16841.cnf	0.18	0.18	0.08	0.06	0.26	0.28	0.1	0.24	0.38	0.28	0.08	0.1	0.08	0.34	0.08	0.14	0.18	0.1	0.1	1.04
SWGCP_only_5000/SWlin2006.16842.cnf	0.2	0.48	0.08	0.1	0.3	0.3	0.08	0.3	0.48	0.34	0.1	0.38	0.54	0.36	0.08	0.44	0.22	0.08	0.62	1.32
SWGCP_only_5000/SWlin2006.16843.cnf	0.2	0.64	0.1	0.1	0.4	0.3	0.12	0.14	0.56	0.16	0.12	0.6	0.76	0.62	0.1	0.54	0.28	0.08	0.94	1.6
SWGCP_only_5000/SWlin2006.16844.cnf	0.18	0.48	0.08	0.08	0.3	0.28	0.08	0.28	0.34	0.28	0.1	0.42	0.22	0.04	0.08	0.12	0.1	0.1	0.74	1.04
SWGCP_only_5000/SWlin2006.16845.cnf	0.22	0.62	0.1	0.1	0.38	0.4	0.1	0.36	0.24	0.44	0.12	0.6	0.64	0.44	0.08	0.52	0.24	0.08	0.82	1.52
SWGCP_only_5000/SWlin2006.16846.cnf	0.2	0.42	0.1	0.12	0.32	0.36	0.1	0.28	0.4	0.42	0.12	0.46	0.58	0.52	0.12	0.5	0.28	0.1	1.1	1.7
SWGCP_only_5000/SWlin2006.16847.cnf	0.22	0.6	0.08	0.1	0.34	0.36	0.1	0.28	0.5	0.38	0.1	0.56	0.7	0.46	0.1	0.4	0.24	0.1	0.64	1.32
SWGCP_only_5000/SWlin2006.16848.cnf	0.24	0.16	0.1	0.08	0.34	0.36	0.1	0.3	0.28	0.24	0.1	0.54	0.68	0.14	0.08	0.36	0.22	0.1	0.42	1.28
SWGCP_only_5000/SWlin2006.16849.cnf	0.2	0.42	0.08	0.1	0.36	0.32	0.1	0.3	0.36	0.34	0.08	0.38	0.58	0.4	0.08	0.4	0.24	0.12	0.7	1.32
SWGCP_only_5000/SWlin2006.16850.cnf	0.12	0.32	0.04	0.04	0.2	0.18	0.06	0.14	0.24	0.2	0.08	0.28	0.4	0.28	0.04	0.24	0.14	0.08	0.4	0.5
SWGCP_only_5000/SWlin2006.16851.cnf	0.24	0.14	0.08	0.1	0.38	0.34	0.1	0.34	0.42	0.28	0.1	0.24	0.78	0.2	0.1	0.52	0.16	0.08	0.5	1.42
SWGCP_only_5000/SWlin2006.16852.cnf	0.18	0.54	0.08	0.06	0.06	0.18	0.08	0.26	0.36	0.1	0.1	0.46	0.14	0.02	0.1	0.4	0.22	0.08	0.56	0.92
SWGCP_only_5000/SWlin2006.16853.cnf	0.16	0.38	0.06	0.08	0.26	0.22	0.08	0.22	0.36	0.24	0.1	0.44	0.46	0.32	0.08	0.28	0.18	0.08	0.48	0.94
SWGCP_only_5000/SWlin2006.16854.cnf	0.18	0.36	0.08	0.1	0.36	0.32	0.1	0.3	0.38	0.28	0.12	0.5	0.48	0.3	0.1	0.5	0.22	0.1	0.7	1.64
SWGCP_only_5000/SWlin2006.16855.cnf	0.18	0.28	0.08	0.08	0.32	0.28	0.12	0.26	0.24	0.32	0.1	0.4	0.3	0.3	0.08	0.32	0.2	0.1	0.78	1.18
SWGCP_only_5000/SWlin2006.16856.cnf	0.12	0.2	0.06	0.08	0.18	0.16	0.06	0.16	0.16	0.16	0.06	0.24	0.28	0.18	0.06	0.22	0.12	0.08	0.36	0.58
SWGCP_only_5000/SWlin2006.16857.cnf	0.28	0.62	0.1	0.14	0.3	0.42	0.14	0.46	0.58	0.44	0.12	0.52	0.8	0.22	0.14	0.28	0.24	0.12	0.68	1.98
SWGCP_only_5000/SWlin2006.16858.cnf	0.28	0.5	0.1	0.12	0.46	0.48	0.12	0.38	0.68	0.44	0.12	0.62	1.1	0.7	0.12	0.18	0.26	0.12	0.94	1.82
SWGCP_only_5000/SWlin2006.16859.cnf	0.1	0.22	0.06	0.08	0.16	0.16	0.06	0.12	0.18	0.14	0.06	0.2	0.24	0.18	0.04	0.18	0.12	0.06	0.3	0.44
SWGCP_only_5000/SWlin2006.16860.cnf	0.08	0.02	0.08	0.06	0.12	0.0	0.06	0.06	0.04	0.22	0.08	0.08	0.04	0.02	0.06	0.02	0.02	0.08	0.1	0.7
SWGCP_only_5000/SWlin2006.16861.cnf	0.28	0.8	0.1	0.1	0.36	0.42	0.1	0.34	0.6	0.44	0.14	0.52	0.78	0.1	0.1	0.62	0.3	0.1	0.5	1.76
SWGCP_only_5000/SWlin2006.16862.cnf	0.1	0.18	0.04	0.06	0.16	0.16	0.04	0.14	0.16	0.14	0.06	0.2	0.2	0.16	0.06	0.18	0.1	0.08	0.3	0.5
SWGCP_only_5000/SWlin2006.16863.cnf	0.26	0.68	0.1	0.1	0.44	0.38	0.12	0.38	0.3	0.24	0.14	0.22	0.7	0.66	0.1	0.36	0.3	0.12	0.84	1.62
SWGCP_only_5000/SWlin2006.16864.cnf	0.24	0.4	0.12	0.08	0.34	0.44	0.08	0.36	0.46	0.4	0.12	0.6	0.92	0.5	0.1	0.48	0.28	0.1	0.7	1.56
SWGCP_only_5000/SWlin2006.16865.cnf	0.24	0.58	0.1	0.1	0.38	0.12	0.12	0.34	0.44	0.34	0.12	0.48	0.34	0.48	0.08	0.4	0.32	0.12	0.98	1.5
SWGCP_only_5000/SWlin2006.16866.cnf	0.12	0.36	0.1	0.12	0.52	0.44	0.14	0.42	0.6	0.48	0.12	0.6	0.2	0.7	0.08	0.56	0.16	0.1	0.98	1.88
SWGCP_only_5000/SWlin2006.16867.cnf	0.18	0.14	0.08	0.08	0.28	0.28	0.08	0.24	0.36	0.28	0.1	0.18	0.04	0.04	0.08	0.06	0.04	0.08	0.42	0.98
SWGCP_only_5000/SWlin2006.16868.cnf	0.14	0.04	0.08	0.08	0.06	0.28	0.06	0.26	0.42	0.06	0.1	0.08	0.7	0.04	0.06	0.2	0.16	0.08	0.5	1.0
SWGCP_only_5000/SWlin2006.16869.cnf	0.22	0.26	0.08	0.1	0.38	0.34	0.1	0.32	0.28	0.4	0.1	0.46	0.3	0.2	0.08	0.42	0.2	0.12	0.76	1.66
SWGCP_only_5000/SWlin2006.16870.cnf	0.04	0.06	0.06	0.06	0.18	0.0	0.08	0.08	0.0	0.0	0.08	0.3	0.42	0.0	0.06	0.06	0.12	0.06	0.38	0.58
SWGCP_only_5000/SWlin2006.16871.cnf	0.16	0.4	0.04	0.06	0.22	0.18	0.1	0.2	0.34	0.26	0.08	0.38	0.5	0.34	0.06	0.3	0.16	0.08	0.56	0.74
SWGCP_only_5000/SWlin2006.16872.cnf	0.16	0.38	0.06	0.08	0.24	0.22	0.04	0.22	0.26	0.24	0.08	0.34	0.38	0.34	0.08	0.32	0.16	0.08	0.42	0.76
SWGCP_only_5000/SWlin2006.16873.cnf	0.24	1.0	0.1	0.12	0.38	0.48	0.1	0.38	0.66	0.5	0.12	0.64	0.74	0.5	0.12	0.4	0.32	0.1	0.76	1.82
SWGCP_only_5000/SWlin2006.16874.cnf	0.2	0.08	0.08	0.08	0.32	0.26	0.1	0.08	0.14	0.3	0.08	0.06	0.52	0.04	0.08	0.28	0.26	0.08	0.68	1.16
SWGCP_only_5000/SWlin2006.16875.cnf	0.22	0.72	0.08	0.1	0.36	0.38	0.1	0.32	0.48	0.4	0.12	0.6	0.82	0.62	0.08	0.44	0.2	0.1	0.82	1.34
SWGCP_only_5000/SWlin2006.16876.cnf	0.26	0.38	0.1	0.12	0.46	0.42	0.12	0.12	0.48	0.34	0.14	0.64	1.04	0.42	0.12	0.52	0.32	0.12	0.78	1.76
SWGCP_only_5000/SWlin2006.16877.cnf	0.2	0.54	0.08	0.08	0.32	0.3	0.1	0.28	0.32	0.28	0.08	0.5	0.66	0.42	0.08	0.42	0.22	0.1	0.66	1.0
SWGCP_only_5000/SWlin2006.16878.cnf	0.16	0.48	0.06	0.08	0.22	0.24	0.08	0.2	0.26	0.24	0.08	0.34	0.38	0.28	0.06	0.28	0.14	0.08	0.58	0.8
SWGCP_only_5000/SWlin2006.16879.cnf	0.14	0.38	0.08	0.06	0.22	0.3	0.1	0.24	0.28	0.28	0.1	0.42	0.18	0.36	0.08	0.34	0.2	0.08	0.66	0.9
SWGCP_only_5000/SWlin2006.16880.cnf	0.12	0.38	0.06	0.06	0.24	0.2	0.08	0.2	0.26	0.18	0.06	0.3	0.46	0.24	0.08	0.22	0.16	0.08	0.46	0.62
SWGCP_only_5000/SWlin2006.16881.cnf	0.14	0.16	0.06	0.06	0.04	0.0	0.06	0.2	0.26	0.1	0.06	0.02	0.4	0.14	0.06	0.22	0.16	0.06	0.48	0.64
SWGCP_only_5000/SWlin2006.16882.cnf	0.18	0.16	0.06	0.06	0.24	0.22	0.06	0.24	0.26	0.1	0.12	0.4	0.62	0.38	0.08	0.38	0.14	0.08	0.68	0.88
SWGCP_only_5000/SWlin2006.16883.cnf	0.04	0.04	0.08	0.06	0.0	0.04	0.04	0.18	0.04	0.06	0.08	0.3	0.02	0.06	0.06	0.16	0.06	0.1	0.04	0.7
SWGCP_only_5000/SWlin2006.16884.cnf	0.28	0.4	0.1	0.12	0.36	0.32	0.12	0.34	0.34	0.48	0.14	0.56	0.72	0.58	0.1	0.66	0.26	0.14	0.7	1.84
SWGCP_only_5000/SWlin2006.16885.cnf	0.14	0.22	0.04	0.06	0.16	0.16	0.08	0.14	0.18	0.14	0.06	0.2	0.24	0.18	0.04	0.18	0.12	0.06	0.3	0.46
SWGCP_only_5000/SWlin2006.16886.cnf	0.22	0.6	0.08	0.06	0.3	0.34	0.12	0.32	0.42	0.1	0.12	0.52	0.12	0.1	0.1	0.46	0.12	0.12	0.8	1.34
SWGCP_only_5000/SWlin2006.16887.cnf	0.2	0.64	0.08	0.08	0.36	0.3	0.08	0.28	0.46	0.36	0.1	0.48	0.7	0.42	0.06	0.46	0.24	0.08	0.66	1.16
SWGCP_only_5000/SWlin2006.16888.cnf	0.14	0.24	0.06	0.04	0.16	0.16	0.08	0.16	0.2	0.16	0.08	0.24	0.3	0.22	0.04	0.18	0.14	0.06	0.34	0.54
SWGCP_only_5000/SWlin2006.16889.cnf	0.26	0.54	0.1	0.1	0.38	0.4	0.1	0.38	0.52	0.46	0.12	0.5	0.9	0.52	0.1	0.44	0.3	0.1	0.9	1.76
SWGCP_only_5000/SWlin2006.16890.cnf	0.18	0.52	0.08	0.06	0.28	0.26	0.08	0.26	0.36	0.26	0.08	0.42	0.6	0.38	0.08	0.36	0.22	0.08	0.64	0.9
SWGCP_only_5000/SWlin2006.16891.cnf	0.04	0.2	0.08	0.1	0.14	0.36	0.12	0.3	0.22	0.36	0.12	0.54	0.12	0.54	0.1	0.36	0.22	0.1	0.18	1.22
SWGCP_only_5000/SWlin2006.16892.cnf	0.16	0.28	0.06	0.08	0.3	0.26	0.12	0.24	0.26	0.26	0.1	0.44	0.4	0.3	0.08	0.34	0.22	0.08	0.5	1.22
SWGCP_only_5000/SWlin2006.16893.cnf	0.26	0.5	0.1	0.1	0.34	0.4	0.12	0.38	0.46	0.44	0.12	0.58	1.08	0.46	0.1	0.48	0.26	0.12	1.08	1.66
SWGCP_only_5000/SWlin2006.16894.cnf	0.22	0.62	0.06	0.08	0.36	0.32	0.08	0.34	0.42	0.34	0.1	0.48	0.74	0.52	0.08	0.24	0.16	0.1	0.78	1.28
SWGCP_only_5000/SWlin2006.16895.cnf	0.2	0.64	0.08	0.1	0.34	0.3	0.1	0.32	0.36	0.3	0.1	0.6	0.64	0.38	0.08	0.46	0.26	0.1	0.52	1.22
SWGCP_only_5000/SWlin2006.16896.cnf	0.3	0.76	0.12	0.12	0.38	0.4	0.14	0.44	0.38	0.44	0.14	0.56	0.6	0.32	0.12	0.52	0.36	0.1	0.94	1.96
SWGCP_only_5000/SWlin2006.16897.cnf	0.08	0.5	0.08	0.08	0.24	0.32	0.1	0.14	0.34	0.34	0.1	0.52	0.64	0.42	0.06	0.42	0.14	0.1	0.66	1.1
SWGCP_only_5000/SWlin2006.16898.cnf	0.26	0.54	0.08	0.08	0.34	0.34	0.1	0.34	0.48	0.38	0.08	0.44	0.48	0.5	0.08	0.38	0.22	0.08	0.82	1.2
SWGCP_only_5000/SWlin2006.16899.cnf	0.18	0.22	0.1	0.12	0.4	0.38	0.12	0.36	0.28	0.42	0.12	0.5	0.28	0.26	0.1	0.44	0.2	0.12	0.64	1.54
SWGCP_only_5000/SWlin2006.16900.cnf	0.22	0.4	0.1	0.1	0.36	0.4	0.12	0.32	0.32	0.26	0.1	0.44	0.7	0.5	0.1	0.52	0.24	0.1	0.84	1.54
SWGCP_only_5000/SWlin2006.16901.cnf	0.16	0.04	0.06	0.08	0.24	0.24	0.04	0.22	0.34	0.28	0.1	0.32	0.44	0.1	0.06	0.32	0.12	0.08	0.56	0.78
SWGCP_only_5000/SWlin2006.16902.cnf	0.14	0.3	0.08	0.04	0.16	0.16	0.06	0.16	0.2	0.16	0.04	0.26	0.34	0.24	0.04	0.2	0.14	0.08	0.36	0.46
SWGCP_only_5000/SWlin2006.16903.cnf	0.26	0.7	0.1	0.1	0.44	0.38	0.1	0.36	0.56	0.42	0.12	0.46	0.66	0.56	0.1	0.48	0.16	0.1	0.74	1.44
SWGCP_only_5000/SWlin2006.16904.cnf	0.22	0.1	0.1	0.1	0.44	0.34	0.12	0.34	0.04	0.42	0.12	0.66	0.22	0.48	0.1	0.54	0.1	0.1	0.76	1.48
SWGCP_only_5000/SWlin2006.16905.cnf	0.22	0.44	0.08	0.08	0.36	0.08	0.08	0.08	0.48	0.36	0.1	0.08	0.66	0.56	0.1	0.4	0.28	0.1	0.78	1.32
SWGCP_only_5000/SWlin2006.16906.cnf	0.24	0.52	0.1	0.12	0.4	0.38	0.1	0.36	0.44	0.38	0.1	0.42	0.58	0.44	0.1	0.36	0.24	0.12	0.78	1.56
SWGCP_only_5000/SWlin2006.16907.cnf	0.26	0.12	0.1	0.12	0.46	0.48	0.12	0.48	0.58	0.4	0.14	0.76	1.2	0.44	0.12	0.6	0.32	0.14	0.24	1.86
SWGCP_only_5000/SWlin2006.16908.cnf	0.3	0.52	0.1	0.12	0.48	0.36	0.14	0.42	0.48	0.38	0.14	0.6	0.86	0.52	0.1	0.5	0.3	0.12	0.68	1.98
SWGCP_only_5000/SWlin2006.16909.cnf	0.2	0.24	0.1	0.1	0.36	0.32	0.1	0.36	0.24	0.34	0.12	0.44	0.26	0.26	0.1	0.42	0.2	0.1	0.52	1.68
SWGCP_only_5000/SWlin2006.16910.cnf	0.22	0.06	0.06	0.08	0.2	0.32	0.1	0.24	0.06	0.34	0.1	0.44	0.72	0.48	0.08	0.36	0.24	0.08	0.74	1.08
SWGCP_only_5000/SWlin2006.16911.cnf	0.24	0.26	0.1	0.1	0.42	0.38	0.12	0.34	0.34	0.5	0.14	0.54	0.38	0.3	0.12	0.48	0.24	0.12	0.8	1.82
SWGCP_only_5000/SWlin2006.16912.cnf	0.28	0.36	0.1	0.12	0.48	0.42	0.14	0.42	0.46	0.44	0.14	0.46	1.1	0.46	0.12	0.56	0.3	0.1	0.84	1.94
SWGCP_only_5000/SWlin2006.16913.cnf	0.1	0.28	0.06	0.06	0.18	0.16	0.08	0.16	0.2	0.16	0.06	0.24	0.36	0.22	0.06	0.2	0.14	0.06	0.36	0.46
SWGCP_only_5000/SWlin2006.16914.cnf	0.22	0.56	0.1	0.1	0.36	0.3	0.08	0.32	0.5	0.36	0.12	0.44	0.54	0.4	0.1	0.46	0.26	0.08	0.76	1.3
SWGCP_only_5000/SWlin2006.16915.cnf	0.12	0.06	0.06	0.06	0.0	0.12	0.04	0.0	0.04	0.0	0.08	0.02	0.02	0.0	0.04	0.12	0.04	0.06	0.0	0.48
SWGCP_only_5000/SWlin2006.16916.cnf	0.18	0.04	0.08	0.08	0.34	0.34	0.08	0.3	0.46	0.28	0.08	0.1	0.68	0.48	0.1	0.42	0.24	0.1	0.66	1.1
SWGCP_only_5000/SWlin2006.16917.cnf	0.32	0.7	0.12	0.1	0.46	0.44	0.14	0.38	0.52	0.5	0.14	0.74	0.5	0.7	0.12	0.68	0.32	0.12	1.16	1.94
SWGCP_only_5000/SWlin2006.16918.cnf	0.2	0.6	0.08	0.06	0.38	0.36	0.12	0.12	0.4	0.36	0.12	0.52	0.42	0.6	0.08	0.08	0.28	0.1	0.9	1.32
SWGCP_only_5000/SWlin2006.16919.cnf	0.2	0.32	0.06	0.08	0.3	0.04	0.1	0.04	0.38	0.08	0.08	0.06	0.46	0.06	0.06	0.36	0.22	0.08	0.26	0.94
SWGCP_only_5000/SWlin2006.16920.cnf	0.22	0.26	0.1	0.12	0.36	0.42	0.14	0.38	0.26	0.44	0.1	0.44	0.38	0.32	0.12	0.48	0.24	0.12	0.84	1.94
SWGCP_only_5000/SWlin2006.16921.cnf	0.24	0.7	0.08	0.1	0.44	0.4	0.12	0.36	0.46	0.38	0.14	0.6	0.8	0.46	0.1	0.54	0.24	0.1	1.02	1.68
SWGCP_only_5000/SWlin2006.16922.cnf	0.2	0.46	0.08	0.08	0.34	0.3	0.1	0.26	0.42	0.34	0.08	0.44	0.84	0.38	0.08	0.44	0.24	0.1	0.62	1.1
SWGCP_only_5000/SWlin2006.16923.cnf	0.16	0.06	0.08	0.08	0.22	0.22	0.06	0.22	0.3	0.22	0.06	0.12	0.02	0.24	0.06	0.32	0.18	0.08	0.46	0.78
SWGCP_only_5000/SWlin2006.16924.cnf	0.18	0.34	0.06	0.06	0.28	0.24	0.08	0.22	0.38	0.26	0.08	0.46	0.04	0.06	0.08	0.38	0.22	0.1	0.56	0.9
SWGCP_only_5000/SWlin2006.16925.cnf	0.26	0.9	0.1	0.14	0.4	0.4	0.14	0.42	0.44	0.34	0.12	0.72	0.48	0.42	0.1	0.56	0.28	0.12	0.84	1.9
SWGCP_only_5000/SWlin2006.16926.cnf	0.24	0.22	0.1	0.08	0.36	0.32	0.1	0.24	0.38	0.36	0.12	0.54	0.64	0.5	0.1	0.46	0.16	0.12	0.72	1.42
SWGCP_only_5000/SWlin2006.16927.cnf	0.28	0.62	0.1	0.12	0.4	0.36	0.12	0.4	0.58	0.18	0.12	0.48	0.76	0.8	0.12	0.56	0.3	0.12	1.04	1.94
SWGCP_only_5000/SWlin2006.16928.cnf	0.14	0.32	0.06	0.06	0.16	0.04	0.1	0.04	0.04	0.1	0.06	0.04	0.62	0.36	0.06	0.34	0.02	0.1	0.52	0.8
SWGCP_only_5000/SWlin2006.16929.cnf	0.16	0.42	0.06	0.04	0.18	0.22	0.08	0.2	0.32	0.22	0.08	0.36	0.52	0.32	0.04	0.3	0.18	0.08	0.52	0.7
SWGCP_only_5000/SWlin2006.16930.cnf	0.26	0.62	0.1	0.1	0.44	0.38	0.1	0.4	0.58	0.14	0.12	0.62	0.94	0.52	0.1	0.6	0.28	0.1	0.96	1.6
SWGCP_only_5000/SWlin2006.16931.cnf	0.22	0.28	0.1	0.1	0.34	0.3	0.1	0.3	0.42	0.4	0.1	0.46	0.42	0.32	0.08	0.44	0.22	0.1	0.6	1.46
SWGCP_only_5000/SWlin2006.16932.cnf	0.2	0.54	0.06	0.1	0.34	0.3	0.1	0.24	0.4	0.3	0.1	0.48	0.66	0.4	0.08	0.42	0.24	0.1	0.64	1.06
SWGCP_only_5000/SWlin2006.16933.cnf	0.24	0.62	0.08	0.1	0.44	0.36	0.14	0.36	0.52	0.38	0.12	0.52	0.72	0.52	0.1	0.42	0.34	0.1	0.7	1.66
SWGCP_only_5000/SWlin2006.16934.cnf	0.16	0.02	0.04	0.06	0.24	0.22	0.08	0.2	0.32	0.28	0.08	0.38	0.06	0.4	0.04	0.28	0.12	0.08	0.5	0.8
SWGCP_only_5000/SWlin2006.16935.cnf	0.16	0.48	0.06	0.06	0.22	0.22	0.08	0.2	0.32	0.24	0.08	0.34	0.52	0.34	0.08	0.3	0.16	0.06	0.56	0.72
SWGCP_only_5000/SWlin2006.16936.cnf	0.24	0.68	0.1	0.1	0.4	0.38	0.1	0.4	0.4	0.4	0.12	0.52	0.74	0.6	0.08	0.52	0.34	0.1	0.72	1.68
SWGCP_only_5000/SWlin2006.16937.cnf	0.18	0.26	0.08	0.08	0.32	0.34	0.08	0.28	0.28	0.36	0.12	0.48	0.26	0.26	0.1	0.44	0.18	0.12	0.76	1.32
SWGCP_only_5000/SWlin2006.16938.cnf	0.06	0.12	0.08	0.06	0.24	0.24	0.1	0.2	0.1	0.14	0.1	0.18	0.02	0.4	0.06	0.22	0.18	0.08	0.56	0.76
SWGCP_only_5000/SWlin2006.16939.cnf	0.24	0.38	0.08	0.08	0.42	0.44	0.12	0.26	0.64	0.32	0.12	0.34	0.84	0.58	0.12	0.5	0.34	0.12	0.94	1.64
SWGCP_only_5000/SWlin2006.16940.cnf	0.14	0.34	0.04	0.04	0.18	0.18	0.08	0.16	0.26	0.2	0.08	0.3	0.42	0.24	0.06	0.22	0.16	0.06	0.44	0.58
SWGCP_only_5000/SWlin2006.16941.cnf	0.1	0.14	0.06	0.08	0.26	0.28	0.08	0.08	0.36	0.28	0.08	0.02	0.08	0.4	0.06	0.16	0.06	0.1	0.52	0.92
SWGCP_only_5000/SWlin2006.16942.cnf	0.24	0.84	0.1	0.1	0.36	0.38	0.1	0.38	0.54	0.48	0.12	0.3	0.18	0.08	0.1	0.58	0.3	0.1	0.88	1.7
SWGCP_only_5000/SWlin2006.16943.cnf	0.26	0.64	0.1	0.1	0.44	0.38	0.12	0.4	0.38	0.46	0.14	0.6	0.82	0.04	0.12	0.54	0.32	0.12	0.72	1.78
SWGCP_only_5000/SWlin2006.16944.cnf	0.24	0.74	0.1	0.1	0.42	0.38	0.12	0.4	0.5	0.34	0.12	0.6	0.7	0.36	0.1	0.28	0.28	0.1	0.26	1.62
SWGCP_only_5000/SWlin2006.16945.cnf	0.12	0.68	0.1	0.1	0.44	0.34	0.12	0.44	0.52	0.5	0.12	0.56	0.7	0.46	0.1	0.46	0.32	0.1	0.92	1.72
SWGCP_only_5000/SWlin2006.16946.cnf	0.12	0.34	0.06	0.06	0.16	0.18	0.06	0.16	0.18	0.2	0.08	0.24	0.38	0.26	0.06	0.18	0.12	0.08	0.34	0.54
SWGCP_only_5000/SWlin2006.16947.cnf	0.18	0.46	0.08	0.06	0.28	0.3	0.08	0.28	0.44	0.04	0.12	0.44	0.68	0.42	0.08	0.12	0.24	0.12	0.66	1.02
SWGCP_only_5000/SWlin2006.16948.cnf	0.24	0.06	0.08	0.08	0.42	0.34	0.1	0.34	0.28	0.36	0.12	0.5	0.44	0.56	0.08	0.48	0.3	0.12	0.64	1.5
SWGCP_only_5000/SWlin2006.16949.cnf	0.2	0.72	0.1	0.06	0.38	0.34	0.08	0.32	0.4	0.38	0.12	0.58	0.12	0.54	0.1	0.3	0.08	0.1	0.56	1.24
SWGCP_only_5000/SWlin2006.16950.cnf	0.2	0.48	0.1	0.1	0.34	0.36	0.14	0.36	0.4	0.38	0.12	0.48	0.52	0.5	0.1	0.42	0.28	0.1	0.76	1.52
SWGCP_only_5000/SWlin2006.16951.cnf	0.22	0.06	0.08	0.08	0.24	0.22	0.1	0.34	0.54	0.34	0.12	0.44	0.58	0.6	0.1	0.52	0.12	0.1	0.6	1.4
SWGCP_only_5000/SWlin2006.16952.cnf	0.14	0.44	0.06	0.08	0.24	0.26	0.06	0.08	0.04	0.28	0.1	0.38	0.06	0.14	0.08	0.22	0.22	0.1	0.58	0.82
SWGCP_only_5000/SWlin2006.16953.cnf	0.24	0.48	0.08	0.08	0.36	0.34	0.1	0.32	0.54	0.38	0.12	0.46	0.58	0.62	0.1	0.48	0.34	0.12	0.94	1.48
SWGCP_only_5000/SWlin2006.16954.cnf	0.2	0.54	0.12	0.1	0.4	0.34	0.12	0.34	0.36	0.42	0.14	0.56	0.64	0.44	0.1	0.52	0.3	0.1	0.54	1.8
SWGCP_only_5000/SWlin2006.16955.cnf	0.26	0.5	0.1	0.1	0.42	0.44	0.12	0.42	0.56	0.5	0.14	0.6	0.98	0.46	0.1	0.58	0.28	0.12	0.86	1.92
SWGCP_only_5000/SWlin2006.16956.cnf	0.18	0.16	0.06	0.06	0.26	0.24	0.08	0.2	0.28	0.26	0.1	0.08	0.04	0.32	0.06	0.02	0.2	0.08	0.56	0.82
SWGCP_only_5000/SWlin2006.16957.cnf	0.26	0.64	0.12	0.1	0.4	0.42	0.12	0.34	0.38	0.4	0.12	0.62	0.86	0.36	0.1	0.46	0.26	0.12	0.86	1.76
SWGCP_only_5000/SWlin2006.16958.cnf	0.28	0.38	0.1	0.12	0.42	0.4	0.14	0.34	0.36	0.38	0.12	0.5	0.54	0.46	0.12	0.48	0.24	0.12	0.66	2.0
SWGCP_only_5000/SWlin2006.16959.cnf	0.24	0.44	0.1	0.1	0.4	0.42	0.12	0.36	0.42	0.48	0.16	0.48	0.58	0.36	0.12	0.62	0.28	0.12	0.76	1.88
SWGCP_only_5000/SWlin2006.16960.cnf	0.2	0.48	0.06	0.1	0.3	0.32	0.12	0.1	0.28	0.32	0.08	0.44	0.7	0.52	0.08	0.4	0.22	0.1	0.54	1.24
SWGCP_only_5000/SWlin2006.16961.cnf	0.24	0.64	0.1	0.1	0.46	0.46	0.12	0.38	0.46	0.48	0.12	0.58	0.88	0.52	0.12	0.54	0.3	0.12	0.96	1.88
SWGCP_only_5000/SWlin2006.16962.cnf	0.22	0.42	0.06	0.1	0.32	0.28	0.1	0.28	0.38	0.3	0.1	0.54	0.76	0.44	0.08	0.44	0.26	0.08	0.8	1.18
SWGCP_only_5000/SWlin2006.16963.cnf	0.24	0.66	0.06	0.08	0.32	0.32	0.08	0.24	0.34	0.28	0.08	0.5	0.4	0.38	0.06	0.42	0.24	0.1	0.54	1.18
SWGCP_only_5000/SWlin2006.16964.cnf	0.18	0.4	0.06	0.06	0.24	0.26	0.06	0.24	0.3	0.26	0.08	0.44	0.42	0.46	0.08	0.32	0.2	0.1	0.56	0.92
SWGCP_only_5000/SWlin2006.16965.cnf	0.2	0.08	0.08	0.06	0.3	0.1	0.1	0.28	0.32	0.08	0.12	0.1	0.04	0.28	0.08	0.44	0.2	0.1	0.18	1.24
SWGCP_only_5000/SWlin2006.16966.cnf	0.14	0.4	0.06	0.08	0.04	0.22	0.08	0.14	0.02	0.02	0.08	0.06	0.02	0.06	0.08	0.3	0.06	0.08	0.06	0.76
SWGCP_only_5000/SWlin2006.16967.cnf	0.26	0.48	0.06	0.08	0.38	0.32	0.12	0.32	0.44	0.38	0.1	0.62	0.68	0.6	0.08	0.46	0.22	0.1	0.8	1.4
SWGCP_only_5000/SWlin2006.16968.cnf	0.22	0.56	0.08	0.08	0.3	0.32	0.08	0.26	0.34	0.38	0.12	0.42	0.76	0.46	0.1	0.42	0.22	0.1	0.76	1.1
SWGCP_only_5000/SWlin2006.16969.cnf	0.28	0.54	0.1	0.12	0.38	0.36	0.16	0.4	0.48	0.4	0.14	0.54	0.7	0.6	0.1	0.56	0.3	0.12	1.04	1.98
SWGCP_only_5000/SWlin2006.16970.cnf	0.22	0.48	0.12	0.1	0.32	0.34	0.1	0.3	0.48	0.38	0.1	0.4	0.8	0.36	0.1	0.5	0.26	0.12	0.64	1.54
SWGCP_only_5000/SWlin2006.16971.cnf	0.14	0.38	0.06	0.04	0.24	0.2	0.08	0.22	0.28	0.22	0.06	0.34	0.52	0.32	0.04	0.28	0.16	0.08	0.48	0.68
SWGCP_only_5000/SWlin2006.16972.cnf	0.18	0.46	0.08	0.08	0.26	0.28	0.08	0.24	0.42	0.32	0.1	0.42	0.38	0.42	0.06	0.42	0.12	0.08	0.54	1.1
SWGCP_only_5000/SWlin2006.16973.cnf	0.2	0.3	0.1	0.08	0.34	0.32	0.1	0.28	0.26	0.28	0.1	0.36	0.36	0.32	0.1	0.38	0.22	0.08	0.64	1.32
SWGCP_only_5000/SWlin2006.16974.cnf	0.22	0.72	0.08	0.1	0.34	0.38	0.08	0.08	0.12	0.4	0.1	0.48	0.76	0.34	0.08	0.5	0.16	0.1	0.84	1.3
SWGCP_only_5000/SWlin2006.16975.cnf	0.1	0.2	0.04	0.04	0.16	0.14	0.04	0.12	0.16	0.14	0.06	0.2	0.24	0.2	0.04	0.18	0.1	0.06	0.3	0.44
SWGCP_only_5000/SWlin2006.16976.cnf	0.22	0.68	0.12	0.08	0.42	0.38	0.14	0.32	0.6	0.36	0.14	0.72	0.98	0.46	0.14	0.46	0.3	0.12	0.68	1.9
SWGCP_only_5000/SWlin2006.16977.cnf	0.18	0.46	0.06	0.06	0.24	0.08	0.08	0.22	0.12	0.08	0.1	0.38	0.4	0.38	0.06	0.32	0.2	0.08	0.5	0.76
SWGCP_only_5000/SWlin2006.16978.cnf	0.28	0.8	0.08	0.12	0.48	0.4	0.14	0.32	0.36	0.44	0.12	0.5	1.2	0.54	0.1	0.54	0.3	0.12	0.84	1.82
SWGCP_only_5000/SWlin2006.16979.cnf	0.1	0.14	0.06	0.06	0.16	0.16	0.04	0.14	0.14	0.18	0.1	0.22	0.12	0.1	0.04	0.18	0.1	0.06	0.3	0.58
SWGCP_only_5000/SWlin2006.16980.cnf	0.1	0.16	0.04	0.06	0.16	0.14	0.06	0.14	0.16	0.12	0.08	0.22	0.24	0.16	0.04	0.16	0.1	0.04	0.26	0.42
SWGCP_only_5000/SWlin2006.16981.cnf	0.24	0.08	0.08	0.08	0.44	0.36	0.1	0.38	0.42	0.38	0.12	0.28	0.86	0.24	0.1	0.54	0.26	0.1	0.8	1.42
SWGCP_only_5000/SWlin2006.16982.cnf	0.16	0.18	0.06	0.06	0.28	0.26	0.08	0.26	0.26	0.28	0.08	0.38	0.26	0.22	0.08	0.36	0.14	0.08	0.5	0.92
SWGCP_only_5000/SWlin2006.16983.cnf	0.26	0.78	0.08	0.1	0.34	0.3	0.1	0.34	0.58	0.38	0.1	0.18	0.52	0.6	0.1	0.46	0.3	0.1	1.0	1.4
SWGCP_only_5000/SWlin2006.16984.cnf	0.04	0.32	0.06	0.06	0.2	0.02	0.06	0.06	0.26	0.16	0.08	0.3	0.0	0.0	0.08	0.04	0.04	0.08	0.42	0.58
SWGCP_only_5000/SWlin2006.16985.cnf	0.22	0.4	0.08	0.1	0.34	0.32	0.12	0.34	0.44	0.44	0.12	0.48	0.86	0.44	0.08	0.34	0.26	0.12	0.72	1.48
SWGCP_only_5000/SWlin2006.16986.cnf	0.16	0.22	0.08	0.08	0.26	0.28	0.06	0.26	0.24	0.28	0.08	0.42	0.26	0.24	0.08	0.34	0.14	0.08	0.48	0.98
SWGCP_only_5000/SWlin2006.16987.cnf	0.22	0.16	0.06	0.06	0.32	0.34	0.1	0.16	0.44	0.38	0.1	0.5	0.82	0.26	0.1	0.44	0.1	0.1	0.12	1.16
SWGCP_only_5000/SWlin2006.16988.cnf	0.2	0.42	0.1	0.1	0.4	0.14	0.12	0.34	0.52	0.44	0.1	0.5	0.24	0.14	0.1	0.46	0.3	0.1	0.98	1.42
SWGCP_only_5000/SWlin2006.16989.cnf	0.26	0.44	0.1	0.1	0.4	0.36	0.12	0.36	0.44	0.38	0.1	0.56	0.52	0.4	0.08	0.44	0.32	0.1	0.74	1.52
SWGCP_only_5000/SWlin2006.16990.cnf	0.18	0.34	0.08	0.06	0.22	0.24	0.06	0.18	0.28	0.24	0.06	0.36	0.44	0.2	0.04	0.3	0.18	0.06	0.46	0.8
SWGCP_only_5000/SWlin2006.16991.cnf	0.24	0.5	0.1	0.12	0.12	0.32	0.12	0.38	0.1	0.46	0.12	0.18	0.66	0.64	0.12	0.34	0.3	0.1	0.98	1.58
SWGCP_only_5000/SWlin2006.16992.cnf	0.12	0.72	0.1	0.08	0.42	0.36	0.1	0.36	0.08	0.4	0.12	0.52	0.06	0.44	0.1	0.42	0.26	0.1	0.76	1.36
SWGCP_only_5000/SWlin2006.16993.cnf	0.24	0.64	0.08	0.08	0.18	0.32	0.08	0.3	0.24	0.12	0.1	0.06	0.78	0.54	0.08	0.4	0.26	0.1	0.84	1.12
SWGCP_only_5000/SWlin2006.16994.cnf	0.24	0.36	0.12	0.12	0.4	0.36	0.12	0.36	0.38	0.36	0.12	0.46	0.58	0.46	0.1	0.4	0.28	0.12	0.9	1.98
SWGCP_only_5000/SWlin2006.16995.cnf	0.26	0.92	0.1	0.12	0.44	0.4	0.14	0.42	0.46	0.44	0.14	0.8	1.04	0.54	0.1	0.52	0.34	0.12	0.88	1.94
SWGCP_only_5000/SWlin2006.16996.cnf	0.1	0.22	0.06	0.04	0.14	0.14	0.06	0.12	0.16	0.16	0.06	0.22	0.28	0.18	0.06	0.18	0.12	0.08	0.28	0.44
SWGCP_only_5000/SWlin2006.16997.cnf	0.22	0.1	0.08	0.08	0.38	0.36	0.1	0.3	0.52	0.2	0.1	0.62	0.94	0.36	0.1	0.46	0.14	0.08	0.84	1.3
SWGCP_only_5000/SWlin2006.16998.cnf	0.26	0.48	0.1	0.1	0.44	0.46	0.14	0.4	0.58	0.36	0.14	0.52	0.64	0.56	0.12	0.58	0.36	0.1	0.68	1.86
SWGCP_only_5000/SWlin2006.16999.cnf	0.18	0.26	0.08	0.06	0.24	0.22	0.08	0.22	0.28	0.24	0.1	0.32	0.38	0.28	0.08	0.32	0.18	0.1	0.48	0.94
SWGCP_only_5000/SWlin2006.17000.cnf	0.16	0.32	0.04	0.06	0.22	0.2	0.06	0.2	0.26	0.22	0.06	0.28	0.34	0.26	0.06	0.22	0.16	0.08	0.46	0.68
SWGCP_only_5000/SWlin2006.17001.cnf	0.18	0.6	0.08	0.08	0.16	0.16	0.1	0.26	0.06	0.34	0.1	0.56	0.78	0.04	0.1	0.28	0.08	0.08	0.82	1.12
SWGCP_only_5000/SWlin2006.17002.cnf	0.18	0.22	0.08	0.08	0.32	0.3	0.08	0.26	0.22	0.34	0.08	0.36	0.26	0.18	0.08	0.38	0.16	0.1	0.62	1.08
SWGCP_only_5000/SWlin2006.17003.cnf	0.24	0.86	0.08	0.1	0.44	0.36	0.14	0.36	0.36	0.46	0.14	0.58	0.6	0.38	0.1	0.5	0.32	0.12	0.84	1.68
SWGCP_only_5000/SWlin2006.17004.cnf	0.2	0.44	0.06	0.1	0.34	0.3	0.08	0.2	0.36	0.32	0.1	0.46	0.52	0.02	0.08	0.4	0.22	0.08	0.2	1.06
SWGCP_only_5000/SWlin2006.17005.cnf	0.26	0.7	0.1	0.12	0.44	0.42	0.12	0.4	0.52	0.44	0.12	0.54	0.1	0.7	0.1	0.48	0.3	0.12	0.94	1.9
SWGCP_only_5000/SWlin2006.17006.cnf	0.14	0.28	0.04	0.06	0.2	0.18	0.08	0.16	0.24	0.18	0.06	0.28	0.28	0.2	0.08	0.24	0.16	0.06	0.38	0.64
SWGCP_only_5000/SWlin2006.17007.cnf	0.2	0.34	0.06	0.1	0.28	0.28	0.1	0.26	0.34	0.3	0.1	0.3	0.42	0.32	0.08	0.38	0.2	0.08	0.56	1.14
SWGCP_only_5000/SWlin2006.17008.cnf	0.16	0.78	0.1	0.1	0.4	0.38	0.12	0.3	0.52	0.44	0.14	0.54	0.62	0.46	0.06	0.54	0.26	0.1	0.64	1.6
SWGCP_only_5000/SWlin2006.17009.cnf	0.12	0.34	0.06	0.04	0.22	0.18	0.06	0.16	0.26	0.18	0.08	0.3	0.44	0.26	0.04	0.26	0.14	0.06	0.42	0.54
SWGCP_only_5000/SWlin2006.17010.cnf	0.22	0.62	0.08	0.08	0.36	0.32	0.1	0.28	0.34	0.34	0.1	0.54	0.74	0.4	0.1	0.4	0.24	0.12	0.58	1.14
SWGCP_only_5000/SWlin2006.17011.cnf	0.18	0.4	0.08	0.06	0.28	0.28	0.08	0.24	0.36	0.28	0.1	0.42	0.44	0.32	0.06	0.34	0.18	0.08	0.52	0.86
SWGCP_only_5000/SWlin2006.17012.cnf	0.2	0.28	0.08	0.12	0.36	0.34	0.12	0.34	0.28	0.38	0.12	0.54	0.34	0.32	0.1	0.42	0.24	0.1	0.74	1.62
SWGCP_only_5000/SWlin2006.17013.cnf	0.16	0.4	0.04	0.06	0.24	0.24	0.06	0.2	0.3	0.26	0.1	0.36	0.54	0.34	0.06	0.32	0.2	0.08	0.52	0.72
SWGCP_only_5000/SWlin2006.17014.cnf	0.24	0.68	0.1	0.1	0.4	0.34	0.12	0.34	0.42	0.38	0.12	0.54	0.8	0.44	0.1	0.56	0.26	0.1	0.62	1.6
SWGCP_only_5000/SWlin2006.17015.cnf	0.16	0.38	0.08	0.06	0.24	0.2	0.04	0.18	0.3	0.24	0.08	0.34	0.5	0.34	0.06	0.28	0.18	0.08	0.5	0.68
SWGCP_only_5000/SWlin2006.17016.cnf	0.12	0.14	0.06	0.04	0.16	0.14	0.06	0.14	0.14	0.16	0.06	0.24	0.16	0.14	0.06	0.18	0.08	0.06	0.3	0.42
SWGCP_only_5000/SWlin2006.17017.cnf	0.02	0.3	0.06	0.02	0.04	0.02	0.06	0.08	0.02	0.0	0.04	0.06	0.04	0.02	0.04	0.18	0.0	0.06	0.04	0.46
SWGCP_only_5000/SWlin2006.17018.cnf	0.18	0.48	0.1	0.12	0.42	0.24	0.1	0.32	0.4	0.36	0.1	0.48	0.66	0.56	0.1	0.52	0.26	0.1	0.78	1.52
SWGCP_only_5000/SWlin2006.17019.cnf	0.1	0.24	0.06	0.06	0.2	0.18	0.04	0.16	0.18	0.18	0.04	0.22	0.26	0.24	0.08	0.2	0.14	0.08	0.34	0.52
SWGCP_only_5000/SWlin2006.17020.cnf	0.22	0.6	0.1	0.12	0.34	0.4	0.1	0.36	0.12	0.12	0.1	0.6	0.34	0.56	0.08	0.52	0.34	0.12	0.72	1.6
SWGCP_only_5000/SWlin2006.17021.cnf	0.2	0.5	0.08	0.06	0.28	0.28	0.1	0.26	0.3	0.3	0.08	0.42	0.58	0.36	0.08	0.34	0.22	0.1	0.6	0.86
SWGCP_only_5000/SWlin2006.17022.cnf	0.24	0.4	0.12	0.12	0.34	0.34	0.14	0.38	0.38	0.34	0.12	0.6	0.64	0.54	0.12	0.44	0.26	0.12	0.78	1.7
SWGCP_only_5000/SWlin2006.17023.cnf	0.3	0.54	0.08	0.12	0.42	0.44	0.14	0.34	0.58	0.46	0.12	0.2	0.48	0.66	0.12	0.14	0.3	0.1	0.7	1.76
SWGCP_only_5000/SWlin2006.17024.cnf	0.24	0.66	0.08	0.08	0.34	0.04	0.12	0.32	0.38	0.22	0.14	0.46	0.88	0.16	0.1	0.52	0.24	0.12	0.94	1.36
SWGCP_only_5000/SWlin2006.17025.cnf	0.14	0.38	0.06	0.06	0.2	0.2	0.08	0.18	0.26	0.22	0.1	0.3	0.46	0.3	0.04	0.26	0.16	0.1	0.44	0.58
SWGCP_only_5000/SWlin2006.17026.cnf	0.22	0.64	0.08	0.08	0.44	0.32	0.12	0.32	0.56	0.3	0.14	0.14	0.8	0.48	0.1	0.48	0.26	0.12	0.88	1.62
SWGCP_only_5000/SWlin2006.17027.cnf	0.12	0.64	0.1	0.1	0.46	0.46	0.14	0.4	0.32	0.4	0.14	0.62	0.98	0.1	0.12	0.54	0.26	0.12	0.96	1.98
SWGCP_only_5000/SWlin2006.17028.cnf	0.24	0.68	0.08	0.08	0.36	0.16	0.14	0.36	0.5	0.38	0.12	0.6	0.9	0.34	0.08	0.4	0.26	0.12	0.72	1.54
SWGCP_only_5000/SWlin2006.17029.cnf	0.1	0.04	0.08	0.08	0.28	0.28	0.08	0.28	0.22	0.32	0.12	0.48	0.72	0.04	0.06	0.04	0.16	0.08	0.72	1.02
SWGCP_only_5000/SWlin2006.17030.cnf	0.22	0.7	0.06	0.06	0.28	0.28	0.1	0.32	0.38	0.08	0.1	0.52	0.58	0.56	0.08	0.38	0.22	0.08	0.62	1.2
SWGCP_only_5000/SWlin2006.17031.cnf	0.22	0.64	0.08	0.08	0.3	0.32	0.08	0.28	0.38	0.32	0.1	0.44	0.7	0.4	0.08	0.4	0.22	0.08	0.8	1.06
SWGCP_only_5000/SWlin2006.17032.cnf	0.2	0.42	0.1	0.1	0.34	0.34	0.12	0.34	0.36	0.34	0.12	0.6	0.4	0.4	0.1	0.44	0.26	0.12	0.56	1.42
SWGCP_only_5000/SWlin2006.17033.cnf	0.18	0.24	0.06	0.06	0.26	0.24	0.08	0.24	0.28	0.26	0.1	0.42	0.52	0.32	0.08	0.3	0.2	0.08	0.54	0.88
SWGCP_only_5000/SWlin2006.17034.cnf	0.24	0.66	0.08	0.1	0.46	0.38	0.12	0.34	0.48	0.4	0.12	0.58	0.76	0.5	0.08	0.54	0.28	0.1	0.82	1.76
SWGCP_only_5000/SWlin2006.17035.cnf	0.28	0.98	0.1	0.14	0.4	0.36	0.14	0.42	0.64	0.46	0.12	0.58	0.7	0.56	0.12	0.6	0.32	0.12	0.96	1.94
SWGCP_only_5000/SWlin2006.17036.cnf	0.24	0.88	0.1	0.1	0.4	0.34	0.12	0.08	0.42	0.4	0.14	0.62	0.06	0.42	0.12	0.5	0.32	0.1	0.84	1.72
SWGCP_only_5000/SWlin2006.17037.cnf	0.14	0.0	0.06	0.06	0.1	0.08	0.06	0.04	0.0	0.22	0.06	0.3	0.26	0.0	0.02	0.24	0.02	0.06	0.08	0.54
SWGCP_only_5000/SWlin2006.17038.cnf	0.12	0.04	0.06	0.06	0.2	0.2	0.04	0.2	0.02	0.06	0.06	0.3	0.16	0.08	0.06	0.3	0.04	0.08	0.44	0.7
SWGCP_only_5000/SWlin2006.17039.cnf	0.12	0.3	0.06	0.08	0.16	0.18	0.08	0.16	0.26	0.2	0.08	0.3	0.4	0.28	0.06	0.24	0.16	0.08	0.42	0.58
SWGCP_only_5000/SWlin2006.17040.cnf	0.24	0.68	0.08	0.08	0.36	0.36	0.1	0.34	0.52	0.36	0.1	0.52	0.68	0.52	0.1	0.52	0.24	0.1	0.68	1.44
SWGCP_only_5000/SWlin2006.17041.cnf	0.28	0.76	0.1	0.1	0.44	0.44	0.14	0.34	0.7	0.34	0.14	0.56	0.98	0.7	0.12	0.6	0.26	0.1	0.96	2.0
SWGCP_only_5000/SWlin2006.17042.cnf	0.32	0.72	0.12	0.14	0.5	0.46	0.14	0.46	0.62	0.42	0.12	0.64	0.54	0.6	0.12	0.54	0.28	0.12	0.88	2.0
SWGCP_only_5000/SWlin2006.17043.cnf	0.1	0.94	0.1	0.08	0.42	0.44	0.12	0.36	0.42	0.5	0.12	0.52	0.86	0.24	0.1	0.6	0.34	0.1	0.56	1.64
SWGCP_only_5000/SWlin2006.17044.cnf	0.22	0.28	0.08	0.1	0.34	0.38	0.1	0.38	0.34	0.38	0.12	0.58	0.36	0.32	0.1	0.44	0.2	0.1	0.84	1.62
SWGCP_only_5000/SWlin2006.17045.cnf	0.3	0.78	0.14	0.12	0.5	0.42	0.12	0.42	0.42	0.44	0.14	0.66	0.62	0.62	0.12	0.5	0.3	0.1	1.2	1.98
SWGCP_only_5000/SWlin2006.17046.cnf	0.08	0.08	0.06	0.06	0.24	0.26	0.08	0.24	0.06	0.26	0.08	0.16	0.6	0.34	0.06	0.34	0.14	0.1	0.56	0.84
SWGCP_only_5000/SWlin2006.17047.cnf	0.22	0.58	0.08	0.08	0.36	0.36	0.1	0.3	0.34	0.34	0.1	0.4	0.6	0.5	0.1	0.4	0.2	0.08	0.68	1.16
SWGCP_only_5000/SWlin2006.17048.cnf	0.14	0.04	0.04	0.06	0.02	0.24	0.06	0.1	0.04	0.04	0.08	0.38	0.38	0.02	0.04	0.02	0.16	0.06	0.08	0.72
SWGCP_only_5000/SWlin2006.17049.cnf	0.2	0.42	0.08	0.08	0.12	0.24	0.08	0.24	0.1	0.3	0.08	0.1	0.34	0.32	0.04	0.36	0.02	0.1	0.58	0.92
SWGCP_only_5000/SWlin2006.17050.cnf	0.16	0.5	0.08	0.1	0.32	0.36	0.1	0.32	0.46	0.32	0.1	0.08	0.54	0.04	0.1	0.32	0.24	0.1	0.64	1.2
SWGCP_only_5000/SWlin2006.17051.cnf	0.2	0.48	0.1	0.1	0.36	0.38	0.1	0.32	0.38	0.36	0.12	0.52	0.7	0.54	0.1	0.46	0.26	0.1	0.9	1.56
SWGCP_only_5000/SWlin2006.17052.cnf	0.2	0.28	0.06	0.1	0.08	0.32	0.12	0.26	0.42	0.36	0.1	0.2	0.6	0.46	0.08	0.4	0.24	0.1	0.28	1.1
SWGCP_only_5000/SWlin2006.17053.cnf	0.22	0.76	0.08	0.1	0.34	0.36	0.14	0.34	0.48	0.38	0.12	0.62	0.98	0.36	0.1	0.5	0.26	0.12	0.8	1.52
SWGCP_only_5000/SWlin2006.17054.cnf	0.22	0.36	0.1	0.08	0.42	0.44	0.12	0.4	0.2	0.36	0.12	0.42	1.08	0.68	0.1	0.46	0.3	0.12	0.86	1.56
SWGCP_only_5000/SWlin2006.17055.cnf	0.12	0.24	0.06	0.04	0.16	0.14	0.04	0.18	0.18	0.16	0.06	0.24	0.32	0.2	0.06	0.2	0.14	0.08	0.32	0.5
SWGCP_only_5000/SWlin2006.17056.cnf	0.12	0.2	0.06	0.08	0.24	0.04	0.1	0.16	0.06	0.06	0.1	0.06	0.06	0.42	0.06	0.34	0.18	0.1	0.64	0.9
SWGCP_only_5000/SWlin2006.17057.cnf	0.22	0.58	0.08	0.12	0.44	0.38	0.1	0.36	0.4	0.44	0.12	0.22	1.0	0.6	0.08	0.64	0.26	0.1	0.84	1.76
SWGCP_only_5000/SWlin2006.17058.cnf	0.22	0.66	0.06	0.1	0.34	0.34	0.12	0.28	0.48	0.38	0.1	0.5	0.3	0.34	0.08	0.44	0.24	0.12	0.76	1.28
SWGCP_only_5000/SWlin2006.17059.cnf	0.16	0.32	0.08	0.08	0.22	0.2	0.08	0.22	0.3	0.22	0.08	0.36	0.46	0.34	0.06	0.22	0.18	0.06	0.48	0.78
SWGCP_only_5000/SWlin2006.17060.cnf	0.26	0.74	0.1	0.12	0.48	0.44	0.1	0.42	0.52	0.42	0.12	0.66	0.72	0.58	0.1	0.46	0.26	0.14	0.9	1.9
SWGCP_only_5000/SWlin2006.17061.cnf	0.2	0.48	0.1	0.08	0.44	0.36	0.1	0.36	0.4	0.24	0.1	0.58	0.58	0.58	0.08	0.46	0.26	0.12	0.72	1.44
SWGCP_only_5000/SWlin2006.17062.cnf	0.12	0.28	0.06	0.06	0.22	0.22	0.06	0.16	0.3	0.22	0.08	0.32	0.52	0.32	0.04	0.28	0.16	0.08	0.5	0.66
SWGCP_only_5000/SWlin2006.17063.cnf	0.18	0.26	0.1	0.1	0.32	0.34	0.1	0.32	0.26	0.34	0.12	0.5	0.26	0.26	0.1	0.44	0.2	0.12	0.78	1.52
SWGCP_only_5000/SWlin2006.17064.cnf	0.2	0.62	0.08	0.06	0.32	0.36	0.08	0.28	0.28	0.3	0.1	0.42	0.66	0.42	0.1	0.4	0.22	0.1	0.64	1.22
SWGCP_only_5000/SWlin2006.17065.cnf	0.0	0.02	0.06	0.06	0.0	0.02	0.02	0.0	0.0	0.0	0.04	0.02	0.02	0.0	0.02	0.02	0.0	0.06	0.0	0.44
SWGCP_only_5000/SWlin2006.17066.cnf	0.24	0.44	0.08	0.08	0.36	0.28	0.12	0.28	0.36	0.38	0.12	0.6	0.94	0.48	0.1	0.46	0.26	0.1	0.88	1.46
SWGCP_only_5000/SWlin2006.17067.cnf	0.22	0.68	0.1	0.1	0.4	0.38	0.12	0.18	0.6	0.42	0.14	0.64	0.08	0.4	0.1	0.48	0.16	0.14	0.72	1.6
SWGCP_only_5000/SWlin2006.17068.cnf	0.1	0.2	0.04	0.08	0.16	0.14	0.08	0.14	0.2	0.18	0.06	0.28	0.28	0.2	0.08	0.22	0.14	0.06	0.34	0.54
SWGCP_only_5000/SWlin2006.17069.cnf	0.16	0.28	0.08	0.08	0.28	0.22	0.06	0.24	0.32	0.2	0.1	0.44	0.4	0.32	0.08	0.32	0.18	0.1	0.48	0.92
SWGCP_only_5000/SWlin2006.17070.cnf	0.22	0.2	0.08	0.08	0.36	0.28	0.1	0.28	0.5	0.1	0.1	0.58	0.56	0.12	0.06	0.38	0.08	0.08	0.82	1.22
SWGCP_only_5000/SWlin2006.17071.cnf	0.18	0.56	0.08	0.08	0.28	0.28	0.08	0.28	0.34	0.3	0.1	0.46	0.64	0.48	0.06	0.38	0.24	0.08	0.52	1.02
SWGCP_only_5000/SWlin2006.17072.cnf	0.14	0.0	0.06	0.06	0.1	0.0	0.08	0.18	0.04	0.0	0.08	0.02	0.14	0.0	0.04	0.1	0.12	0.06	0.08	0.6
SWGCP_only_5000/SWlin2006.17073.cnf	0.18	0.34	0.06	0.06	0.22	0.24	0.08	0.2	0.28	0.26	0.08	0.4	0.5	0.28	0.06	0.3	0.16	0.06	0.5	0.82
SWGCP_only_5000/SWlin2006.17074.cnf	0.18	0.04	0.06	0.08	0.08	0.28	0.1	0.1	0.36	0.22	0.08	0.12	0.1	0.36	0.08	0.42	0.12	0.1	0.6	1.0
SWGCP_only_5000/SWlin2006.17075.cnf	0.2	0.5	0.08	0.08	0.3	0.28	0.1	0.28	0.36	0.3	0.1	0.44	0.48	0.36	0.08	0.38	0.24	0.1	0.7	1.1
SWGCP_only_5000/SWlin2006.17076.cnf	0.26	0.88	0.08	0.1	0.44	0.42	0.12	0.42	0.46	0.42	0.16	0.68	0.68	0.42	0.12	0.56	0.36	0.12	0.92	1.8
SWGCP_only_5000/SWlin2006.17077.cnf	0.2	0.06	0.08	0.08	0.42	0.3	0.12	0.34	0.42	0.22	0.12	0.62	0.8	0.56	0.08	0.46	0.26	0.1	0.72	1.42
SWGCP_only_5000/SWlin2006.17078.cnf	0.22	0.66	0.1	0.08	0.34	0.32	0.1	0.32	0.38	0.36	0.12	0.58	0.78	0.14	0.08	0.44	0.26	0.1	0.86	1.28
SWGCP_only_5000/SWlin2006.17079.cnf	0.18	0.44	0.08	0.08	0.28	0.28	0.1	0.22	0.16	0.3	0.1	0.48	0.64	0.02	0.08	0.38	0.1	0.1	0.64	1.0
SWGCP_only_5000/SWlin2006.17080.cnf	0.14	0.38	0.06	0.08	0.3	0.26	0.1	0.26	0.3	0.28	0.08	0.46	0.6	0.34	0.08	0.36	0.2	0.1	0.7	0.92
SWGCP_only_5000/SWlin2006.17081.cnf	0.3	0.36	0.12	0.12	0.5	0.4	0.12	0.32	0.08	0.42	0.14	0.56	0.7	0.8	0.1	0.42	0.34	0.12	1.04	1.96
SWGCP_only_5000/SWlin2006.17082.cnf	0.26	0.44	0.08	0.1	0.36	0.22	0.12	0.34	0.44	0.08	0.1	0.28	0.86	0.52	0.08	0.48	0.28	0.1	0.74	1.34
SWGCP_only_5000/SWlin2006.17083.cnf	0.26	0.54	0.12	0.1	0.4	0.36	0.12	0.34	0.42	0.4	0.12	0.56	0.84	0.62	0.1	0.46	0.22	0.1	0.88	1.5
SWGCP_only_5000/SWlin2006.17084.cnf	0.2	0.48	0.06	0.08	0.26	0.26	0.08	0.24	0.32	0.28	0.08	0.42	0.48	0.4	0.08	0.36	0.22	0.1	0.58	0.86
SWGCP_only_5000/SWlin2006.17085.cnf	0.2	0.28	0.08	0.12	0.34	0.3	0.12	0.3	0.34	0.26	0.1	0.44	0.46	0.32	0.1	0.42	0.24	0.08	0.74	1.58
SWGCP_only_5000/SWlin2006.17086.cnf	0.3	0.92	0.08	0.12	0.42	0.36	0.12	0.42	0.44	0.38	0.12	0.76	0.74	0.56	0.12	0.56	0.32	0.1	0.54	1.8
SWGCP_only_5000/SWlin2006.17087.cnf	0.26	0.6	0.08	0.1	0.4	0.36	0.14	0.34	0.34	0.48	0.14	0.52	0.66	0.36	0.08	0.52	0.28	0.12	0.86	1.74
SWGCP_only_5000/SWlin2006.17088.cnf	0.26	0.48	0.12	0.12	0.34	0.4	0.14	0.34	0.36	0.34	0.12	0.64	0.56	0.48	0.12	0.58	0.28	0.12	0.92	1.62
SWGCP_only_5000/SWlin2006.17089.cnf	0.28	0.68	0.14	0.12	0.44	0.46	0.14	0.38	0.5	0.42	0.12	0.72	0.68	0.5	0.1	0.18	0.26	0.12	0.76	1.74
SWGCP_only_5000/SWlin2006.17090.cnf	0.2	0.4	0.08	0.08	0.32	0.32	0.12	0.3	0.26	0.38	0.12	0.48	0.62	0.28	0.1	0.4	0.26	0.1	0.84	1.22
SWGCP_only_5000/SWlin2006.17091.cnf	0.2	0.44	0.12	0.12	0.3	0.34	0.12	0.34	0.3	0.26	0.12	0.4	0.44	0.34	0.1	0.52	0.22	0.1	0.74	1.58
SWGCP_only_5000/SWlin2006.17092.cnf	0.28	0.88	0.1	0.12	0.42	0.42	0.12	0.38	0.58	0.52	0.1	0.58	1.12	0.52	0.12	0.5	0.3	0.12	0.98	1.78
SWGCP_only_5000/SWlin2006.17093.cnf	0.18	0.02	0.08	0.1	0.04	0.24	0.1	0.26	0.04	0.34	0.1	0.4	0.06	0.28	0.06	0.08	0.06	0.1	0.7	0.96
SWGCP_only_5000/SWlin2006.17094.cnf	0.26	0.08	0.12	0.1	0.38	0.4	0.1	0.34	0.58	0.38	0.12	0.7	0.76	0.68	0.1	0.56	0.3	0.1	0.82	1.52
SWGCP_only_5000/SWlin2006.17095.cnf	0.2	0.74	0.08	0.06	0.34	0.34	0.12	0.24	0.44	0.38	0.1	0.52	0.6	0.48	0.08	0.4	0.22	0.08	0.86	1.22
SWGCP_only_5000/SWlin2006.17096.cnf	0.28	0.74	0.12	0.1	0.42	0.38	0.14	0.38	0.36	0.5	0.12	0.5	0.78	0.36	0.1	0.54	0.28	0.1	1.14	1.94
SWGCP_only_5000/SWlin2006.17097.cnf	0.26	0.58	0.08	0.1	0.34	0.36	0.12	0.3	0.38	0.42	0.1	0.68	0.56	0.26	0.1	0.44	0.24	0.12	0.7	1.46
SWGCP_only_5000/SWlin2006.17098.cnf	0.22	0.4	0.08	0.08	0.32	0.28	0.12	0.32	0.3	0.34	0.12	0.44	0.42	0.36	0.06	0.44	0.24	0.12	0.66	1.34
[truncated: 3,001 more rows]
